# Supplementary material for: Synthesis of the indeno[1,2-b]indole core of janthitrem B
Source: Royal Society of Chemistry journal article supplement (doi:10.1039/d3ob01566a), 2023-01-01
Supplement: d3ob01566a1.pdf [file d3ob01566a1.pdf]

## Supporting Information

### Synthesis of the indeno[1,2-*b*]indole core of janthitrem B

Marvin Fresia,<sup>a</sup> Alexandra Dierks,<sup>a</sup> Peter G. Jones<sup>b</sup> and Thomas Lindel<sup>\*a</sup>

<sup>a</sup> Institute of Organic Chemistry, Technical University Braunschweig, Hagenring 30, 38106 Braunschweig, Germany

<sup>b</sup> Institute of Inorganic and Analytical Chemistry, Technical University Braunschweig, Hagenring 30, 38106 Braunschweig, Germany

# Contents

|          |                                                                                                                  |            |
|----------|------------------------------------------------------------------------------------------------------------------|------------|
| <b>1</b> | <b>Additional synthetic routes</b>                                                                               | <b>S3</b>  |
| 1.1      | Synthesis of cyclopentadiene <b>9</b>                                                                            | S3         |
| 1.2      | Attempted Barton-McCombie deoxygenation                                                                          | S5         |
| <b>2</b> | <b>General information</b>                                                                                       | <b>S6</b>  |
| 2.1      | General Methods                                                                                                  | S6         |
| 2.2      | Materials                                                                                                        | S6         |
| 2.3      | Instrumentation                                                                                                  | S6         |
| <b>3</b> | <b>Experimental procedures and analytical data</b>                                                               | <b>S8</b>  |
| 3.1      | 2-Methylcyclohex-1-ene-1-carboxylic acid ( <b>4</b> )                                                            | S8         |
| 3.2      | (1 <i>H</i> -Benzo[ <i>d</i> ][1,2,3]triazol-1-yl)(2-methylcyclohex-1-en-1-yl)methanone ( <b>5</b> )             | S9         |
| 3.3      | (1 <i>H</i> -Indol-3-yl)(2-methylcyclohex-1-en-1-yl)methanone ( <b>6</b> )                                       | S9         |
| 3.4      | <i>cis</i> -4a-Methyl-1,3,4,4a,5,10a-hexahydroindeno[1,2- <i>b</i> ]indol-10(2 <i>H</i> )-one ( <b>7</b> )       | S10        |
| 3.5      | (1-Methyl-1 <i>H</i> -indol-3-yl)(2-methylcyclohex-1-en-1-yl)methanone ( <b>S20</b> )                            | S11        |
| 3.6      | <i>cis</i> -4a,5-Dimethyl-1,3,4,4a,5,10a-hexahydroindeno[1,2- <i>b</i> ]indol-10(2 <i>H</i> )-one ( <b>S21</b> ) | S12        |
| 3.7      | 3-((2-Methylcyclohex-1-en-1-yl)methyl)-1 <i>H</i> -indole ( <b>S2</b> )                                          | S12        |
| 3.8      | 3-((2-Methylcyclohex-1-en-1-yl)methyl)-1-tosyl-1 <i>H</i> -indole ( <b>S3</b> )                                  | S13        |
| 3.9      | Epoxide <b>S4</b>                                                                                                | S14        |
| 3.10     | 1-(1-Methylcyclopentyl)-2-(1-tosyl-1 <i>H</i> -indol-3-yl)ethan-1-one ( <b>S5</b> )                              | S15        |
| 3.11     | (2-Methylcyclohex-1-en-1-yl)(1-tosyl-1 <i>H</i> -indol-3-yl)methyl acetate ( <b>S9</b> )                         | S16        |
| 3.12     | ( <i>E</i> )-3-((2-Methylcyclohex-2-en-1-ylidene)methyl)-1-tosyl-1 <i>H</i> -indole ( <b>S10</b> )               | S17        |
| 3.13     | <i>cis</i> -Hydrindanone <b>8</b>                                                                                | S18        |
| 3.14     | 4a-Methyl-5-tosyl-1,2,3,4,4a,5-hexahydroindeno[1,2- <i>b</i> ]indole ( <b>9</b> )                                | S18        |
| 3.15     | Bromohydrin <b>10</b>                                                                                            | S19        |
| 3.16     | Cyclobutane <b>11</b>                                                                                            | S20        |
| 3.17     | Diol <b>14</b>                                                                                                   | S21        |
| 3.18     | Sulfite <b>16</b>                                                                                                | S22        |
| 3.19     | Ketone <b>17</b>                                                                                                 | S23        |
| 3.20     | Diol <b>18</b>                                                                                                   | S23        |
| 3.21     | Sulfite <b>19</b>                                                                                                | S24        |
| 3.22     | <i>cis</i> -Hydrindanone <b>20</b>                                                                               | S25        |
| 3.23     | <i>trans</i> -Hydrindanone <b>21</b>                                                                             | S26        |
| 3.24     | Alcohol <b>S11</b>                                                                                               | S27        |
| 3.25     | Silyl ether <b>S13</b> and xanthate <b>S12</b>                                                                   | S28        |
| 3.26     | <i>cis</i> -Hydrindane <b>S14</b>                                                                                | S29        |
| 3.27     | Alcohols <b>S15</b> and <b>S22</b>                                                                               | S30        |
| 3.28     | Xanthates <b>S16</b> and <b>S23</b> and silyl ether <b>S17</b>                                                   | S31        |
| 3.29     | Dithiolane <b>22</b>                                                                                             | S33        |
| 3.30     | <i>trans</i> -Hydrindane <b>23</b>                                                                               | S34        |
| 3.31     | <i>trans</i> -Hydrindane <b>24</b>                                                                               | S35        |
| <b>4</b> | <b>NMR spectra of new compounds</b>                                                                              | <b>S37</b> |
| <b>5</b> | <b>X-ray crystallographic data</b>                                                                               | <b>S88</b> |

## 1.1 Synthesis of cyclopentadiene 9

After considerable experimentation, we managed to allylate indole with 2-methylcyclohexenyl-methanol (**S1**) in the presence of  $\text{MoO}_2(\text{acac})_2/\text{NH}_4\text{PF}_6$  (10%) in nitromethane<sup>[1]</sup> in modest yield (27%), whereby many side products formed (Scheme S1). We exposed purified allylindole **S2** to various Lewis acids and observed only decomposition (TMSOTf, TBSOTf, TIPSOTf,  $\text{AlCl}_3$ ,  $\text{SnCl}_4$ ) or no conversion ( $\text{Au}(\text{PPh}_3)\text{NTf}_2$ ,  $\text{AgPF}_6$ ). Our case differs from Dethe's examples, as the carbon next to the double bond (C-6') is secondary, while the published examples only contained quaternary carbons. We decided to N-tosylate the rather sensitive 3-allylated product **S2** to the more stable compound **S3** and attempted an epoxidation/ring opening/cyclization sequence. After tosyl protection, epoxidation with *m*-CPBA afforded cyclohexene oxide **S4** without affecting the indole nucleus. Upon exposure to  $\text{BF}_3 \cdot \text{OEt}_2$ , epoxide **S4** did not form the desired tetracycle **S6**, but underwent ring contraction to acyl cyclopentane **S5** by Meinwald rearrangement. The desired cyclization is probably not prevented by the N-tosyl group, since the free indole reacted in the same manner. In orienting experiments, we obtained the analogous epoxide and acylcyclopentane, which could not be fully characterized because of inseparable, colored by-products.

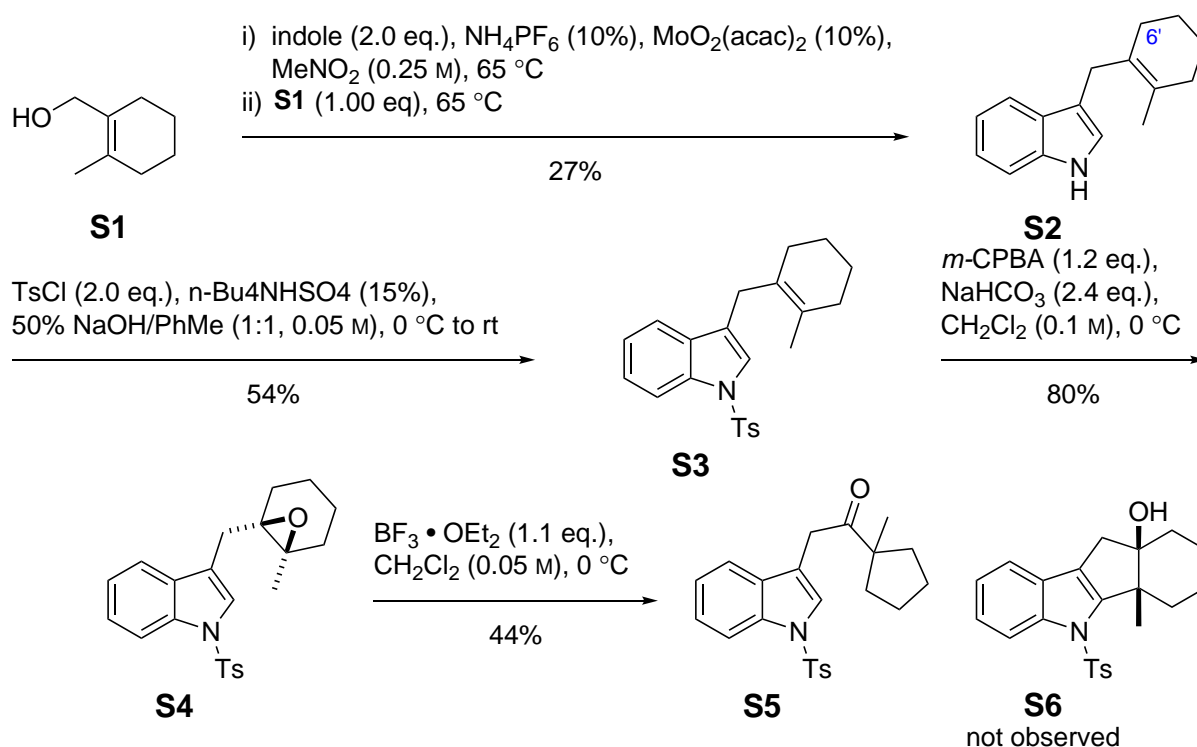

Scheme S1. Attempted epoxidation/ring opening/cyclization sequence to synthesize indeno[1,2-*b*]indole **S5**.

[1] H. Yang, L. Fang, M. Zhang, C. Zhu, *Eur. J. Org. Chem.* **2009**, 2009, 666–672.

## 1 Additional synthetic routes

Ramasastry and coworkers reported the Pd-catalyzed 5-endo-trig cyclization of bisallylacetates affording N-tosylated indeno[*b*]indoles.<sup>[2]</sup> Thus, we synthesized the new bisallylacetate **S9** by hydroxyalkylation of 3-iodo-N-tosylindole with aldehyde **S8**, after iodine/Li exchange, followed by acetylation (Scheme S2). When the acid-sensitive allylic acetate **S9** was treated with PdCl<sub>2</sub> (10%) in toluene (80 °C), we did not observe any cyclization. Instead, elimination of HOAc had occurred, yielding dienylindole **S10** with a C-2'/C-3' cyclohexene double bond. The difference from the published case is again the absence of the geminal methyl groups at C-6', which may induce a conformation of the intermediate  $\eta^3$ -Pd complex, which favors cyclization.

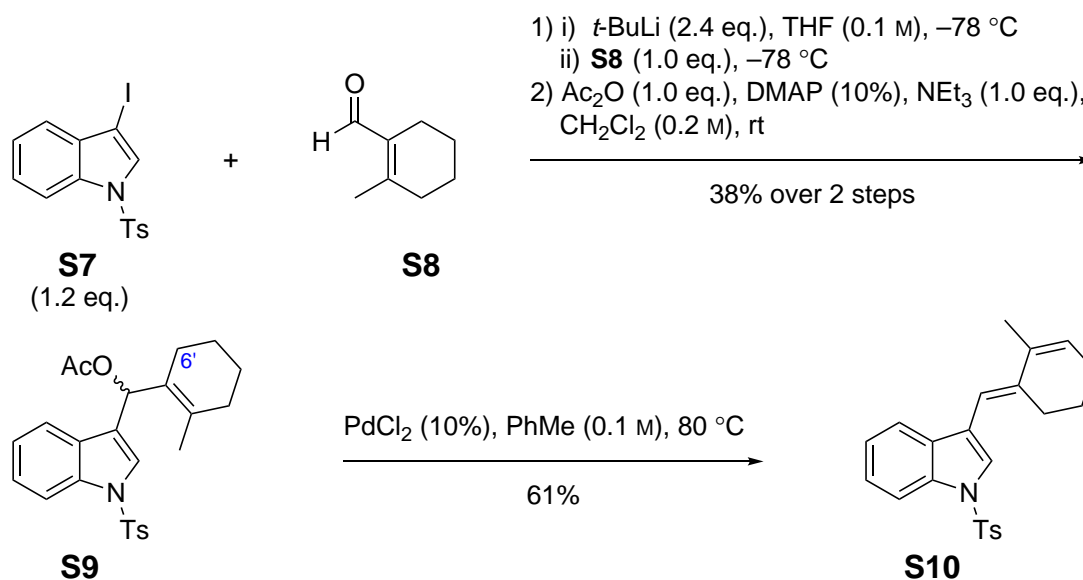

Scheme S2. Synthesis and attempted cyclizations of bisallylacetate **S9**.

[2] B. Singh, S. K. Bankar, K. Kumar, S. S. V. Ramasastry, *Chem. Sci.* **2020**, *11*, 4948–4953.



## 1.2 Attempted Barton-McCombie deoxygenation

Orienting experiments on a Barton-McCombie deoxygenation of *trans*-hydrindane **21** were conducted with the *cis*-isomer **20** in order to save precious material. DIBAL-H reduction of **20** occurred from the convex side and afforded alcohol **S11** diastereoselectively (Scheme S3). Conversion to xanthate **S12** was accompanied by the stable trimethylsilyl ether **S13**. Radical reduction (HSn(*n*-Bu)<sub>3</sub>/AIBN) gave *cis*-hydrindane **S14**, albeit in modest yield (30%).

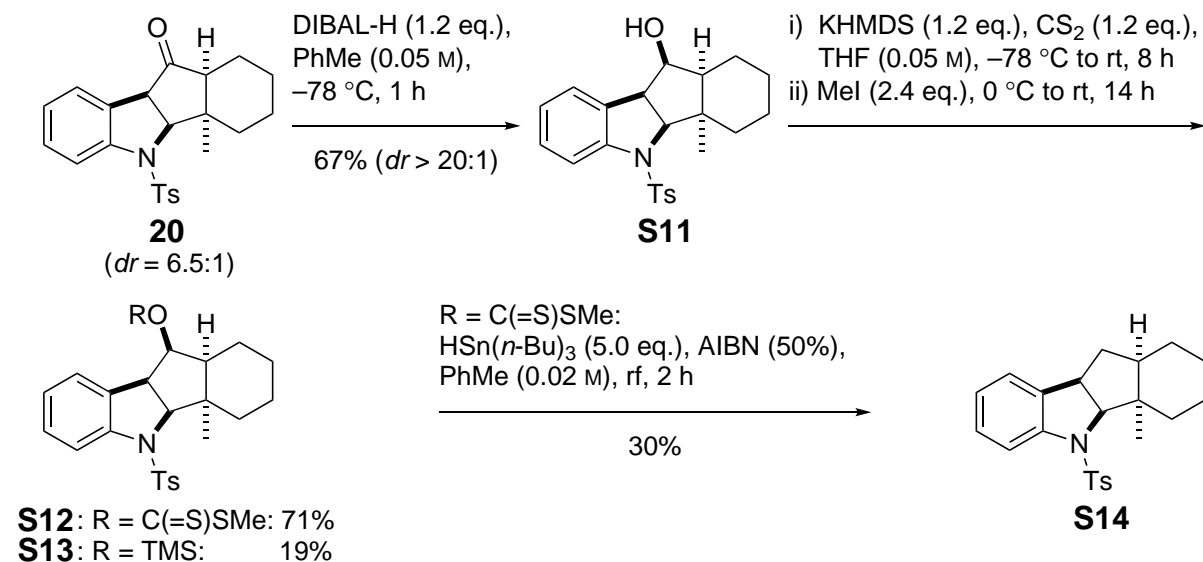Scheme S3. Barton-McCombie deoxygenation of *cis*-hydrindanone **20**.

Next, we applied the same sequence with *trans*-hydrindanone **21**. DIBAL-H reduction afforded the secondary alcohol **S15**, this time as a mixture (5:2) of diastereomers (Scheme S4). These were converted into xanthates **S16** in low yield. Disastrously, the radical reduction employing Et<sub>3</sub>B as radical starter to lower the reaction temperature, resulted only in decomposition. Since the conversion of alcohol **S15** into xanthate **S16** was already sluggish, we did not pursue this strategy any further.

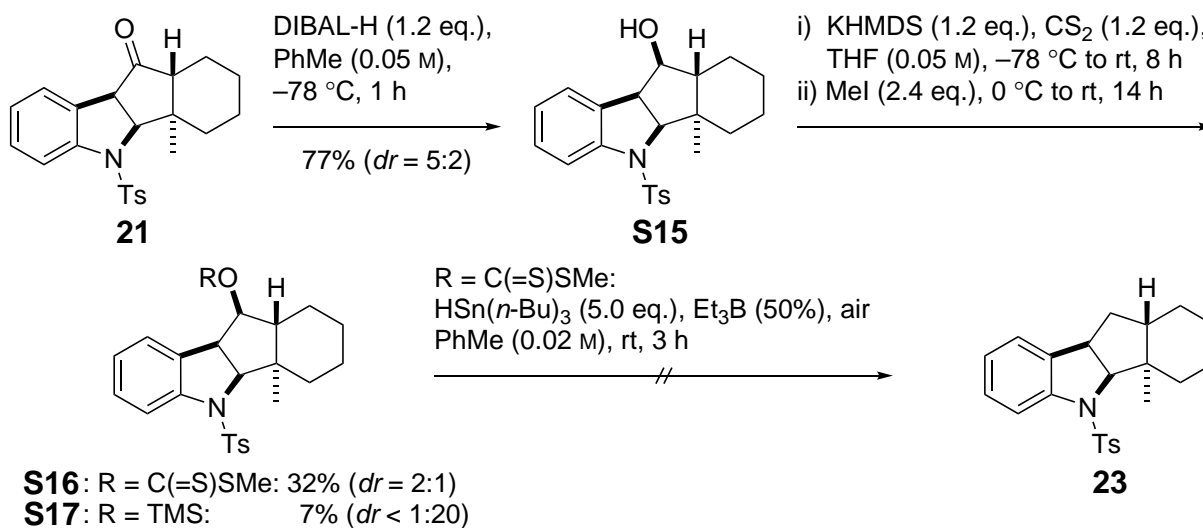Scheme S4. Attempted Barton-McCombie deoxygenation of *trans*-hydrindanone **21**.

## 2 General information

### 2.1 General Methods

Air- and moisture-sensitive liquids were transferred by syringe. Analytical thin-layer chromatography (TLC) was performed using aluminum plates pre-coated with silica gel (silica gel 60 F<sub>254</sub>, Merck or silica gel 60 RP-18 F<sub>254S</sub>, Merck). TLC plates were visualized by exposure to ultraviolet light ( $\lambda = 254$  nm) and then were stained by submersion in a vanillin solution (6.8 g vanillin dissolved in 200 mL EtOH and 2.5 mL H<sub>2</sub>SO<sub>4</sub>) followed by a brief heating. Concentration under reduced pressure was performed by rotary evaporation at 50 °C, unless otherwise noted. Flash column chromatography was performed on Merck silica gel 60 (40 – 63  $\mu$ m). Column height was 15 cm, unless otherwise noted.

### 2.2 Materials

Chemicals were purchased from commercial suppliers and used without further purification. Solvents were dried prior to use by using standard methods<sup>[3]</sup>, unless otherwise noted.

### 2.3 Instrumentation

NMR spectra were recorded with a Bruker AV III 400 (400 MHz for <sup>1</sup>H) or a Bruker AVIIIHD500 (500 MHz for <sup>1</sup>H) spectrometer at 299 K. <sup>11</sup>B, <sup>13</sup>C and <sup>19</sup>F NMR spectra were recorded with broadband <sup>1</sup>H-decoupling. <sup>1</sup>H chemical shifts are given in ppm ( $\delta$  scale) relative to tetramethylsilane with tetramethylsilane as the internal standard (<sup>1</sup>H = 0.00 ppm). <sup>13</sup>C chemical shifts are given in ppm ( $\delta$  scale) relative to tetramethylsilane with the residual solvent peak as the internal standard (<sup>13</sup>C = 77.16 ppm (CDCl<sub>3</sub>), 128.06 ppm (C<sub>6</sub>D<sub>6</sub>)). The signals were assigned by <sup>1</sup>H,<sup>13</sup>C-HSQC-, <sup>1</sup>H,<sup>13</sup>C-HMBC-, <sup>1</sup>H,<sup>1</sup>H-COSY-, and <sup>1</sup>H,<sup>1</sup>H-NOESY-experiments. The multiplicities are given as s (singlet), d (doublet), t (triplet), q (quartet), quin (quintet), sext (sextet), sept (septet), m (multiplet) or a combination thereof.

Mass spectra were obtained with a ThermoFinnigan MAT95XL or a ThermoFisher Scientific (LTQ-Orbitrap Velos) spectrometer.

IR spectra were recorded with a Bruker Tensor 27 spectrometer using diamond ATR technique. UV/Vis spectra were measured with a Varian Cary 100 Bio UV/Vis spectrometer.

Irradiations were carried out in a Rayonet (RPR-200) reactor equipped with 16 x RPR-3000Å ( $\lambda_{\max} = 300$  nm) or 16 x RPR-3500Å ( $\lambda_{\max} = 350$  nm) using a self-made flow reactor. The flow reactor (Figure S1) consists of FEP tubing (inner diameter: 0.8 mm, outer diameter: 1.6 mm, length: 10 m) wrapped around a 2.5 L amber glass bottle (outer diameter: 13 cm). The solutions were pumped through the reactor with a syringe or HPLC pump and collected in a flask wrapped in aluminum foil.

[3] W. L. F. Armarego, *Purification of laboratory chemicals*, Eighth edition / W.L.F. Armarego, Butterworth-Heinemann, Amsterdam, 2017.

## 2 General information

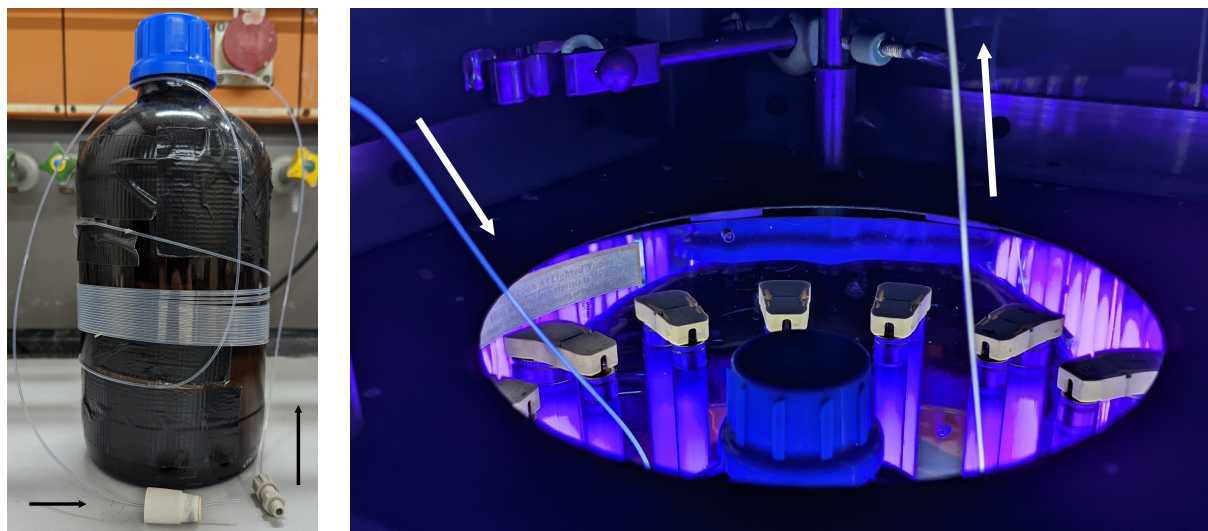

Figure S1. Flow reactor (left) and flow reactor inside the Rayonet reactor (right).

3.1 2-Methylcyclohex-1-ene-1-carboxylic acid (**4**)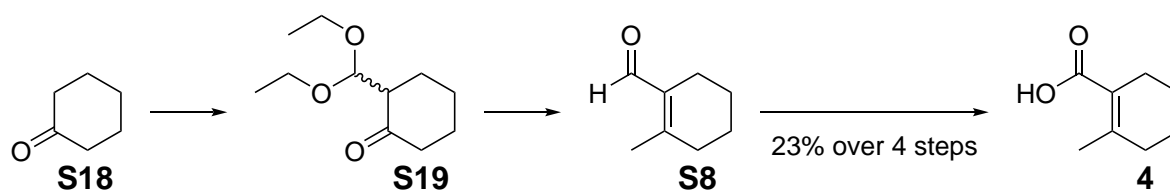

To triethyl orthoformate (67 mL, 400 mmol, 2.00 eq.) under argon was added dropwise a solution of  $\text{BF}_3 \cdot \text{OEt}_2$  (61 mL, 480 mmol, 2.40 eq.) in  $\text{CH}_2\text{Cl}_2$  (200 mL) at  $-30^\circ\text{C}$ . The mixture was stirred at  $0^\circ\text{C}$  for 20 min. Cyclohexanone (**S18**, 21 mL, 200 mmol, 1.00 eq.) was added dropwise at  $-78^\circ\text{C}$ . DIPEA (100 mL, 600 mmol, 3.00 eq.) was added dropwise at  $-78^\circ\text{C}$ . The solution was stirred at  $-78^\circ\text{C}$  for 1 h and poured into sat.  $\text{NaHCO}_3$  (400 mL), diluted with  $\text{CH}_2\text{Cl}_2$  (100 mL) and stirred rapidly for 10 min. The phases were separated and the aqueous phase was extracted with  $\text{CH}_2\text{Cl}_2$  (3x100 mL). The combined organic phases were washed with ice-cold 10%  $\text{H}_2\text{SO}_4$ ,  $\text{H}_2\text{O}$ , dried over  $\text{MgSO}_4$ , filtered and concentrated. Distillation (0.8 mbar, oil bath temperature:  $120^\circ\text{C}$ ) of the residue afforded the crude ketone **S19** as a yellow oil (25.3 g).

Magnesium turnings (4.60 g, 189 mmol) were suspended in  $\text{Et}_2\text{O}$  (19 mL) under argon. At room temperature MeI (1.0 mL, 16 mmol) was added and the reaction mixture stirred until the exothermic reaction obviously started. A solution of MeI (11 mL, 173 mmol) in  $\text{Et}_2\text{O}$  (48 mL) was added dropwise at  $0^\circ\text{C}$ . The mixture was stirred for 40 min under reflux. A solution of the crude ketone **S19** (25.3 g) in  $\text{Et}_2\text{O}$  (42 mL) was added dropwise at  $0^\circ\text{C}$  and stirred at that temperature for 40 min. The mixture was diluted with  $\text{Et}_2\text{O}$  (42 mL) and stirred for 20 min under reflux. The reaction was quenched by the addition of 1 M HCl (210 mL) at  $0^\circ\text{C}$ . The phases were separated and the aqueous phase was extracted with  $\text{Et}_2\text{O}$  (3x100 mL). The combined organic phases were washed with  $\text{H}_2\text{O}$ , dried over  $\text{MgSO}_4$ , filtered and concentrated. The obtained residue (19.3 g) was dissolved in acetone (76 mL) and 2 M HCl (24 mL). The solution was stirred for 2.5 h under reflux.  $\text{H}_2\text{O}$  (200 mL) was added at room temperature and the mixture was extracted with  $\text{Et}_2\text{O}$  (3x100 mL). The combined organic phases were washed with  $\text{H}_2\text{O}$  and sat. NaCl, dried over  $\text{MgSO}_4$ , filtered and concentrated. Distillation (0.6 mbar, oil bath temperature:  $80^\circ\text{C}$ ) of the residue afforded the crude aldehyde **S8** as a colorless oil (10.8 g).

To a solution of the crude aldehyde **S8** (10.8 g) and 2-methyl-2-butene (28 mL, 262 mmol) in *t*-BuOH (260 mL) was added a solution of  $\text{NaH}_2\text{PO}_4$  (20.9 g, 174 mmol) and  $\text{NaClO}_2$  (18.9 g, 209 mmol) in  $\text{H}_2\text{O}$  (87 mL) dropwise at room temperature. The mixture was rapidly stirred for 20 h at room temperature. *t*-BuOH was removed under reduced pressure and the pH was adjusted to 3 by the addition of 2 M HCl. The mixture was extracted with TBME (3x200 mL). The combined organic phases were concentrated to about one-tenth of the original volume and extracted with sat.  $\text{NaHCO}_3$  (5x50 mL). The pH of the combined aqueous phases was adjusted to 3 by the addition of 2 M HCl. The mixture was extracted with TBME (3x100 mL). The combined organic phases were washed with  $\text{H}_2\text{O}$  and sat. NaCl, dried over  $\text{MgSO}_4$ , filtered and concentrated. 2-Methylcyclohex-1-ene-1-carboxylic acid (**4**) was obtained as a colorless solid (6.35 g, 45.3 mmol, 23% over 4 steps). Analytical data are in agreement with the previously reported.<sup>[4]</sup>

[4] R. K. Dieter, Y. Jenkitkasemwong, J. W. Dieter, *J. Org. Chem.* **1984**, *49*, 3183–3195.

3.2 (1*H*-Benzo[*d*][1,2,3]triazol-1-yl)(2-methylcyclohex-1-en-1-yl)methanone (5)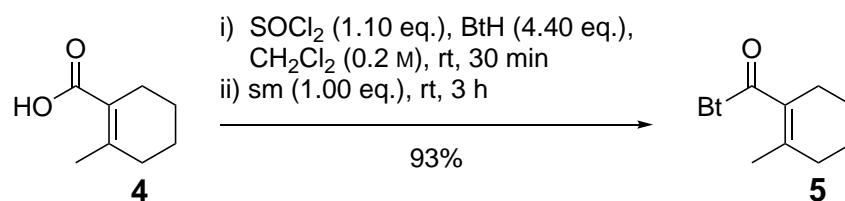

To a solution of benzotriazole (13.2 g, 111 mmol, 4.40 eq.) in CH<sub>2</sub>Cl<sub>2</sub> (130 mL) was added SOCl<sub>2</sub> (2.0 mL, 27.6 mmol, 1.10 eq.) dropwise at room temperature. The solution was stirred for 30 min at room temperature. Carboxylic acid **4** (3.52 g, 25.1 mmol, 1.00 eq.) was added and the mixture stirred for 3 h at room temperature. The suspension was filtered through a pad of silica gel (rinsed with CH<sub>2</sub>Cl<sub>2</sub>) and the filtrate concentrated. The residue was dissolved in TBME (100 mL) and washed with sat. NaHCO<sub>3</sub> (3x30 mL), dried over MgSO<sub>4</sub>, filtered and concentrated. Flash column chromatography on silica gel [petroleum ether/EtOAc (20:1)] afforded *N*-acylbenzotriazole **5** as a colorless solid (5.66 g, 23.5 mmol, 93%).

**TLC** [petroleum ether/EtOAc (8:1)]: *R*<sub>f</sub> = 0.56 [vanillin: yellow].

**<sup>1</sup>H NMR** (500 MHz, CDCl<sub>3</sub>, 2-methylcyclohex-1-ene moiety marked with \*): δ [ppm] = 8.35 – 8.30 (m, 1 H, 7-*H*), 8.16 – 8.10 (m, 1 H, 4-*H*), 7.69 – 7.64 (m, 1 H, 6-*H*), 7.54 – 7.48 (m, 1 H, 5-*H*), 2.51 – 2.44 (m, 2 H, 6\*-*H*), 2.25 – 2.16 (m, 2 H, 3\*-*H*), 1.82 – 1.75 (m, 4 H, 4\*-*H*, 5\*-*H*), 1.73 – 1.69 (m, 3 H, 2\*-CH<sub>3</sub>).

**<sup>13</sup>C NMR** (126 MHz, CDCl<sub>3</sub>, 2-methylcyclohex-1-ene moiety marked with \*): δ [ppm] = 170.6 (1 C, 1-(C=O)-1\*), 146.3 (1 C, C-3a\*), 141.0 (1 C, C-2\*), 131.5 (1 C, C-7a\*), 130.3 (1 C, C-6), 127.2 (1 C, C-1\*), 126.2 (1 C, C-5), 120.2 (1 C, C-4), 114.7 (1 C, C-7), 31.6 (1 C, C-3\*), 27.6 (1 C, C-6\*), 22.3 (1 C, C-4\*), 22.2 (1 C, C-5\*), 21.6 (1 C, 2\*-CH<sub>3</sub>).

**IR** (diamond ATR):  $\tilde{\nu}$  [cm<sup>-1</sup>] = 2935 (m), 2853 (m), 2165 (m), 2024 (m), 1974 (m), 1707 (s), 1670 (m), 1600 (m), 1482 (m), 1442 (m), 1363 (s), 1319 (m), 1282 (s), 1227 (m), 1191 (m), 1135 (m), 1097 (m), 1040 (s), 1005 (m), 929 (s), 876 (s), 786 (s), 742 (s), 624 (s), 546 (m).

**UV/Vis** (THF): λ<sub>max</sub> (lg ε) = 299 (3.40), 266 (3.31).

**ESI-HRMS**: calculated [C<sub>14</sub>H<sub>15</sub>N<sub>3</sub>O+Na]<sup>+</sup>: 264.11073

found: 264.11076 (0.11 ppm).

3.3 (1*H*-Indol-3-yl)(2-methylcyclohex-1-en-1-yl)methanone (6)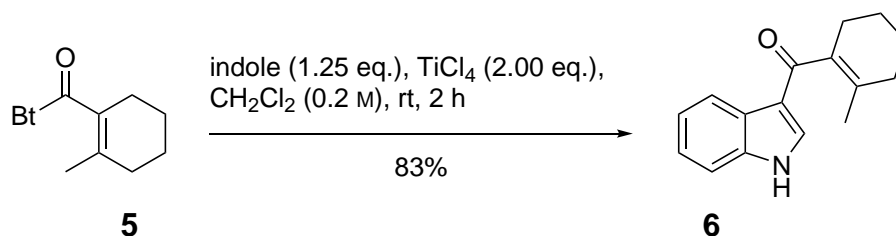

To a solution of *N*-acyl benzotriazole **5** (2.4 g, 10 mmol, 1.00 eq.) and indole (1.46 g, 12.5 mmol, 1.25 eq.) in CH<sub>2</sub>Cl<sub>2</sub> (50 mL) was added TiCl<sub>4</sub> (2.2 mL, 20 mmol, 2.00 eq.) dropwise at room temperature. The solution was stirred for 2 h at room temperature. The reaction was quenched by the addition of 25% NaOH (13 mL, 100 mmol, 10.0 eq.) at 0 °C. The mixture was stirred rapidly while warming up to room temperature. The biphasic mixture was filtered through a pad of Celite 545 (rinsed with CH<sub>2</sub>Cl<sub>2</sub>). The filtrate was dried over MgSO<sub>4</sub>, filtered and concentrated. The residue was filtered through a pad of silica gel (rinsed with CHCl<sub>3</sub>/EtOAc 4:1) and the filtrate

### 3 Experimental procedures and analytical data

concentrated. Flash column chromatography on silica gel [petroleum ether/EtOAc (6:1) to (4:1) to (2:1) to (1:1)] afforded ketone **6** as an off-white solid (1.99 g, 8.32 mmol, 83%).

**TLC** [petroleum ether/EtOAc (2:1)]:  $R_f = 0.43$  [vanillin: red].

**$^1\text{H NMR}$**  (400 MHz,  $\text{CDCl}_3$ , 2-methylcyclohex-1-ene moiety marked with \*):  $\delta$  [ppm] = 9.16 (s, 1 H, 1-*H*), 8.41 – 8.33 (m, 1 H, 4-*H*), 7.75 (d,  $J = 3.0$  Hz, 1 H, 2-*H*), 7.46 – 7.40 (m, 1 H, 7-*H*), 7.33 – 7.26 (m, 2 H, 5-*H*, 6-*H*), 2.36 – 2.26 (m, 2 H, 6\*-*H*), 2.13 – 2.04 (m, 2 H, 3\*-*H*), 1.80 – 1.66 (m, 4 H, 4\*-*H*, 5\*-*H*), 1.63 – 1.61 (m, 3 H, 2\*- $\text{CH}_3$ ).

**$^{13}\text{C NMR}$**  (101 MHz,  $\text{CDCl}_3$ , 2-methylcyclohex-1-ene moiety marked with \*):  $\delta$  [ppm] = 197.4 (1 C, 3-( $\text{C}=\text{O}$ )-1\*), 136.9 (1 C, C-7a), 134.5 (1 C, C-1\*), 133.8 (1 C, C-2), 132.0 (1 C, C-2\*), 125.6 (1 C, C-3a), 123.8 (1 C, C-6), 122.8 (1 C, C-5), 122.3 (1 C, C-4), 117.9 (1 C, C-3), 111.6 (1 C, C-7), 31.1 (1 C, C-3\*), 27.9 (1 C, C-6\*), 22.9 (1 C, C-4\*), 22.6 (1 C, C-5\*), 21.2 (1 C, 2\*- $\text{CH}_3$ ).

**IR** (diamond ATR):  $\tilde{\nu}$  [ $\text{cm}^{-1}$ ] = 3146 (w), 3063 (w), 2924 (m), 2861 (m), 2669 (w), 2294 (w), 2070 (w), 1925 (w), 1742 (w), 1663 (m), 1575 (m), 1516 (m), 1423 (s), 1380 (m), 1307 (m), 1272 (m), 1239 (m), 1169 (m), 1133 (m), 1002 (m), 933 (m), 878 (m), 779 (s), 737 (s), 653 (s), 606 (m), 548 (m).

**UV/Vis** (THF):  $\lambda_{\text{max}}$  ( $\lg \epsilon$ ) = 292 (4.04), 259 (4.00), 240 (4.15).

**ESI-HRMS**: calculated [ $\text{C}_{16}\text{H}_{17}\text{NO}+\text{Na}$ ] $^+$ : 262.12023  
found: 262.12015 (0.31 ppm).

#### 3.4 *cis*-4a-Methyl-1,3,4,4a,5,10a-hexahydroindeno[1,2-*b*]indol-10(2*H*)-one (**7**)

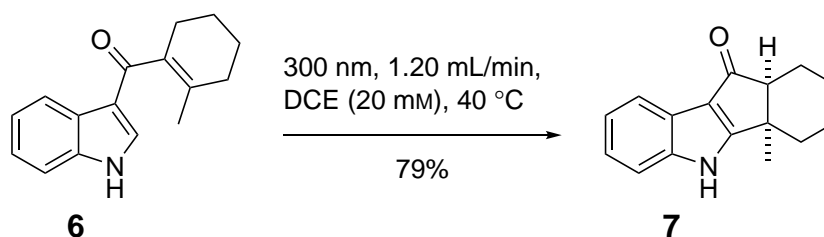

A solution of ketone **6** (1.20 g, 5.00 mmol) in DCE (250 mL) was degassed by bubbling argon through it for 10 min. The solution was pumped through the flow reactor ( $1.2 \text{ mL min}^{-1}$ ,  $\lambda = 300 \text{ nm}$ ). The solution was concentrated (the DCE was collected and reused without affecting the yield). The residue was filtered through a pad of silica gel (rinsing with  $\text{CHCl}_3/\text{EtOAc}$  2:1) and the filtrate concentrated. Flash column chromatography (dissolved in  $\text{CH}_2\text{Cl}_2$  and dry-loaded on silica gel) on silica gel [petroleum ether/EtOAc (4:1) to (2:1) to (1:1)] afforded *cis*-hydrindanone **7** as an off-white solid (947 mg, 3.96 mmol, 79%).

**TLC** [petroleum ether/EtOAc (2:1)]:  $R_f = 0.29$  [vanillin: red].

**$^1\text{H NMR}$**  (500 MHz,  $\text{CDCl}_3$ ):  $\delta$  [ppm] = 9.75 (s, 1 H, 5-*H*), 7.92 – 7.88 (m, 1 H, 9-*H*), 7.44 – 7.40 (m, 1 H, 6-*H*), 7.27 – 7.19 (m, 2 H, 7-*H*, 8-*H*), 2.77 (dd,  $J = 6.3$  Hz, 4.2 Hz, 1 H, 10a-*H*), 2.17 (dddd,  $J = 14.0$  Hz, 4.6 Hz, 4.6 Hz, 4.6 Hz, 1 H, 1-*H* (*syn* to 4a- $\text{CH}_3$ )), 1.87 (ddd,  $J = 13.6$  Hz, 8.2 Hz, 4.4 Hz, 1 H, 4-*H* (*syn* to 4a- $\text{CH}_3$ )), 1.83 – 1.74 (m, 1 H, 1-*H* (*anti* to 4a- $\text{CH}_3$ )), 1.70 (ddd,  $J = 13.6$  Hz, 8.2 Hz, 4.4 Hz, 1 H, 4-*H* (*anti* to 4a- $\text{CH}_3$ )), 1.57 – 1.27 (m, 2 H, 2-*H*, 3-*H*), 1.53 (s, 3 H, 4a- $\text{CH}_3$ ), 1.43 – 1.41 (m, 2 H, 2-*H*, 3-*H*).

**$^{13}\text{C NMR}$**  (126 MHz,  $\text{CDCl}_3$ ):  $\delta$  [ppm] = 197.9 (1 C, C-10), 174.0 (1 C, C-4b), 142.0 (1 C, C-5a), 123.8 (1 C, C-7), 122.6 (1 C, C-8), 121.6 (1 C, C-9a), 121.3 (1 C, C-9), 118.5 (1 C, C-9b), 112.4

### 3 Experimental procedures and analytical data

(1 C, C-6), 60.1 (1 C, C-10a), 39.1 (1 C, C-4a), 34.7 (1 C, C-4), 25.3 (1 C, 4a-CH<sub>3</sub>), 22.0 (1 C, C-1), 19.8 (1 C, C-2), 19.2 (1 C, C-3).

**IR** (diamond ATR):  $\tilde{\nu}$  [cm<sup>-1</sup>] = 3182 (m), 3067 (m), 2931 (m), 2861 (m), 1645 (s), 1539 (w), 1502 (w), 1449 (s), 1309 (m), 1230 (m), 1156 (m), 1092 (m), 1010 (w), 939 (w), 869 (m), 846 (w), 812 (w), 738 (s), 675 (m), 635 (m), 559 (m).

**UV/Vis** (THF):  $\lambda_{\max}$  (lg  $\epsilon$ ) = 288 (3.75), 256 (4.28), 234 (4.26).

**ESI-HRMS**: calculated [C<sub>16</sub>H<sub>17</sub>NO+H]<sup>+</sup>: 240.13829  
found: 240.13815 (0.58 ppm).

### 3.5 (1-Methyl-1*H*-indol-3-yl)(2-methylcyclohex-1-en-1-yl)methanone (**S20**)

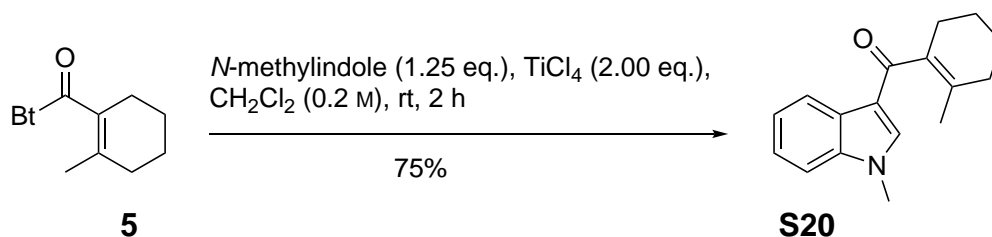

To a solution of *N*-acyl benzotriazole **5** (412 mg, 1.70 mmol, 1.00 eq.) and *N*-methylindole<sup>[5]</sup> (279 mg, 2.13 mmol, 1.25 eq.) in CH<sub>2</sub>Cl<sub>2</sub> (13 mL) was added TiCl<sub>4</sub> (1 M in CH<sub>2</sub>Cl<sub>2</sub>, 3.4 mL, 3.41 mmol, 2.00 eq.) dropwise at room temperature. The solution was stirred for 2 h at room temperature. The reaction was quenched by the addition of sat. NaHCO<sub>3</sub>. The phases were separated and the aqueous phase was extracted with CH<sub>2</sub>Cl<sub>2</sub> (3x50 mL). The combined organic phases were dried over MgSO<sub>4</sub>, filtered and concentrated. Flash column chromatography on silica gel [petroleum ether/EtOAc (4:1) to (2:1)] afforded ketone **S20** as a yellow oil which solidified in the freezer (322 mg, 1.27 mmol, 75%).

**TLC** [petroleum ether/EtOAc (4:1)]: *R<sub>f</sub>* = 0.33 [vanillin: red].

**<sup>1</sup>H NMR** (500 MHz, CDCl<sub>3</sub>, 2-methylcyclohex-1-ene moiety marked with \*):  $\delta$  [ppm] = 8.37 – 8.31 (m, 1 H, 4-*H*), 7.59 (s, 1 H, 2-*H*), 7.37 – 7.28 (m, 3 H, 5-*H*, 6-*H*, 7-*H*), 3.84 (s, 3 H, 1-CH<sub>3</sub>), 2.33 – 2.27 (m, 2 H, 6\*-*H*), 2.12 – 2.07 (m, 2 H, 3\*-*H*), 1.78 – 1.69 (m, 4 H, 4\*-*H*, 5\*-*H*), 1.64 – 1.60 (m, 3 H, 2\*-CH<sub>3</sub>).

**<sup>13</sup>C NMR** (126 MHz, CDCl<sub>3</sub>, 2-methylcyclohex-1-ene moiety marked with \*):  $\delta$  [ppm] = 196.5 (1 C, 3-(C=O)-1\*), 137.9 (1 C, C-7a), 137.5 (1 C, C-2), 134.6 (1 C, C-1\*), 131.5 (1 C, C-2\*), 126.4 (1 C, C-3a), 123.4 (1 C, C-6), 122.7 (1 C, C-5), 122.5 (1 C, C-4), 116.4 (1 C, C-3), 109.8 (1 C, C-7), 33.7 (1 C, 1-CH<sub>3</sub>), 31.1 (1 C, C-3\*), 27.9 (1 C, C-6\*), 22.9 (1 C, C-4\*), 22.7 (1 C, C-5\*), 21.2 (1 C, 2\*-CH<sub>3</sub>).

**IR** (diamond ATR):  $\tilde{\nu}$  [cm<sup>-1</sup>] = 2926 (m), 2858 (m), 1599 (m), 1519 (m), 1457 (m), 1365 (m), 1274 (w), 1220 (m), 1156 (w), 1115 (m), 1068 (m), 1011 (m), 933 (w), 867 (m), 782 (m), 739 (s), 634 (w), 580 (w).

**UV/Vis** (THF):  $\lambda_{\max}$  (lg  $\epsilon$ ) = 299 (4.15), 246 (4.17).

**ESI-HRMS**: calculated [C<sub>17</sub>H<sub>19</sub>NO+Na]<sup>+</sup>: 276.13589  
found: 276.13595 (0.22 ppm).

[5] M. P. Tantak, V. Gupta, K. Nikhil, V. Arun, R. P. Singh, P. N. Jha, K. Shah, D. Kumar, *Bioorg. Med. Chem. Lett.* **2016**, *26*, 3167–3171.

### 3.6 *cis*-4a,5-Dimethyl-1,3,4,4a,5,10a-hexahydroindeno[1,2-*b*]indol-10(2*H*)-one (S21)

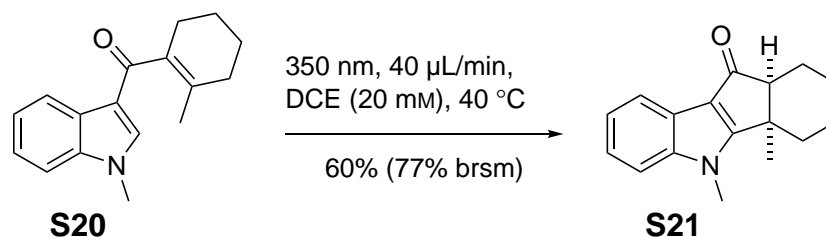

A solution of ketone **S20** (101 mg, 400  $\mu\text{mol}$ ) in DCE (20 mL) was degassed by bubbling argon through it for 10 min. The solution was pumped through the flow reactor (40  $\mu\text{L min}^{-1}$ ,  $\lambda = 350 \text{ nm}$ ). The solution was concentrated. Flash column chromatography on silica gel [petroleum ether/EtOAc (6:1) to (4:1) to (2:1)] afforded *cis*-hydrindanone **S21** (61 mg, 241  $\mu\text{mol}$ , 60%) as an off-white solid and unreacted ketone **S20** as a yellowish oil which solidified in the freezer (17 mg, 67  $\mu\text{mol}$ , 17%).

**TLC** [petroleum ether/EtOAc (4:1)]:  $R_f = 0.17$  [vanillin: red].

**$^1\text{H NMR}$**  (400 MHz,  $\text{CDCl}_3$ ):  $\delta$  [ppm] = 7.97 – 7.93 (m, 1 H, 9-*H*), 7.33 – 7.24 (m, 3 H, 6-*H*, 7-*H*, 8-*H*), 3.82 (s, 3 H, 5- $\text{CH}_3$ ), 2.72 (dd,  $J = 6.3 \text{ Hz}, 4.4 \text{ Hz}$ , 1 H, 10a-*H*), 2.20 – 2.11 (m, 1 H, 1-*H* (*anti* to 4a- $\text{CH}_3$ )), 1.98 – 1.90 (m, 1 H, 4-*H* (*syn* to 4a- $\text{CH}_3$ )), 1.84 – 1.67 (m, 2 H, 1-*H* (*syn* to 4a- $\text{CH}_3$ ), 4-*H* (*anti* to 4a- $\text{CH}_3$ )), 1.62 – 1.31 (m, 2 H, 2-*H*, 3-*H*), 1.56 (s, 3 H, 4a- $\text{CH}_3$ ), 1.44 – 1.44 (m, 2 H, 2-*H*, 3-*H*).

**$^{13}\text{C NMR}$**  (101 MHz,  $\text{CDCl}_3$ ):  $\delta$  [ppm] = 196.7 (1 C, C-10), 172.3 (1 C, C-4b), 143.3 (1 C, C-5a), 123.4 (1 C, C-7), 122.5 (1 C, C-8), 121.4 (1 C, C-9), 121.4 (1 C, C-9a), 117.8 (1 C, C-9b), 109.9 (1 C, C-6), 60.6 (1 C, C-10a), 39.6 (1 C, C-4a), 33.7 (1 C, C-4), 31.3 (1 C, 5- $\text{CH}_3$ ), 24.7 (1 C, 4a- $\text{CH}_3$ ), 21.8 (1 C, C-1), 19.7 (1 C, C-2), 19.2 (1 C, C-3).

**IR** (diamond ATR):  $\tilde{\nu}$  [ $\text{cm}^{-1}$ ] = 3054 (w), 2930 (m), 2859 (m), 1670 (s), 1523 (m), 1465 (s), 1449 (s), 1408 (s), 1326 (m), 1272 (w), 1213 (w), 1097 (m), 1052 (m), 1015 (w), 978 (w), 935 (w), 862 (m), 806 (m), 745 (s), 665 (w), 603 (w).

**UV/Vis** (THF):  $\lambda_{\text{max}}$  ( $\lg \epsilon$ ) = 291 (3.84), 279 (3.99), 256 (4.23), 237 (4.25).

**ESI-HRMS**: calculated [ $\text{C}_{17}\text{H}_{19}\text{NO}+\text{H}$ ] $^+$ : 254.15394

found: 254.15404 (0.39 ppm).

### 3.7 3-((2-Methylcyclohex-1-en-1-yl)methyl)-1*H*-indole (S2)

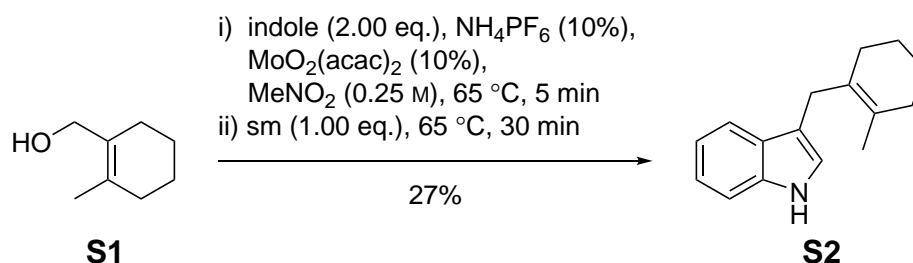

To a solution of  $\text{MoO}_2(\text{acac})_2$  (163 mg, 500  $\mu\text{mol}$ , 0.10 eq.) and  $\text{NH}_4\text{PF}_6$  (82 mg, 500  $\mu\text{mol}$ , 0.10 eq.) in nitromethane (20 mL) was added indole (1.17 g, 10.0 mmol, 2.00 eq.) at 65  $^\circ\text{C}$ . After stirring for 5 min at 65  $^\circ\text{C}$ , allylic alcohol<sup>[6]</sup> **S1** (631 mg, 5.00 mmol, 1.00 eq.) was added. The solution was stirred for 30 min at 65  $^\circ\text{C}$  and concentrated. Flash column chromatography on

[6] C. Ye, X. Kou, G. Yang, J. Shen, W. Zhang, *Tetrahedron Lett.* **2019**, *60*, 1148–1152.



### 3 Experimental procedures and analytical data

silica gel [petroleum ether/EtOAc (40:1) to (30:1)] afforded indole **S2** as a brownish oil which solidified in the freezer (304 mg, 1.35 mmol, 27%).

**TLC** [petroleum ether/EtOAc (10:1)]:  $R_f = 0.45$  [vanillin: red].

**$^1\text{H NMR}$**  (400 MHz,  $\text{C}_6\text{D}_6$ , 2-methylcyclohex-1-ene moiety marked with \*):  $\delta$  [ppm] = 7.75 – 7.72 (m, 1 H, 4-*H*), 7.26 – 7.18 (m, 2 H, 5-*H*, 6-*H*), 7.07 – 7.04 (m, 1 H, 7-*H*), 6.63 (s, 1 H, 1-*H*), 6.49 – 6.47 (m, 1 H, 2-*H*), 3.49 (s, 2 H, 3- $\text{CH}_2$ -1\*), 2.06 – 1.92 (m, 4 H, 3\*-*H*, 6\*-*H*), 1.76 (s, 3 H, 2\*- $\text{CH}_3$ ), 1.60 – 1.45 (m, 4 H, 4\*-*H*, 5\*-*H*).

**$^{13}\text{C NMR}$**  (101 MHz,  $\text{C}_6\text{D}_6$ , 2-methylcyclohex-1-ene moiety marked with \*):  $\delta$  [ppm] = 137.0 (1 C, C-7a), 129.5 (1 C, C-2\*), 128.5 (1 C, C-3a), 126.6 (1 C, C-1\*), 122.1 (1 C, C-6), 121.7 (1 C, C-2), 119.5 (1 C, C-5), 119.5 (1 C, C-4), 115.2 (1 C, C-3), 111.3 (1 C, C-7), 32.3 (1 C, C-3\*), 29.9 (1 C, C-6\*), 29.5 (1 C, 3- $\text{CH}_2$ -1\*), 24.0 (1 C, C-4\*), 23.9 (1 C, C-5\*), 19.6 (1 C, 2\*- $\text{CH}_3$ ).

**IR** (diamond ATR):  $\tilde{\nu}$  [ $\text{cm}^{-1}$ ] = 3411 (m), 3050 (w), 2919 (m), 2860 (m), 1616 (w), 1486 (w), 1448 (m), 1343 (m), 1225 (w), 1182 (w), 1136 (w), 1087 (m), 1045 (w), 1006 (w), 925 (w), 806 (w), 735 (s), 589 (m), 546 (w).

**UV/Vis** (THF):  $\lambda_{\text{max}}$  (lg  $\epsilon$ ) = 291 (3.70), 283 (3.76), 230 (4.18).

**ESI-HRMS**: calculated [ $\text{C}_{16}\text{H}_{19}\text{N}+\text{H}$ ] $^+$ : 226.15903

found: 226.15916 (0.57 ppm).

#### 3.8 3-((2-Methylcyclohex-1-en-1-yl)methyl)-1-tosyl-1*H*-indole (**S3**)

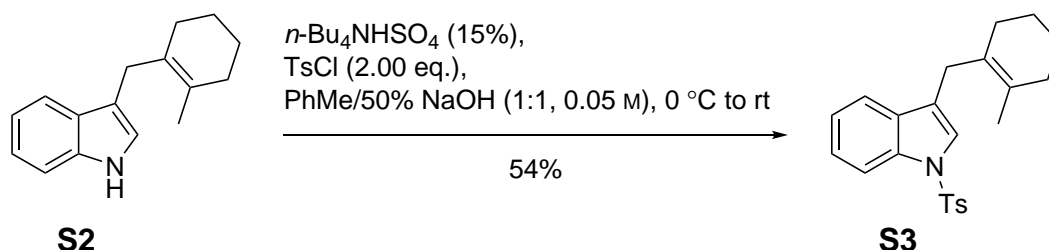

To a solution of indole **S2** (196 mg, 870  $\mu\text{mol}$ , 1.00 eq.) in PhMe (8.7 mL) was added 50% NaOH (8.7 mL),  $n\text{-Bu}_4\text{NHSO}_4$  (44 mg, 131  $\mu\text{mol}$ , 0.15 eq.) and TsCl (332 mg, 1.74 mmol, 2.00 eq.) at 0 °C. The solution was stirred for 1 h at room temperature.  $\text{H}_2\text{O}$  was added and the mixture extracted with TBME (3x50 mL). The combined organic phases were washed with sat. NaCl, dried over  $\text{MgSO}_4$ , filtered and concentrated. Flash column chromatography on silica gel [petroleum ether/EtOAc (50:1) to (20:1)] afforded tosylindole **S3** as a colorless solid (179 mg, 472  $\mu\text{mol}$ , 54%).

**TLC** [Petroleum ether/EtOAc (10:1)]:  $R_f = 0.50$  [vanillin: brown].

**$^1\text{H NMR}$**  (500 MHz,  $\text{CDCl}_3$ , 2-methylcyclohexen-1-ene moiety marked with \*):  $\delta$  [ppm] = 7.98 – 7.95 (m, 1 H, 7-*H*), 7.71 – 7.68 (m, 2 H, *o*- $\text{H}_{\text{Ts}}$ ), 7.45 – 7.43 (m, 1 H, 4-*H*), 7.31 – 7.27 (m, 1 H, 6-*H*), 7.23 – 7.16 (m, 4 H, 2-*H*, 5-*H*, *m*- $\text{H}_{\text{Ts}}$ ), 3.32 (s, 2 H, 3- $\text{CH}_2$ -1\*), 2.31 (s, 3 H, *p*- $\text{C}_{\text{Ts}}\text{-CH}_3$ ), 2.05 – 1.99 (m, 2 H, 3\*-*H*), 1.88 – 1.82 (m, 2 H, 6\*-*H*), 1.71 – 1.70 (m, 3 H, 2\*- $\text{CH}_3$ ), 1.63 – 1.52 (m, 4 H, 4\*-*H*, 5\*-*H*).

**$^{13}\text{C NMR}$**  (126 MHz,  $\text{CDCl}_3$ , 2-methylcyclohexen-1-ene moiety marked with \*):  $\delta$  [ppm] = 144.7 (1 C, *p*- $\text{C}_{\text{Ts}}$ ), 135.8 (1 C, C-7a), 135.4 (1 C, *ipso*- $\text{C}_{\text{Ts}}$ ), 131.6 (1 C, C-3a), 129.8 (2 C, *m*- $\text{C}_{\text{Ts}}$ ), 128.5 (1 C, C-2\*), 127.1 (1 C, C-1\*), 126.8 (2 C, *o*- $\text{C}_{\text{Ts}}$ ), 124.7 (1 C, C-6), 123.5 (1 C, C-2), 123.2 (1 C, C-5), 122.4 (1 C, C-3), 119.7 (1 C, C-4), 114.0 (1 C, C-7), 32.0 (1 C, C-3\*), 29.7 (1 C, C-6\*), 29.0 (1 C, 3- $\text{CH}_2$ -1\*), 23.6 (1 C, C-5\*), 23.4 (1 C, C-4\*), 21.7 (1 C, *p*- $\text{C}_{\text{Ts}}\text{-CH}_3$ ), 19.5 (1 C, 2\*- $\text{CH}_3$ ).

### 3 Experimental procedures and analytical data

**IR** (diamond ATR):  $\tilde{\nu}$  [cm<sup>-1</sup>] = 3112 (w), 3056 (w), 2926 (m), 2861 (w), 1596 (w), 1491 (w), 1443 (m), 1360 (m), 1277 (m), 1168 (s), 1105 (s), 1018 (w), 968 (m), 805 (m), 749 (s), 708 (w), 665 (s), 620 (w), 575 (s).

**UV/Vis** (THF):  $\lambda_{\max}$  (lg  $\epsilon$ ) = 294 (3.60), 254 (4.11), 224 (4.33).

**ESI-HRMS**: calculated [C<sub>23</sub>H<sub>25</sub>NO<sub>2</sub>S+H]<sup>+</sup>: 402.14982  
found: 402.14998 (0.40 ppm).

#### 3.9 Epoxide **S4**

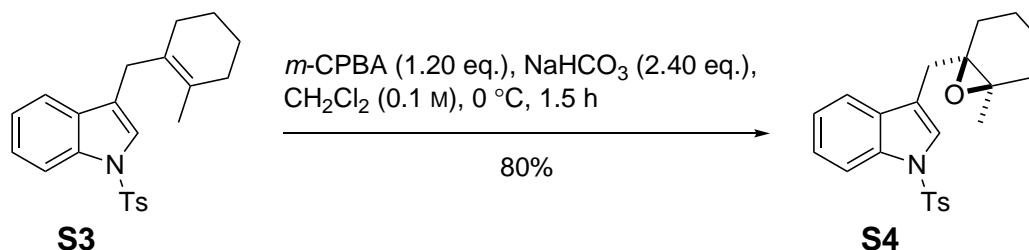

To a solution of alkene **S3** (169 mg, 445  $\mu$ mol, 1.00 eq.) in CH<sub>2</sub>Cl<sub>2</sub> (4.5 mL) was added NaHCO<sub>3</sub> (90 mg, 1.07 mmol, 2.40 eq.) and 70% *m*-CPBA (132 mg, 534  $\mu$ mol, 1.20 eq.) at 0 °C. The suspension was stirred for 1.5 h at 0 °C. The reaction was quenched by the addition of sat. Na<sub>2</sub>SO<sub>3</sub>. The phases were separated and the aqueous phase was extracted with CH<sub>2</sub>Cl<sub>2</sub> (3x20 mL). The combined organic phases were dried over MgSO<sub>4</sub>, filtered and concentrated. Flash column chromatography on silica gel [petroleum ether/EtOAc (30:1) to (20:1) to (10:1)] afforded epoxide **S4** as a colorless solid (140 mg, 354  $\mu$ mol, 80%).

**TLC** [petroleum ether/EtOAc (10:1)]:  $R_f$  = 0.28 [vanillin: brown].

**<sup>1</sup>H NMR** (400 MHz, CDCl<sub>3</sub>, 2-methylcyclohexane moiety marked with \*):  $\delta$  [ppm] = 8.01 – 7.96 (m, 1 H, 7-*H*), 7.75 – 7.70 (m, 2 H, *o*-H<sub>TS</sub>), 7.58 – 7.54 (m, 1 H, 4-*H*), 7.35 – 7.29 (m, 1 H, 6-*H*), 7.34 (s, 1 H, 2-*H*), 7.28 – 7.22 (m, 1 H, 5-*H*), 7.21 – 7.17 (m, 2 H, *m*-H<sub>TS</sub>), 2.97 (dd,  $J$  = 15.5 Hz, 1.1 Hz, 1 H, 3-CH<sub>2</sub>-1\*), 2.84 (dd,  $J$  = 15.5 Hz, 1.0 Hz, 1 H, 3-CH<sub>2</sub>-1\*), 2.33 (s, 3 H, *p*-C<sub>TS</sub>-CH<sub>3</sub>), 2.03 – 1.70 (m, 1 H, 5\*-*H*), 1.93 – 1.82 (m, 1 H, 5\*-*H*), 1.69 – 1.62 (m, 2 H, 2\*-*H*), 1.47 – 1.36 (m, 5 H, 3\*-*H*, 4\*-*H*, 6\*CH<sub>3</sub>), 1.36 – 1.12 (m, 2 H, 3\*-*H*, 4\*-*H*).

**<sup>13</sup>C NMR** (101 MHz, CDCl<sub>3</sub>, 2-methylcyclohexane moiety marked with \*):  $\delta$  [ppm] = 144.9 (1 C, *p*-C<sub>TS</sub>), 135.5 (1 C, C-7a), 135.4 (1 C, *ipso*-C<sub>TS</sub>), 131.5 (1 C, C-3a), 129.9 (2 C, *m*-C<sub>TS</sub>), 126.9 (2 C, *o*-C<sub>TS</sub>), 124.9 (1 C, C-6), 123.9 (1 C, C-2), 123.4 (1 C, C-5), 120.3 (1 C, C-4), 119.7 (1 C, C-3), 113.9 (1 C, C-7), 64.2 (1 C, C-1\*), 62.6 (1 C, C-6\*), 31.9 (1 C, C-5\*), 30.8 (1 C, 3-CH<sub>2</sub>-1\*), 28.6 (1 C, C-2\*), 21.7 (1 C, *p*-C<sub>TS</sub>-CH<sub>3</sub>), 21.2 (1 C, C-3), 20.8 (1 C, 6\*-CH<sub>3</sub>), 20.5 (1 C, C-4\*).

**IR** (diamond ATR):  $\tilde{\nu}$  [cm<sup>-1</sup>] = 3053 (w), 2931 (m), 2857 (w), 1597 (w), 1444 (m), 1356 (s), 1279 (m), 1167 (s), 1119 (s), 1022 (m), 967 (m), 907 (w), 870 (w), 808 (m), 741 (s), 663 (s), 568 (s), 542 (m).

**UV/Vis** (THF):  $\lambda_{\max}$  (lg  $\epsilon$ ) = 292 (3.60), 252 (4.11), 223 (4.26).

**ESI-HRMS**: calculated [C<sub>23</sub>H<sub>25</sub>NO<sub>3</sub>S+Na]<sup>+</sup>: 418.14474  
found: 418.14494 (0.48 ppm).

3.10 1-(1-Methylcyclopentyl)-2-(1-tosyl-1*H*-indol-3-yl)ethan-1-one (**S5**)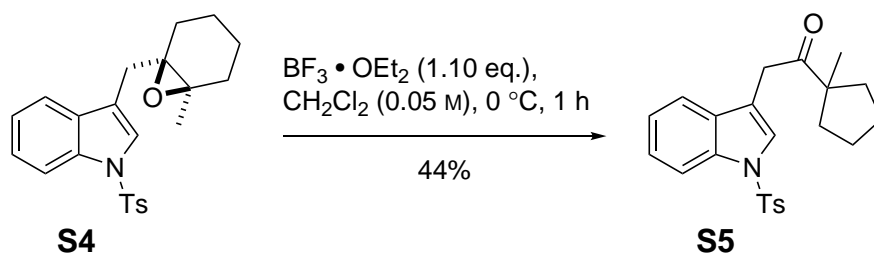

To a solution of epoxide **S4** (128 mg, 324  $\mu\text{mol}$ , 1.00 eq.) in  $\text{CH}_2\text{Cl}_2$  (6.0 mL) was added  $\text{BF}_3 \cdot \text{OEt}_2$  (50  $\mu\text{L}$ , 356  $\mu\text{mol}$ , 1.10 eq.) dropwise at 0 °C. The solution was stirred for 1 h at 0 °C. The reaction was quenched by the addition of sat.  $\text{NaHCO}_3$ . The phases were separated and the aqueous phase was extracted with  $\text{CH}_2\text{Cl}_2$  (3x20 mL). The combined organic phases were dried over  $\text{MgSO}_4$ , filtered and concentrated. Flash column chromatography on silica gel [petroleum ether/EtOAc (20:1) to (15:1) to (10:1)] afforded ketone **S5** as a colorless solid (57 mg, 144  $\mu\text{mol}$ , 44%).

**TLC** [petroleum ether/EtOAc (10:1)]:  $R_f$  = 0.25 [vanillin: brown].

**$^1\text{H NMR}$**  (500 MHz,  $\text{CDCl}_3$ , 1-methylcyclopentane moiety marked with \*):  $\delta$  [ppm] = 7.98 – 7.95 (m, 1 H, 7-*H*), 7.77 – 7.73 (m, 2 H, *o*- $H_{\text{Ts}}$ ), 7.52 – 7.51 (m, 1 H, 2-*H*), 7.43 – 7.40 (m, 1 H, 4-*H*), 7.32 – 7.28 (m, 1 H, 6-*H*), 7.24 – 7.18 (m, 3 H, 5-*H*, *m*- $H_{\text{Ts}}$ ), 3.85 (d,  $J$  = 1.0 Hz, 2 H, 3- $\text{CH}_2\text{-C(=O)-1}^*$ ), 2.33 (s, 3 H, *p*- $\text{C}_{\text{Ts}}\text{-CH}_3$ ), 2.14 – 2.05 (m, 2 H, 2\*-*H* (*syn* to 1\*- $\text{CH}_3$ ), 5\*-*H* (*syn* to 1\*- $\text{CH}_3$ )), 1.76 – 1.60 (m, 4 H, 3\*-*H*, 4\*-*H*), 1.51 – 1.43 (m, 2 H, 2\*-*H* (*anti* to 1\*- $\text{CH}_3$ ), 2\*-5 (*anti* to 1\*- $\text{CH}_3$ )), 1.29 (s, 3 H, 1\*- $\text{CH}_3$ ).

**$^{13}\text{C NMR}$**  (126 MHz,  $\text{CDCl}_3$ , 1-methylcyclopentane moiety marked with \*):  $\delta$  [ppm] = 210.9 (1 C, 3- $\text{CH}_2\text{-C(=O)-1}^*$ ), 144.9 (1 C, *p*- $\text{C}_{\text{Ts}}$ ), 135.5 (1 C, *ipso*- $\text{C}_{\text{Ts}}$ ), 135.2 (1 C, *C*-7a), 130.9 (1 C, *C*-3a), 130.0 (2 C, *m*- $\text{C}_{\text{Ts}}$ ), 127.0 (2 C, *o*- $\text{C}_{\text{Ts}}$ ), 124.9 (1 C, *C*-2), 124.8 (1 C, *C*-6), 123.3 (1 C, *C*-5), 119.6 (1 C, *C*-4), 116.2 (1 C, *C*-3), 113.9 (1 C, *C*-7), 56.3 (1 C, *C*-1\*), 36.7 (2 C, *C*-2\*, *C*-5\*), 33.8 (1 C, 3- $\text{CH}_2\text{-C(=O)-1}^*$ ), 25.3 (2 C, *C*-3\*, *C*-4\*), 24.8 (1 C, 1\*- $\text{CH}_3$ ), 21.7 (1 C, *p*- $\text{C}_{\text{Ts}}\text{-CH}_3$ ).

**IR** (diamond ATR):  $\tilde{\nu}$  [ $\text{cm}^{-1}$ ] = 3099 (w), 3057 (w), 2952 (m), 2869 (w), 1699 (m), 1597 (w), 1444 (m), 1363 (s), 1305 (m), 1280 (m), 1168 (s), 1124 (s), 1088 (s), 1016 (m), 969 (s), 814 (m), 749 (s), 697 (m), 664 (s), 604 (m), 569 (s), 542 (m).

**UV/Vis** (THF):  $\lambda_{\text{max}}$  ( $\lg \epsilon$ ) = 293 (3.61), 255 (4.11).

**ESI-HRMS**: calculated [ $\text{C}_{23}\text{H}_{25}\text{NO}_3\text{S}+\text{Na}$ ] $^+$ : 418.14474

found: 418.14493 (0.45 ppm).

3.11 (2-Methylcyclohex-1-en-1-yl)(1-tosyl-1*H*-indol-3-yl)methyl acetate (**S9**)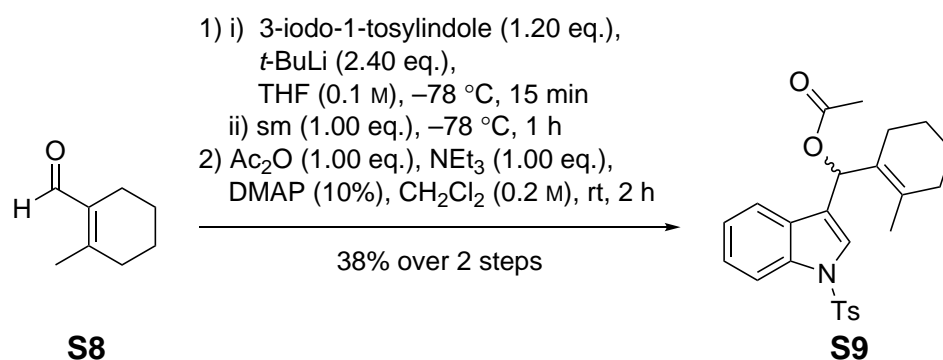

To a solution of 3-iodo-1-tosylindole<sup>[7]</sup> (2.38 g, 6.00 mmol, 1.20 eq.) in dry THF (60 mL) under argon was added *t*-BuLi (1.6 M in pentane, 7.5 mL, 12.0 mmol, 2.40 eq.) dropwise at  $-78\text{ }^{\circ}\text{C}$ . The solution was stirred for 15 min at  $-78\text{ }^{\circ}\text{C}$ . 2-Methylcyclohex-1-ene-1-carbaldehyde<sup>[8]</sup> (**S8**, 621 mg, 5.00 mmol, 1.00 eq.) was added dropwise at  $-78\text{ }^{\circ}\text{C}$ . The solution was stirred for 1 h at  $-78\text{ }^{\circ}\text{C}$ . The reaction was quenched by the addition of sat. NaHCO<sub>3</sub>. The phases were separated and the aqueous phase extracted with TBME (3x100 mL). The combined organic phases were washed with sat. NaCl, dried over MgSO<sub>4</sub>, filtered and concentrated. Flash column chromatography on silica gel [petroleum ether/EtOAc (20:1) to (10:1) to (8:1) to (6:1) to (4:1), each +1% NEt<sub>3</sub>] afforded the crude product as a purplish foam (1.00 g).

To a solution of the crude product, NEt<sub>3</sub> (700  $\mu\text{L}$ , 5.00 mmol, 1.00 eq.) and Ac<sub>2</sub>O (470  $\mu\text{L}$ , 5.00 mmol, 1.00 eq.) in CH<sub>2</sub>Cl<sub>2</sub> (30 mL) was added DMAP (61 mg, 500  $\mu\text{mol}$ , 0.10 eq.) at room temperature. The solution was stirred for 2 h at room temperature. The reaction was quenched by the addition of sat. NaHCO<sub>3</sub>. The phases were separated and the aqueous phase extracted with CH<sub>2</sub>Cl<sub>2</sub> (3x50 mL). The combined organic phases were dried over MgSO<sub>4</sub>, filtered and concentrated. Flash column chromatography on silica gel [petroleum ether/EtOAc (20:1) to (10:1) to (6:1), each +1% NEt<sub>3</sub>] afforded allylic acetate **S9** as a colorless, sticky solid (824 mg, 1.88 mmol, 38% over 2 steps).

**TLC** [petroleum ether/EtOAc (4:1)]:  $R_f = 0.31$  [vanillin: brown].

**<sup>1</sup>H NMR** (400 MHz, C<sub>6</sub>D<sub>6</sub>, 2-methylcyclohex-1-ene moiety marked with \*):  $\delta$  [ppm] = 8.26 (ddd,  $J = 8.3\text{ Hz}, 0.8\text{ Hz}, 0.8\text{ Hz}$ , 1 H, 7-*H*), 7.81 (d,  $J = 1.4\text{ Hz}$ , 1 H, 2-*H*), 7.69 – 7.64 (m, 2 H, *o*-*H*<sub>Ts</sub>), 7.46 (ddd,  $J = 7.9\text{ Hz}, 1.0\text{ Hz}, 0.9\text{ Hz}$ , 1 H, 4-*H*), 7.22 (d,  $J = 1.3\text{ Hz}$ , 1 H, 3-CH(O-C(=O)-CH<sub>3</sub>)-1\*), 7.18 – 7.12 (m, 1 H, 6-*H*), 7.03 (ddd,  $J = 8.1\text{ Hz}, 7.2\text{ Hz}, 0.9\text{ Hz}$ , 1 H, 5-*H*), 6.49 – 1.82 (m, 2 H, *m*-*H*<sub>Ts</sub>), 2.14 – 2.03 (m, 1 H, 6\*-*H*), 1.84 (s, 3 H, 2\*-CH<sub>3</sub>), 1.82 – 1.69 (m, 3 H, 3\*-*H*, 6\*-*H*), 1.68 (s, 3 H, 3-CH(O-C(=O)-CH<sub>3</sub>)-1\*), 1.61 (s, 3 H, *p*-C<sub>Ts</sub>-CH<sub>3</sub>), 1.46 – 1.32 (m, 3 H, 4\*-*H*, 5\*-*H*), 1.30 – 1.20 (m, 1 H, 5\*-*H*).

**<sup>13</sup>C NMR** (101 MHz, C<sub>6</sub>D<sub>6</sub>, 2-methylcyclohex-1-ene moiety marked with \*):  $\delta$  [ppm] = 169.2 (1 C, 3-CH(O-C(=O)-CH<sub>3</sub>)-1\*), 144.6 (1 C, *p*-C<sub>Ts</sub>), 136.4 (1 C, *C*-7a), 135.9 (1 C, *ipso*-C<sub>Ts</sub>), 133.2 (1 C, *C*-1\*), 129.8 (2 C, *m*-C<sub>Ts</sub>), 129.7 (1 C, *C*-3a), 127.8 (1 C, *C*-2\* (HMBC)), 126.9 (2 C, *o*-C<sub>Ts</sub>), 125.2 (1 C, *C*-6), 124.2 (1 C, *C*-2), 123.7 (1 C, *C*-5), 122.5 (1 C, *C*-3), 120.4 (1 C, *C*-4), 114.5 (1 C, *C*-7), 69.5 (1 C, 3-CH(O-C(=O)-CH<sub>3</sub>)-1\*), 32.4 (1 C, *C*-3\*), 24.6 (1 C, *C*-6\*), 23.1 (1 C, *C*-4\*), 23.0 (1 C, *C*-5\*), 21.0 (1 C, *p*-C<sub>Ts</sub>-CH<sub>3</sub>), 20.5 (1 C, 3-CH(O-C(=O)-CH<sub>3</sub>)-1\*), 19.6 (1 C, 2\*-CH<sub>3</sub>).

[7] B. Witulski, N. Buschmann, U. Bergsträßer, *Tetrahedron* **2000**, *56*, 8473–8480.

[8] S. M. Makin, R. I. Kruglikova, T. K. Tagirov, B. M. Arshava, *Zh. Org. Khim.* **1983**, *19*, 101–105.

### 3 Experimental procedures and analytical data

**IR** (diamond ATR):  $\tilde{\nu}$  [ $\text{cm}^{-1}$ ] = 2927 (m), 2865 (w), 1735 (m), 1598 (w), 1487 (w), 1443 (m), 1367 (s), 1275 (m), 1230 (s), 1171 (s), 1124 (s), 1015 (m), 971 (s), 810 (m), 749 (s), 672 (s), 572 (s).

**UV/Vis** (THF):  $\lambda_{\text{max}}$  ( $\lg \epsilon$ ) = 290 (3.63), 283 (3.67), 251 (4.15).

**ESI-HRMS**: calculated  $[\text{C}_{25}\text{H}_{27}\text{NO}_4\text{S}+\text{Na}]^+$ : 460.15530  
found: 460.15544 (0.30 ppm).

#### 3.12 (*E*)-3-((2-Methylcyclohex-2-en-1-ylidene)methyl)-1-tosyl-1*H*-indole (**S10**)

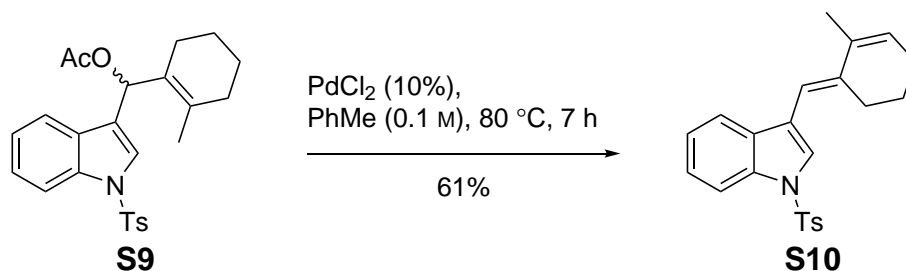

A solution of allylic acetate **S9** (219 mg, 500  $\mu\text{mol}$ , 1.00 eq.) and  $\text{PdCl}_2$  (9 mg, 50  $\mu\text{mol}$ , 0.1 eq.) in dry PhMe (5 mL) under argon was stirred for 7 h at 80  $^\circ\text{C}$ . Water was added and the mixture extracted with TBME (3x20 mL). The combined organic phases were washed with sat. NaCl, dried over  $\text{MgSO}_4$ , filtered and concentrated. Flash column chromatography on silica gel [petroleum ether/EtOAc (40:1)] afforded indole **S10** as a yellowish oil (116 mg, 307  $\mu\text{mol}$ , 61%).

**TLC** [petroleum ether/EtOAc (4:1)]:  $R_f$  = 0.78 [vanillin: brown].

**$^1\text{H}$  NMR** (400 MHz,  $\text{CDCl}_3$ , 2-methylcyclohex-2-en-1-ylidene moiety marked with \*):  $\delta$  [ppm] = 8.01 – 7.97 (m, 1 H, 7-*H*), 7.78 – 7.74 (m, 2 H, *o*- $\text{H}_{\text{Ts}}$ ), 7.58 – 7.54 (m, 1 H, 4-*H*), 7.51 (s, 1 H, 2-*H*), 7.32 (ddd,  $J$  = 7.7 Hz, 7.7 Hz, 1.2 Hz, 1 H, 6-*H*), 7.27 – 7.22 (m, 1 H, 5-*H*), 7.22 – 7.18 (m, 2 H, *m*- $\text{H}_{\text{Ts}}$ ), 6.40 (s, 1 H, 3- $\text{CH}=\text{1}^*$ ), 5.86 – 5.82 (m, 2 H, 3\*-*H*), 2.66 – 2.61 (m, 2 H, 6\*-*H*), 2.32 (s, 3 H, *p*- $\text{C}_{\text{Ts}}\text{-CH}_3$ ), 2.23 – 2.16 (m, 2 H, 4\*-*H*), 1.98 – 1.95 (m, 3 H, 2\*- $\text{CH}_3$ ), 1.78 – 1.68 (m, 2 H, 5\*-*H*).

**$^{13}\text{C}$  NMR** (101 MHz,  $\text{CDCl}_3$ , 2-methylcyclohex-2-en-1-ylidene moiety marked with \*):  $\delta$  [ppm] = 145.0 (1 C, *p*- $\text{C}_{\text{Ts}}$ ), 140.2 (1 C, *C*-1\*), 135.4 (1 C, *ipso*- $\text{C}_{\text{Ts}}$ ), 134.8 (1 C, *C*-7a), 133.4 (1 C, *C*-2\*), 131.5 (1 C, *C*-3a), 130.0 (2 C, *m*- $\text{C}_{\text{Ts}}$ ), 129.8 (1 C, *C*-3\*), 126.9 (2 C, *o*- $\text{C}_{\text{Ts}}$ ), 125.0 (1 C, *C*-6), 123.5 (1 C, *C*-2), 123.4 (1 C, *C*-5), 120.0 (1 C, *C*-3), 119.7 (1 C, *C*-4), 113.8 (1 C, *C*-7), 111.1 (1 C, 1- $\text{CH}=\text{1}^*$ ), 28.5 (1 C, *C*-6\*), 26.0 (1 C, *C*-4\*), 22.9 (1 C, *C*-5\*), 21.7 (1 C, *p*- $\text{C}_{\text{Ts}}\text{-CH}_3$ ), 20.3 (1 C, 2\*- $\text{CH}_3$ ).

**IR** (diamond ATR):  $\tilde{\nu}$  [ $\text{cm}^{-1}$ ] = 2928 (m), 2867 (w), 2867 (w), 1716 (w), 1667 (w), 1597 (w), 1545 (w), 1444 (m), 1365 (m), 1289 (m), 1216 (w), 1168 (s), 1127 (s), 1088 (m), 1025 (w), 970 (m), 870 (m), 805 (m), 748 (s), 707 (w), 664 (s), 568 (s).

**UV/Vis** (THF):  $\lambda_{\text{max}}$  ( $\lg \epsilon$ ) = 303 (4.03), 255 (4.24).

**ESI-HRMS**: calculated  $[\text{C}_{23}\text{H}_{23}\text{NO}_2\text{S}+\text{Na}]^+$ : 400.13417  
found: 400.13431 (0.35 ppm).

3.13 *cis*-Hydrindanone **8**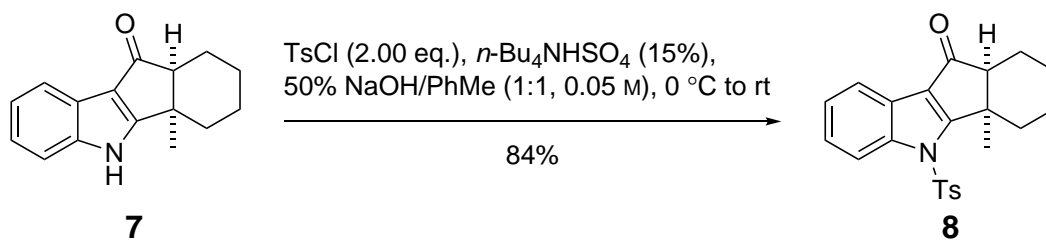

To a solution of indole **7** (947 mg, 3.96 mmol, 1.00 eq.) and  $n\text{-Bu}_4\text{NHSO}_4$  (202 mg, 594  $\mu\text{mol}$ , 0.15 eq.) in PhMe (40 mL) was added 50% NaOH (40 mL) and TsCl (1.51 mg, 7.91 mmol, 2.00 eq.) at 0 °C. The biphasic mixture was stirred rapidly for 2 h at room temperature. The mixture was diluted with water (100 mL) and extracted with TBME (3x100 mL). The combined organic phases were washed with sat. NaCl, dried over  $\text{MgSO}_4$ , filtered and concentrated. Flash column chromatography on silica gel [petroleum ether/EtOAc (10:1) to (5:1)] afforded tosylindole **8** as a colorless foam (1.31 g, 3.34 mmol, 84%).

**TLC** [petroleum ether/EtOAc (2:1)]:  $R_f = 0.69$  [vanillin: brown].

**$^1\text{H NMR}$**  (400 MHz,  $\text{CDCl}_3$ ):  $\delta$  [ppm] = 8.04 – 7.97 (m, 1 H, 6-*H*), 7.94 – 7.87 (m, 1 H, 9-*H*), 7.79 – 7.75 (m, 2 H, *o*- $\text{H}_{\text{Ts}}$ ), 7.37 – 7.29 (m, 2 H, 7-*H*, 8-*H*), 7.29 – 7.25 (m, 2 H, *m*- $\text{H}_{\text{Ts}}$ ), 2.72 (dd,  $J = 6.3 \text{ Hz, } 3.8 \text{ Hz}$ , 1 H, 10a-*H*), 2.38 (s, 3 H, *p*- $\text{C}_{\text{Ts}}\text{-CH}_3$ ), 2.32 (ddd,  $J = 13.8 \text{ Hz, } 6.8 \text{ Hz, } 3.8 \text{ Hz}$ , 1 H, 4-*H* (*syn* to 4a- $\text{CH}_3$ )), 2.21 (dddd,  $J = 13.9 \text{ Hz, } 4.4 \text{ Hz, } 4.4 \text{ Hz, } 4.4 \text{ Hz}$ , 1 H, 1-*H* (*syn* to 4a- $\text{CH}_3$ )), 1.85 (ddd,  $J = 13.8 \text{ Hz, } 9.8 \text{ Hz, } 4.1 \text{ Hz}$ , 1 H, 4-*H* (*anti* to 4a- $\text{CH}_3$ )), 1.81 – 1.70 (m, 4 H, 1-*H* (*anti* to 4a- $\text{CH}_3$ ), 4a- $\text{CH}_3$ ), 1.62 – 1.42 (m, 2 H, 2-*H* (*anti* to 4a- $\text{CH}_3$ ), 3-*H* (*syn* to 4a- $\text{CH}_3$ )), 1.41 – 1.23 (m, 2 H, 3-*H* (*anti* to 4a- $\text{CH}_3$ ), 2-*H* (*syn* to 4a- $\text{CH}_3$ )).

**$^{13}\text{C NMR}$**  (101 MHz,  $\text{CDCl}_3$ ):  $\delta$  [ppm] = 198.3 (1 C, C-10), 172.0 (1 C, C-4b), 145.8 (1 C, *p*- $\text{C}_{\text{Ts}}$ ), 141.1 (1 C, C-5a), 135.9 (1 C, *ipso*- $\text{C}_{\text{Ts}}$ ), 130.2 (2 C, *m*- $\text{C}_{\text{Ts}}$ ), 127.0 (2 C, *o*- $\text{C}_{\text{Ts}}$ ), 125.7 (1 C, C-7), 124.9 (1 C, C-8), 124.7 (1 C, C-9b), 122.2 (1 C, C-9a), 121.3 (1 C, C-9), 114.9 (1 C, C-6), 61.2 (1 C, C-10a), 43.5 (1 C, C-4a), 34.6 (1 C, C-4), 24.5 (1 C, 4a- $\text{CH}_3$ ), 21.8 (1 C, *p*- $\text{C}_{\text{Ts}}\text{-CH}_3$ ), 21.6 (1 C, C-1), 20.6 (1 C, C-2), 19.6 (1 C, C-3).

**IR** (diamond ATR):  $\tilde{\nu}$  [ $\text{cm}^{-1}$ ] = 2933 (w), 2858 (w), 1698 (m), 1593 (w), 1533 (w), 1476 (m), 1444 (m), 1410 (m), 1372 (m), 1318 (m), 1255 (m), 1176 (m), 1121 (m), 1081 (m), 1021 (m), 973 (m), 880 (w), 804 (m), 763 (m), 695 (w), 654 (m), 611 (w), 571 (m).

**UV/Vis** (THF):  $\lambda_{\text{max}}$  ( $\lg \epsilon$ ) = 271 (4.03), 224 (4.47).

**ESI-HRMS**: calculated [ $\text{C}_{23}\text{H}_{23}\text{NO}_3\text{S}+\text{H}$ ] $^+$ : 416.12909

found: 416.12918 (0.22 ppm).

3.14 4a-Methyl-5-tosyl-1,2,3,4,4a,5-hexahydroindeno[1,2-*b*]indole (**9**)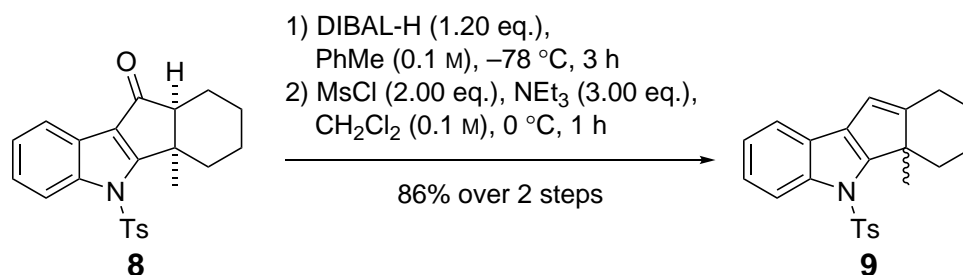

To a solution of *cis*-hydrindanone **8** (1.46 g, 3.71 mmol, 1.00 eq.) in dry PhMe (37 mL) under argon was added DIBAL-H (1.2 M in PhMe, 3.7 mL, 4.45 mmol, 1.20 eq.) dropwise at  $-78 \text{ }^\circ\text{C}$ .

### 3 Experimental procedures and analytical data

The solution was stirred for 3 h at  $-78\text{ }^{\circ}\text{C}$ . The reaction was quenched by the addition of MeOH at  $-78\text{ }^{\circ}\text{C}$ . Sat. potassium sodium tartrate solution was added at room temperature and the mixture rapidly stirred for 30 min. The phases were separated and the aqueous phase was extracted with TBME (3x50 mL). The combined organic phases were washed with sat. NaCl, dried over  $\text{MgSO}_4$ , filtered and concentrated.

To a solution of the crude product in  $\text{CH}_2\text{Cl}_2$  (37 mL) was added  $\text{NEt}_3$  (1.6 mL, 11.1 mmol, 3.00 eq.) and MsCl (570  $\mu\text{L}$ , 7.42 mmol, 2.00 eq.) at  $0\text{ }^{\circ}\text{C}$ . The solution was stirred for 1 h at  $0\text{ }^{\circ}\text{C}$ . The reaction was quenched by the addition of sat.  $\text{NaHCO}_3$ . The phases were separated and the aqueous phase was extracted with  $\text{CH}_2\text{Cl}_2$  (3x50 mL). The combined organic phases were dried over  $\text{MgSO}_4$ , filtered and concentrated. Flash column chromatography on silica gel [petroleum ether/EtOAc (20:1)] afforded alkene **9** as a colorless foam (1.21 g, 3.21 mmol, 86% over 2 steps).

**TLC** [petroleum ether/EtOAc (10:1)]:  $R_f = 0.18$  [vanillin: brown].

**$^1\text{H NMR}$**  (400 MHz,  $\text{CDCl}_3$ ):  $\delta$  [ppm] = 8.09 – 8.03 (m, 1 H, 6-*H*), 7.67 – 7.63 (m, 2 H, *o*- $H_{\text{Ts}}$ ), 7.52 – 7.47 (m, 1 H, 9-*H*), 7.26 – 7.19 (m, 2 H, 7-*H*, 8-*H*), 7.17 – 7.12 (m, 2 H, *m*- $H_{\text{Ts}}$ ), 6.31 (d,  $J = 1.9\text{ Hz}$ , 1 H, 10-*H*), 2.91 – 2.84 (m, 1 H, 4-*H* (*syn* to 4a- $\text{CH}_3$ )), 2.69 – 2.62 (m, 1 H, 1-*H* (*anti* to 4a- $\text{CH}_3$ )), 2.37 – 2.27 (m, 1 H, 1-*H* (*syn* to 4a- $\text{CH}_3$ )), 2.30 (s, 3 H, *p*- $\text{C}_{\text{Ts}}\text{-CH}_3$ ), 2.02 – 1.93 (m, 1 H, 2-*H* (*syn* to 4a- $\text{CH}_3$ )), 1.72 – 1.62 (m, 2 H, 3-*H*), 1.46 (s, 3 H, 4a- $\text{CH}_3$ ), 1.32 – 1.11 (m, 2 H, 2-*H* (*anti* to 4a- $\text{CH}_3$ ), 4-*H* (*anti* to 4a- $\text{CH}_3$ )).

**$^{13}\text{C NMR}$**  (101 MHz,  $\text{CDCl}_3$ ):  $\delta$  [ppm] = 156.5 (1 C, C-10a), 153.0 (1 C, C-4b), 144.5 (1 C, *p*- $\text{C}_{\text{Ts}}$ ), 140.4 (1 C, C-5a), 136.0 (1 C, *ipso*- $\text{C}_{\text{Ts}}$ ), 129.7 (2 C, *m*- $\text{C}_{\text{Ts}}$ ), 129.4 (1 C, C-9b), 126.8 (2 C, *o*- $\text{C}_{\text{Ts}}$ ), 125.0 (1 C, C-9a), 123.7 (1 C, C-7), 123.6 (1 C, C-8), 119.6 (1 C, C-9), 115.3 (1 C, C-6), 112.6 (1 C, C-10), 50.5 (1 C, C-4a), 36.0 (1 C, C-4), 29.1 (1 C, C-2), 27.8 (1 C, C-1), 21.6 (1 C, *p*- $\text{C}_{\text{Ts}}\text{-CH}_3$ ), 19.5 (1 C, 4a- $\text{CH}_3$ ).

**IR** (diamond ATR):  $\tilde{\nu}$  [ $\text{cm}^{-1}$ ] = 3058 (w), 2929 (m), 2854 (m), 1596 (w), 1488 (w), 1444 (m), 1363 (s), 1307 (m), 1268 (w), 1218 (m), 1167 (s), 1121 (m), 1121 (m), 1086 (m), 1017 (w), 980 (m), 864 (m), 842 (m), 811 (m), 747 (s), 705 (w), 662 (s), 601 (w), 566 (m), 541 (m).

**UV/Vis** (THF):  $\lambda_{\text{max}}$  ( $\lg \epsilon$ ) = 311 (3.62), 268 (3.91), 228 (4.61).

**ESI-HRMS**: calculated [ $\text{C}_{23}\text{H}_{23}\text{NO}_2\text{S}+\text{Na}$ ] $^+$ : 400.13417  
found: 400.13418 (0.02 ppm).

#### 3.15 Bromohydrin **10**

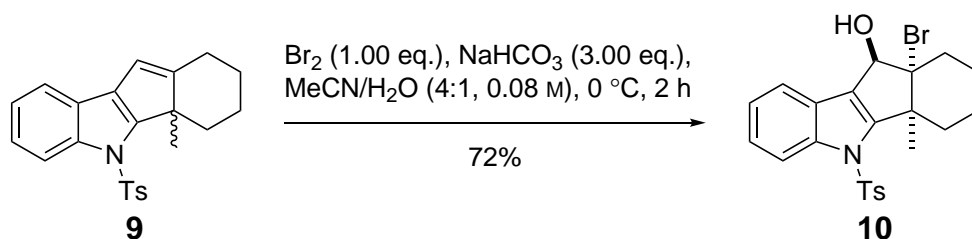

To a solution of alkene **9** (38 mg, 100  $\mu\text{mol}$ , 1.00 eq.) and  $\text{NaHCO}_3$  (25 mg, 300  $\mu\text{mol}$ , 3.00 eq.) in MeCN (1.0 mL) and  $\text{H}_2\text{O}$  (250  $\mu\text{L}$ ) was added  $\text{Br}_2$  (1 M in *n*-heptane, 100  $\mu\text{L}$ , 100  $\mu\text{mol}$ , 1.00 eq.) dropwise at  $0\text{ }^{\circ}\text{C}$ . The solution was stirred for 2 h at  $0\text{ }^{\circ}\text{C}$ . The reaction was quenched by the addition of sat.  $\text{Na}_2\text{SO}_3$ . The phases were separated and the aqueous phase was extracted with TBME (3x50 mL). The combined organic phases were washed with sat. NaCl, dried

### 3 Experimental procedures and analytical data

over  $\text{MgSO}_4$ , filtered and concentrated. Flash column chromatography on silica gel [petroleum ether/EtOAc (10:1) to (8:1)] afforded bromohydrin **10** as a colorless foam (34 mg, 72  $\mu\text{mol}$ , 72%).

**TLC** [petroleum ether/EtOAc (4:1)]:  $R_f = 0.53$  [vanillin: brown].

**$^1\text{H NMR}$**  (400 MHz,  $\text{C}_6\text{D}_6$ ):  $\delta$  [ppm] = 8.47 – 8.43 (m, 1 H, 6-*H*), 7.66 – 7.61 (m, 1 H, 9-*H*), 7.58 – 7.53 (m, 2 H, *o*- $\text{H}_{\text{Ts}}$ ), 7.15 – 7.07 (m, 2 H, 7-*H*, 8-*H*), 6.48 – 6.43 (m, 2 H, *m*- $\text{H}_{\text{Ts}}$ ), 5.30 (d,  $J = 6.1$  Hz, 1 H, 10-*H*), 2.94 – 2.84 (m, 1 H, 4-*H* (*anti* to 4a- $\text{CH}_3$ )), 2.20 – 2.11 (m, 1 H, 1-*H* (*anti* to 4a- $\text{CH}_3$ )), 1.79 – 1.67 (m, 2 H, 1-*H* (*syn* to 4a- $\text{CH}_3$ ), 4-*H* (*syn* to 4a- $\text{CH}_3$ )), 1.66 (s, 3 H, *p*- $\text{C}_{\text{Ts}}$ - $\text{CH}_3$ ), 1.62 (s, 3 H, 4a- $\text{CH}_3$ ), 1.61 – 1.49 (m, 2 H, 10-*OH*, 3-*H*), 1.36 – 1.22 (m, 2 H, 2-*H*, 3-*H*), 0.76 – 0.62 (m, 1 H, 2-*H*).

**$^{13}\text{C NMR}$**  (101 MHz,  $\text{C}_6\text{D}_6$ ):  $\delta$  [ppm] = 146.7 (1 C, C-4b), 144.5 (1 C, *p*- $\text{C}_{\text{Ts}}$ ), 141.2 (1 C, C-5a), 137.4 (1 C, *ipso*- $\text{C}_{\text{Ts}}$ ), 129.8 (2 C, *m*- $\text{C}_{\text{Ts}}$ ), 126.6 (2 C, *o*- $\text{C}_{\text{Ts}}$ ), 126.5 (1 C, C-9a), 125.9 (1 C, C-9b), 124.8 (1 C, C-7), 124.0 (1 C, C-8), 120.1 (1 C, C-9), 115.7 (1 C, C-6), 84.1 (1 C, C-10a), 79.8 (1 C, C-10), 51.6 (1 C, C-4a), 34.8 (1 C, C-1), 33.0 (1 C, C-4), 27.7 (1 C, 4a- $\text{CH}_3$ ), 23.0 (1 C, C-2), 22.7 (1 C, C-3), 21.0 (1 C, *p*- $\text{C}_{\text{Ts}}$ - $\text{CH}_3$ ).

**IR** (diamond ATR):  $\tilde{\nu}$  [ $\text{cm}^{-1}$ ] = 3533 (br. s), 3410 (w), 2929 (m), 2861 (w), 1594 (w), 1482 (w), 1444 (m), 1362 (m), 1304 (m), 1218 (w), 1174 (s), 1081 (m), 1023 (m), 985 (m), 931 (w), 856 (w), 810 (m), 749 (s), 711 (m), 662 (s), 613 (w), 570 (s).

**UV/Vis** (THF):  $\lambda_{\text{max}}$  ( $\lg \epsilon$ ) = 259 (4.18), 226 (4.42).

**ESI-HRMS**: calculated [ $\text{C}_{23}\text{H}_{24}\text{BrNO}_3\text{S}+\text{Na}$ ] $^+$ : 496.05525  
found: 496.05528 (0.06 ppm).

### 3.16 Cyclobutane **11**

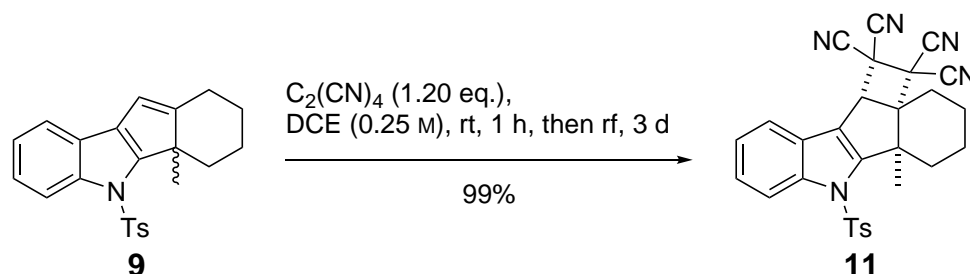

A solution of alkene **9** (38 mg, 100  $\mu\text{mol}$ , 1.00 eq.) and tetracyanoethene (16 mg, 120  $\mu\text{mol}$ , 1.20 eq.) in DCE (400  $\mu\text{L}$ ) was stirred at room temperature for 1 h and under reflux for 3 d. The mixture was concentrated. Flash column chromatography on silica gel [petroleum ether/EtOAc (20:1) to (15:1) to (10:1) to (8:1) to (6:1) to (4:1)] afforded cyclobutane **11** as a solid (50 mg, 99  $\mu\text{mol}$ , 99%).

**TLC** [petroleum ether/EtOAc (4:1)]:  $R_f = 0.54$  [vanillin: brown].

**$^1\text{H NMR}$**  (400 MHz,  $\text{CDCl}_3$ ):  $\delta$  [ppm] = 8.04 – 8.00 (m, 1 H, 8-*H*), 7.88 – 7.83 (m, 2 H, *o*- $\text{H}_{\text{Ts}}$ ), 7.62 – 7.58 (m, 1 H, 11-*H*), 7.39 – 7.30 (m, 2 H, 9-*H*, 10-*H*), 7.29 – 7.25 (m, 2 H, *m*- $\text{H}_{\text{Ts}}$ ), 4.36 (s, 1 H, 11c-*H*), 2.74 – 2.60 (m, 2 H, 3-*H* (*anti* to 6a- $\text{CH}_3$ ), 6-*H* (*syn* to 6a- $\text{CH}_3$ )), 2.38 (s, 3 H, *p*- $\text{C}_{\text{Ts}}$ - $\text{CH}_3$ ), 2.24 – 2.13 (m, 1 H, 3-*H* (*syn* to 6a- $\text{CH}_3$ )), 2.06 – 1.96 (m, 1 H, 4-*H* (*syn* to 6a- $\text{CH}_3$ )), 1.87 (s, 3 H, 6a- $\text{CH}_3$ ), 1.68 – 1.51 (m, 1 H, 5-*H* (*anti* to 6a- $\text{CH}_3$ )), 1.48 – 1.37 (m, 2 H, 4-*H* (*anti* to 6a- $\text{CH}_3$ ), 5-*H* (*syn* to 6a- $\text{CH}_3$ )), 1.32 – 1.20 (m, 1 H, 6-*H* (*anti* to 6a- $\text{CH}_3$ )).

**$^{13}\text{C NMR}$**  (101 MHz,  $\text{CDCl}_3$ ):  $\delta$  [ppm] = 153.8 (1 C, C-6b), 146.0 (1 C, *p*- $\text{C}_{\text{Ts}}$ ), 140.6 (1 C, C-7a), 135.5 (1 C, *ipso*- $\text{C}_{\text{Ts}}$ ), 130.3 (2 C, *m*- $\text{C}_{\text{Ts}}$ ), 127.2 (2 C, *o*- $\text{C}_{\text{Ts}}$ ), 125.8 (1 C, C-9), 124.4 (1 C, C-10), 124.0 (1 C, C-11a), 120.0 (1 C, C-11), 116.3 (1 C, C-11b), 115.0 (1 C, C-8), 111.9 (1 C,



### 3 Experimental procedures and analytical data

1-CN), 110.5 (1 C, 2-CN), 110.0 (1 C, 2-CN), 109.4 (1 C, 1-CN), 67.6 (1 C, C-2a), 49.0 (1 C, C-11c), 48.6 (1 C, C-6a), 44.4 (1 C, C-2), 41.0 (1 C, C-6), 36.8 (1 C, C-1), 29.3 (1 C, C-3), 22.6 (1 C, C-4), 21.8 (1 C, *p*-C<sub>TS</sub>-CH<sub>3</sub>), 20.0 (1 C, C-5), 16.2 (1 C, 6a-CH<sub>3</sub>).

**IR** (diamond ATR):  $\tilde{\nu}$  [cm<sup>-1</sup>] = 2940 (m), 2863 (w), 1596 (w), 1548 (w), 1446 (m), 1367 (m), 1322 (m), 1254 (m), 1226 (w), 1175 (s), 1115 (m), 1086 (m), 1026 (m), 982 (m), 906 (m), 864 (w), 842 (w), 806 (m), 737 (s), 666 (s), 571 (s).

**UV/Vis** (THF):  $\lambda_{\max}$  (lg  $\epsilon$ ) = 258 (4.10).

**ESI-HRMS**: calculated [C<sub>29</sub>H<sub>23</sub>N<sub>5</sub>O<sub>2</sub>S+Na]<sup>+</sup>: 528.14647  
found: 528.14659 (0.23 ppm).

#### 3.17 Diol **14**

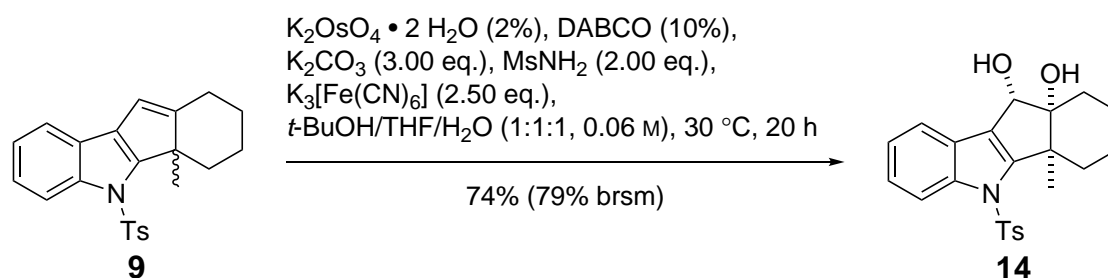

To a solution of alkene **9** (1.28 g, 3.40 mmol, 1.00 eq.), DABCO (38 mg, 340  $\mu$ mol, 0.10 eq.) and MsNH<sub>2</sub> (647 mg, 6.80 mmol, 2.00 eq.) in *t*-BuOH (20 mL), THF (20 mL) and H<sub>2</sub>O (20 mL) was added K<sub>2</sub>CO<sub>3</sub> (1.41 g, 10.2 mmol, 3.00 eq.), K<sub>3</sub>[Fe(CN)<sub>6</sub>] (2.80 g, 8.50 mmol, 2.50 eq.) and K<sub>2</sub>OsO<sub>4</sub> · 2 H<sub>2</sub>O (25 mg, 68  $\mu$ mol, 0.02 eq.). The mixture was stirred rapidly for 20 h at 30 °C. The reaction was quenched by the addition of sat. Na<sub>2</sub>SO<sub>3</sub>. The phases were separated and the aqueous phase was extracted with TBME (3x100 mL). The combined organic phases were washed with sat. NaCl, dried over MgSO<sub>4</sub>, filtered and concentrated. Flash column chromatography on silica gel [petroleum ether/EtOAc (10:1) to (4:1) to (3:1) to (2:1)] afforded diol **14** (1.04 g, 2.51 mmol, 74%) as a colorless foam and unreacted alkene **9** (70 mg, 189  $\mu$ mol, 5%) as a colorless foam.

**TLC** [petroleum ether/EtOAc (2:1)]:  $R_f$  = 0.29 [vanillin: brown].

**<sup>1</sup>H NMR** (600 MHz, C<sub>6</sub>D<sub>6</sub>):  $\delta$  [ppm] = 8.44 – 8.42 (m, 1 H, 6-*H*), 7.69 – 7.67 (m, 1 H, 9-*H*), 7.66 – 7.63 (m, 2 H, *o*-H<sub>TS</sub>), 7.18 – 7.14 (m, 1 H, 7-*H*), 7.14 – 7.11 (m, 1 H, 8-*H*), 6.48 – 6.45 (m, 2 H, *m*-H<sub>TS</sub>), 4.66 (d,  $J$  = 8.0 Hz, 1 H, 10-*H*), 2.35 – 2.29 (m, 1 H, 4-*H* (*syn* to 4a-CH<sub>3</sub>)), 2.12 (d,  $J$  = 8.4 Hz, 1 H, 10-OH), 1.96 (s, 1 H, 10a-OH), 1.65 (s, 3 H, *p*-C<sub>TS</sub>-CH<sub>3</sub>), 1.64 – 1.59 (m, 1 H, 1-*H* (*anti* to 4a-CH<sub>3</sub>)), 1.63 (s, 3 H, 4a-CH<sub>3</sub>), 1.49 – 1.42 (m, 2 H, 2-*H*, 4-*H* (*anti* to 4a-CH<sub>3</sub>)), 1.36 (ddd,  $J$  = 13.9 Hz, 10.6 Hz, 4.4 Hz, 1 H, 1-*H* (*syn* to 4a-CH<sub>3</sub>)), 1.27 – 1.19 (m, 1 H, 3-*H* (*syn* to 4a-CH<sub>3</sub>)), 1.12 – 1.03 (m, 2 H, 2-*H*, 3-*H* (*anti* to 4a-CH<sub>3</sub>)).

**<sup>13</sup>C NMR** (151 MHz, C<sub>6</sub>D<sub>6</sub>):  $\delta$  [ppm] = 151.1 (1 C, C-4b), 144.3 (1 C, *p*-C<sub>TS</sub>), 141.0 (1 C, C-5a), 137.5 (1 C, *ipso*-C<sub>TS</sub>), 129.7 (2 C, *m*-C<sub>TS</sub>), 127.2 (1 C, C-9a), 126.6 (2 C, *o*-C<sub>TS</sub>), 124.8 (1 C, C-9b), 124.5 (1 C, C-7), 124.0 (1 C, C-8), 120.0 (1 C, C-9), 115.6 (1 C, C-6), 85.9 (1 C, C-10a), 72.1 (1 C, C-10), 49.4 (1 C, C-4a), 37.1 (1 C, C-4), 31.5 (1 C, C-1), 22.8 (1 C, C-2), 21.2 (1 C, C-3), 21.0 (1 C, *p*-C<sub>TS</sub>-CH<sub>3</sub>), 20.5 (1 C, 4a-CH<sub>3</sub>).

**IR** (diamond ATR):  $\tilde{\nu}$  [cm<sup>-1</sup>] = 3382 (br. s), 2931 (m), 2862 (w), 1595 (w), 1480 (w), 1447 (m), 1362 (m), 1308 (w), 1219 (w), 1174 (m), 1122 (w), 1055 (m), 984 (m), 936 (w), 892 (w), 812 (m), 750 (m), 711 (m), 661 (s), 624 (m), 572 (m).

### 3 Experimental procedures and analytical data

**UV/Vis** (THF):  $\lambda_{\max}$  ( $\lg \epsilon$ ) = 258 (4.16), 222 (4.46).

**ESI-HRMS**: calculated  $[\text{C}_{23}\text{H}_{25}\text{NO}_4\text{S}+\text{Na}]^+$ : 434.13965  
found: 434.13980 (0.35 ppm).

#### 3.18 Sulfite 16

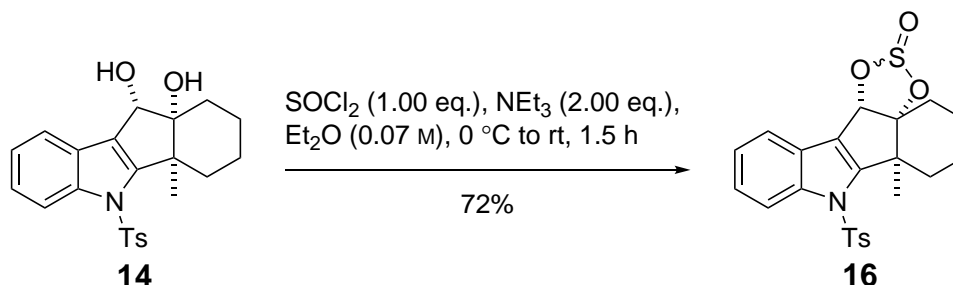

To a solution of diol **14** (142 mg, 357  $\mu\text{mol}$ , 1.00 eq.) and  $\text{NEt}_3$  (100  $\mu\text{L}$ , 714  $\mu\text{mol}$ , 2.00 eq.) in  $\text{Et}_2\text{O}$  (1.8 mL) was added a solution of  $\text{SOCl}_2$  (26  $\mu\text{L}$ , 357 mmol, 1.00 eq.) in  $\text{Et}_2\text{O}$  (3.6 mL) dropwise at 0 °C. The mixture was stirred for 1.5 h at room temperature. The reaction was quenched by the addition of  $\text{H}_2\text{O}$  and the mixture extracted with TBME (3x10 mL). The combined organic phases were washed with sat.  $\text{NaCl}$ , dried over  $\text{MgSO}_4$ , filtered and concentrated. Flash column chromatography on silica gel [petroleum ether/ $\text{EtOAc}$  (15:1) to (10:1)] afforded a mixture (4:3) of diastereomeric sulfites **16** as a colorless solid (34 mg, 72  $\mu\text{mol}$ , 72%)

**TLC** [petroleum ether/ $\text{EtOAc}$  (10:1)]:  $R_f$  = 0.49 [vanillin: brown].

**$^1\text{H NMR}$**  (400 MHz,  $\text{CDCl}_3$ , major diastereomer):  $\delta$  [ppm] = 8.08 – 8.02 (m, 1 H, 9-*H*), 7.72 – 7.67 (m, 2 H, *o*- $\text{H}_{\text{Ts}}$ ), 7.62 – 7.55 (m, 1 H, 12-*H*), 7.35 – 7.22 (m, 4 H, 10-*H*, 11-*H*, *m*- $\text{H}_{\text{Ts}}$ ), 6.08 (s, 1 H, 12c-*H*), 2.61 – 2.45 (m, 2 H, 4-*H*, 7-*H*), 2.37 (s, 3 H, *p*- $\text{C}_{\text{Ts}}\text{-CH}_3$ ), 2.24 – 2.15 (m, 1 H, 4-*H*), 1.95 – 1.82 (m, 1 H, 5-*H*), 1.67 (s, 3 H, 7a- $\text{CH}_3$ ), 1.63 – 1.32 (m, 4 H, 5-*H*, 6-*H*, 7-*H*).

**$^{13}\text{C NMR}$**  (101 MHz,  $\text{CDCl}_3$ , major diastereomer):  $\delta$  [ppm] = 151.4 (1 C, C-7b), 145.4 (1 C, *p*- $\text{C}_{\text{Ts}}$ ), 140.5 (1 C, C-8a), 136.2 (1 C, *ipso*- $\text{C}_{\text{Ts}}$ ), 130.1 (2 C, *m*- $\text{C}_{\text{Ts}}$ ), 126.7 (2 C, *o*- $\text{C}_{\text{Ts}}$ ), 125.0 (1 C, C-10), 124.7 (1 C, C-12a), 124.2 (1 C, C-11), 120.0 (1 C, C-12b), 119.5 (1 C, C-12), 115.2 (1 C, C-9), 105.4 (1 C, C-3a), 84.1 (1 C, C-12c), 49.7 (1 C, C-7a), 38.5 (1 C, C-7), 32.6 (1 C, C-4), 22.8 (1 C, C-5), 21.7 (1 C, *p*- $\text{C}_{\text{Ts}}\text{-CH}_3$ ), 19.30 (1 C, C-6), 19.29 (1 C, 7a- $\text{CH}_3$ ).

**$^1\text{H NMR}$**  (400 MHz,  $\text{CDCl}_3$ , minor diastereomer):  $\delta$  [ppm] = 8.02 – 7.96 (m, 1 H, 9-*H*), 7.62 – 7.55 (m, 1 H, 12-*H*), 7.54 – 7.49 (m, 2 H, *o*- $\text{H}_{\text{Ts}}$ ), 7.35 – 7.22 (m, 2 H, 10-*H*, 11-*H*), 7.21 – 7.17 (m, 2 H, *m*- $\text{H}_{\text{Ts}}$ ), 5.81 (s, 1 H, 12c-*H*), 2.61 – 2.45 (m, 1 H, 7-*H*), 2.33 (s, 3 H, *p*- $\text{C}_{\text{Ts}}\text{-CH}_3$ ), 2.03 – 1.96 (m, 2 H, 4-*H*), 1.95 – 1.82 (m, 1 H, 5-*H*), 1.64 (s, 3 H, 7a- $\text{CH}_3$ ), 1.63 – 1.32 (m, 4 H, 5-*H*, 6-*H*, 7-*H*).

**$^{13}\text{C NMR}$**  (101 MHz,  $\text{CDCl}_3$ , minor diastereomer):  $\delta$  [ppm] = 150.6 (1 C, C-7b), 144.9 (1 C, *p*- $\text{C}_{\text{Ts}}$ ), 141.1 (1 C, C-8a), 136.7 (1 C, *ipso*- $\text{C}_{\text{Ts}}$ ), 130.1 (2 C, *m*- $\text{C}_{\text{Ts}}$ ), 126.2 (2 C, *o*- $\text{C}_{\text{Ts}}$ ), 125.0 (1 C, C-10), 124.6 (1 C, C-12a), 124.3 (1 C, C-11), 122.4 (1 C, C-12b), 119.6 (1 C, C-12), 115.2 (1 C, C-9), 108.6 (1 C, C-3a), 82.9 (1 C, C-12c), 49.8 (1 C, C-7a), 39.2 (1 C, C-7), 31.0 (1 C, C-4), 22.7 (1 C, C-5), 21.7 (1 C, *p*- $\text{C}_{\text{Ts}}\text{-CH}_3$ ), 19.5 (1 C, C-6), 19.4 (1 C, 7a- $\text{CH}_3$ ).

**IR** (diamond ATR):  $\tilde{\nu}$  [ $\text{cm}^{-1}$ ] = 2932 (w), 2861 (w), 1596 (w), 1479 (w), 1447 (m), 1369 (m), 1315 (w), 1260 (w), 1217 (m), 1177 (s), 1122 (m), 1084 (m), 1031 (w), 984 (m), 941 (m), 840 (m), 802 (m), 745 (m), 711 (m), 652 (s), 568 (s).

**UV/Vis** (THF):  $\lambda_{\max}$  ( $\lg \epsilon$ ) = 289 (3.40), 255 (4.16), 221 (4.50).

### 3 Experimental procedures and analytical data

**ESI-HRMS:** calculated  $[\text{C}_{23}\text{H}_{23}\text{NO}_5\text{S}_2+\text{Na}]^+$ : 480.09099  
found: 480.09149 (1.04 ppm).

#### 3.19 Ketone **17**

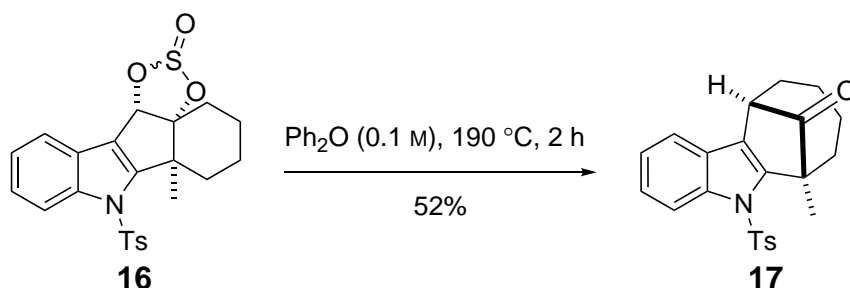

A solution of sulfite **16** (76 mg, 166  $\mu\text{mol}$ ) in  $\text{Ph}_2\text{O}$  (1.7 mL) was stirred for 2 h at 190  $^\circ\text{C}$ . Flash column chromatography on silica gel [petroleum ether to petroleum ether/EtOAc (20:1) to (15:1)] afforded ketone **17** as an off-white solid (34 mg, 86  $\mu\text{mol}$ , 52%).

**TLC** [petroleum ether/EtOAc (10:1)]:  $R_f = 0.50$  [vanillin: brown].

**$^1\text{H NMR}$**  (400 MHz,  $\text{CDCl}_3$ ):  $\delta$  [ppm] = 8.21 – 8.16 (m, 1 H, 4-*H*), 7.72 – 7.66 (m, 2 H, *o*- $H_{\text{Ts}}$ ), 7.47 – 7.43 (m, 1 H, 1-*H*), 7.35 (ddd,  $J = 8.4$  Hz, 7.2 Hz, 1.3 Hz, 1 H, 3-*H*), 7.29 (ddd,  $J = 7.5$  Hz, 7.5 Hz, 0.8 Hz, 1 H, 2-*H*), 7.23 – 7.18 (m, 2 H, *m*- $H_{\text{Ts}}$ ), 3.70 (dd,  $J = 7.0$  Hz, 1.5 Hz, 1 H, 11-*H*), 2.40 – 2.31 (m, 4 H, 7-*H*, *p*- $\text{C}_{\text{Ts}}\text{-CH}_3$ ), 2.05 – 1.95 (m, 1 H, 10-*H*), 1.71 – 1.63 (m, 1 H, 10-*H*), 1.62 (s, 3 H, 6- $\text{CH}_3$ ), 1.55 – 1.38 (m, 4 H, 7-*H*, 8-*H*, 9-*H*), 1.37 – 1.27 (m, 1 H, 9-*H*), 1.03 – 0.90 (m, 1 H, 8-*H*).

**$^{13}\text{C NMR}$**  (101 MHz,  $\text{CDCl}_3$ ):  $\delta$  [ppm] = 215.4 (1 C, C-12), 145.1 (1 C, *p*- $\text{C}_{\text{Ts}}$ ), 143.0 (1 C, C-5a), 139.3 (1 C, C-4a), 136.5 (1 C, *ipso*- $\text{C}_{\text{Ts}}$ ), 130.0 (2 C, *m*- $\text{C}_{\text{Ts}}$ ), 126.7 (2 C, *o*- $\text{C}_{\text{Ts}}$ ), 125.6 (1 C, C-11a), 125.5 (1 C, C-11b), 125.0 (1 C, C-3), 123.9 (1 C, C-2), 119.5 (1 C, C-1), 115.2 (1 C, C-4), 55.4 (1 C, C-6), 46.7 (1 C, C-11), 38.9 (1 C, C-7), 27.6 (1 C, C-10), 25.7 (1 C, C-9), 24.7 (1 C, C-8), 21.7 (1 C, *p*- $\text{C}_{\text{Ts}}\text{-CH}_3$ ), 19.7 (1 C, 6- $\text{CH}_3$ ).

**IR** (diamond ATR):  $\tilde{\nu}$  [ $\text{cm}^{-1}$ ] = 2928 (w), 2854 (w), 1752 (m), 1594 (w), 1483 (w), 1445 (m), 1363 (m), 1316 (w), 1257 (w), 1217 (m), 1166 (s), 1084 (m), 1026 (m), 981 (m), 935 (w), 871 (m), 840 (w), 805 (w), 750 (m), 710 (m), 660 (s), 630 (m), 570 (m), 548 (w).

**UV/Vis** (THF):  $\lambda_{\text{max}}$  ( $\lg \epsilon$ ) = 264 (4.15), 221 (4.44).

**ESI-HRMS:** calculated  $[\text{C}_{23}\text{H}_{23}\text{NO}_3\text{S}+\text{Na}]^+$ : 416.12909  
found: 416.12924 (0.36 ppm).

#### 3.20 Diol **18**

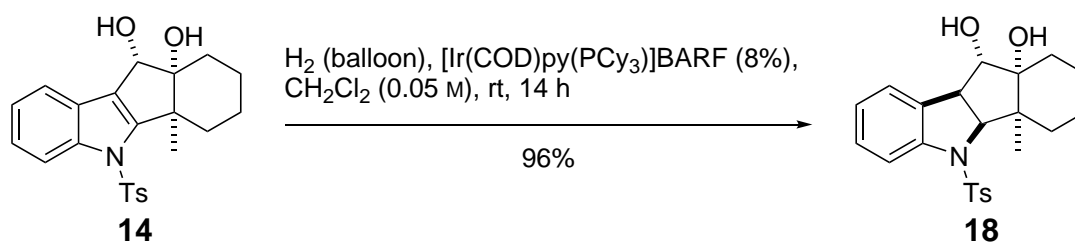

A solution of diol **14** (264 mg, 642  $\mu\text{mol}$ , 1.00 eq.) and  $[\text{Ir}(\text{COD})\text{py}(\text{PCy}_3)]\text{BARF}$  (78 mg, 51  $\mu\text{mol}$ , 0.08 eq.) in dry  $\text{CH}_2\text{Cl}_2$  (13 mL) under argon was degassed (three freeze-pump-thaw cycles) and back filled with  $\text{H}_2$ . The solution was stirred for 14 h at room temperature under  $\text{H}_2$  and

### 3 Experimental procedures and analytical data

concentrated afterwards. Flash column chromatography on silica gel [petroleum ether/EtOAc (2:1) to (1:2)] afforded indoline **18** as a colorless foam (254 mg, 614  $\mu$ mol, 96%).

**TLC** [petroleum ether/EtOAc (1:1)]:  $R_f$  = 0.46 [vanillin: brown].

**$^1\text{H NMR}$**  (400 MHz,  $\text{C}_6\text{D}_6$ ):  $\delta$  [ppm] = 8.09 (d,  $J$  = 8.1 Hz, 1 H, 6-*H*), 7.61 – 7.56 (m, 2 H, *o*- $H_{\text{Ts}}$ ), 7.18 – 7.14 (m, 1 H, 9-*H*), 7.08 – 7.01 (m, 1 H, 7-*H*), 6.83 (ddd,  $J$  = 7.5 Hz, 7.5 Hz, 1.1 Hz, 1 H, 8-*H*), 6.52 – 6.47 (m, 2 H, *m*- $H_{\text{Ts}}$ ), 4.79 (d,  $J$  = 11.0 Hz, 1 H, 4b-*H*), 3.99 (dd,  $J$  = 5.7 Hz, 5.7 Hz, 1 H, 10-*H*), 3.34 (dd,  $J$  = 11.0 Hz, 6.2 Hz, 1 H, 9b-*H*), 1.93 (d,  $J$  = 6.8 Hz, 1 H, 10-*OH*), 1.85 – 1.76 (m, 1 H, 4-*H* (*syn* to 4a- $\text{CH}_3$ )), 1.68 (s, 3 H, *p*- $\text{C}_{\text{Ts}}\text{-CH}_3$ ), 1.62 (s, 1 H, 10a-*H*), 1.57 (s, 3 H, 4a- $\text{CH}_3$ ), 1.46 – 1.39 (m, 1 H, 1-*H* (*syn* to 4a- $\text{CH}_3$ )), 1.24 – 1.15 (m, 1 H, 3-*H*), 1.12 – 0.99 (m, 3 H, 1-*H* (*anti* to 4a- $\text{CH}_3$ ), 2-*H*), 0.86 – 0.67 (m, 2 H, 3-*H*, 4-*H* (*anti* to 4a- $\text{CH}_3$ )).

**$^{13}\text{C NMR}$**  (101 MHz,  $\text{C}_6\text{D}_6$ ):  $\delta$  [ppm] = 143.9 (1 C, C-5a), 143.4 (1 C, *p*- $\text{C}_{\text{Ts}}$ ), 137.3 (1 C, C-9a), 135.5 (1 C, *ipso*- $\text{C}_{\text{Ts}}$ ), 129.6 (2 C, *m*- $\text{C}_{\text{Ts}}$ ), 128.4 (1 C, C-7), 127.6 (2 C, *o*- $\text{C}_{\text{Ts}}$ ), 125.1 (1 C, C-8), 124.1 (1 C, C-9), 117.7 (1 C, C-6), 81.8 (1 C, C-10a), 79.5 (1 C, C-10), 75.4 (1 C, C-4b), 51.4 (1 C, C-9b), 48.1 (1 C, C-4a), 31.2 (1 C, C-3), 29.8 (1 C, C-1), 22.9 (1 C, C-3), 21.1 (1 C, C-2), 21.0 (1 C, *p*- $\text{C}_{\text{Ts}}\text{-CH}_3$ ), 18.4 (1 C, 4a- $\text{CH}_3$ ).

**IR** (diamond ATR):  $\tilde{\nu}$  [ $\text{cm}^{-1}$ ] = 3489 (br. s), 2932 (w), 2863 (w), 1725 (w), 1597 (w), 1464 (w), 1401 (w), 1344 (m), 1241 (w), 1161 (m), 1079 (m), 1033 (m), 968 (m), 858 (w), 812 (m), 758 (m), 701 (m), 658 (m), 618 (w), 574 (m), 545 (w).

**UV/Vis** (THF):  $\lambda_{\text{max}}$  (lg  $\epsilon$ ) = 285 (3.59), 257 (3.85), 221 (4.28).

**ESI-HRMS**: calculated [ $\text{C}_{23}\text{H}_{27}\text{NO}_4\text{S}+\text{Na}$ ] $^+$ : 436.15530

found: 436.15549 (0.44 ppm).

#### 3.21 Sulfite **19**

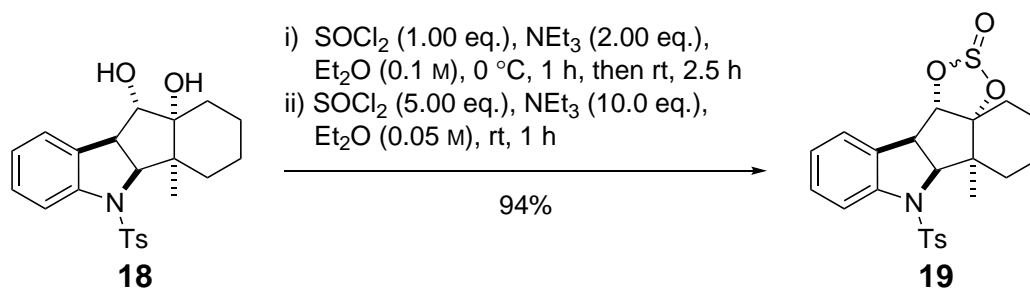

To a solution of diol **18** (62 mg, 150  $\mu$ mol, 1.00 eq.) and  $\text{NEt}_3$  (21  $\mu$ L, 300  $\mu$ mol, 2.00 eq.) in  $\text{Et}_2\text{O}$  (750  $\mu$ L) was added a solution of  $\text{SOCl}_2$  (11  $\mu$ L, 150  $\mu$ mol, 1.00 eq.) in  $\text{Et}_2\text{O}$  (750  $\mu$ L) dropwise at 0 °C. The solution was stirred for 1 h at 0 °C and for 2.5 h at room temperature.  $\text{NEt}_3$  (110  $\mu$ L, 1.50 mmol, 10.0 eq.) was added. Following, a solution of  $\text{SOCl}_2$  (55  $\mu$ L, 750  $\mu$ mol, 5.00 eq.) in  $\text{Et}_2\text{O}$  (1.5 mL) was added dropwise at room temperature. The solution was stirred for 1 h at room temperature. The reaction was quenched by the addition of sat.  $\text{NaHCO}_3$  and extracted with TBME (3x10 mL). The combined organic phases were washed with sat.  $\text{NaCl}$ , dried over  $\text{MgSO}_4$ , filtered and concentrated. Flash column chromatography on silica gel [petroleum ether to petroleum ether/EtOAc (15:1) to (10:1) to (8:1)] afforded sulfite **19** as an off-white foam (65 mg, 141  $\mu$ mol, 94%).

**TLC** [petroleum ether/EtOAc (4:1)]:  $R_f$  = 0.53 [vanillin: brown].

**$^1\text{H NMR}$**  (400 MHz,  $\text{CDCl}_3$ , major diastereomer):  $\delta$  [ppm] = 7.71 – 7.65 (m, 1 H, 9-*H*), 7.52 – 7.46 (m, 2 H, *o*- $H_{\text{Ts}}$ ), 7.31 – 7.24 (m, 1 H, 10-*H*), 7.22 – 7.07 (m, 4 H, 11-*H*, 12-*H*, *m*- $H_{\text{Ts}}$ ), 5.21 (d,  $J$  = 2.9 Hz, 1 H, 12c-*H*), 4.55 (d,  $J$  = 10.3 Hz, 1 H, 7b-*H*), 3.37 – 3.31 (m, 1 H, 12b-*H*), 2.41

### 3 Experimental procedures and analytical data

(ddd,  $J = 14.0$  Hz, 3.3 Hz, 3.3 Hz, 1 H, 4-*H* (*anti* to 7a-CH<sub>3</sub>)), 2.35 (s, 3 H, *p*-C<sub>Ts</sub>-CH<sub>3</sub>), 1.95 (ddd,  $J = 14.0$  Hz, 14.0 Hz, 4.8 Hz, 1 H, 4-*H* (*syn* to 7a-CH<sub>3</sub>)), 1.87 – 1.67 (m, 2 H, 5-*H*, 7-*H* (*syn* to 7a-CH<sub>3</sub>)), 1.49 (s, 3 H, 4a-CH<sub>3</sub>), 1.43 – 1.27 (m, 2 H, 6-*H*), 1.17 – 0.91 (m, 1 H, 5-*H*), 0.65 – 0.48 (m, 1 H, 7-*H* (*anti* to 7a-CH<sub>3</sub>)).

**<sup>13</sup>C NMR** (101 MHz, CDCl<sub>3</sub>, major diastereomer):  $\delta$  [ppm] = 144.4 (1 C, *p*-C<sub>Ts</sub>), 143.1 (1 C, C-8a), 134.7 (1 C, *ipso*-C<sub>Ts</sub>), 134.2 (1 C, C-12a), 129.8 (2 C, *m*-C<sub>Ts</sub>), 129.2 (1 C, C-10), 127.2 (2 C, *o*-C<sub>Ts</sub>), 125.7 (1 C, C-11), 124.0 (1 C, C-12), 118.0 (1 C, C-9), 103.5 (1 C, C-3a), 91.5 (1 C, C-12c), 74.8 (1 C, C-7b), 52.3 (1 C, C-12b), 49.0 (1 C, C-7a), 32.6 (1 C, C-7), 30.9 (1 C, C-4), 24.8 (1 C, C-5), 21.7 (1 C, *p*-C<sub>Ts</sub>-CH<sub>3</sub>), 20.2 (1 C, C-6), 18.4 (1 C, 7a-CH<sub>3</sub>).

**<sup>1</sup>H NMR** (400 MHz, CDCl<sub>3</sub>, minor diastereomer):  $\delta$  [ppm] = 7.71 – 7.65 (m, 1 H, 9-*H*), 7.52 – 7.46 (m, 2 H, *o*-H<sub>Ts</sub>), 7.31 – 7.24 (m, 1 H, 10-*H*), 7.22 – 7.07 (m, 4 H, 11-*H*, 12-*H*, *m*-H<sub>Ts</sub>), 4.94 (d,  $J = 2.9$  Hz, 1 H, 12c-*H*), 4.89 (d,  $J = 10.1$  Hz, 1 H, 7b-*H*), 3.95 – 3.89 (m, 1 H, 12b-*H*), 2.32 (s, 3 H, *p*-C<sub>Ts</sub>-CH<sub>3</sub>), 1.87 – 1.67 (m, 4 H, 4-*H*, 5-*H*, 7-*H* (*syn* to 7a-CH<sub>3</sub>)), 1.50 (s, 3 H, 4a-CH<sub>3</sub>), 1.43 – 1.27 (m, 2 H, 6-*H*), 1.17 – 0.91 (m, 1 H, 5-*H*), 0.65 – 0.48 (m, 1 H, 7-*H* (*anti* to 7a-CH<sub>3</sub>)).

**<sup>13</sup>C NMR** (101 MHz, CDCl<sub>3</sub>, minor diastereomer):  $\delta$  [ppm] = 144.3 (1 C, *p*-C<sub>Ts</sub>), 143.3 (1 C, C-8a), 135.1 (1 C, C-12a), 134.5 (1 C, *ipso*-C<sub>Ts</sub>), 129.8 (2 C, *m*-C<sub>Ts</sub>), 128.9 (1 C, C-10), 127.3 (2 C, *o*-C<sub>Ts</sub>), 125.7 (1 C, C-11), 123.7 (1 C, C-12), 118.2 (1 C, C-9), 106.3 (1 C, C-3a), 90.1 (1 C, C-12c), 75.1 (1 C, C-7b), 51.7 (1 C, C-12b), 48.0 (1 C, C-7a), 32.5 (1 C, C-7), 29.8 (1 C, C-4), 24.1 (1 C, C-5), 21.7 (1 C, *p*-C<sub>Ts</sub>-CH<sub>3</sub>), 20.3 (1 C, C-6), 18.3 (1 C, 7a-CH<sub>3</sub>).

**IR** (diamond ATR):  $\tilde{\nu}$  [cm<sup>-1</sup>] = 2941 (w), 2870 (w), 1597 (w), 1463 (w), 1353 (m), 1304 (w), 1275 (w), 1216 (m), 1162 (m), 1093 (w), 1036 (w), 987 (m), 919 (w), 855 (w), 811 (m), 764 (m), 704 (m), 658 (m), 620 (w), 573 (m), 544 (w).

**UV/Vis** (THF):  $\lambda_{\max}$  (lg  $\epsilon$ ) = 255 (3.90), 222 (4.21).

**ESI-HRMS**: calculated [C<sub>23</sub>H<sub>25</sub>NO<sub>5</sub>S<sub>2</sub>+Na]<sup>+</sup>: 482.10664  
found: 482.10696 (0.66 ppm).

#### 3.22 *cis*-Hydrindanone **20**

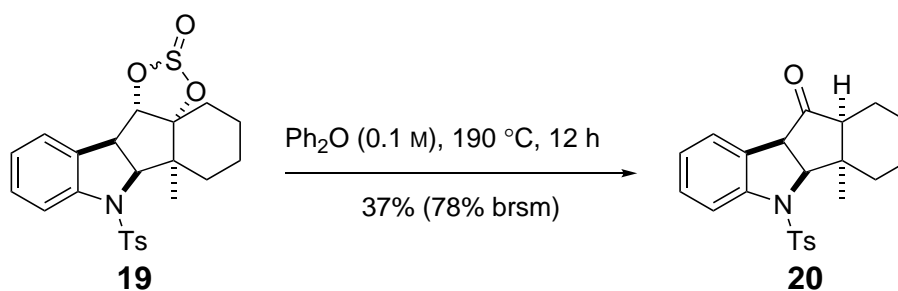

A solution of sulfite **19** (22  $\mu$ g, 48  $\mu$ mol) in Ph<sub>2</sub>O (480  $\mu$ L) was stirred for 12 h at 190 °C. Flash column chromatography on silica gel [petroleum ether to petroleum ether/EtOAc (20:1) to (10:1) to (8:1)] afforded ketone **20** (7 mg, 18  $\mu$ mol, 37%) as a colorless foam and unreacted sulfite **19** (9 mg, 20  $\mu$ mol, 41%) as an off-white foam.

**TLC** [petroleum ether/EtOAc (10:1)]:  $R_f = 0.18$  [vanillin: brown].

**<sup>1</sup>H NMR** (500 MHz, CDCl<sub>3</sub>):  $\delta$  [ppm] = 7.71 – 7.68 (m, 1 H, 6-*H*), 7.51 – 7.48 (m, 2 H, *o*-H<sub>Ts</sub>), 7.42 – 7.39 (m, 1 H, 9-*H*), 7.29 – 7.25 (m, 1 H, 7-*H*), 7.16 – 7.13 (m, 2 H, *m*-H<sub>Ts</sub>), 7.08 (ddd,  $J = 7.6$  Hz, 7.6 Hz, 1.0 Hz, 1 H, 8-*H*), 4.48 (d,  $J = 10.3$  Hz, 1 H, 4b-*H*), 3.53 – 3.49 (m, 1 H, 9b-*H*), 2.34 (s, 3 H, *p*-C<sub>Ts</sub>-CH<sub>3</sub>), 2.18 – 2.13 (m, 1 H, 10a-*H*), 2.07 – 2.00 (m, 1 H, 1-*H* (*anti* to 4a-CH<sub>3</sub>)), 1.66 – 1.60 (m, 1 H, 4-*H* (*syn* to 4a-CH<sub>3</sub>)), 1.53 (s, 3 H, 4a-CH<sub>3</sub>), 1.48 – 1.37 (m, 2 H,

### 3 Experimental procedures and analytical data

1-*H* (*syn* to 4a-CH<sub>3</sub>), 2-*H* (*syn* to 4a-CH<sub>3</sub>)), 1.37 – 1.22 (m, 2 H, 3-*H*), 0.92 – 0.80 (m, 1 H, 2-*H* (*anti* to 4a-CH<sub>3</sub>)), 0.46 (ddd, *J* = 13.3 Hz, 13.3 Hz, 4.3 Hz, 1 H, 4-*H* (*anti* to 4a-CH<sub>3</sub>)).

**<sup>13</sup>C NMR** (126 MHz, CDCl<sub>3</sub>): δ [ppm] = 211.6 (1 C, C-10), 144.2 (1 C, *p*-C<sub>Ts</sub>), 142.6 (1 C, C-5a), 134.7 (1 C, *ipso*-C<sub>Ts</sub>), 130.7 (1 C, C-9a), 129.7 (2 C, *m*-C<sub>Ts</sub>), 128.8 (1 C, C-7), 127.3 (2 C, *o*-C<sub>Ts</sub>), 125.3 (1 C, C-8), 124.6 (1 C, C-9), 117.8 (1 C, C-6), 71.5 (1 C, C-4b), 55.0 (1 C, C-10a), 51.1 (1 C, C-9b), 43.1 (1 C, C-4a), 29.8 (1 C, C-4), 23.6 (1 C, 4a-CH<sub>3</sub>), 22.1 (1 C, C-2), 21.7 (1 C, *p*-C<sub>Ts</sub>-CH<sub>3</sub>), 20.9 (1 C, C-3), 19.6 (1 C, C-1).

**IR** (diamond ATR):  $\tilde{\nu}$  [cm<sup>-1</sup>] = 3035 (w), 2935 (m), 2863 (w), 1741 (m), 1597 (w), 1461 (m), 1346 (s), 1302 (m), 1255 (m), 1199 (w), 1158 (s), 1092 (m), 1034 (m), 965 (m), 873 (w), 807 (m), 755 (s), 709 (m), 660 (s), 609 (m), 569 (s).

**UV/Vis** (THF):  $\lambda_{\max}$  (lg  $\epsilon$ ) = 256 (3.84), 228 (4.05).

**ESI-HRMS**: calculated [C<sub>23</sub>H<sub>25</sub>NO<sub>3</sub>S+Na]<sup>+</sup>: 418.14474  
found: 418.14490 (0.38 ppm).

#### 3.23 *trans*-Hydrindanone 21

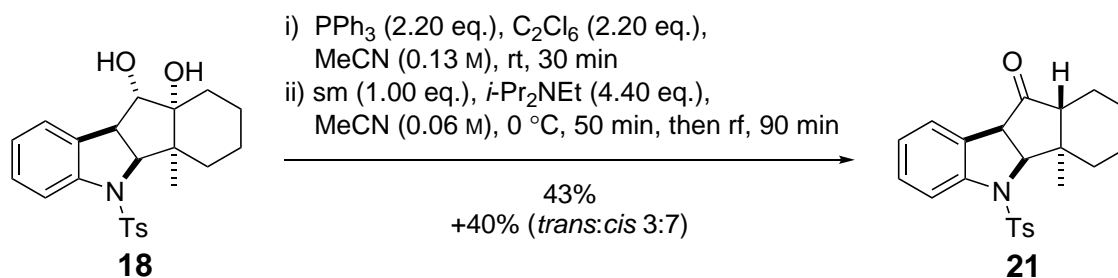

A solution of PPh<sub>3</sub> (354 mg, 1.35 mmol, 2.20 eq.) and C<sub>2</sub>Cl<sub>6</sub> (320 mg, 1.35 mmol, 2.20 eq.) in dry MeCN (4.9 mL) under argon was stirred for 30 min at room temperature. To the solution *i*-Pr<sub>2</sub>NEt (460  $\mu$ L, 2.70 mmol, 4.40 eq.) was added at 0 °C. A solution of diol **18** (254 mg, 614  $\mu$ mol, 1.00 eq.) in dry MeCN (4.9 mL) was added dropwise at 0 °C. The solution was stirred for 50 min at 0 °C and for 90 min under reflux. The reaction was quenched by the addition of H<sub>2</sub>O at 0 °C and extracted with TBME (3x50 mL). The combined organic phases were washed with sat. NaCl, dried over MgSO<sub>4</sub>, filtered and concentrated. Flash column chromatography on silica gel [petroleum ether/EtOAc (11:1) to (8:1), each +1% NEt<sub>3</sub>] afforded *trans*-hydrindanone **21** (104 mg, 263  $\mu$ mol, 43%) as a colorless foam and a mixture of *trans*-hydrindanone **21** and *cis*-hydrindanone **20** (98 mg, 248  $\mu$ mol, 40% **21**:**20** = 3:7) as a colorless foam.

**TLC** [petroleum ether/EtOAc (4:1)]: *R*<sub>f</sub> = 0.57 [vanillin: brown].

**<sup>1</sup>H NMR** (600 MHz, C<sub>6</sub>D<sub>6</sub>): δ [ppm] = 8.00 – 7.98 (m, 1 H, 6-*H*), 7.59 – 7.56 (m, 2 H, *o*-H<sub>Ts</sub>), 7.11 – 7.08 (m, 1 H, 9-*H*), 6.96 – 6.92 (m, 1 H, 7-*H*), 6.66 (ddd, *J* = 7.5 Hz, 7.5 Hz, 1.0 Hz, 1 H, 8-*H*), 6.59 – 6.56 (m, 2 H, *m*-H<sub>Ts</sub>), 4.47 (d, *J* = 8.2 Hz, 1 H, 4b-*H*), 3.35 (d, *J* = 8.5 Hz, 1 H, 9b-*H*), 2.22 – 2.11 (m, 2 H, 4-*H*), 1.97 (dd, *J* = 11.9 Hz, 3.4 Hz, 1 H, 10a-*H*), 1.70 (s, 3 H, *p*-C<sub>Ts</sub>-CH<sub>3</sub>), 1.52 – 1.47 (m, 1 H, 1-*H* (*anti* to 4a-CH<sub>3</sub>)), 1.46 – 1.40 (m, 1 H, 3-*H* (*anti* to 4a-CH<sub>3</sub>)), 1.37 – 1.32 (m, 1 H, 2-*H* (*syn* to 4a-CH<sub>3</sub>)), 1.25 – 1.09 (m, 2 H, 1-*H* (*syn* to 4a-CH<sub>3</sub>), 3-*H* (*syn* to 4a-CH<sub>3</sub>)), 0.72 (s, 3 H, 4a-CH<sub>3</sub>), 0.56 (dddd, *J* = 13.4 Hz, 13.4 Hz, 13.4 Hz, 4.5 Hz, 4.5 Hz, 1 H, 2-*H* (*anti* to 4a-CH<sub>3</sub>)).

**<sup>13</sup>C NMR** (151 MHz, C<sub>6</sub>D<sub>6</sub>): δ [ppm] = 209.6 (1 C, C-10), 144.3 (1 C, C-5a), 144.0 (1 C, *p*-C<sub>Ts</sub>), 134.7 (1 C, *ipso*-C<sub>Ts</sub>), 129.6 (1 C, C-9a), 129.6 (2 C, *m*-C<sub>Ts</sub>), 128.9 (1 C, C-7), 128.1 (2 C, *o*-C<sub>Ts</sub>), 125.1 (1 C, C-8), 125.1 (1 C, C-9), 117.3 (1 C, C-6), 73.2 (1 C, C-4b), 53.5 (1 C, C-9b),

### 3 Experimental procedures and analytical data

50.5 (1 C, C-10a), 43.7 (1 C, C-4a), 34.4 (1 C, C-4), 24.7 (1 C, C-2), 21.5 (1 C, C-3), 21.0 (1 C, *p*-C<sub>Ts</sub>-CH<sub>3</sub>), 19.7 (1 C, C-1), 19.6 (1 C, 4a-CH<sub>3</sub>).

**IR** (diamond ATR):  $\tilde{\nu}$  [cm<sup>-1</sup>] = 2932 (m), 2860 (w), 1744 (m), 1594 (w), 1463 (m), 1352 (m), 1352 (m), 1301 (w), 1242 (w), 1161 (s), 1094 (m), 1034 (m), 973 (m), 939 (m), 858 (w), 811 (m), 752 (m), 710 (m), 667 (s), 620 (m), 572 (s).

**UV/Vis** (THF):  $\lambda_{\max}$  (lg  $\epsilon$ ) = 290 (3.46), 257 (3.85), 221 (4.34).

**ESI-HRMS**: calculated [C<sub>23</sub>H<sub>25</sub>NO<sub>3</sub>S+K]<sup>+</sup>: 434.11867

found: 434.11891 (0.55 ppm).

#### 3.24 Alcohol S11

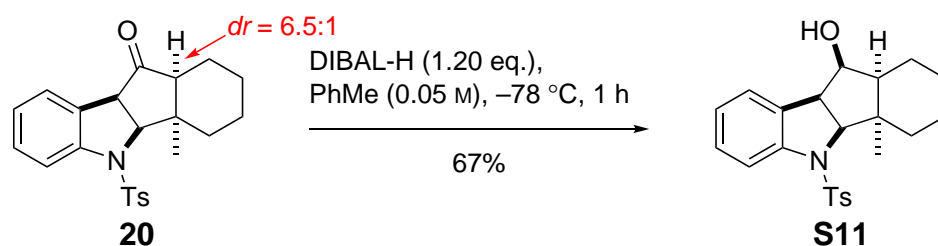

To a solution of ketone **20** and **21** (102 mg, 258  $\mu$ mol, 1.00 eq., **20:21** = 6.5:1) in dry PhMe (5.2 mL) under argon was added DIBAL-H (1.2 M in PhMe, 260  $\mu$ L, 309  $\mu$ mol, 1.20 eq.) dropwise at  $-78$  °C. The solution was stirred at  $-78$  °C for 1 h. The reaction was quenched by the addition of MeOH at  $-78$  °C. Sat. sodium potassium tartrate was added and the mixture stirred vigorously for 30 min at room temperature. The mixture was extracted with TBME (3x20 mL). The combined organic phases were washed with sat. NaCl, dried over MgSO<sub>4</sub>, filtered and concentrated. Flash column chromatography on silica gel [petroleum ether/EtOAc (4:1)] afforded a alcohol **S11** as a colorless foam (69 mg, 174  $\mu$ mol, 67%).

**TLC** [petroleum ether/EtOAc (4:1)]:  $R_f$  = 0.30 [vanillin: brown].

**<sup>1</sup>H NMR** (500 MHz, CDCl<sub>3</sub>):  $\delta$  [ppm] = 7.76 – 7.73 (m, 1 H, 6-*H*), 7.50 – 7.47 (m, 2 H, *o*-H<sub>Ts</sub>), 7.28 – 7.23 (m, 1 H, 7-*H*), 7.15 – 7.08 (m, 3 H, *m*-H<sub>Ts</sub>, 9-*H*), 7.04 (ddd,  $J$  = 7.4 Hz, 7.4 Hz, 1.0 Hz, 1 H, 8-*H*), 4.49 (dd,  $J$  = 6.7 Hz, 6.7 Hz, 1 H, 10-*H*), 4.16 (d,  $J$  = 10.2 Hz, 1 H, 4b-*H*), 3.67 (dd,  $J$  = 10.2 Hz, 7.8 Hz, 1 H, 9b-*H*), 2.33 (s, 3 H, *p*-C<sub>Ts</sub>-CH<sub>3</sub>), 1.94 – 1.84 (m, 1 H, 4-*H*), 1.63 (ddd,  $J$  = 6.0 Hz, 6.0 Hz, 6.0 Hz, 1 H, 10a-*H*), 1.60 – 1.45 (m, 5 H, 1-*H*, 2-*H*, 3-*H*, 4-*H*), 1.30 – 1.17 (m, 5 H, 2-*H*, 4a-CH<sub>3</sub>, 10-OH), 1.12 – 1.02 (m, 1 H, 1-*H*).

**<sup>13</sup>C NMR** (126 MHz, CDCl<sub>3</sub>):  $\delta$  [ppm] = 144.0 (1 C, C-5a), 143.9 (1 C, *p*-C<sub>Ts</sub>), 134.3 (1 C, *ipso*-C<sub>Ts</sub>), 132.1 (1 C, C-9a), 129.5 (2 C, *m*-C<sub>Ts</sub>), 128.6 (1 C, C-7), 127.6 (2 C, *o*-C<sub>Ts</sub>), 125.7 (1 C, C-9), 124.5 (1 C, C-8), 117.6 (1 C, C-6), 76.6 (1 C, C-10), 76.4 (1 C, C-4b), 50.2 (1 C, C-9b), 48.8 (1 C, C-10a), 43.8 (1 C, C-4a), 31.8 (1 C, C-4), 28.6 (1 C, 4a-CH<sub>3</sub>), 23.4 (1 C, C-2), 22.5 (1 C, C-1), 21.8 (1 C, C-3), 21.6 (1 C, *p*-C<sub>Ts</sub>-CH<sub>3</sub>).

**IR** (diamond ATR):  $\tilde{\nu}$  [cm<sup>-1</sup>] = 3553 (br. s), 2925 (m), 2862 (w), 1597 (w), 1465 (m), 1400 (w), 1345 (s), 1293 (w), 1241 (w), 1161 (s), 1089 (m), 1034 (m), 974 (m), 951 (m), 908 (m), 811 (m), 723 (s), 664 (s), 573 (s).

**UV/Vis** (THF):  $\lambda_{\max}$  (lg  $\epsilon$ ) = 258 (3.78), 223 (4.14).

**ESI-HRMS**: calculated [C<sub>23</sub>H<sub>27</sub>NO<sub>3</sub>S+Na]<sup>+</sup>: 420.16039

found: 420.16061 (0.52 ppm).

3.25 Silyl ether **S13** and xanthate **S12**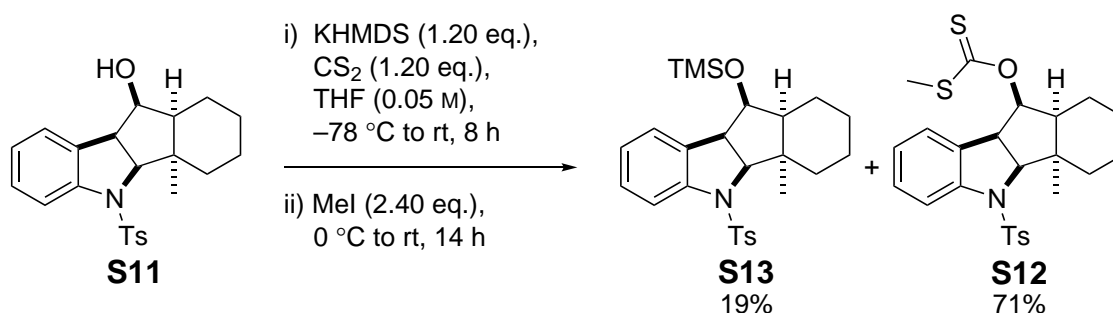

To a solution of alcohol **S11** (62 mg, 156 μmol, 1.00 eq.) and CS<sub>2</sub> (10 μL, 187 μmol, 1.20 eq.) in dry THF (3.1 mL) under argon was added KHMDS (0.5 M in PhMe, 370 μL, 187 μmol, 1.20 eq.) dropwise at -78 °C. The solution was stirred for 10 min at -78 °C and for 8 h at room temperature. Mel (20 μL, 374 μmol, 2.40 eq.) was added at 0 °C. The solution was stirred for 14 h at room temperature. The reaction was quenched by the addition of sat. NH<sub>4</sub>Cl and extracted with TBME (3x10 mL). The combined organic phases were washed with sat. NaCl, dried over MgSO<sub>4</sub>, filtered and concentrated. Flash column chromatography on silica gel [petroleum ether/EtOAc (30:1) to (20:1) to (15:1)] afforded silyl ether **S13** (14 mg, 30 μmol, 19%) as a colorless solid and xanthate **S12** (54 mg, 111 μmol, 71%) as a yellow oil.

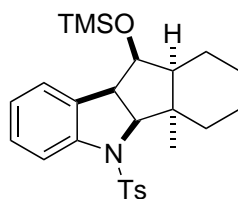

**TLC** [petroleum ether/EtOAc (4:1)]:  $R_f = 0.69$  [vanillin: brown].

**<sup>1</sup>H NMR** (400 MHz, CDCl<sub>3</sub>):  $\delta$  [ppm] = 7.68 – 7.64 (m, 1 H, 6-*H*), 7.48 – 7.43 (m, 2 H, *o*-*H*<sub>Ts</sub>), 7.22 – 7.17 (m, 1 H, 7-*H*), 7.16 – 7.12 (m, 1 H, 9-*H*), 7.12 – 7.08 (m, 2 H, *m*-*H*<sub>Ts</sub>), 6.97 (ddd,  $J = 7.4$  Hz, 7.4 Hz, 1.1 Hz, 1 H, 8-*H*), 4.59 (dd,  $J = 8.3$  Hz, 6.5 Hz, 1 H, 10-*H*), 4.10 (d,  $J = 9.3$  Hz, 1 H, 4b-*H*), 3.47 (dd,  $J = 8.8$  Hz, 8.8 Hz, 1 H, 9b-*H*), 2.39 – 2.30 (m, 4 H, 4-*H*, *p*-*C*<sub>Ts</sub>-CH<sub>3</sub>), 1.55 – 1.23 (m, 6 H, 1-*H*, 2-*H*, 3-*H*, 4-*H*, 10a-*H*), 1.16 (s, 3 H, 4a-CH<sub>3</sub>), 1.00 – 0.80 (m, 1 H, 3-*H*), 0.45 – 0.29 (m, 1 H, 1-*H*), 0.09 (s, 9 H, 10-O-Si(CH<sub>3</sub>)<sub>3</sub>).

**<sup>13</sup>C NMR** (101 MHz, CDCl<sub>3</sub>):  $\delta$  [ppm] = 143.7 (1 C, *p*-*C*<sub>Ts</sub>), 142.9 (1 C, C-5a), 134.6 (1 C, *ipso*-*C*<sub>Ts</sub>), 134.4 (1 C, C-9a), 129.4 (2 C, *m*-*C*<sub>Ts</sub>), 127.7 (1 C, C-7), 127.5 (2 C, *o*-*C*<sub>Ts</sub>), 127.1 (1 C, C-9), 124.0 (1 C, C-8), 117.1 (1 C, C-6), 75.7 (1 C, C-10), 74.6 (1 C, C-4b), 49.5 (1 C, C-10a), 49.4 (1 C, C-9b), 43.2 (1 C, C-4a), 33.3 (1 C, C-4), 31.7 (1 C, 4a-CH<sub>3</sub>), 23.8 (1 C, C-3), 23.4 (1 C, C-1), 23.0 (1 C, C-2), 21.6 (1 C, *p*-*C*<sub>Ts</sub>-CH<sub>3</sub>), 0.1 (3 C, 10-O-Si(CH<sub>3</sub>)<sub>3</sub>).

**IR** (diamond ATR):  $\tilde{\nu}$  [cm<sup>-1</sup>] = 2929 (m), 2860 (w), 1596 (w), 1463 (m), 1394 (w), 1347 (m), 1298 (w), 1249 (m), 1159 (s), 1101 (s), 1052 (m), 961 (m), 893 (m), 835 (s), 739 (s), 665 (s), 638 (m), 569 (s), 541 (w).

**UV/Vis** (THF):  $\lambda_{\max}$  (lg  $\epsilon$ ) = 259 (3.82), 222 (4.25).

**ESI-HRMS**: calculated [C<sub>26</sub>H<sub>35</sub>NO<sub>3</sub>SSi+Na]<sup>+</sup>: 492.19991  
found: 492.19972 (0.39 ppm).



### 3 Experimental procedures and analytical data

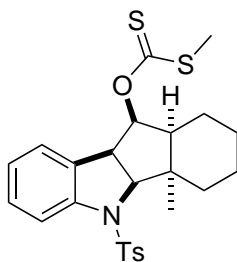

**TLC** [petroleum ether/EtOAc (4:1)]:  $R_f = 0.54$  [vanillin: brown].

**$^1\text{H NMR}$**  (500 MHz,  $\text{CDCl}_3$ ):  $\delta$  [ppm] = 7.73 (d,  $J = 8.2$  Hz, 1 H, 6-*H*), 7.49 – 7.46 (m, 2 H, *o*- $H_{\text{Ts}}$ ), 7.25 – 7.21 (m, 1 H, 7-*H*), 7.15 – 7.11 (m, 2 H, *m*- $H_{\text{Ts}}$ ), 6.99 (ddd,  $J = 7.5$  Hz, 7.5 Hz, 1.1 Hz, 1 H, 8-*H*), 6.93 – 6.90 (m, 1 H, 9-*H*), 6.54 (dd,  $J = 7.8$  Hz, 5.9 Hz, 1 H, 10-*H*), 4.22 (d,  $J = 10.4$  Hz, 1 H, 4b-*H*), 3.92 (dd,  $J = 10.1$  Hz, 7.9 Hz, 1 H, 9b-*H*), 2.33 (s, 3 H, *p*- $\text{C}_{\text{Ts}}\text{-CH}_3$ ), 2.16 (s, 3 H, 10-O-C(=S)-S $\text{CH}_3$ ), 1.95 (ddd,  $J = 5.9$  Hz, 5.9 Hz, 5.9 Hz, 1 H, 10a-*H*), 1.76 (ddd,  $J = 13.8$  Hz, 10.0 Hz, 3.7 Hz, 1 H, 4-*H* (*anti* to 4a- $\text{CH}_3$ )), 1.66 – 1.46 (m, 5 H, 1-*H*, 2-*H*, 3-*H*, 4-*H* (*syn* to  $\text{CH}_3$ )), 1.38 – 1.20 (m, 5 H, 4a- $\text{CH}_3$ , 1-*H*, 3-*H*).

**$^{13}\text{C NMR}$**  (126 MHz,  $\text{CDCl}_3$ ):  $\delta$  [ppm] = 215.3 (1 C, 10-O-C(=S)-S $\text{CH}_3$ ), 144.1 (1 C, *p*- $\text{C}_{\text{Ts}}$ ), 143.4 (1 C, C-5a), 134.2 (1 C, *ipso*- $\text{C}_{\text{Ts}}$ ), 131.7 (1 C, C-9a), 129.6 (2 C, *m*- $\text{C}_{\text{Ts}}$ ), 128.4 (1 C, C-7), 127.5 (2 C, *o*- $\text{C}_{\text{Ts}}$ ), 126.0 (1 C, C-9), 124.6 (1 C, C-8), 117.2 (1 C, C-6), 86.4 (1 C, C-10), 76.3 (1 C, C-4b), 48.8 (1 C, C-9b), 48.1 (1 C, C-10a), 44.0 (1 C, C-4a), 30.3 (1 C, C-4), 27.3 (1 C, 4a- $\text{CH}_3$ ), 22.6 (1 C, C-3), 22.3 (1 C, C-1), 21.7 (1 C, *p*- $\text{C}_{\text{Ts}}\text{-CH}_3$ ), 21.3 (1 C, C-2), 18.4 (1 C, 10-O-C(=S)-S $\text{CH}_3$ ).

**IR** (diamond ATR):  $\tilde{\nu}$  [ $\text{cm}^{-1}$ ] = 2919 (m), 2860 (m), 1596 (w), 1467 (m), 1348 (m), 1254 (w), 1216 (s), 1159 (s), 1093 (m), 1040 (s), 955 (s), 903 (m), 809 (m), 761 (m), 732 (m), 667 (s), 576 (s).

**UV/Vis** (THF):  $\lambda_{\text{max}}$  ( $\lg \epsilon$ ) = 280 (4.12), 223 (4.31).

**ESI-HRMS**: calculated [ $\text{C}_{25}\text{H}_{29}\text{NO}_3\text{S}_3+\text{Na}$ ] $^+$ : 510.12018

found: 510.12015 (0.06 ppm).

#### 3.26 *cis*-Hydrindane S14

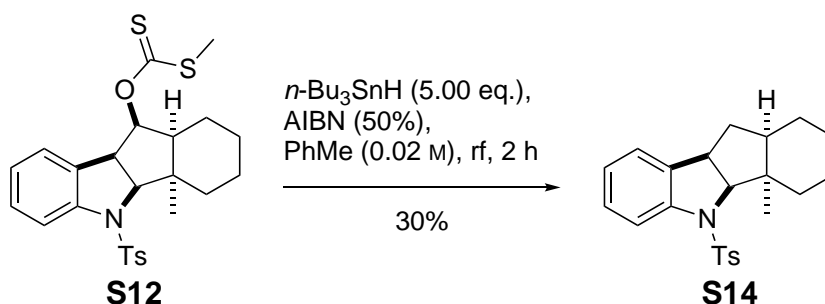

A solution of xanthate **S12** (42 mg, 86  $\mu\text{mol}$ , 1.00 eq.),  $n\text{-Bu}_3\text{SnH}$  (120  $\mu\text{L}$ , 431  $\mu\text{mol}$ , 5.00 eq.) and AIBN (7 mg, 43  $\mu\text{mol}$ , 0.50 eq.) in dry PhMe (4.3 mL) was degassed (three freeze-pump-thaw cycles) and back filled with Ar. The solution was stirred under reflux for 2 h and concentrated. Flash column chromatography on silica gel [petroleum ether/EtOAc (100:1) to (60:1) to (30:1) to (20:1)] afforded *cis*-hydrindane **S14** as a colorless solid (10 mg, 26  $\mu\text{mol}$ , 30%).

**TLC** [petroleum ether/EtOAc (10:1)]:  $R_f = 0.50$  [vanillin: brown].

**$^1\text{H NMR}$**  (500 MHz,  $\text{CDCl}_3$ ):  $\delta$  [ppm] = 7.68 – 7.65 (m, 1 H, 6-*H*), 7.50 – 7.47 (m, 2 H, *o*- $H_{\text{Ts}}$ ), 7.21 – 7.16 (m, 1 H, 7-*H*), 7.14 – 7.10 (m, 2 H, *m*- $H_{\text{Ts}}$ ), 7.03 (ddd,  $J = 7.4$  Hz, 7.4 Hz, 1.0 Hz, 1 H,

### 3 Experimental procedures and analytical data

8-*H*), 7.00 – 6.97 (m, 1 H, 9-*H*), 4.11 (d,  $J = 10.6$  Hz, 1 H, 4b-*H*), 3.32 (ddd,  $J = 10.1$  Hz, 10.1 Hz, 6.6 Hz, 1 H, 9b-*H*), 2.33 (s, 3 H, *p*-C<sub>Ts</sub>-CH<sub>3</sub>), 2.06 – 1.96 (m, 1 H, 10-*H* (*syn* to 4a-CH<sub>3</sub>)), 1.78 – 1.68 (m, 2 H, 10-*H* (*anti* to 4a-CH<sub>3</sub>), 10a-*H*), 1.59 (dddd,  $J = 13.6$  Hz, 13.6 Hz, 4.0 Hz, 4.0 Hz, 1 H, 1-*H*), 1.48 – 1.11 (m, 9 H, 1-*H*, 2-*H*, 3-*H*, 4-*H*, 4a-CH<sub>3</sub>), 0.90 – 0.82 (m, 1 H, 4-*H*).  
**<sup>13</sup>C NMR** (126 MHz, CDCl<sub>3</sub>):  $\delta$  [ppm] = 143.6 (1 C, *p*-C<sub>Ts</sub>), 142.9 (1 C, C-5a), 139.4 (1 C, C-9a), 135.1 (1 C, *ipso*-C<sub>Ts</sub>), 129.5 (2 C, *m*-C<sub>Ts</sub>), 127.6 (1 C, C-7), 127.3 (2 C, *o*-C<sub>Ts</sub>), 125.0 (1 C, C-8), 124.0 (1 C, C-9), 117.3 (1 C, C-6), 78.3 (1 C, C-4b), 44.1 (1 C, C-10a), 44.0 (1 C, C-4a), 42.9 (1 C, C-9b), 34.1 (1 C, C-10), 27.5 (1 C, C-4), 23.8 (1 C, C-1), 23.5 (1 C, 4a-CH<sub>3</sub>), 21.8 (1 C, C-3), 21.6 (1 C, *p*-C<sub>Ts</sub>-CH<sub>3</sub>), 20.5 (1 C, C-2).

**IR** (diamond ATR):  $\tilde{\nu}$  [cm<sup>-1</sup>] = 2926 (m), 2863 (w), 1597 (w), 1461 (m), 1344 (m), 1258 (w), 1227 (w), 1158 (s), 1092 (m), 1023 (m), 955 (m), 894 (w), 805 (m), 755 (m), 714 (w), 665 (m), 622 (w), 570 (m).

**UV/Vis** (THF):  $\lambda_{\max}$  (lg  $\epsilon$ ) = 258 (3.81).

**ESI-HRMS**: calculated [C<sub>23</sub>H<sub>27</sub>NO<sub>2</sub>S+Na]<sup>+</sup>: 404.16547  
found: 404.16558 (0.27 ppm).

#### 3.27 Alcohols **S15** and **S22**

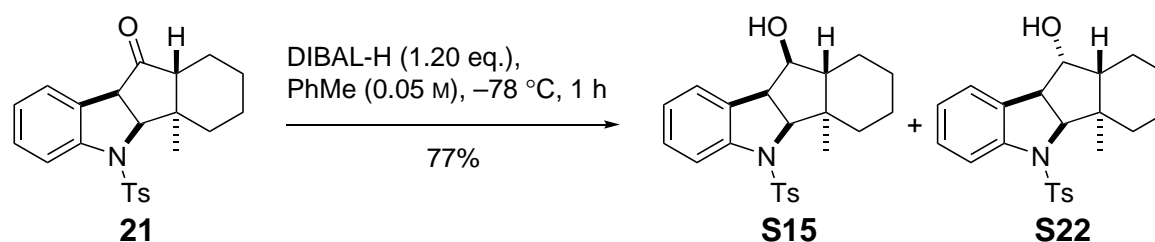

To a solution of ketone **21** (40 mg, 101  $\mu$ mol, 1.00 eq.) in dry PhMe (2.0 mL) under argon was added DIBAL-H (1.2 M in PhMe, 100  $\mu$ L, 120  $\mu$ mol, 1.20 eq.) dropwise at  $-78$   $^\circ$ C. The solution was stirred at  $-78$   $^\circ$ C for 1 h. The reaction was quenched by the addition of MeOH at  $-78$   $^\circ$ C. Sat. sodium potassium tartrate was added and the mixture stirred vigorously for 30 min at room temperature. The mixture was extracted with TBME (3x10 mL). The combined organic phases were washed with sat. NaCl, dried over MgSO<sub>4</sub>, filtered and concentrated. Flash column chromatography on silica gel [petroleum ether/EtOAc (4:1)] afforded a inseparable mixture of alcohols **S15** and **S22** as a colorless foam (31 mg, 78  $\mu$ mol, 77%, **S15**:**S22** = 5:2).

**TLC** [petroleum ether/EtOAc (4:1)]:  $R_f = 0.23$  [vanillin: brown].

**<sup>1</sup>H NMR** (600 MHz, C<sub>6</sub>D<sub>6</sub>, major diastereomer):  $\delta$  [ppm] = 8.05 – 8.02 (m, 1 H, 6-*H*), 7.60 – 7.57 (m, 2 H, *o*-H<sub>Ts</sub>), 7.08 – 7.05 (m, 1 H, 9-*H*), 7.03 – 7.00 (m, 1 H, 7-*H*), 6.79 – 6.74 (m, 1 H, 8-*H*), 6.59 – 6.54 (m, 2 H, *m*-H<sub>Ts</sub>), 4.28 (d,  $J = 8.5$  Hz, 1 H, 4b-*H*), 3.68 (ddd,  $J = 9.8$  Hz, 9.8 Hz, 9.8 Hz, 1 H, 10-*H*), 3.35 (dd,  $J = 8.3$  Hz, 8.3 Hz, 1 H, 9b-*H*), 2.24 (ddd,  $J = 13.3$  Hz, 3.2 Hz, 3.2 Hz, 1 H, 4-*H* (*syn* to 4a-CH<sub>3</sub>)), 2.01 (ddd,  $J = 13.4$  Hz, 13.4 Hz, 4.2 Hz, 1 H, 4-*H* (*anti* to 4a-CH<sub>3</sub>)), 1.69 (s, 3 H, *p*-C<sub>Ts</sub>-CH<sub>3</sub>), 1.59 – 1.30 (m, 4 H, 1-*H*, 2-*H* (*anti* to 4a-CH<sub>3</sub>), 3-*H*), 1.05 (dddd,  $J = 12.7$  Hz, 12.7 Hz, 12.7 Hz, 3.8 Hz, 1 H, 2-*H* (*syn* to 4a-CH<sub>3</sub>)), 0.92 – 0.76 (m, 5 H, 1-*H*, 4a-CH<sub>3</sub>, 10a-*H*), 0.42 (d,  $J = 10.3$  Hz, 1 H, 10-OH).

**<sup>13</sup>C NMR** (151 MHz, C<sub>6</sub>D<sub>6</sub>, major diastereomer):  $\delta$  [ppm] = 145.3 (1 C, C-5a), 143.6 (1 C, *p*-C<sub>Ts</sub>), 135.2 (1 C, *ipso*-C<sub>Ts</sub>), 130.7 (1 C, C-9a), 129.5 (2 C, *m*-C<sub>Ts</sub>), 128.3 (1 C, C-7), 128.0 (2 C, *o*-C<sub>Ts</sub>), 127.8 (1 C, C-9), 123.9 (1 C, C-8), 116.6 (1 C, C-6), 75.9 (1 C, C-10), 75.1 (1 C, C-4b),

### 3 Experimental procedures and analytical data

49.5 (1 C, C-10a), 47.4 (1 C, C-9b), 43.2 (1 C, C-4a), 35.7 (1 C, C-4), 25.7 (1 C, C-1), 23.2 (1 C, C-2), 21.8 (1 C, C-3), 21.0 (1 C, *p*-C<sub>Ts</sub>-CH<sub>3</sub>), 19.5 (1 C, 4a-CH<sub>3</sub>).

**<sup>1</sup>H NMR** (600 MHz, C<sub>6</sub>D<sub>6</sub>, minor diastereomer): δ [ppm] = 8.02 – 8.00 (m, 1 H, 6-*H*), 7.64 – 7.61 (m, 2 H, *o*-H<sub>Ts</sub>), 6.99 – 6.96 (m, 1 H, 7-*H*), 6.79 – 6.74 (m, 2 H, 8-*H*, 9-*H*), 6.59 – 6.54 (m, 2 H, *m*-H<sub>Ts</sub>), 4.60 (d, *J* = 8.7 Hz, 1 H, 4b-*H*), 3.60 (d, *J* = 4.0 Hz, 1 H, 10-*H*), 3.49 (d, *J* = 8.6 Hz, 1 H, 9b-*H*), 2.37 (ddd, *J* = 13.2 Hz, 3.1 Hz, 3.1 Hz, 1 H, 4-*H* (*syn* to 4a-CH<sub>3</sub>)), 2.01 (ddd, *J* = 13.4 Hz, 13.4 Hz, 4.2 Hz, 1 H, 4-*H* (*anti* to 4a-CH<sub>3</sub>)), 1.67 (s, 3 H, *p*-C<sub>Ts</sub>-CH<sub>3</sub>), 1.59 – 1.30 (m, 7 H, 1-*H*, 2-*H*, 3-*H*, 4a-CH<sub>3</sub>), 1.18 – 1.12 (m, 2 H, 2-*H*, 10a-*H*), 0.92 – 0.76 (m, 2 H, 1-*H*, 10-*OH*).

**<sup>13</sup>C NMR** (151 MHz, C<sub>6</sub>D<sub>6</sub>, minor diastereomer): δ [ppm] = 144.1 (1 C, C-5a), 143.5 (1 C, *p*-C<sub>Ts</sub>), 135.3 (1 C, *ipso*-C<sub>Ts</sub>), 134.5 (1 C, C-9a), 129.5 (2 C, *m*-C<sub>Ts</sub>), 128.2 (1 C, C-7 (HSQC)), 128.0 (2 C, *o*-C<sub>Ts</sub>), 125.3 (1 C, C-9), 124.5 (1 C, C-8), 117.0 (1 C, C-6), 83.0 (1 C, C-10), 76.8 (1 C, C-4b), 55.4 (1 C, C-9b), 48.5 (1 C, C-10), 46.3 (1 C, C-4a), 37.0 (1 C, C-4), 26.1 (1 C, C-1), 22.0 (1 C, 4a-CH<sub>3</sub>), 21.7 (1 C, C-3), 21.6 (1 C, C-2), 21.0 (1 C, *p*-C<sub>Ts</sub>-CH<sub>3</sub>).

**IR** (diamond ATR):  $\tilde{\nu}$  [cm<sup>-1</sup>] = 3528 (w), 3454 (w), 2927 (m), 2861 (w), 1596 (w), 1467 (m), 1346 (m), 1238 (w), 1159 (s), 1090 (m), 1032 (m), 978 (w), 935 (m), 807 (m), 755 (m), 675 (m), 616 (w), 568 (s), 543 (w).

**UV/Vis** (THF):  $\lambda_{\max}$  (lg  $\epsilon$ ) = 262 (3.77), 222 (4.21).

**ESI-HRMS**: calculated [C<sub>23</sub>H<sub>27</sub>NO<sub>3</sub>S+Na]<sup>+</sup>: 420.16039  
found: 420.16059 (0.48 ppm).

#### 3.28 Xanthates S16 and S23 and silyl ether S17

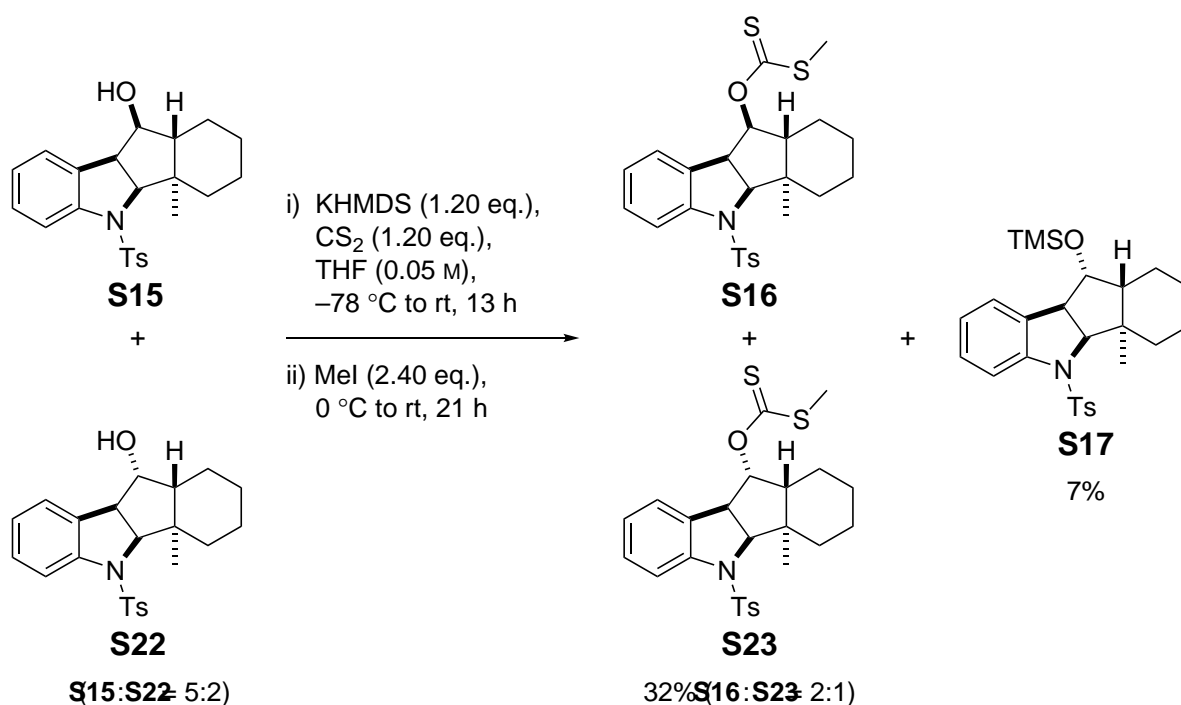

To a solution of alcohols **S15** and **S22** (72 mg, 181  $\mu$ mol, 1.00 eq., **S15**:**S22** = 5:2) and CS<sub>2</sub> (13  $\mu$ L, 217  $\mu$ mol, 1.20 eq.) in dry THF (3.6 mL) under argon was added KHMDS (0.5 M in PhMe, 430  $\mu$ L, 217  $\mu$ mol, 1.20 eq.) dropwise at -78 °C. The solution was stirred for 10 min at -78 °C and for 13 h at room temperature. MeI (27  $\mu$ L, 435  $\mu$ mol, 2.40 eq.) was added at 0 °C. The solution was stirred for 21 h at room temperature. The reaction was quenched by the addition of sat. NH<sub>4</sub>Cl and extracted with TBME (3x10 mL). The combined organic phases were washed

### 3 Experimental procedures and analytical data

with sat. NaCl, dried over MgSO<sub>4</sub>, filtered and concentrated. Flash column chromatography on silica gel [petroleum ether/EtOAc (30:1) to (20:1) to (15:1)] afforded silyl ether **S17** (6 mg, 13 μmol, 7%) as a colorless solid and xanthates **S16** and **S23** (28 mg, 57 μmol, 32%, **S16**:**S23** = 2:1) as a yellow oil.

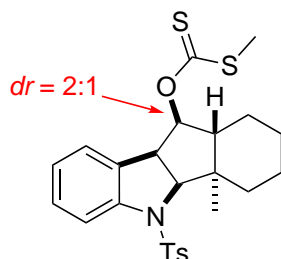

**TLC** [petroleum ether/EtOAc (20:1)]:  $R_f$  = 0.31 [vanillin: brown].

**<sup>1</sup>H NMR** (600 MHz, C<sub>6</sub>D<sub>6</sub>, major diastereomer):  $\delta$  [ppm] = 8.05 – 8.02 (m, 1 H, 6-*H*), 7.58 – 7.55 (m, 2 H, *o*-*H*<sub>Ts</sub>), 7.09 – 7.06 (m, 1 H, 9-*H*), 7.02 – 6.97 (m, 1 H, 7-*H*), 6.83 – 6.77 (m, 1 H, 8-*H*), 6.58 – 6.55 (m, 2 H, *m*-*H*<sub>Ts</sub>), 5.72 (dd,  $J$  = 11.9 Hz, 7.9 Hz, 1 H, 10-*H*), 4.36 (d,  $J$  = 8.5 Hz, 1 H, 4b-*H*), 4.16 (dd,  $J$  = 8.2 Hz, 8.2 Hz, 1 H, 9b-*H*), 2.26 – 2.20 (m, 1 H, 4-*H* (*syn* to 4a-CH<sub>3</sub>)), 2.08 – 1.98 (m, 4 H, 4-*H* (*anti* to 4a-CH<sub>3</sub>), 10-O-C(=S)-SCH<sub>3</sub>), 1.71 – 1.64 (m, 4 H, 10a-*H*, *p*-C<sub>Ts</sub>-CH<sub>3</sub>), 1.53 – 1.22 (m, 4 H, 1-*H*, 2-*H*, 3-*H*), 1.04 (dddd,  $J$  = 12.8 Hz, 12.8 Hz, 12.8 Hz, 3.9 Hz, 1 H, 1-*H*), 0.81 (s, 3 H, 4a-CH<sub>3</sub>), 0.79 – 0.66 (m, 1 H, 2-*H*).

**<sup>13</sup>C NMR** (151 MHz, C<sub>6</sub>D<sub>6</sub>, major diastereomer):  $\delta$  [ppm] = 216.8 (1 C, 10-O-C(=S)-SCH<sub>3</sub>), 145.1 (1 C, C-5a), 143.8 (1 C, *p*-C<sub>Ts</sub>), 135.0 (1 C, *ipso*-C<sub>Ts</sub>), 130.1 (1 C, C-9a), 129.5 (2 C, *m*-C<sub>Ts</sub>), 128.6 (1 C, C-7), 128.0 (2 C, *o*-C<sub>Ts</sub> (HSQC)), 127.4 (1 C, C-9), 124.2 (1 C, C-8), 116.7 (1 C, C-6), 87.2 (1 C, C-10), 75.2 (1 C, C-4b), 46.0 (1 C, C-10a), 45.3 (1 C, C-9b), 42.6 (1 C, C-4a), 35.5 (1 C, C-4), 25.2 (1 C, C-2), 23.1 (1 C, C-1), 21.6 (1 C, C-3), 21.0 (1 C, *p*-C<sub>Ts</sub>-CH<sub>3</sub>), 19.4 (1 C, 4a-CH<sub>3</sub>), 18.6 (1 C, 10-O-C(=S)-SCH<sub>3</sub>).

**<sup>1</sup>H NMR** (600 MHz, C<sub>6</sub>D<sub>6</sub>, minor diastereomer):  $\delta$  [ppm] = 8.02 – 7.99 (m, 1 H, 6-*H*), 7.68 – 7.66 (m, 1 H, 9-*H*), 7.61 – 7.58 (m, 2 H, *o*-*H*<sub>Ts</sub>), 7.02 – 6.97 (m, 1 H, 7-*H*), 6.83 – 6.77 (m, 1 H, 8-*H*), 6.58 – 6.55 (m, 2 H, *m*-*H*<sub>Ts</sub>), 5.59 (d,  $J$  = 4.0 Hz, 1 H, 10-*H*), 4.46 (d,  $J$  = 8.6 Hz, 1 H, 4b-*H*), 3.85 (d,  $J$  = 8.7 Hz, 1 H, 9b-*H*), 2.40 – 2.35 (m, 1 H, 4-*H* (*syn* to 4a-CH<sub>3</sub>)), 2.08 – 1.98 (m, 4 H, 4-*H* (*anti* to 4a-CH<sub>3</sub>), 10-O-C(=S)-SCH<sub>3</sub>), 1.71 – 1.64 (m, 3 H, *p*-C<sub>Ts</sub>-CH<sub>3</sub>), 1.53 – 1.22 (m, 5 H, 1-*H*, 2-*H*, 3-*H*, 10a-*H*), 1.20 (s, 3 H, 4a-CH<sub>3</sub>), 1.14 – 1.09 (m, 1 H, 1-*H*), 0.79 – 0.66 (m, 1 H, 2-*H*).

**<sup>13</sup>C NMR** (151 MHz, C<sub>6</sub>D<sub>6</sub>, minor diastereomer):  $\delta$  [ppm] = 215.6 (1 C, 10-O-C(=S)-SCH<sub>3</sub>), 144.1 (1 C, C-5a), 143.7 (1 C, *p*-C<sub>Ts</sub>), 135.1 (1 C, *ipso*-C<sub>Ts</sub>), 132.9 (1 C, C-9a), 129.5 (2 C, *m*-C<sub>Ts</sub>), 128.9 (1 C, C-7), 128.0 (2 C, *o*-C<sub>Ts</sub> (HSQC)), 126.3 (1 C, C-9), 125.0 (1 C, C-8), 116.8 (1 C, C-6), 93.2 (1 C, C-10), 76.1 (1 C, C-4b), 52.6 (1 C, C-9b), 47.4 (1 C, C-10a), 46.9 (1 C, C-4a), 36.9 (1 C, C-4), 25.9 (1 C, C-2), 21.7 (1 C, C-1), 21.5 (1 C, C-3), 21.4 (1 C, 4a-CH<sub>3</sub>), 21.0 (1 C, *p*-C<sub>Ts</sub>-CH<sub>3</sub>), 18.6 (1 C, 10-O-C(=S)-SCH<sub>3</sub>).

**IR** (diamond ATR):  $\tilde{\nu}$  [cm<sup>-1</sup>] = 2930 (m), 2860 (w), 1596 (w), 1467 (m), 1353 (m), 1301 (w), 1213 (m), 1161 (s), 1055 (s), 975 (m), 935 (m), 806 (m), 754 (m), 674 (m), 571 (s).

**UV/Vis** (THF):  $\lambda_{\max}$  (lg  $\epsilon$ ) = 278 (4.16), 222 (4.36).

**ESI-HRMS**: calculated [C<sub>25</sub>H<sub>29</sub>NO<sub>3</sub>S<sub>3</sub>+Na]<sup>+</sup>: 510.12018

found: 510.12017 (0.02 ppm).

### 3 Experimental procedures and analytical data

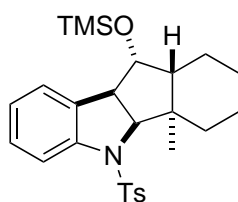

**TLC** [petroleum ether/EtOAc (20:1)]:  $R_f = 0.46$  [vanillin: brown].

**$^1\text{H NMR}$**  (500 MHz,  $\text{CDCl}_3$ ):  $\delta$  [ppm] = 7.65 – 7.62 (m, 1 H, 6-*H*), 7.54 – 7.50 (m, 2 H, *o*- $H_{\text{Ts}}$ ), 7.18 – 7.11 (m, 3 H, 7-*H*, *m*- $H_{\text{Ts}}$ ), 7.05 – 7.02 (m, 1 H, 9-*H*), 6.98 (ddd,  $J = 7.4$  Hz, 7.4 Hz, 1.0 Hz, 1 H, 8-*H*), 4.35 (d,  $J = 8.6$  Hz, 1 H, 4b-*H*), 3.88 (d,  $J = 4.3$  Hz, 1 H, 10-*H*), 3.54 (d,  $J = 8.5$  Hz, 1 H, 9b-*H*), 2.32 (s, 3 H, *p*- $\text{C}_{\text{Ts}}\text{-CH}_3$ ), 1.98 – 1.93 (m, 1 H, 4-*H* (*syn* to 4a- $\text{CH}_3$ )), 1.76 – 1.69 (m, 2 H, 1-*H*, 4-*H* (*anti* to 4a- $\text{CH}_3$ )), 1.67 – 1.60 (m, 1 H, 3-*H*), 1.58 – 1.45 (m, 2 H, 2-*H*, 3-*H*), 1.39 – 1.32 (m, 1 H, 2-*H*), 1.19 (s, 3 H, 4a- $\text{CH}_3$ ), 1.18 – 1.06 (m, 2 H, 1-*H*, 10a-*H*), 0.10 (s, 9 H, 10-O-Si( $\text{CH}_3$ ) $_3$ ).

**$^{13}\text{C NMR}$**  (126 MHz,  $\text{CDCl}_3$ ):  $\delta$  [ppm] = 143.8 (1 C, *p*- $\text{C}_{\text{Ts}}$ ), 143.2 (1 C, C-5a), 134.44 (1 C, C-9a), 134.42 (1 C, *ipso*- $\text{C}_{\text{Ts}}$ ), 129.5 (2 C, *m*- $\text{C}_{\text{Ts}}$ ), 128.0 (1 C, C-7), 127.8 (2 C, *o*- $\text{C}_{\text{Ts}}$ ), 124.9 (1 C, C-9), 124.5 (1 C, C-8), 116.7 (1 C, C-6), 83.0 (1 C, C-10), 76.5 (1 C, C-4b), 56.1 (1 C, C-9b), 48.1 (1 C, C-10a), 46.2 (1 C, C-4a), 36.6 (1 C, C-4), 26.0 (1 C, C-1), 22.1 (1 C, C-2), 21.6 (1 C, *p*- $\text{C}_{\text{Ts}}\text{-CH}_3$ ), 21.55 (1 C, 4a- $\text{CH}_3$ ), 21.51 (1 C, C-3), 0.2 (3 C, 10-O-Si( $\text{CH}_3$ ) $_3$ ).

**IR** (diamond ATR):  $\tilde{\nu}$  [ $\text{cm}^{-1}$ ] = 3052 (w), 2927 (m), 2859 (m), 1597 (w), 1468 (m), 1451 (m), 1351 (m), 1293 (w), 1247 (m), 1159 (s), 1095 (s), 1023 (s), 972 (m), 930 (m), 840 (s), 759 (s), 699 (m), 662 (s), 573 (s).

**UV/Vis** (THF):  $\lambda_{\text{max}}$  ( $\lg \epsilon$ ) = 260 (3.85), 222 (4.32).

**ESI-HRMS**: calculated [ $\text{C}_{26}\text{H}_{35}\text{NO}_3\text{SSi}+\text{Na}$ ] $^+$ : 492.19991  
found: 492.19993 (0.04 ppm).

#### 3.29 Dithiolane **22**

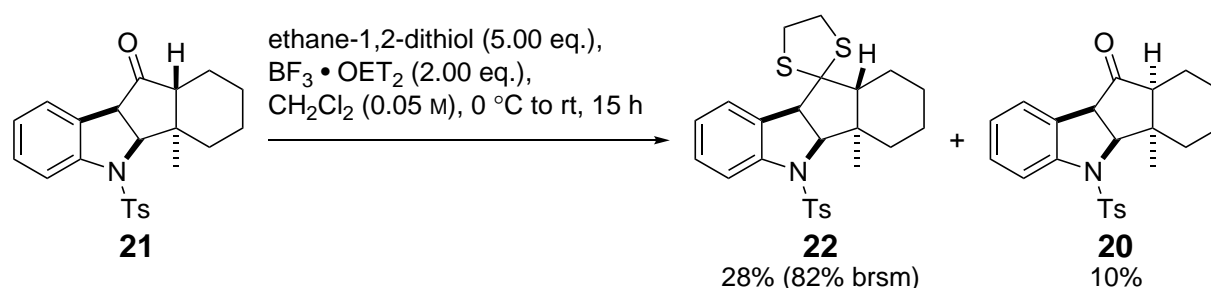

To a solution of ketone **21** (33 mg, 83  $\mu\text{mol}$ , 1.00 eq.) and ethane-1,2-dithiol (34  $\mu\text{L}$ , 417  $\mu\text{mol}$ , 5.00 eq.) in dry  $\text{CH}_2\text{Cl}_2$  (1.6 mL) under argon was added  $\text{BF}_3 \cdot \text{OEt}_2$  (20  $\mu\text{L}$ , 166  $\mu\text{mol}$ , 2.00 eq.) dropwise at 0 °C. The solution was stirred at room temperature for 15 h. The reaction was quenched by the addition of sat.  $\text{NaHCO}_3$  and extracted with  $\text{CH}_2\text{Cl}_2$  (3x20 mL). The combined organic phases were dried over  $\text{MgSO}_4$ , filtered and concentrated. Flash column chromatography on silica gel [petroleum ether/EtOAc (20:1) to (10:1)] afforded dithiolane **22** as a colorless solid (11 mg, 23  $\mu\text{mol}$ , 28%), and a mixture of ketones **21** and **20** as a colorless foam (21 mg, 53  $\mu\text{mol}$ , 64%, **21**:**20** = 5.6:1).

**TLC** [petroleum ether/EtOAc (20:1)]:  $R_f = 0.21$  [vanillin: brown].

**$^1\text{H NMR}$**  (500 MHz,  $\text{CDCl}_3$ ):  $\delta$  [ppm] = 7.64 – 7.61 (m, 1 H, 6-*H*), 7.46 – 7.43 (m, 2 H, *o*- $H_{\text{Ts}}$ ), 7.34 – 7.31 (m, 1 H, 9-*H*), 7.22 – 7.18 (m, 1 H, 7-*H*), 7.12 – 7.08 (m, 2 H, *m*- $H_{\text{Ts}}$ ), 6.97 (td,

### 3 Experimental procedures and analytical data

$J = 7.6$  Hz, 1.1 Hz, 1 H, 8-*H*), 4.34 (d,  $J = 8.7$  Hz, 1 H, 4b-*H*), 4.03 (d,  $J = 8.9$  Hz, 1 H, 9b-*H*), 3.32 – 3.17 (m, 1 H, 10-S-CH<sub>2</sub>-CH<sub>2</sub>-S-10 (*syn* to 4a-CH<sub>3</sub>)), 3.26 – 3.24 (m, 1 H, 10-S-CH<sub>2</sub>-CH<sub>2</sub>-S-10 (*syn* to 4a-CH<sub>3</sub>)), 3.15 – 3.06 (m, 2 H, 10-S-CH<sub>2</sub>-CH<sub>2</sub>-S-10 (*anti* to 4a-CH<sub>3</sub>)), 2.31 (s, 3 H, *p*-C<sub>Ts</sub>-CH<sub>3</sub>), 2.11 – 2.04 (m, 1 H, 4-*H* (*syn* to 4a-CH<sub>3</sub>)), 1.83 – 1.64 (m, 4 H, 1-*H*, 2-*H* (*syn* to 4a-CH<sub>3</sub>), 3-*H*, 4-*H* (*anti* to 4a-CH<sub>3</sub>)), 1.61 (dd,  $J = 11.9$  Hz, 2.5 Hz, 1 H, 10a-*H*), 1.59 – 1.48 (m, 2 H, 1-*H*, 3-*H*), 1.26 (s, 3 H, 4a-CH<sub>3</sub>), 1.23 – 1.11 (m, 1 H, 2-*H* (*anti* to 2-H)).

**<sup>13</sup>C NMR** (126 MHz, CDCl<sub>3</sub>):  $\delta$  [ppm] = 144.0 (1 C, *p*-C<sub>Ts</sub>), 143.3 (1 C, C-5a), 133.8 (1 C, *ipso*-C<sub>Ts</sub>), 132.4 (1 C, C-9a), 129.7 (1 C, C-9), 129.4 (2 C, *m*-C<sub>Ts</sub>), 128.5 (1 C, C-7), 127.9 (2 C, *o*-C<sub>Ts</sub>), 123.1 (1 C, C-8), 116.0 (1 C, C-6), 78.3 (1 C, C-10), 76.1 (1 C, C-4b), 61.8 (1 C, C-9b), 55.1 (1 C, C-10a), 45.2 (1 C, C-4a), 41.2 (1 C, 10-S-CH<sub>2</sub> (*syn* to 4a-CH<sub>3</sub>)), 38.4 (1 C, 10-S-CH<sub>2</sub> (*anti* to 4a-CH<sub>3</sub>)), 37.6 (1 C, C-4), 25.9 (1 C, C-2), 22.4 (1 C, C-1), 21.7 (1 C, C-3), 21.6 (1 C, *p*-C<sub>Ts</sub>-CH<sub>3</sub>), 21.3 (1 C, 4a-CH<sub>3</sub>).

**IR** (diamond ATR):  $\tilde{\nu}$  [cm<sup>-1</sup>] = 2921 (m), 2857 (w), 1594 (w), 1466 (m), 1343 (m), 1242 (w), 1158 (s), 1093 (m), 1030 (m), 974 (m), 931 (m), 871 (w), 854 (w), 805 (m), 756 (m), 690 (m), 673 (m), 656 (m), 619 (w), 568 (s).

**UV/Vis** (THF):  $\lambda_{\max}$  (lg  $\epsilon$ ) = 260 (3.73), 222 (4.23).

**ESI-HRMS**: calculated [C<sub>25</sub>H<sub>29</sub>NO<sub>2</sub>S<sub>3</sub>+Na]<sup>+</sup>: 494.12526

found: 494.12507 (0.38 ppm).

#### 3.30 *trans*-Hydrindane **23**

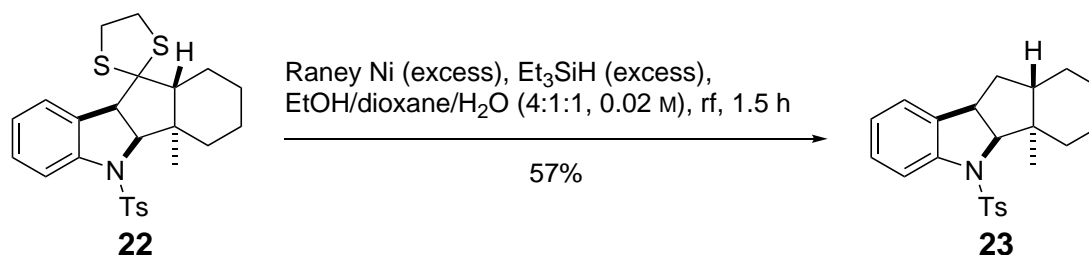

To a solution of dithiolane **22** (11 mg, 23  $\mu$ mol, 1.00 eq.) and Et<sub>3</sub>SiH (50  $\mu$ L, 313  $\mu$ mol, 13.6 eq.) in EtOH (800  $\mu$ L) and dioxane (230  $\mu$ L) under argon was added a slurry of Raney Ni in H<sub>2</sub>O (230  $\mu$ L, 672 mg, this equals approx.  $1.167 \cdot (672 \text{ mg} - (230 \mu\text{L} \cdot 0.997 \text{ mg } \mu\text{L}^{-1})) = 470 \text{ mg Ni}$ , 8.01 mmol, 348 eq.). The reaction was stirred rapidly under reflux for 1.5 h. The mixture was filtered through Celite 545 (rinsed with CH<sub>2</sub>Cl<sub>2</sub>) and the filtrate dried over MgSO<sub>4</sub>, filtered and concentrated. Flash column chromatography on silica gel [petroleum ether/EtOAc (30:1)] afforded an inseparable mixture (6 mg) of *trans*-hydrindane **23** and two other products (1.0:0.1:0.1, <sup>1</sup>H NMR). [Based on analysis of the mixture (NMR and MS), we preliminary assigned these side-products as the C-10/C-10a dehydrogenated product and the mono-desulfurized starting material.]

To a solution of the crude product in CH<sub>2</sub>Cl<sub>2</sub> (600  $\mu$ L) was added 70% *m*-CPBA (6 mg, 24  $\mu$ mol, 1.05 eq.). The solution was stirred for 2 h at room temperature. The reaction was quenched by the addition NaHCO<sub>3</sub> and extracted with CH<sub>2</sub>Cl<sub>2</sub> (3x20 mL). The combined organic phases were dried over MgSO<sub>4</sub>, filtered and concentrated. Flash column chromatography on silica gel [petroleum ether/EtOAc (30:1)] afforded *trans*-hydrindane **23** as a colorless solid (5 mg, 13  $\mu$ mol, 57%).

**TLC** [petroleum ether/EtOAc (10:1)]:  $R_f = 0.53$  [vanillin: brown].

### 3 Experimental procedures and analytical data

**<sup>1</sup>H NMR** (500 MHz, CDCl<sub>3</sub>): δ [ppm] = 7.63 – 7.60 (m, 1 H, 6-*H*), 7.53 – 7.49 (m, 2 H, *o*-*H*<sub>Ts</sub>), 7.17 – 7.10 (m, 3 H, 7-*H*, *m*-*H*<sub>Ts</sub>), 7.01 – 6.97 (m, 2 H, 8-*H*, 9-*H*), 4.15 (d, *J* = 8.4 Hz, 1 H, 4b-*H*), 3.57 (dd, *J* = 8.2 Hz, 8.2 Hz, 1 H, 9b-*H*), 2.32 (s, 3 H, *p*-C<sub>Ts</sub>-CH<sub>3</sub>), 2.02 – 1.94 (m, 1 H, 4-*H* (*syn* to 4a-CH<sub>3</sub>)), 1.80 – 1.69 (m, 2 H, 10-*H* (*syn* to 4a-CH<sub>3</sub>), 4-*H* (*anti* to 4a-CH<sub>3</sub>)), 1.69 – 1.61 (m, 2 H, 2-*H*, 3-*H*), 1.59 – 1.42 (m, 3 H, 1-*H*, 3-*H*, 10-*H* (*anti* to 4a-CH<sub>3</sub>)), 1.30 – 1.02 (m, 3 H, 1-*H*, 2-*H*, 10a-*H*), 0.90 (s, 3 H, 4a-CH<sub>3</sub>).

**<sup>13</sup>C NMR** (126 MHz, CDCl<sub>3</sub>): δ [ppm] = 143.8 (1 C, *p*-C<sub>Ts</sub>), 143.4 (1 C, C-5a), 137.3 (1 C, C-9a), 134.5 (1 C, *ipso*-C<sub>Ts</sub>), 129.5 (2 C, *m*-C<sub>Ts</sub>), 127.7 (2 C, *o*-C<sub>Ts</sub>), 127.6 (1 C, C-7), 124.9 (1 C, C-9), 124.7 (1 C, C-8), 116.3 (1 C, C-6), 76.2 (1 C, C-4b), 45.7 (1 C, C-4a), 43.5 (1 C, C-9b), 42.8 (1 C, C-10a), 37.9 (1 C, C-10), 34.8 (1 C, C-4), 26.1 (1 C, C-2), 25.3 (1 C, C-1), 21.6 (1 C, *p*-C<sub>Ts</sub>-CH<sub>3</sub>), 21.5 (1 C, C-3), 18.4 (1 C, 4a-CH<sub>3</sub>).

**IR** (diamond ATR):  $\tilde{\nu}$  [cm<sup>-1</sup>] = 2926 (m), 2860 (m), 1596 (w), 1465 (m), 1384 (w), 1344 (s), 1292 (w), 1259 (w), 1224 (w), 1156 (s), 1093 (m), 1029 (m), 982 (m), 907 (m), 809 (m), 743 (s), 667 (s), 616 (m), 569 (s).

**UV/Vis** (THF):  $\lambda_{\max}$  (lg  $\epsilon$ ) = 260 (3.74).

**ESI-HRMS**: calculated [C<sub>23</sub>H<sub>27</sub>NO<sub>2</sub>S+Na]<sup>+</sup>: 404.16547  
found: 404.16553 (0.15 ppm).

#### 3.31 *trans*-Hydrindane **24**

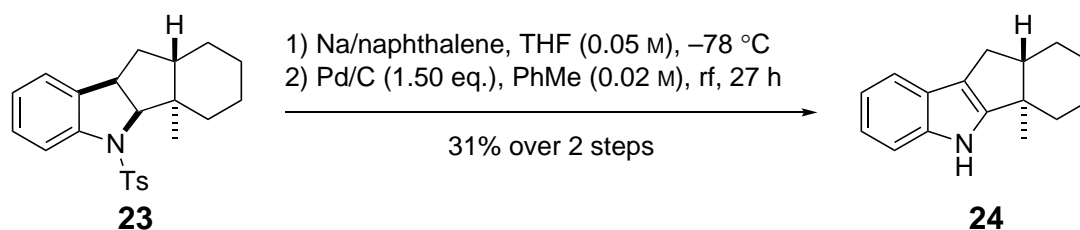

Sulfonamide **23** (44 mg, 115  $\mu$ mol, 1.00 eq.) was dissolved in dry THF (2.3 mL) and cooled to -78 °C. Separately, freshly cut sodium (80 mg, 3.46 mmol, 30.0 eq.) was added to a solution of naphthalene (222 mg, 1.73 mmol, 15.0 eq.) in dry THF (9 mL). This suspension was treated by sonication for 30 min, which gave a deep green solution (~0.2 M). The Na/naphthalene solution was added dropwise to the starting material at -78 °C. After full consumption of the starting material (monitored by TLC), the reaction was quenched by the addition of sat. NH<sub>4</sub>Cl and extracted with TBME (3x20 mL). The combined organic phases were washed with sat. NaCl, dried over MgSO<sub>4</sub>, filtered, and concentrated. Flash chromatography on silica gel [petroleum ether/EtOAc (60:1) to (30:1)] afforded the crude product (22 mg).

To a solution of the crude product in dry PhMe (5.8 mL) under argon was added Pd/C (10 wt% Pd on C, 184 mg, 173  $\mu$ mol, 1.50 eq.). The mixture was degassed (three freeze-pump-thaw cycles) and back filled with argon. The mixture was stirred for 27 h under reflux and then filtered through Celite 545 (rinsed with TBME) and the filtrate concentrated. Flash column chromatography on silica gel [petroleum ether/EtOAc (30:1)] afforded *trans*-hydrindane **24** as a colorless solid (8 mg, 36  $\mu$ mol, 31% over 2 steps).

**TLC** [petroleum ether/EtOAc (20:1)]: *R*<sub>f</sub> = 0.43 [vanillin: brown].

**<sup>1</sup>H NMR** (500 MHz, C<sub>6</sub>D<sub>6</sub>): δ [ppm] = 7.65 – 7.60 (m, 1 H, 9-*H*), 7.26 – 7.20 (m, 2 H, 7-*H*, 8-*H*), 7.14 – 7.09 (m, 1 H, 6-*H*), 6.62 (s, 1 H, 5-*H*), 2.64 (dd, *J* = 13.3 Hz, 6.3 Hz, 1 H, 10-*H* (*anti* to 4a-CH<sub>3</sub>)), 2.37 (dd, *J* = 13.1 Hz, 11.0 Hz, 1 H, 10-*H* (*syn* to 4a-CH<sub>3</sub>)), 2.26 – 2.17 (m, 1 H,

### 3 Experimental procedures and analytical data

10a-*H*), 1.83 – 1.77 (m, 1 H, 4-*H* (*syn* to 4a-CH<sub>3</sub>)), 1.74 – 1.67 (m, 1 H, 2-*H*), 1.60 – 1.45 (m, 5 H, 1-*H*, 3*H*, 4-*H* (*anti* to 4a-CH<sub>3</sub>)), 1.30 – 1.21 (m, 1 H, 2-*H*), 0.87 (s, 3 H, 4a-CH<sub>3</sub>).

**<sup>13</sup>C NMR** (126 MHz, C<sub>6</sub>D<sub>6</sub>):  $\delta$  [ppm] = 152.5 (1 C, C-4b), 140.0 (1 C, C-5a), 125.9 (1 C, C-9a), 120.6 (1 C, C-7), 120.0 (1 C, C-8), 119.1 (1 C, C-9), 116.9 (1 C, C-9b), 112.0 (1 C, C-6), 55.9 (1 C, C-10a), 42.3 (1 C, C-4a), 35.3 (1 C, C-4), 28.3 (1 C, C-10), 27.2 (1 C, C-2), 25.0 (1 C, C-1), 21.7 (1 C, C-3), 17.2 (1 C, 4a-CH<sub>3</sub>).

**IR** (diamond ATR):  $\tilde{\nu}$  [cm<sup>-1</sup>] = 3400 (m), 3056 (w), 2923 (m), 2854 (m), 1656 (w), 1608 (w), 1452 (m), 1366 (w), 1301 (m), 1254 (m), 1150 (w), 1094 (m), 1019 (m), 973 (w), 923 (w), 868 (w), 805 (m), 741 (m), 704 (m), 657 (w), 614 (w), 579 (w).

**UV/Vis** (THF):  $\lambda_{\max}$  (lg  $\epsilon$ ) = 281 (3.69), 230 (4.36).

**ESI-HRMS**: calculated [C<sub>16</sub>H<sub>19</sub>N-H]<sup>-</sup>: 224.14447

found: 224.14465 (0.80 ppm).



4 NMR spectra of new compounds

**(1*H*-Benzo[*d*][1,2,3]triazol-1-yl)(2-methylcyclohex-1-en-1-yl)methanone (5)**

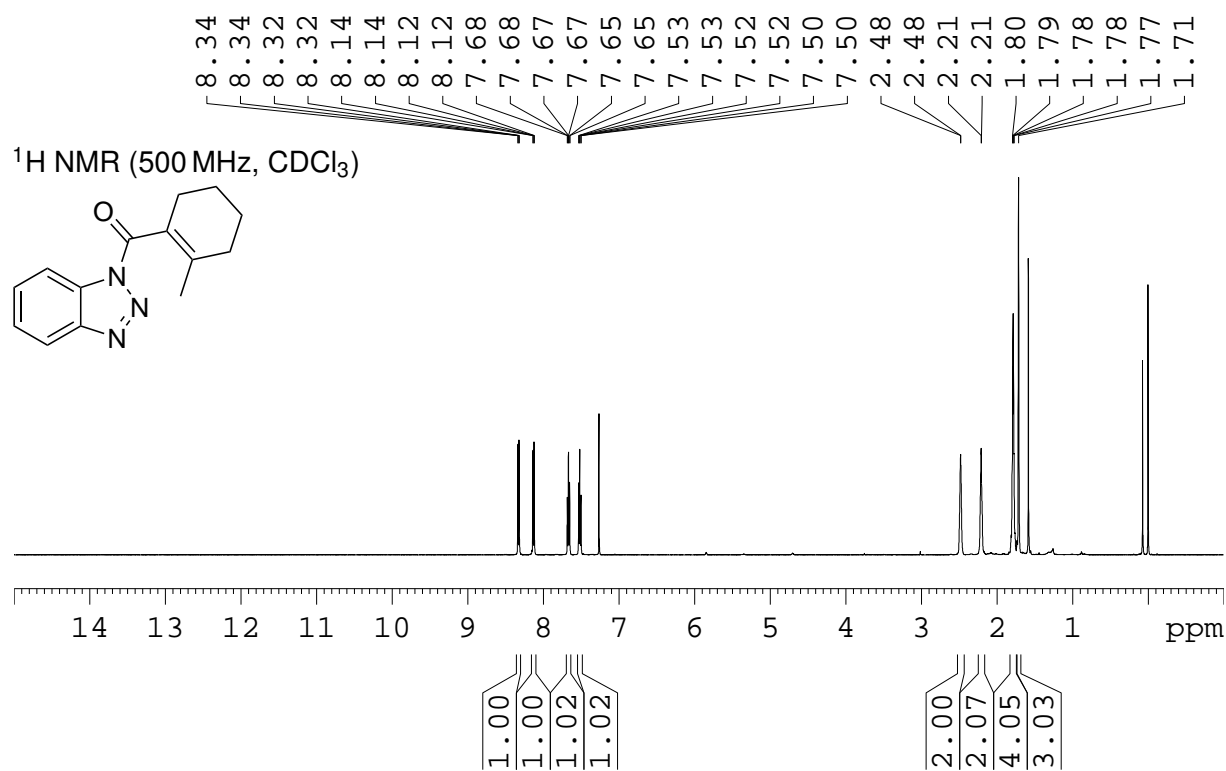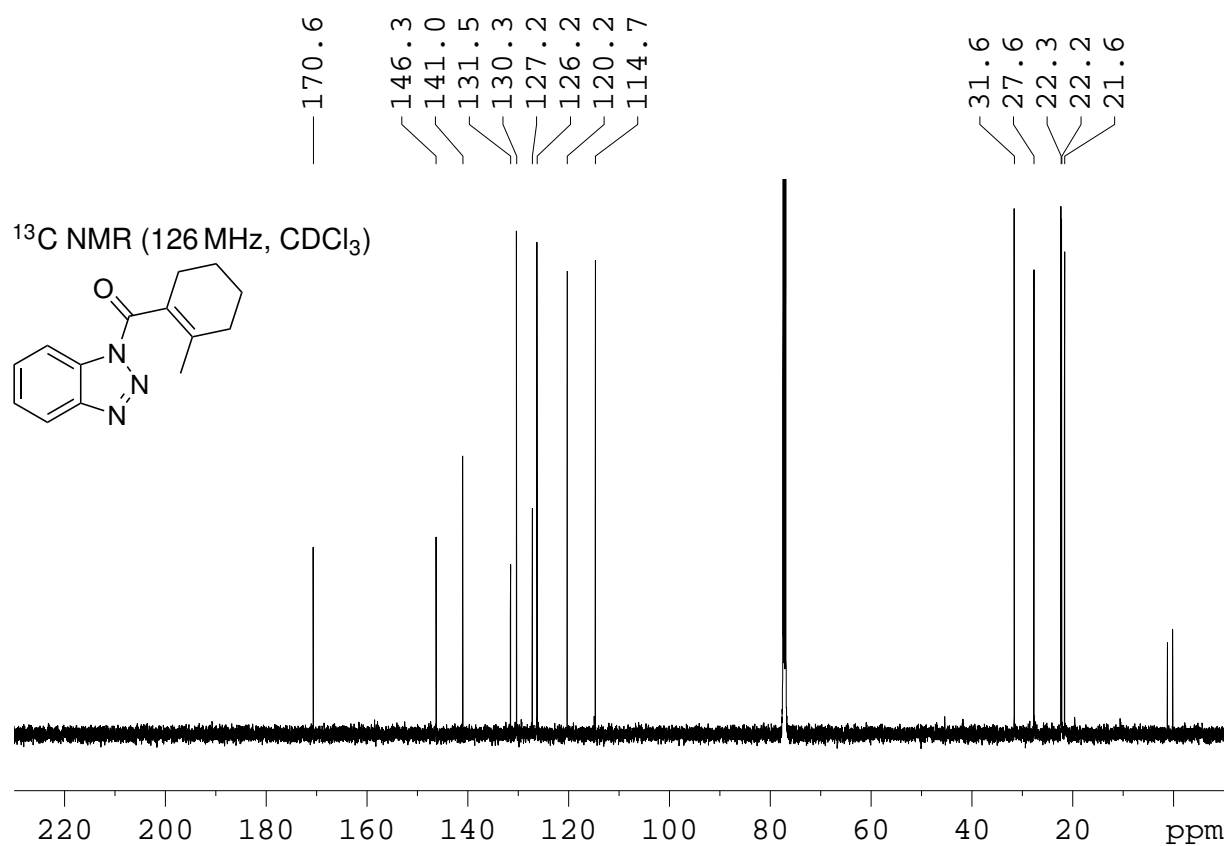

4 NMR spectra of new compounds

**(1*H*-Indol-3-yl)(2-methylcyclohex-1-en-1-yl)methanone (6)**

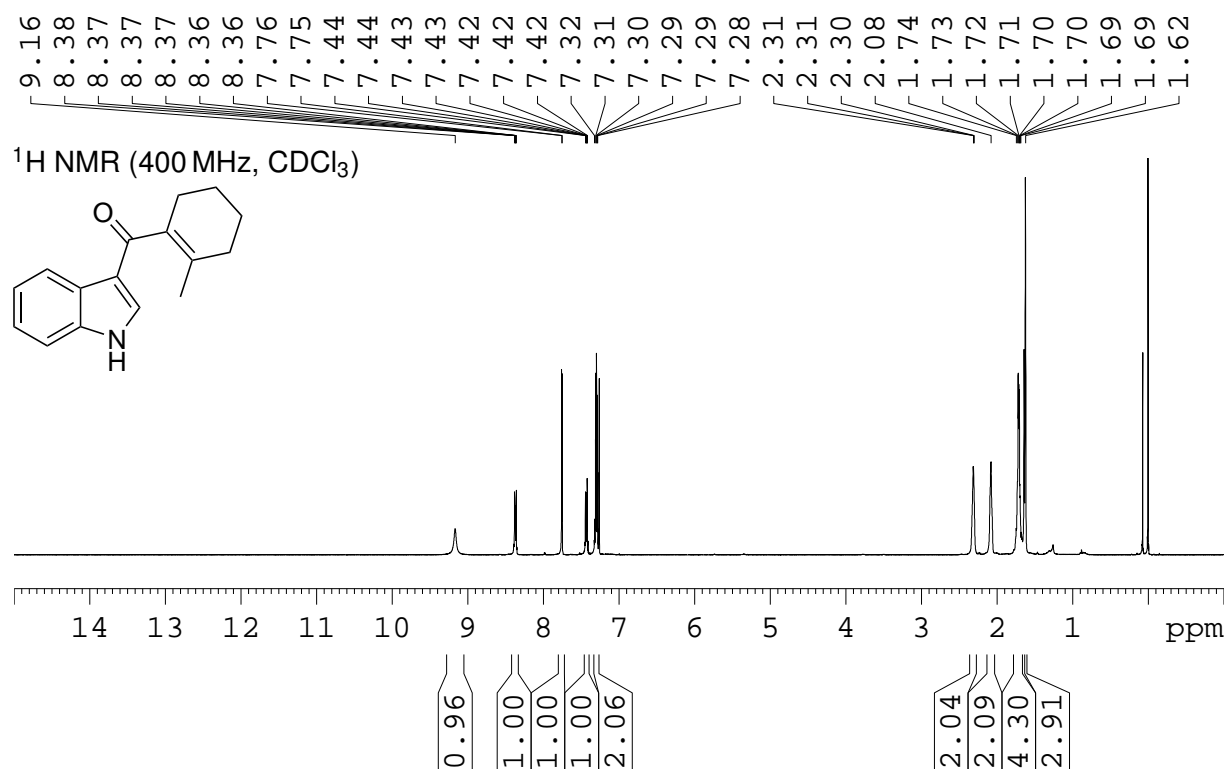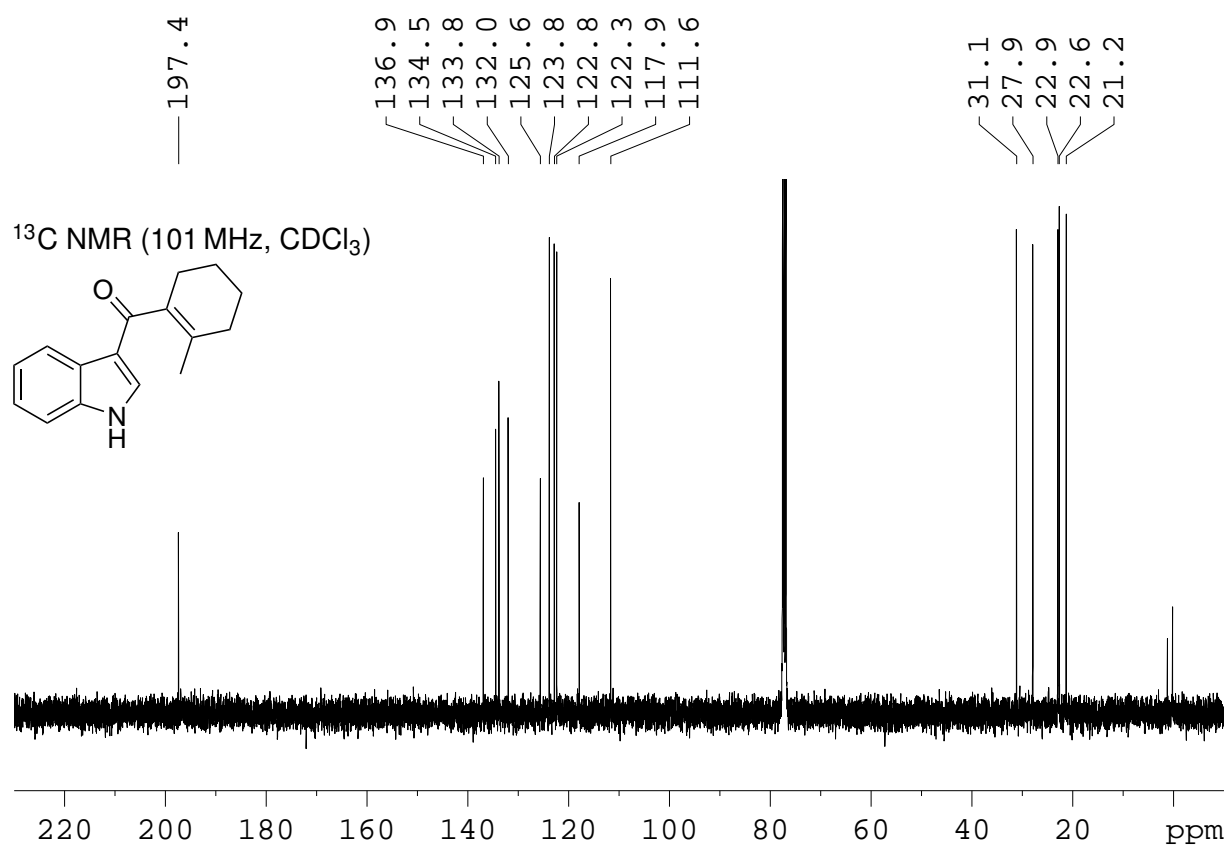

4 NMR spectra of new compounds

**(1-Methyl-1*H*-indol-3-yl)(2-methylcyclohex-1-en-1-yl)methanone (S20)**

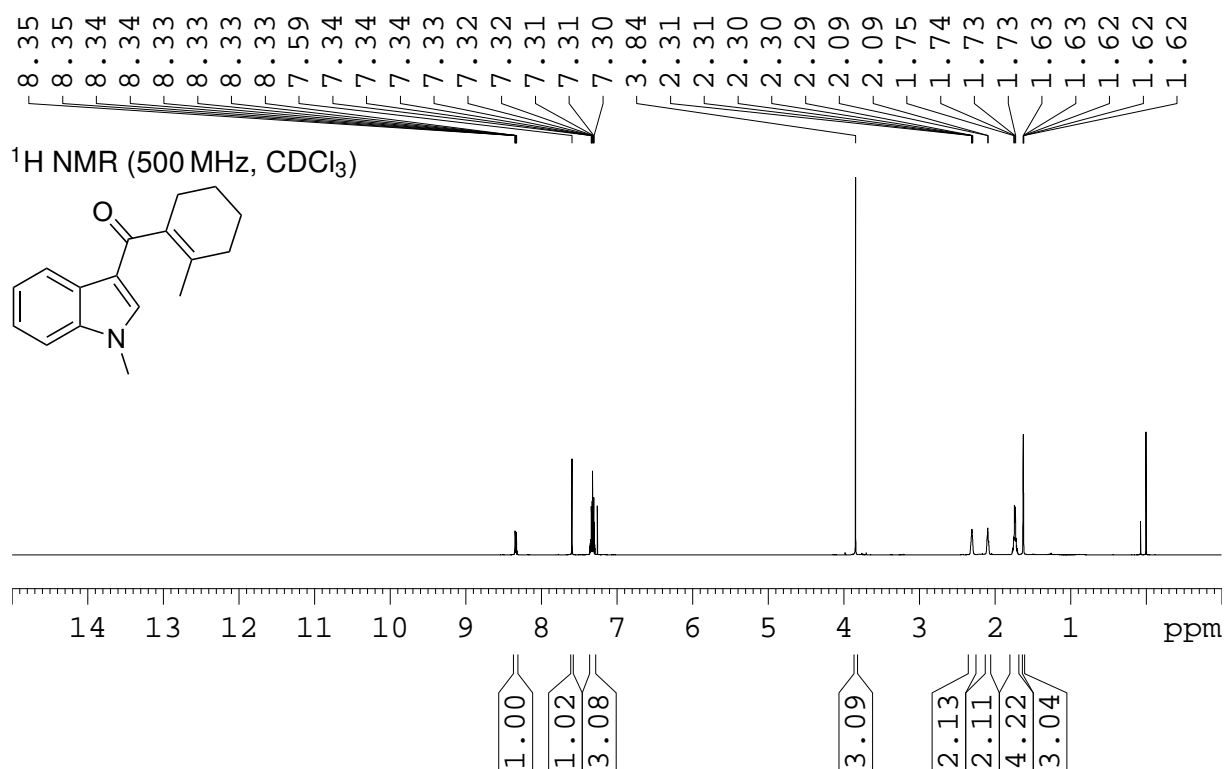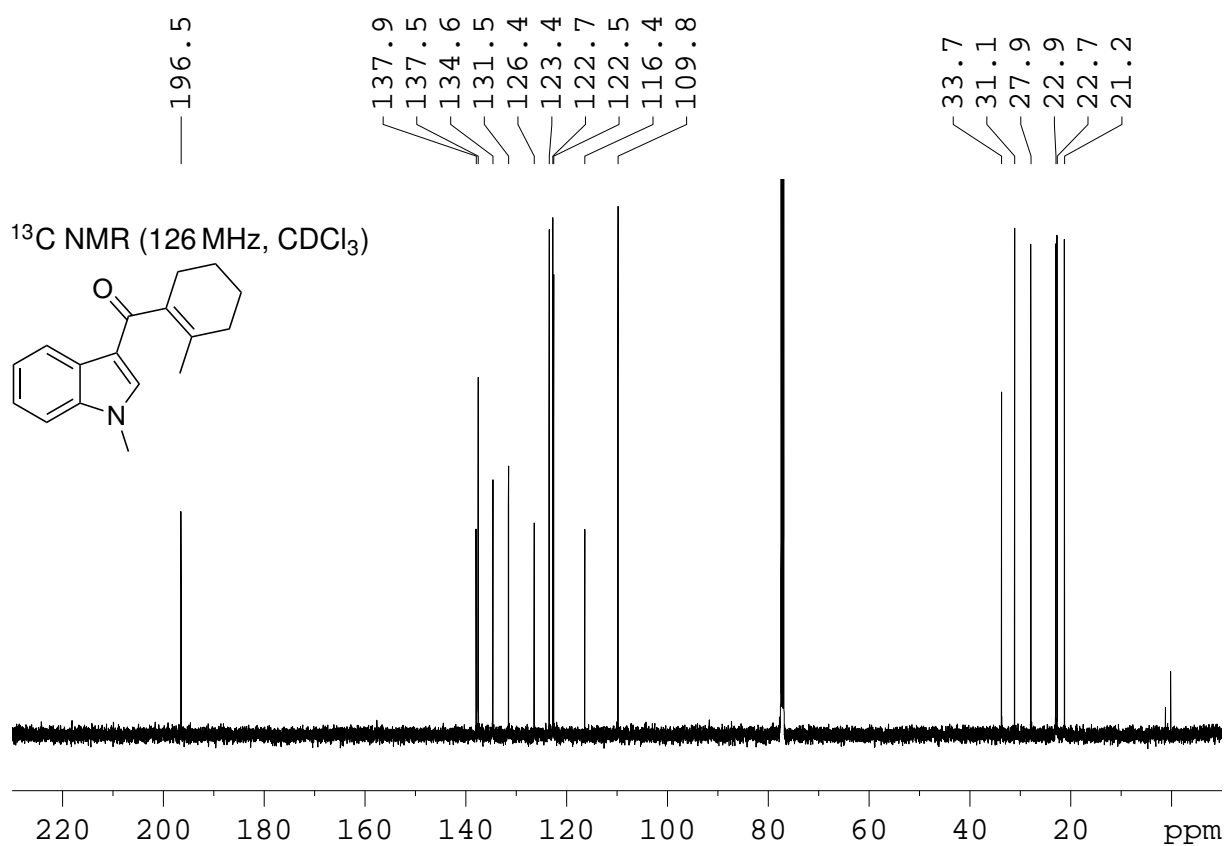

4 NMR spectra of new compounds

***cis*-4a-Methyl-1,3,4,4a,5,10a-hexahydroindeno[1,2-*b*]indol-10(2*H*)-one (7)**

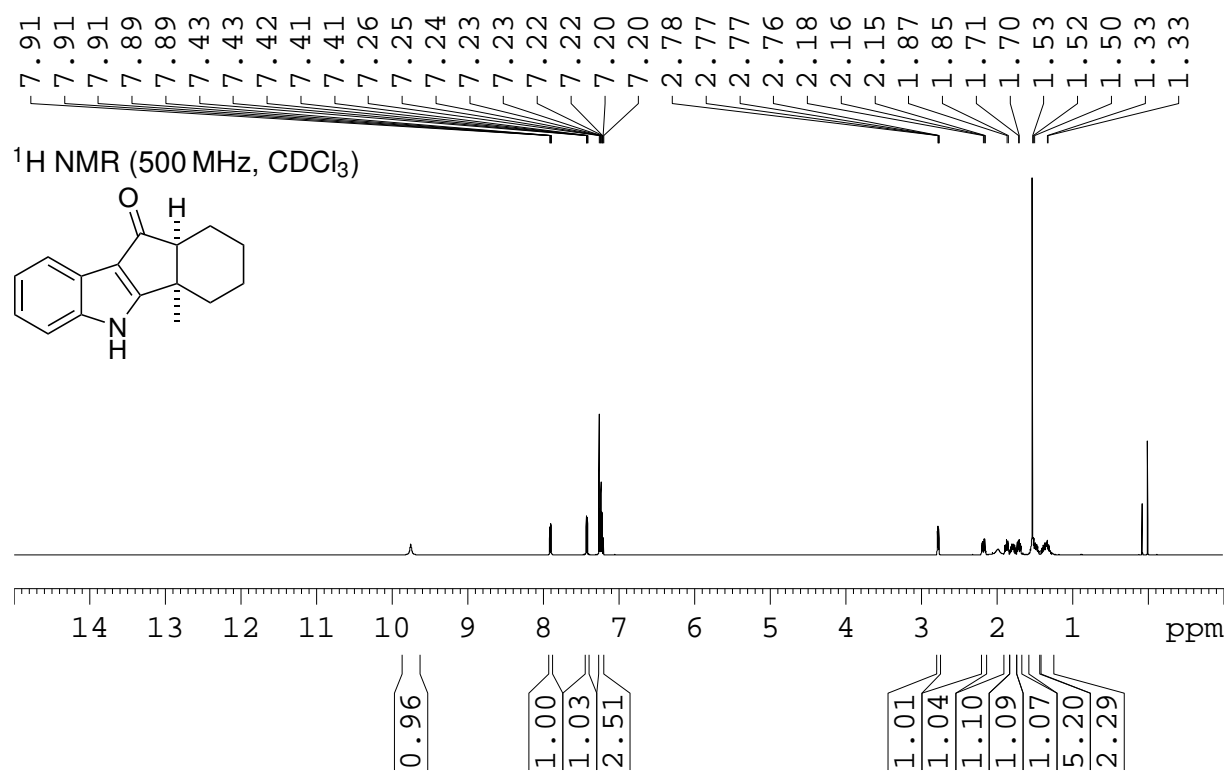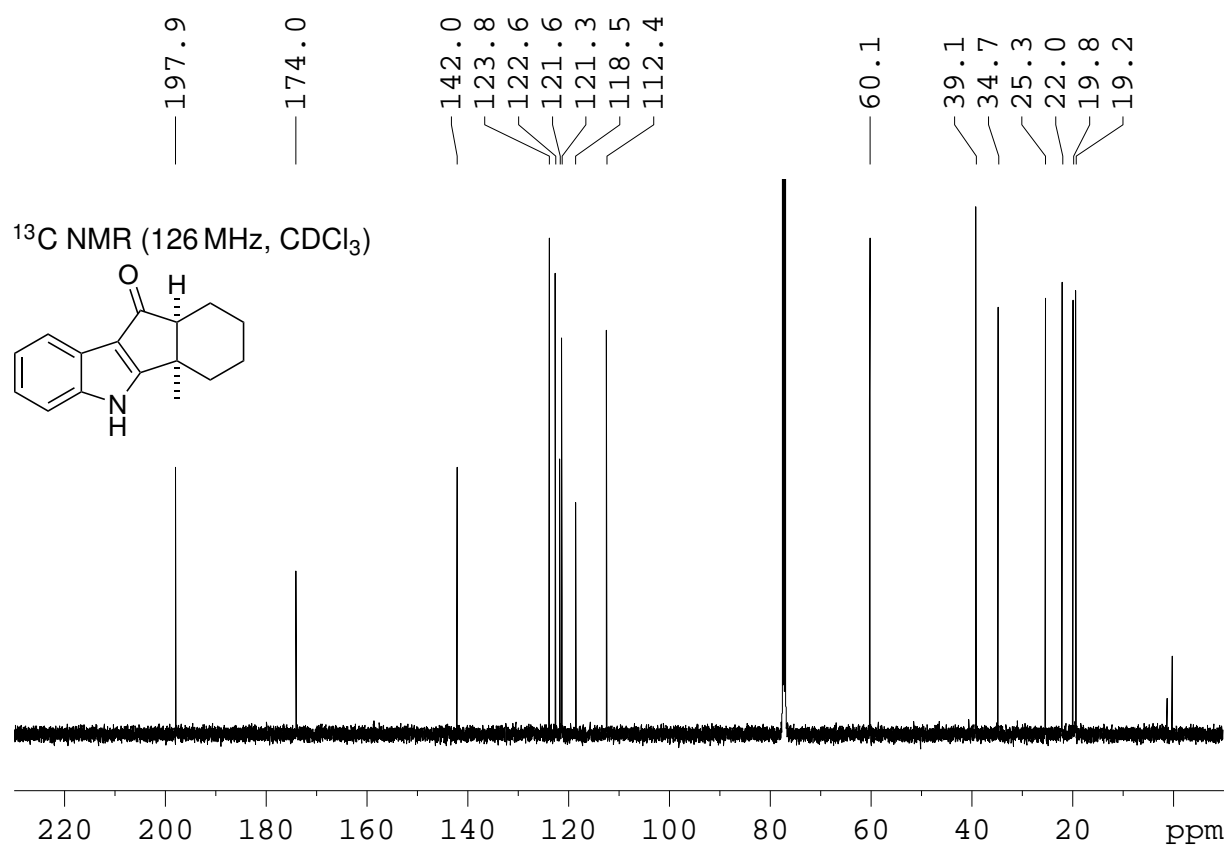

4 NMR spectra of new compounds

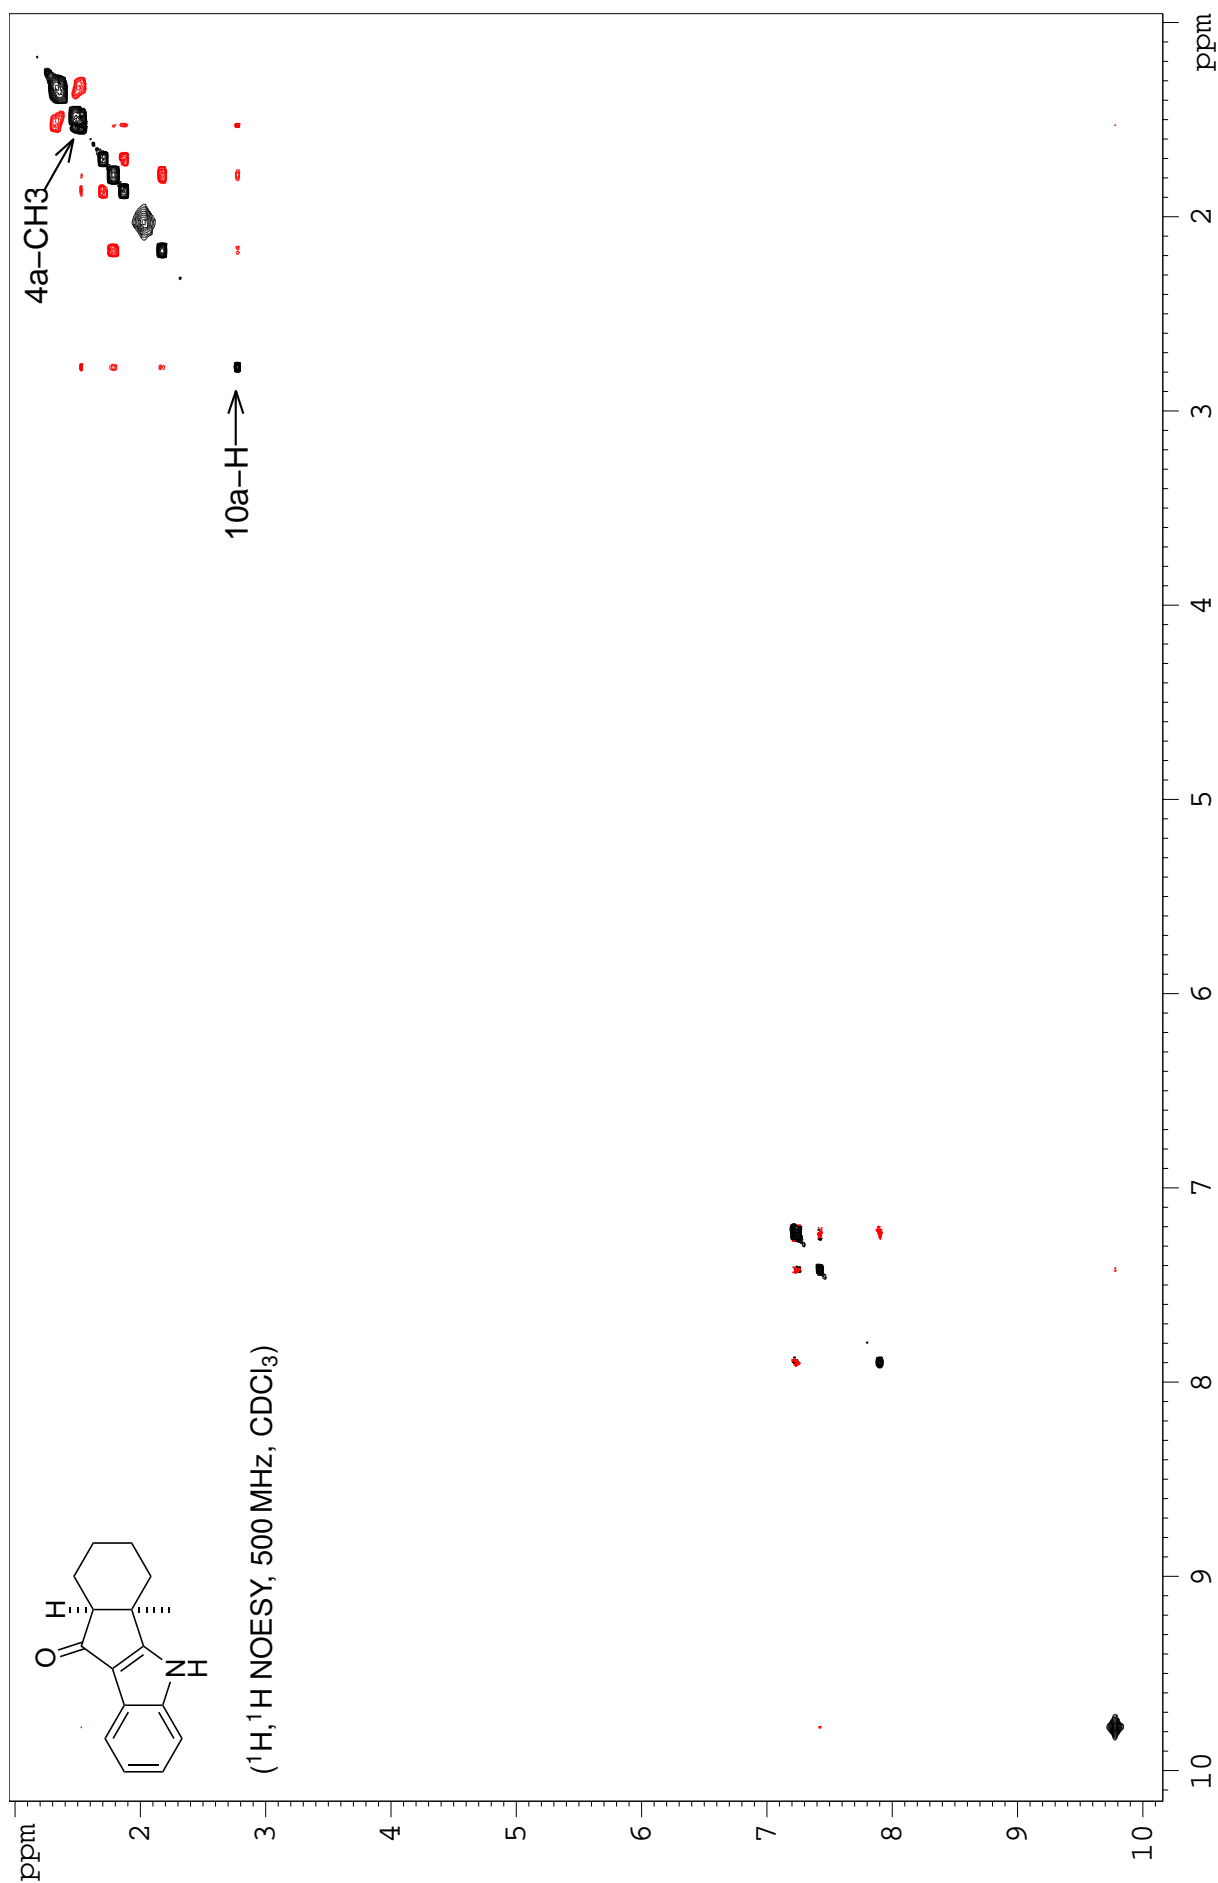

4 NMR spectra of new compounds

***cis*-4a,5-Dimethyl-1,3,4,4a,5,10a-hexahydroindeno[1,2-*b*]indol-10(2*H*)-one (S21)**

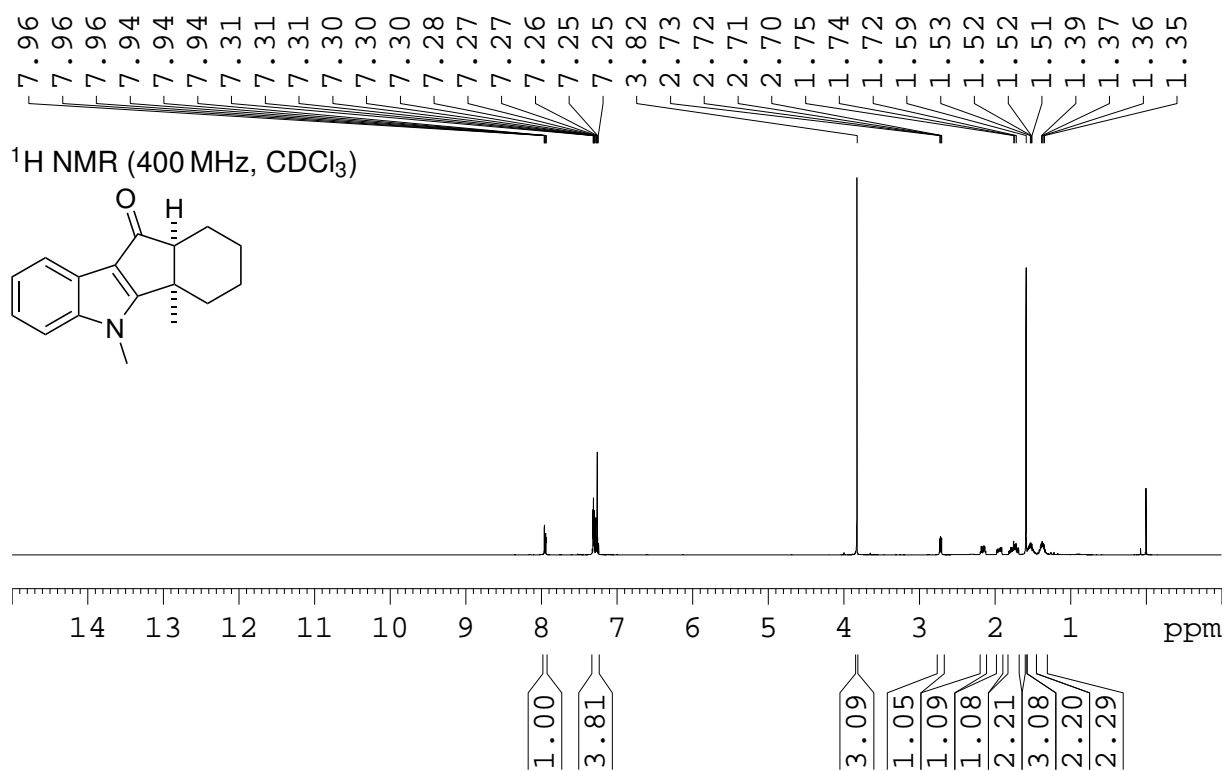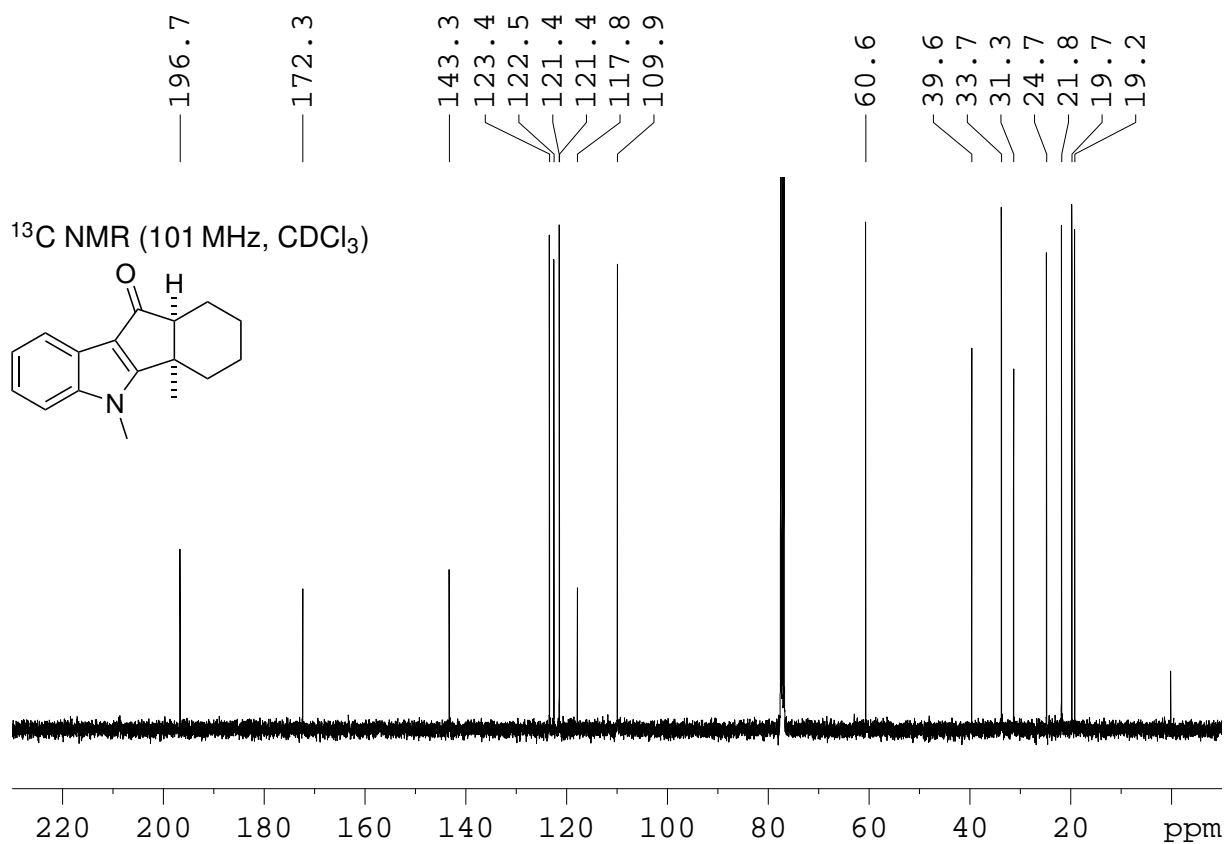

4 NMR spectra of new compounds

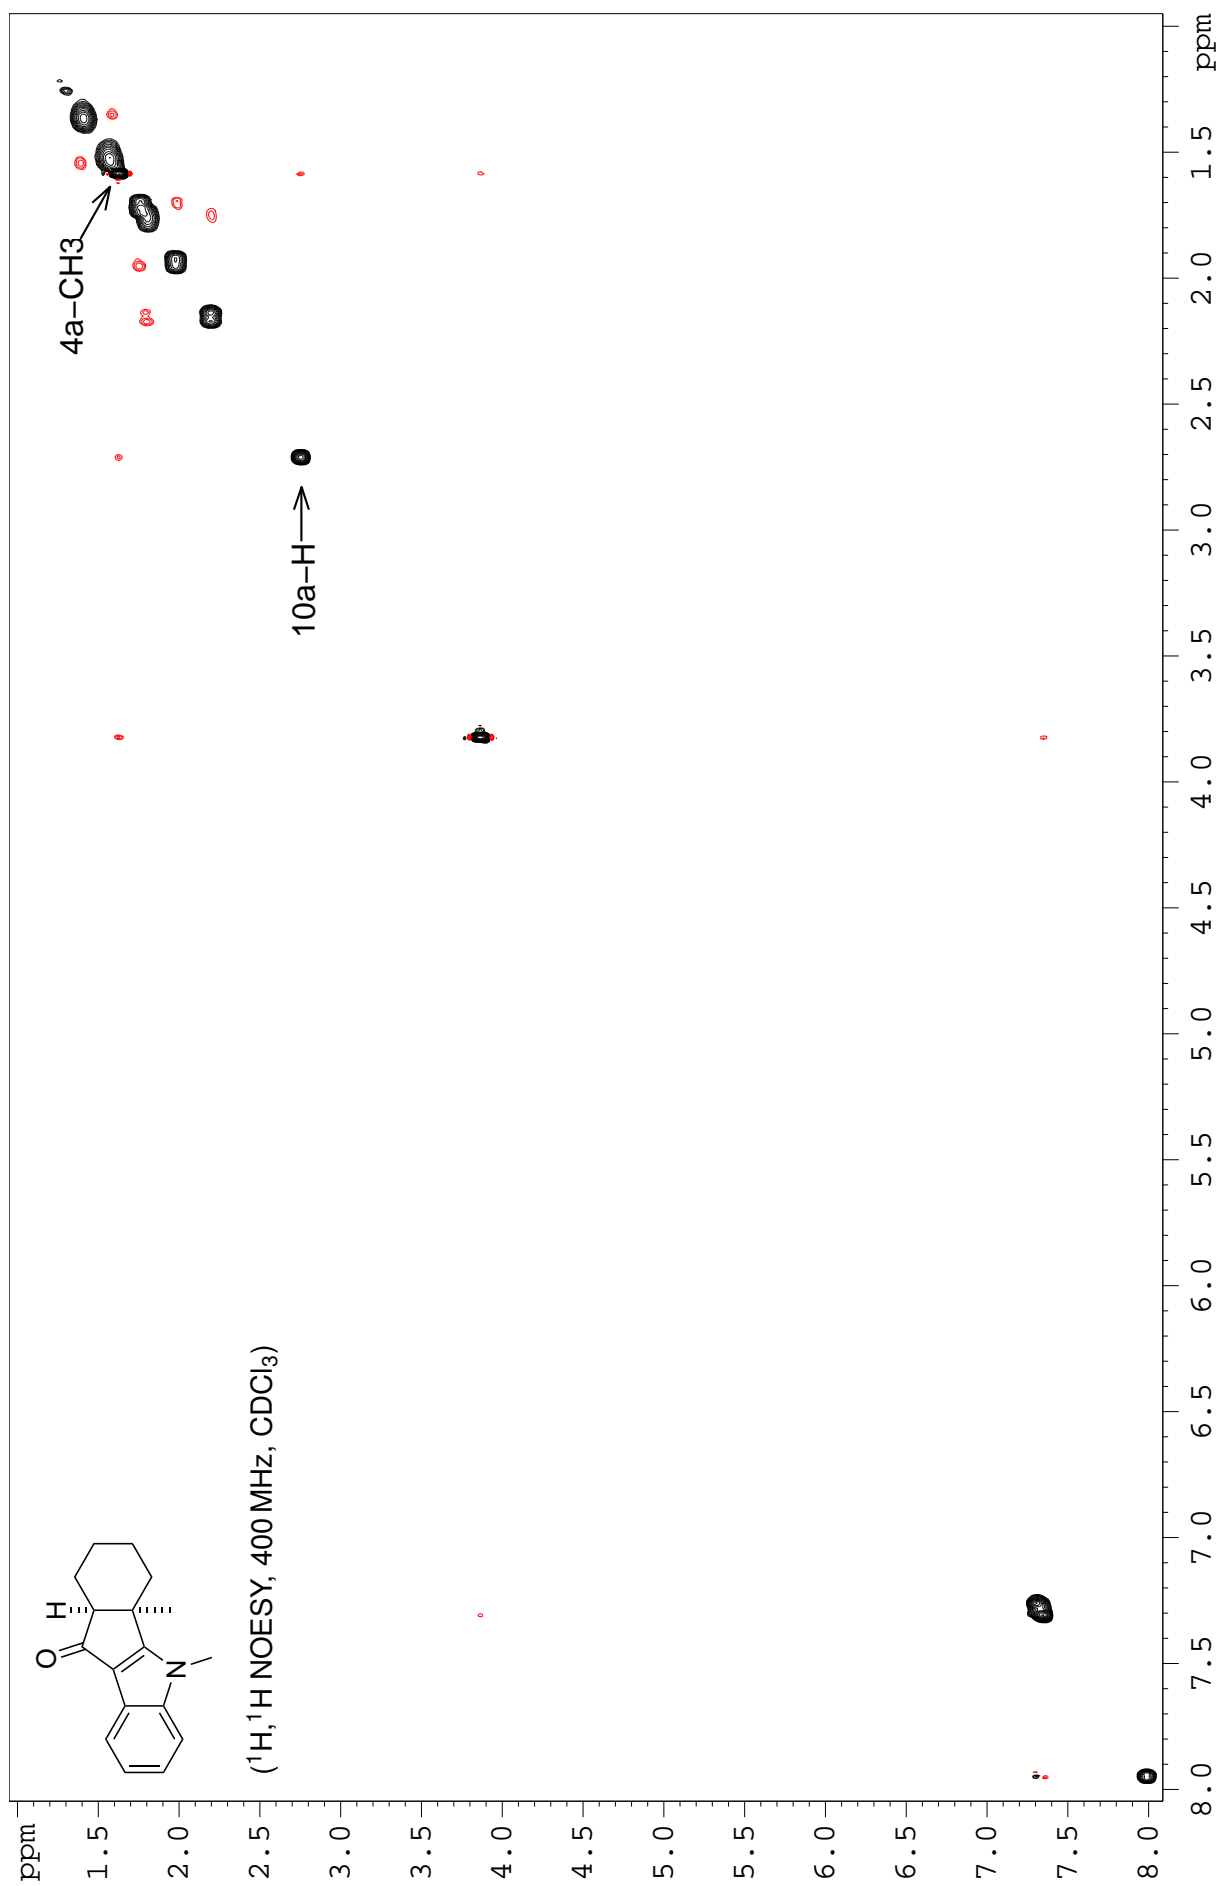

4 NMR spectra of new compounds

**3-((2-Methylcyclohex-1-en-1-yl)methyl)-1H-indole (S2)**

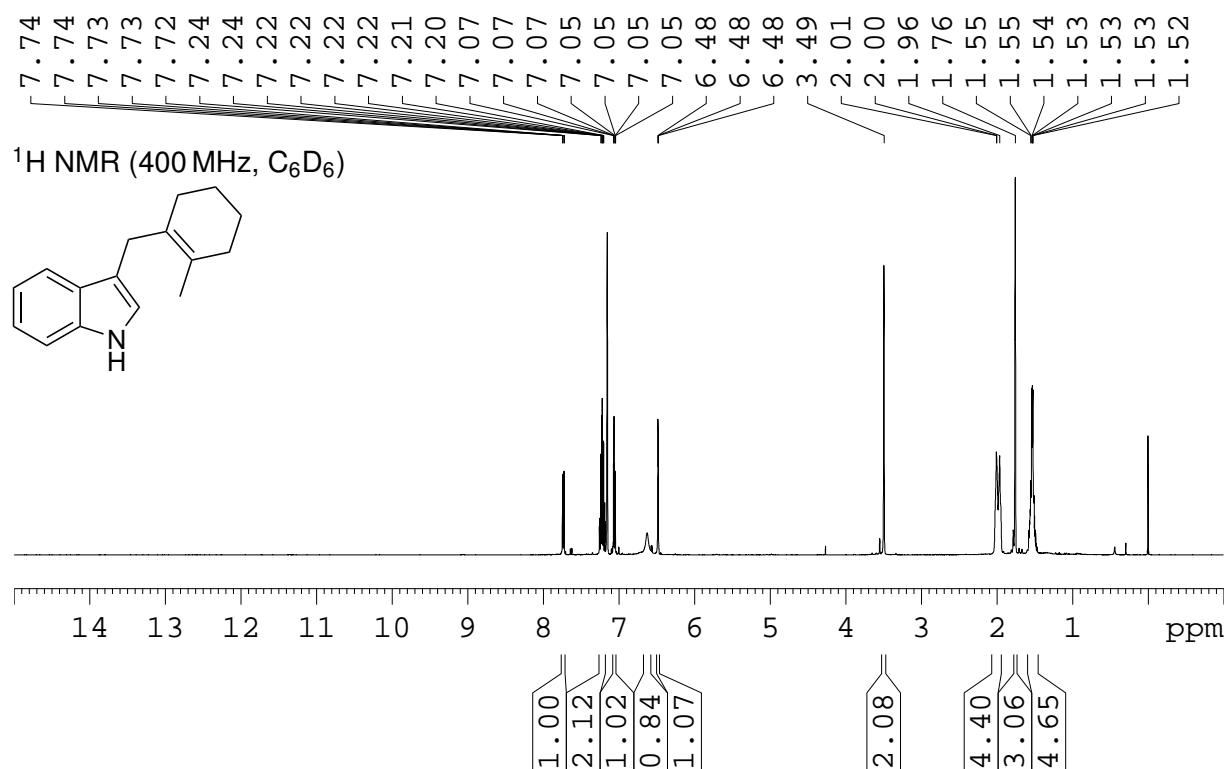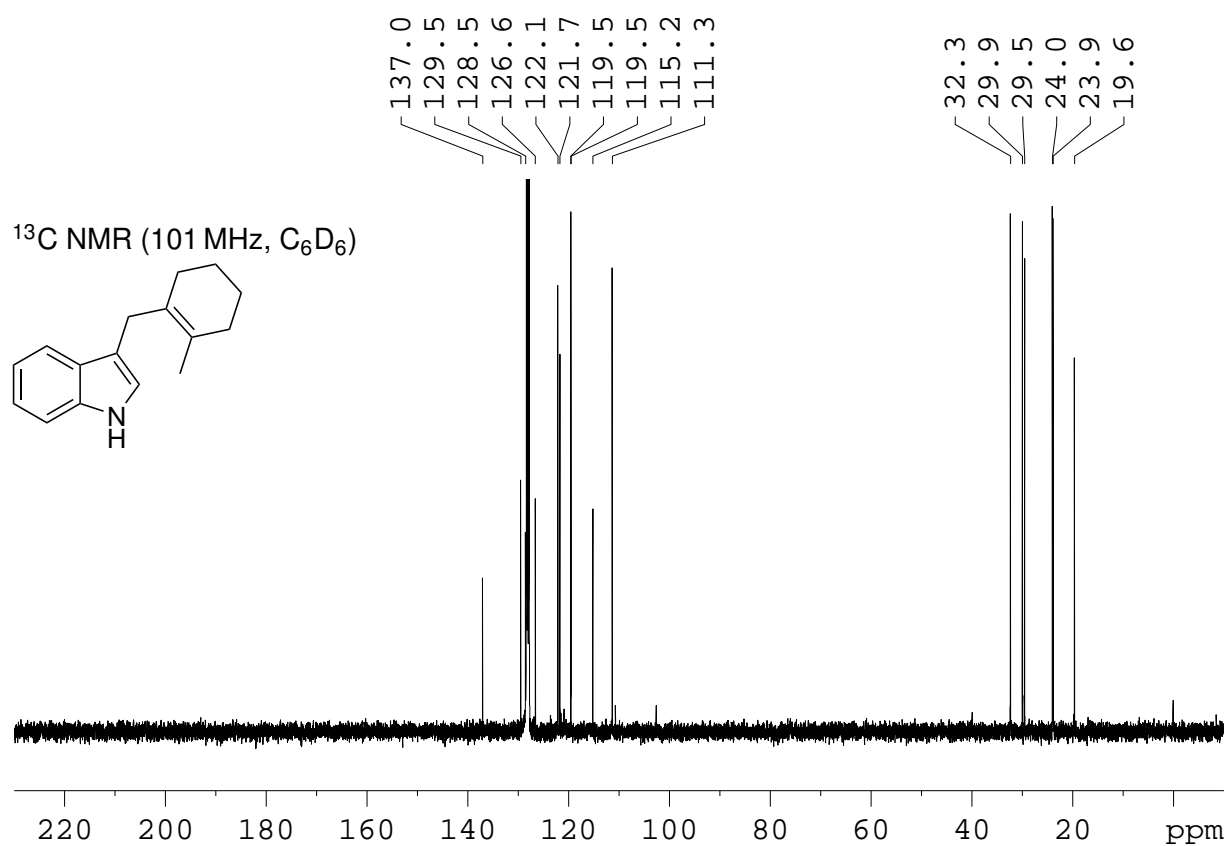



4 NMR spectra of new compounds

**3-((2-Methylcyclohex-1-en-1-yl)methyl)-1-tosyl-1H-indole (S3)**

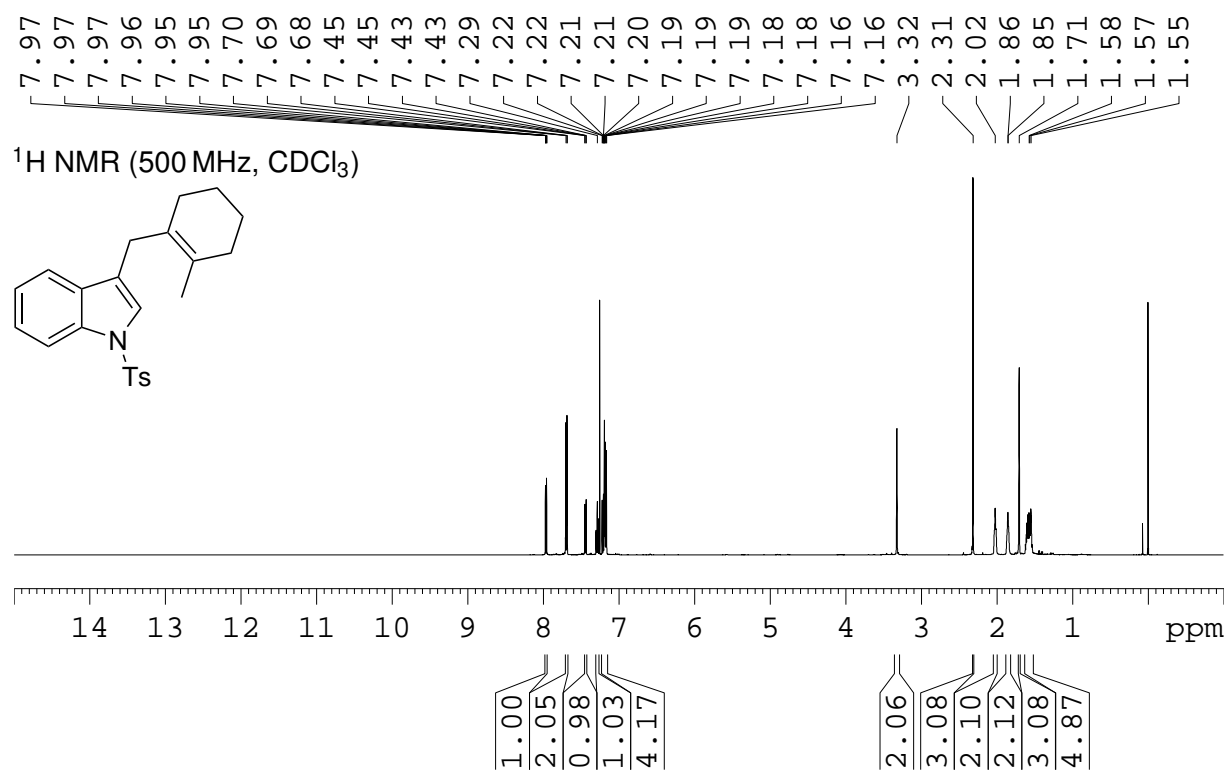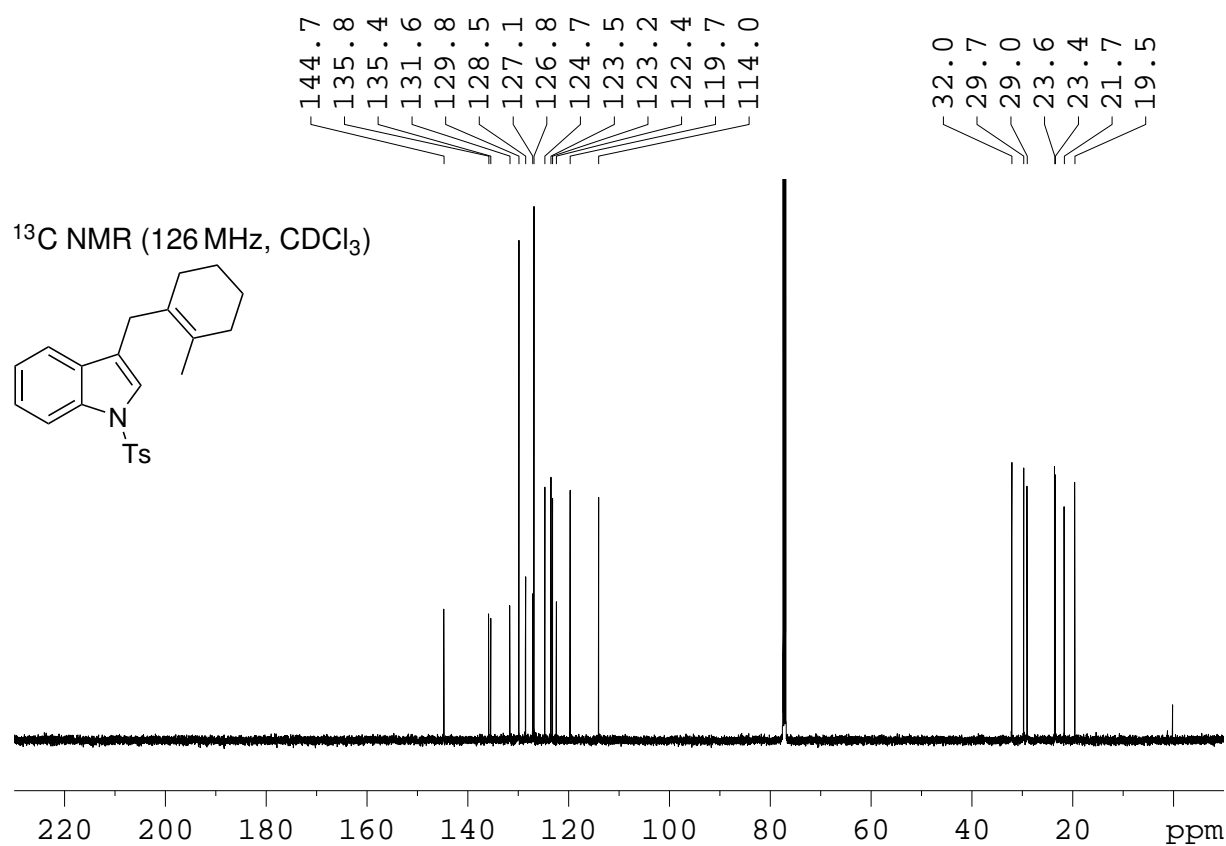

4 NMR spectra of new compounds

**Epoxide S4**

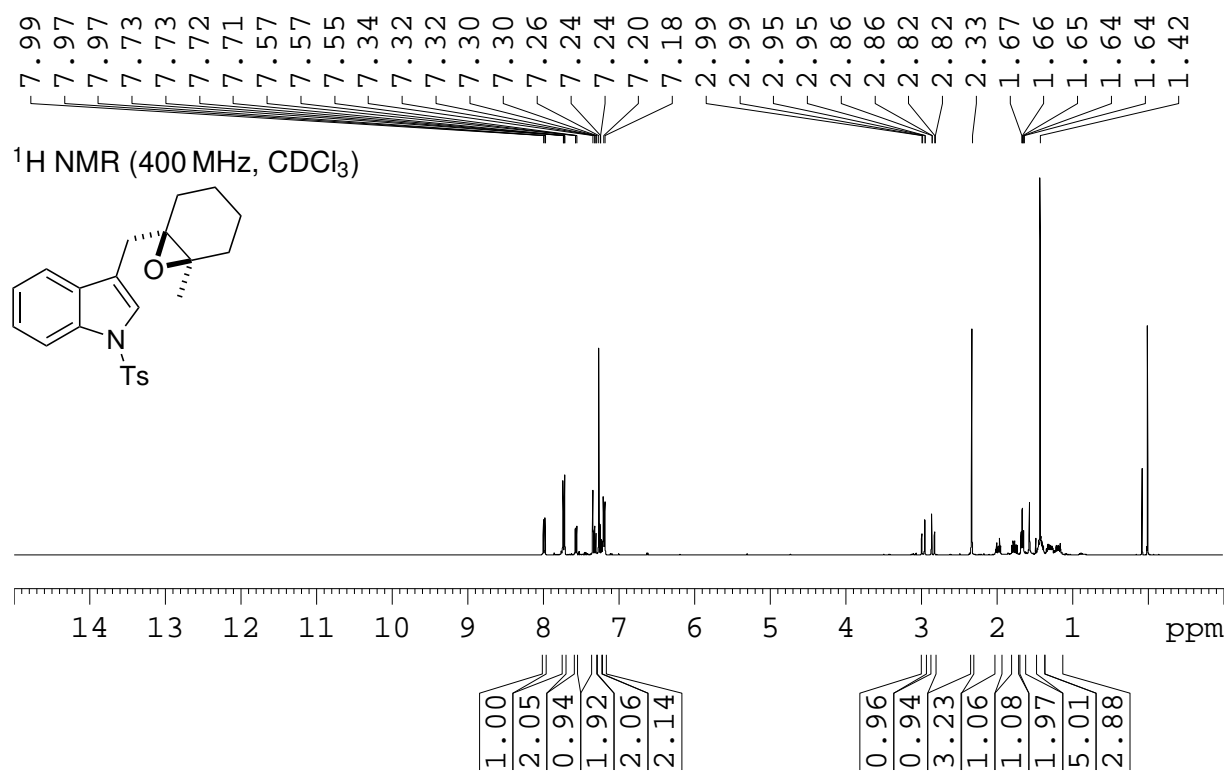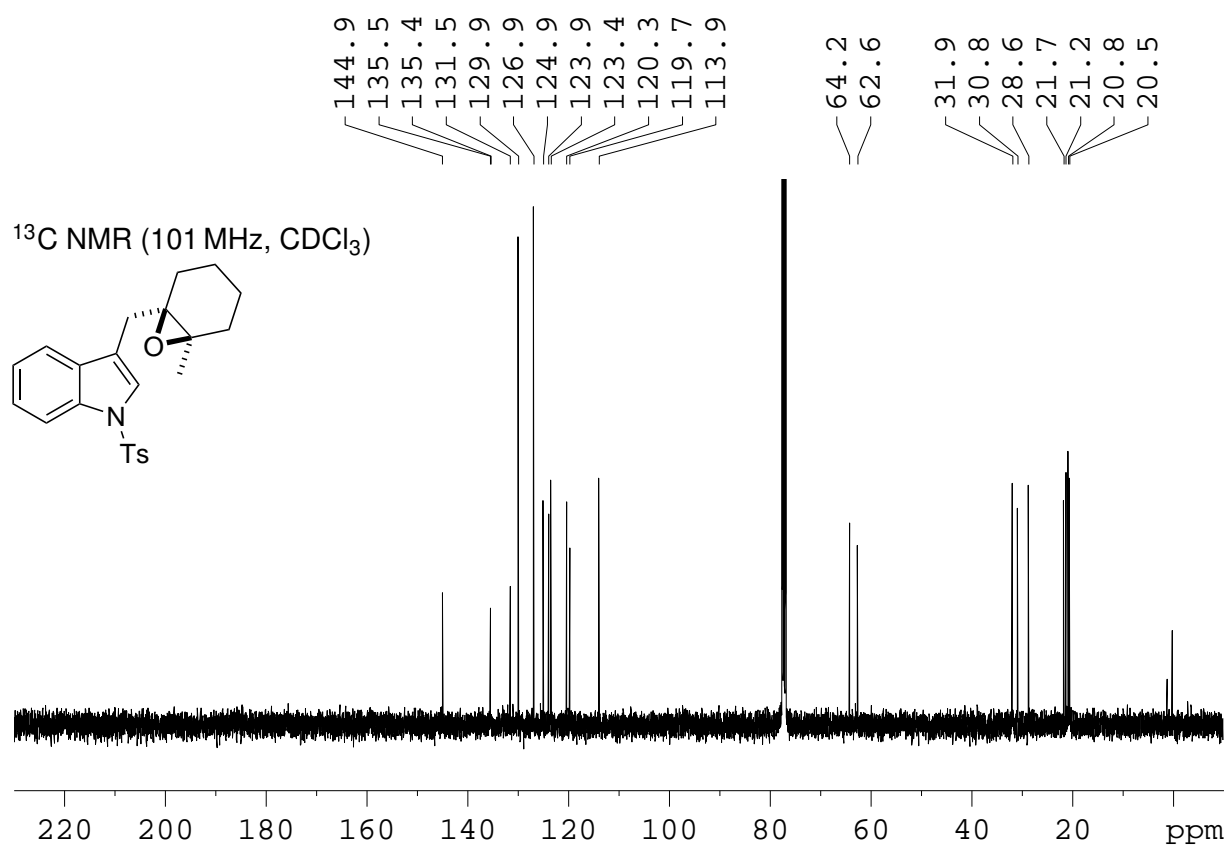

4 NMR spectra of new compounds

**1-(1-Methylcyclopentyl)-2-(1-tosyl-1*H*-indol-3-yl)ethan-1-one (S5)**

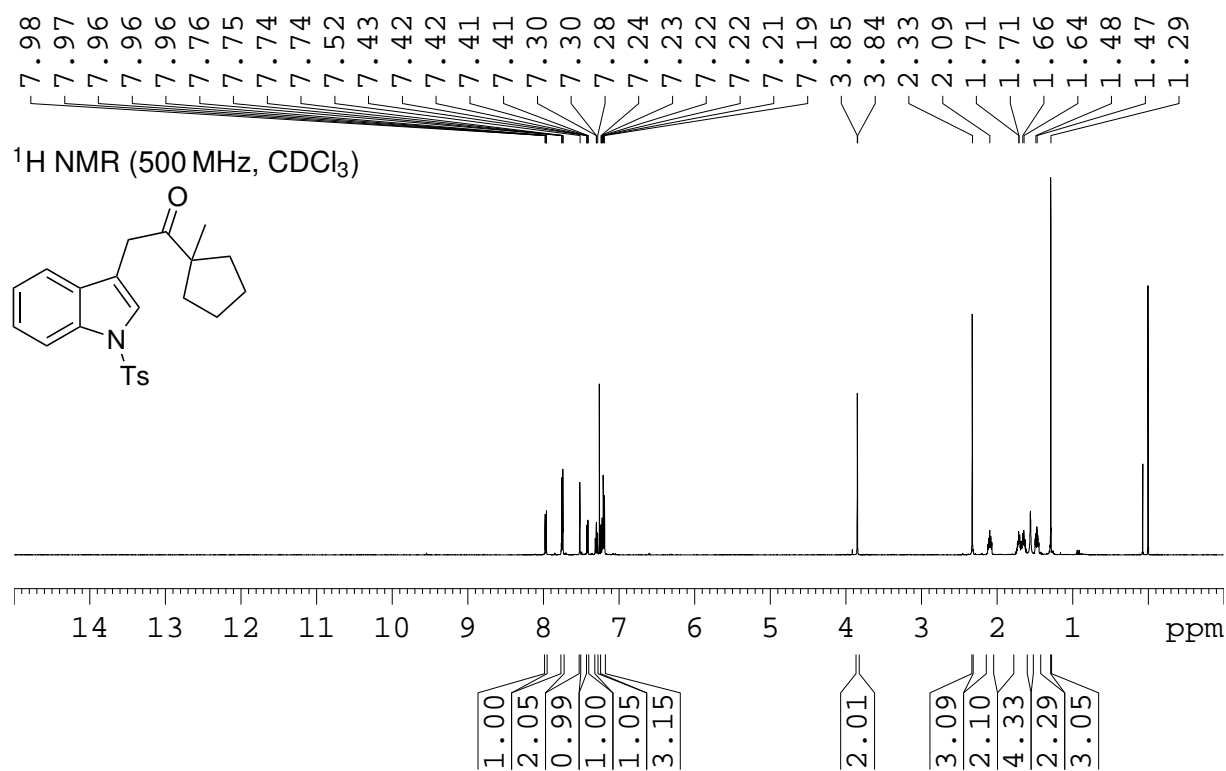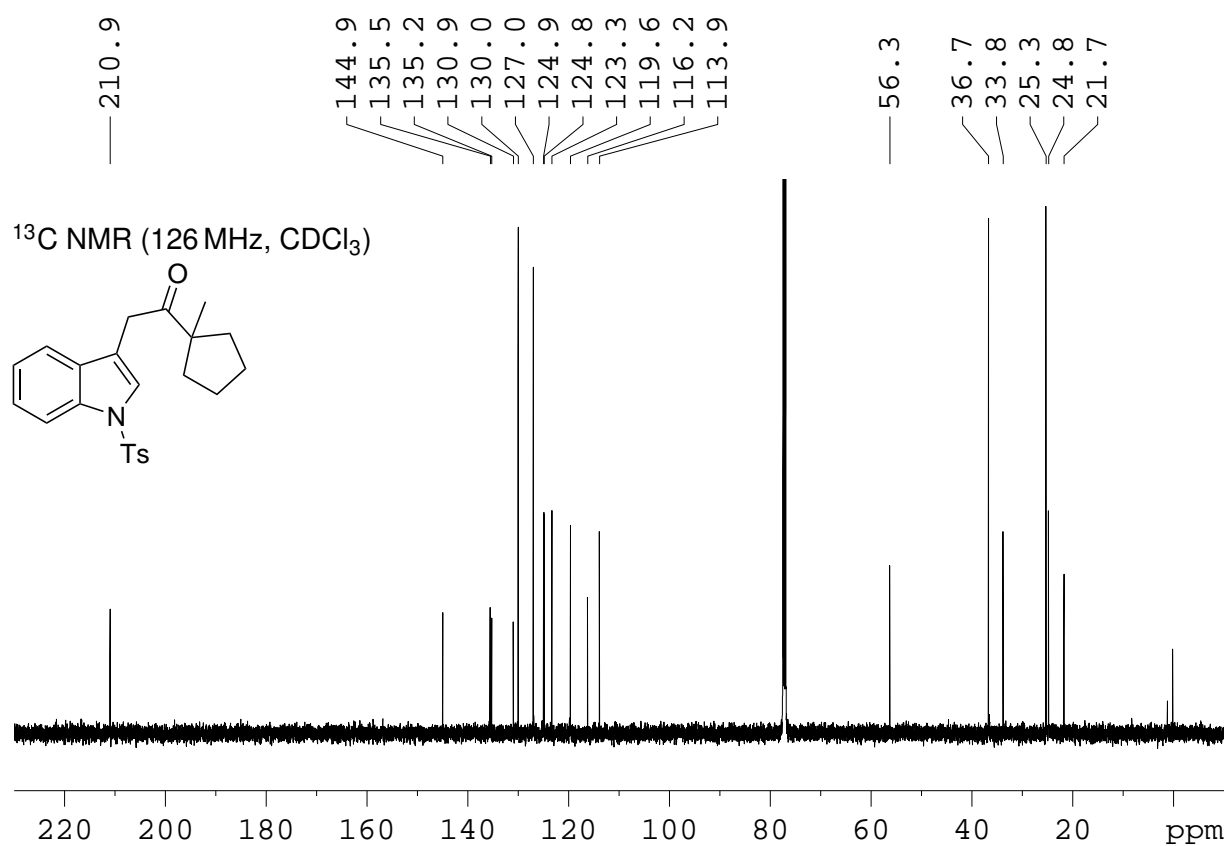

4 NMR spectra of new compounds

**(2-Methylcyclohex-1-en-1-yl)(1-tosyl-1H-indol-3-yl)methyl acetate (S9)**

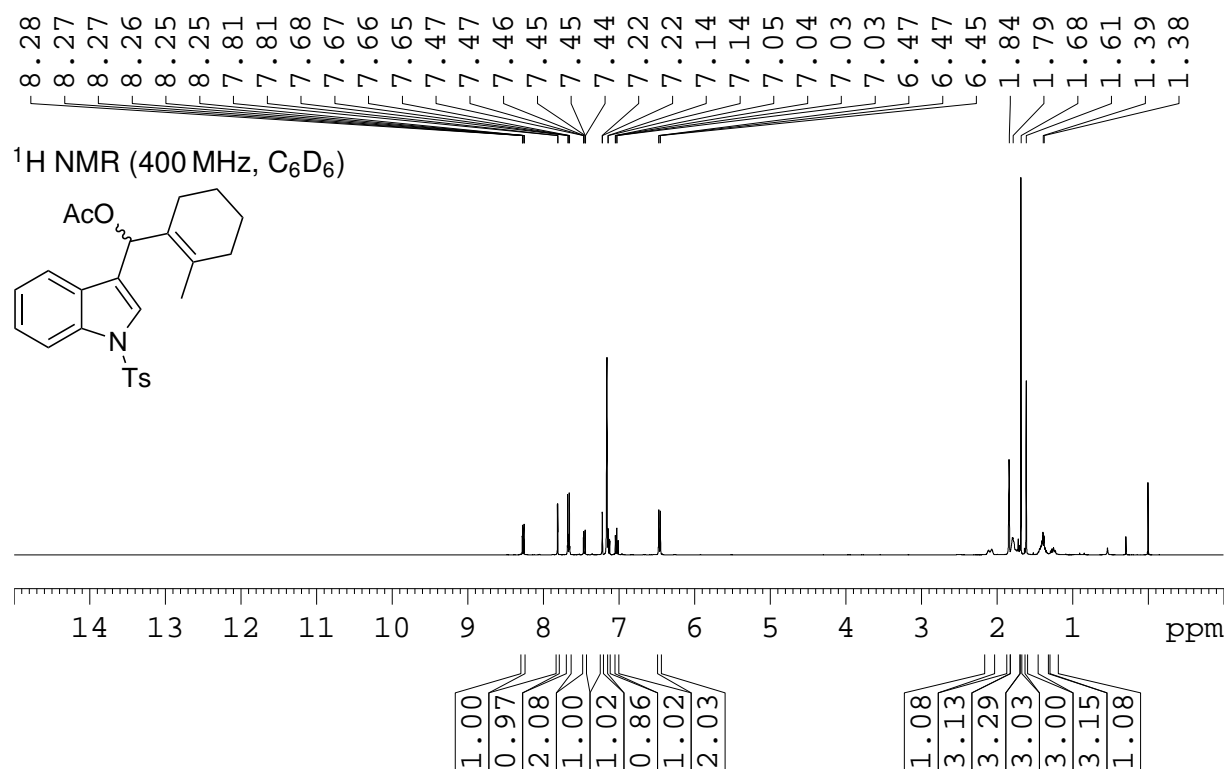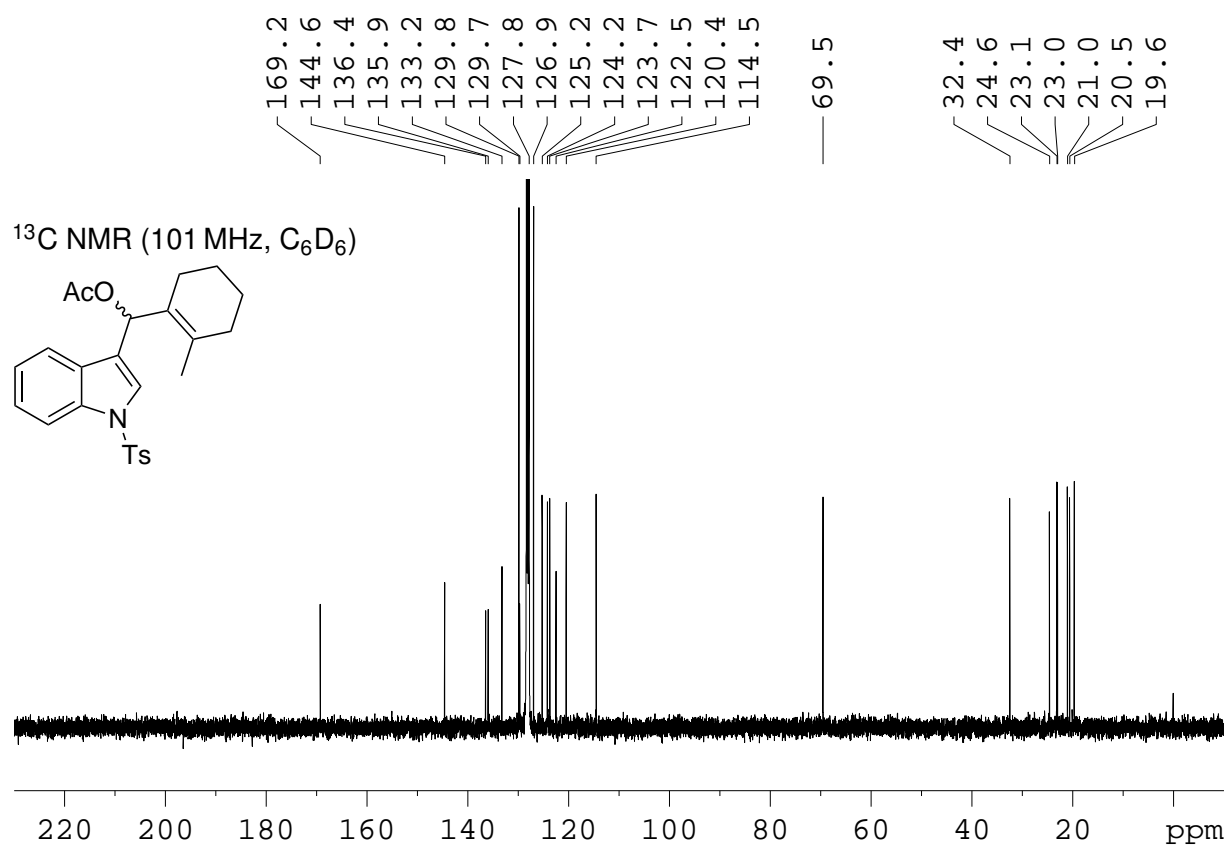

4 NMR spectra of new compounds

**(E)-3-((2-Methylcyclohex-2-en-1-ylidene)methyl)-1-tosyl-1H-indole (S10)**

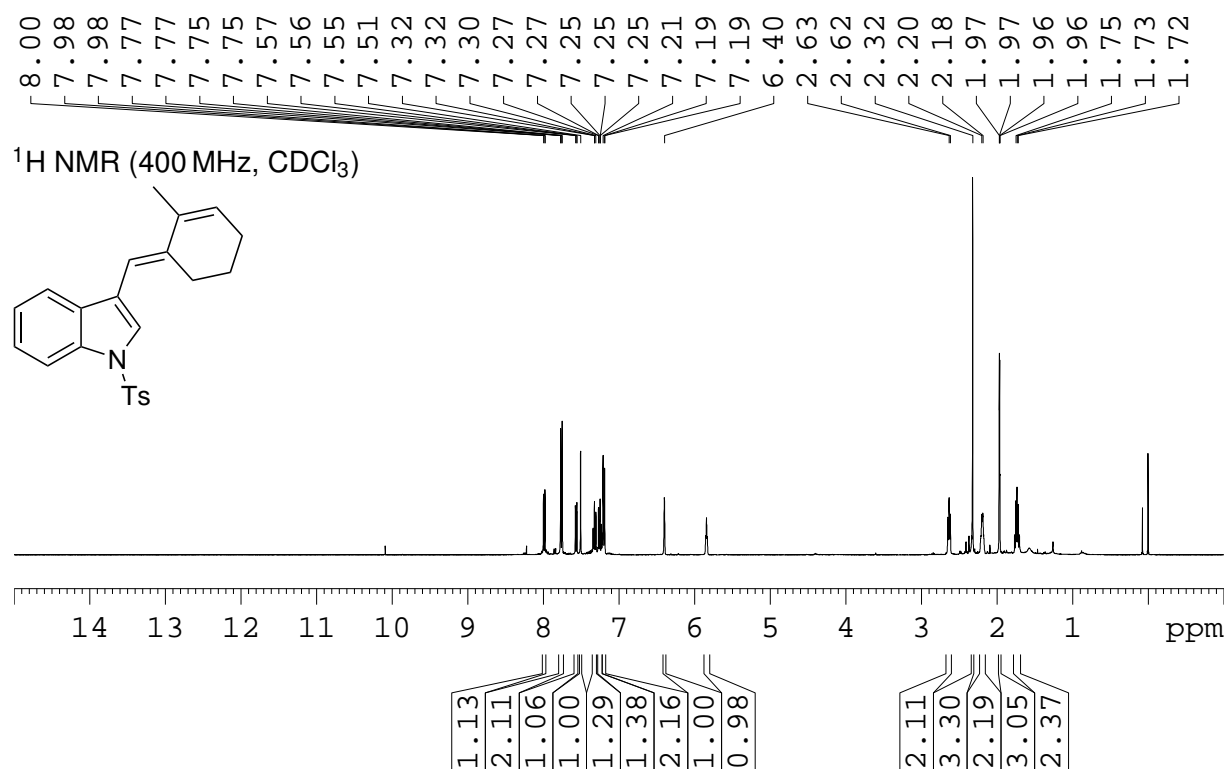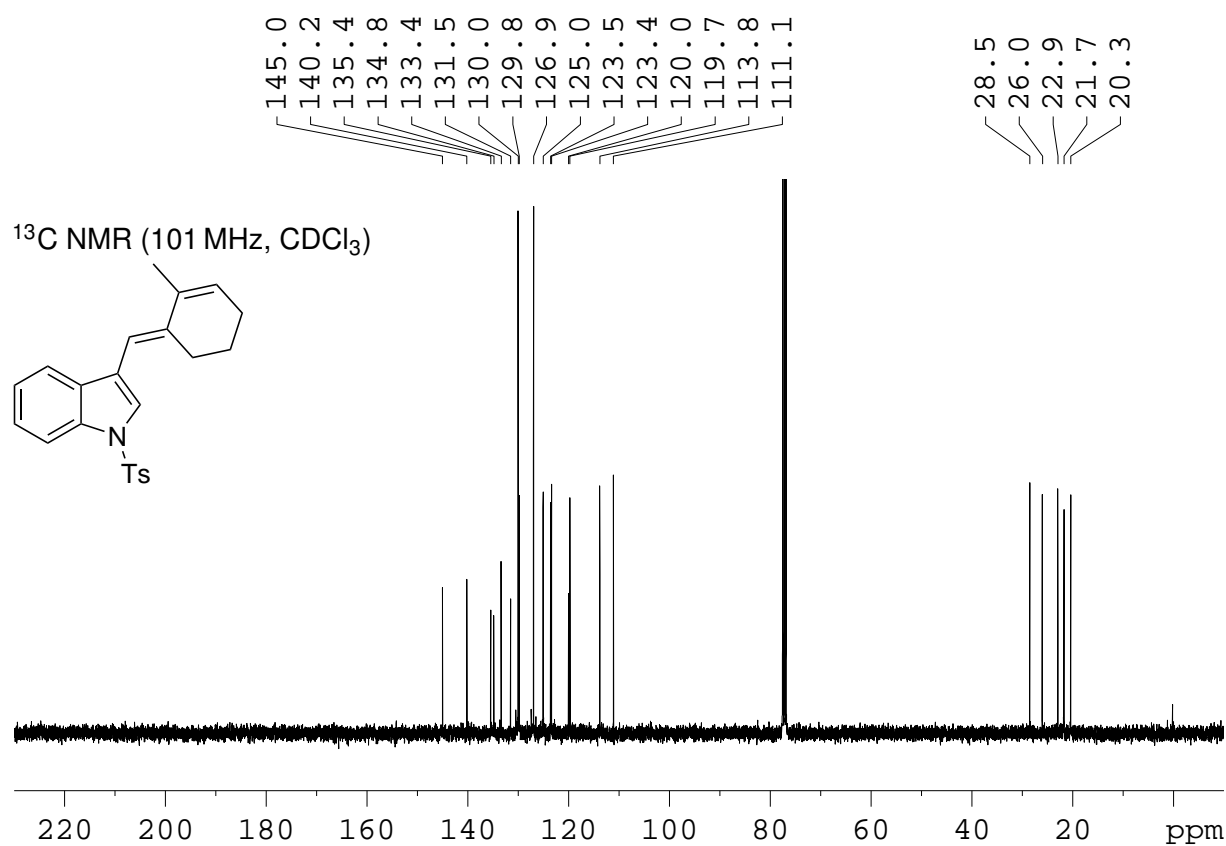

4 NMR spectra of new compounds

***cis*-Hydrindanone 8**

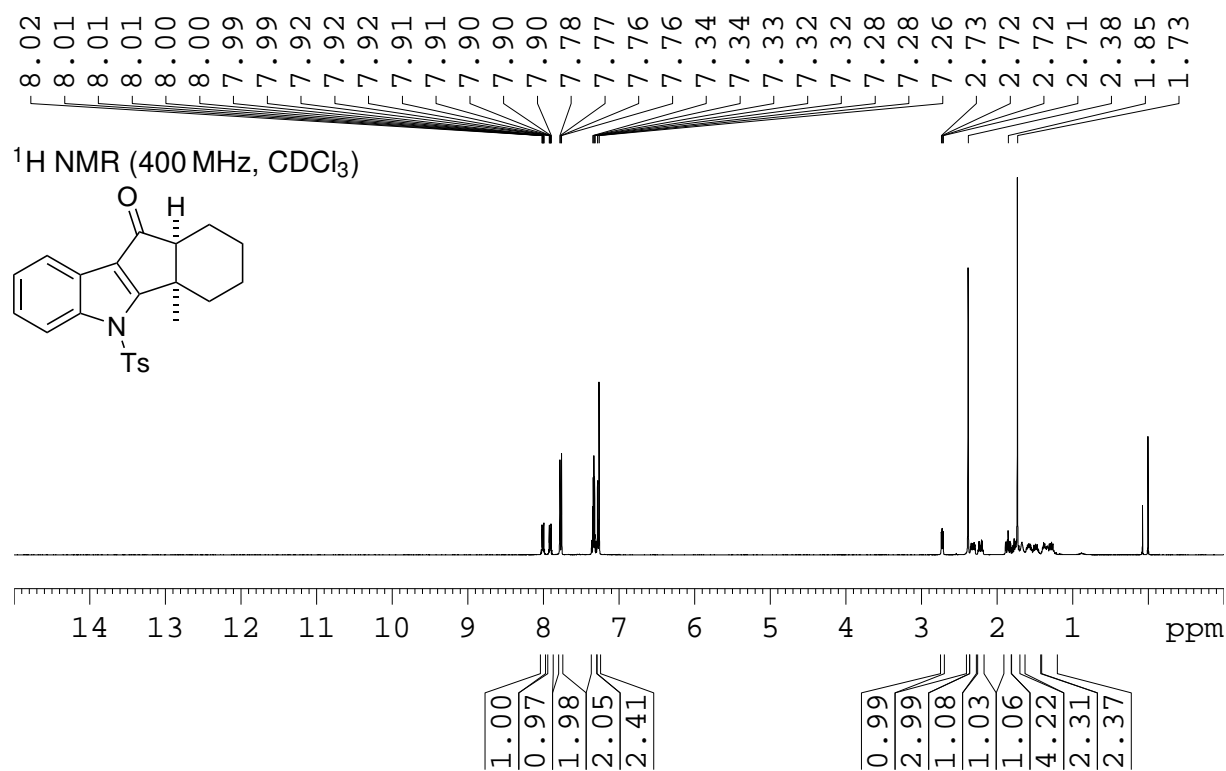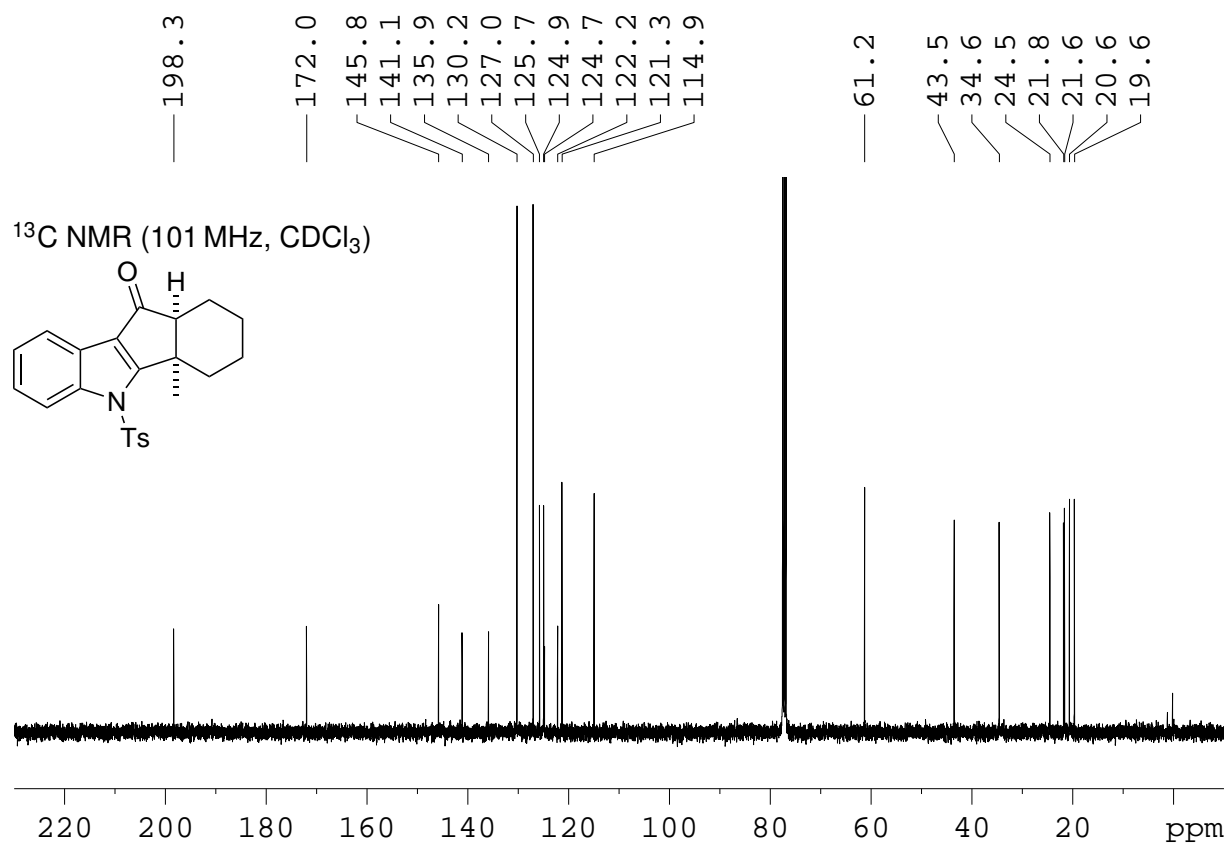

# 4 NMR spectra of new compounds

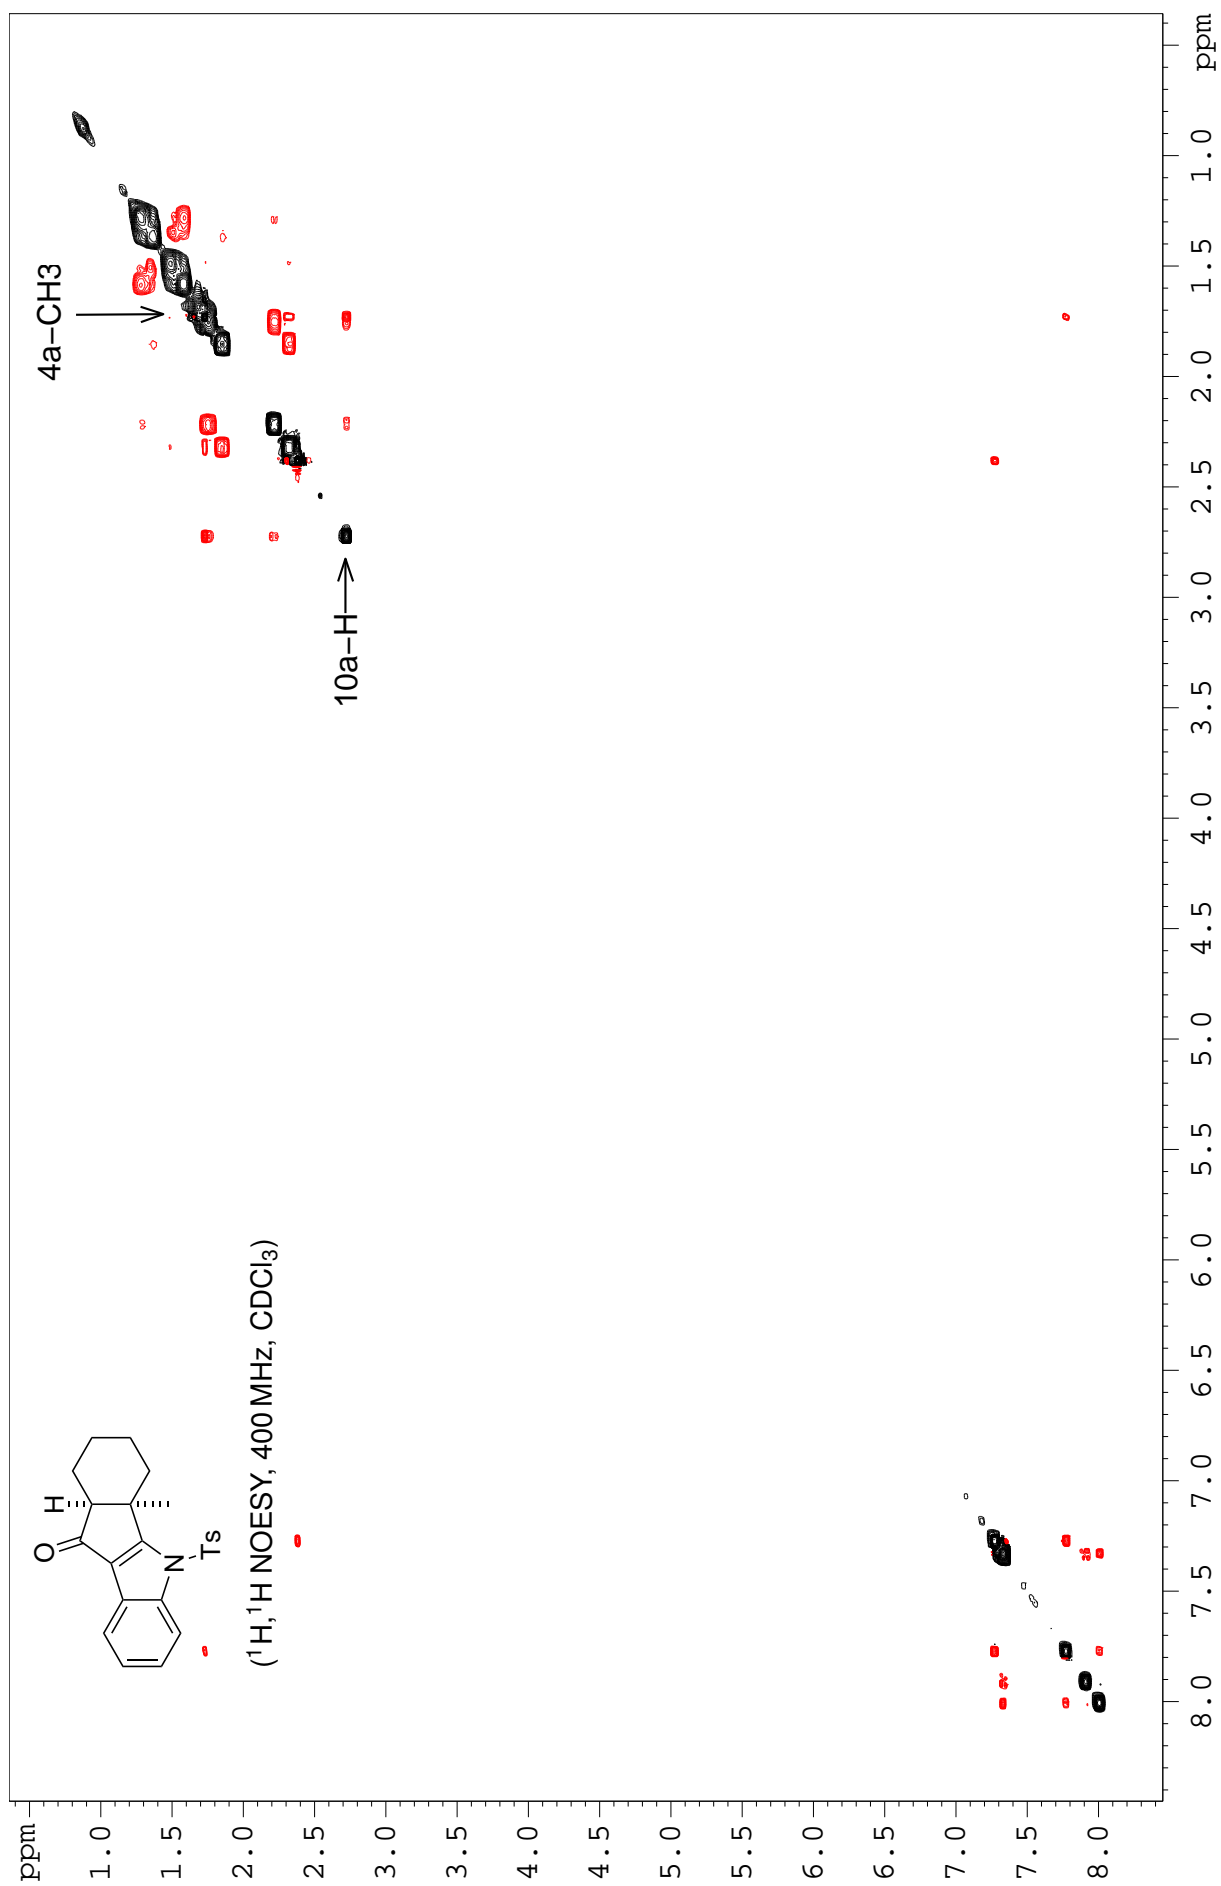

4 NMR spectra of new compounds

**4a-Methyl-5-tosyl-1,2,3,4,4a,5-hexahydroindeno[1,2-b]indole (9)**

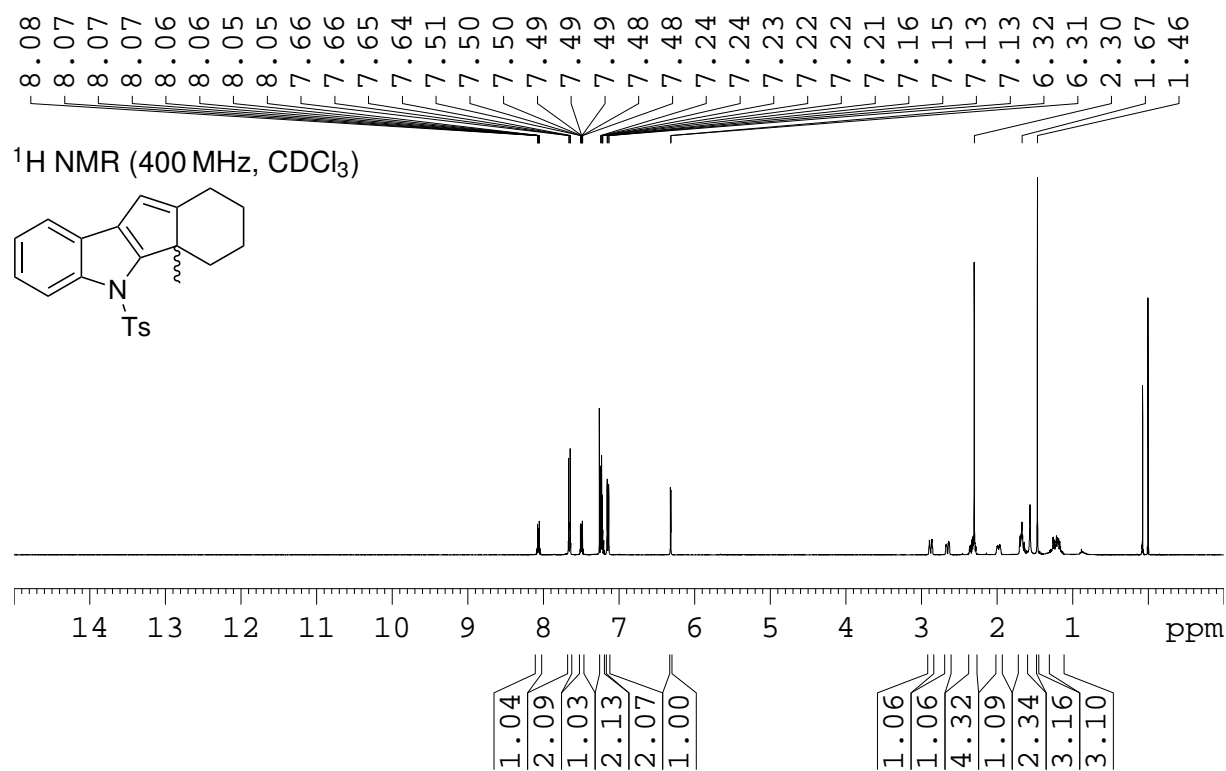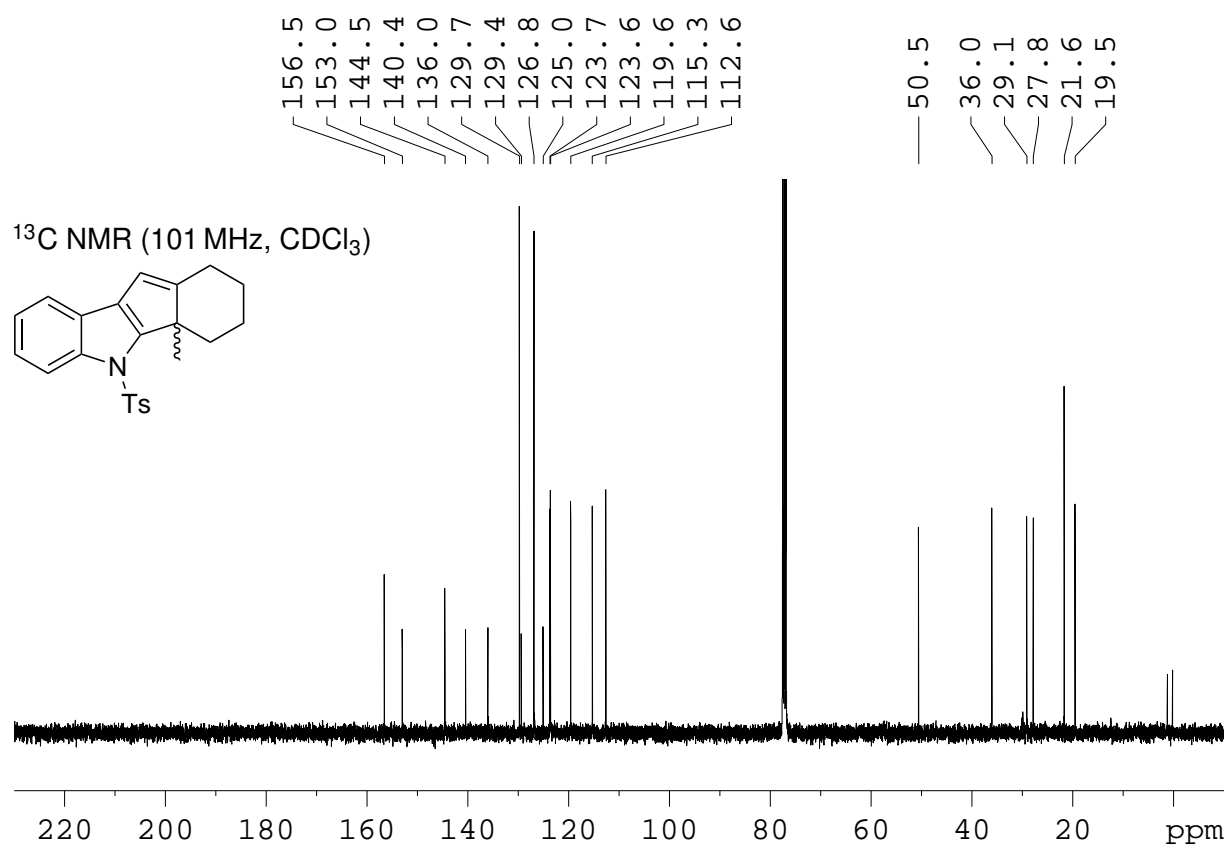



4 NMR spectra of new compounds

**Diol 14**

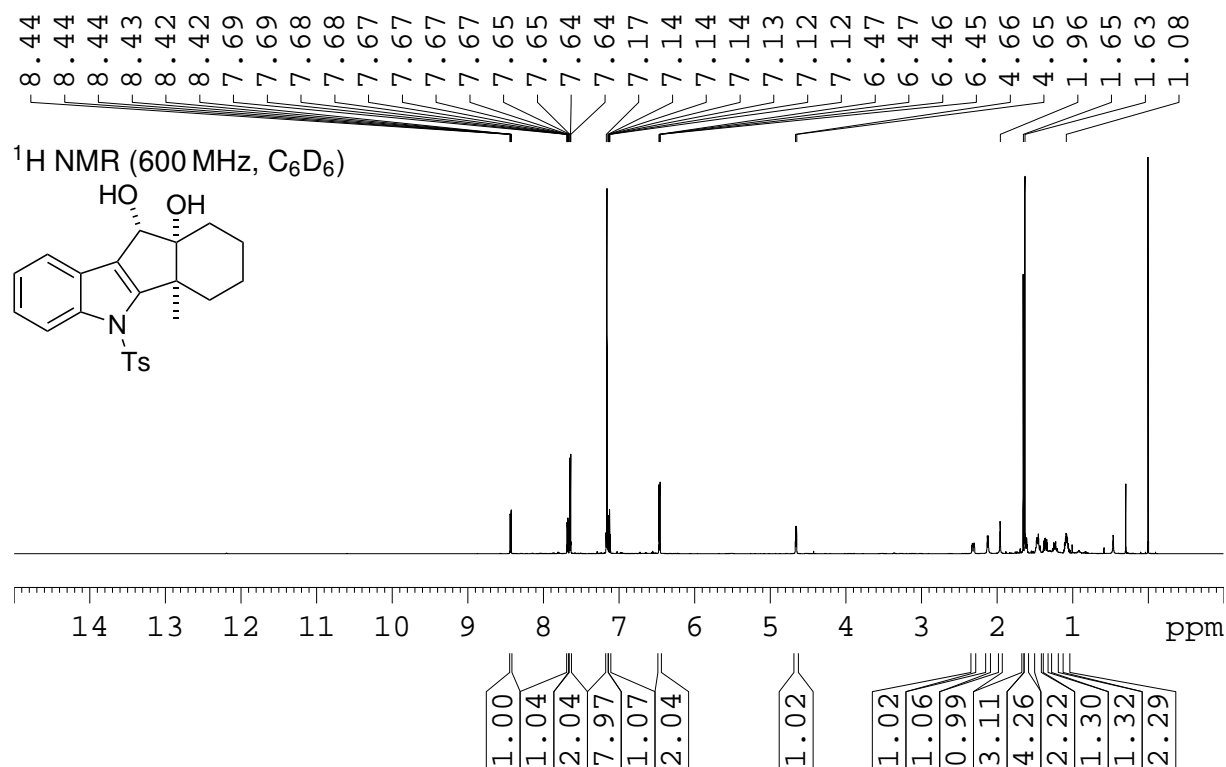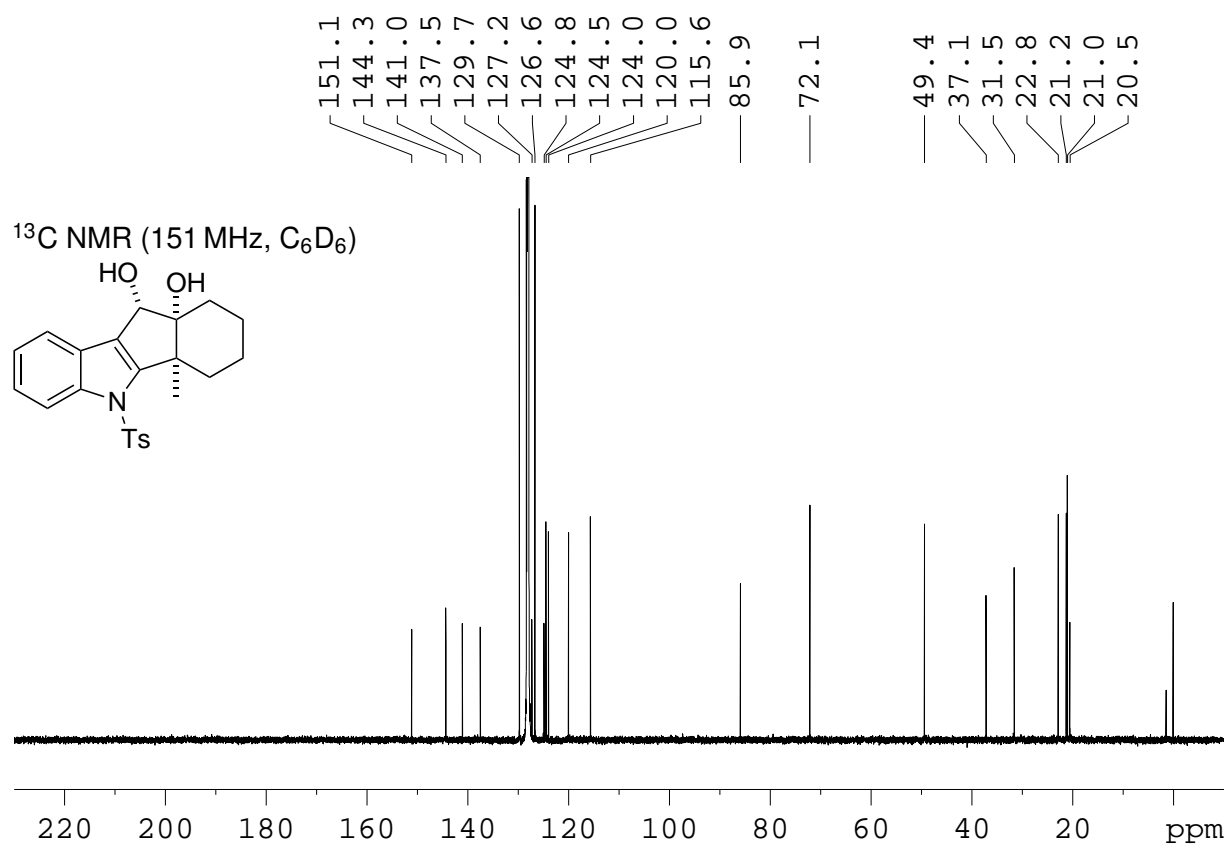

# 4 NMR spectra of new compounds

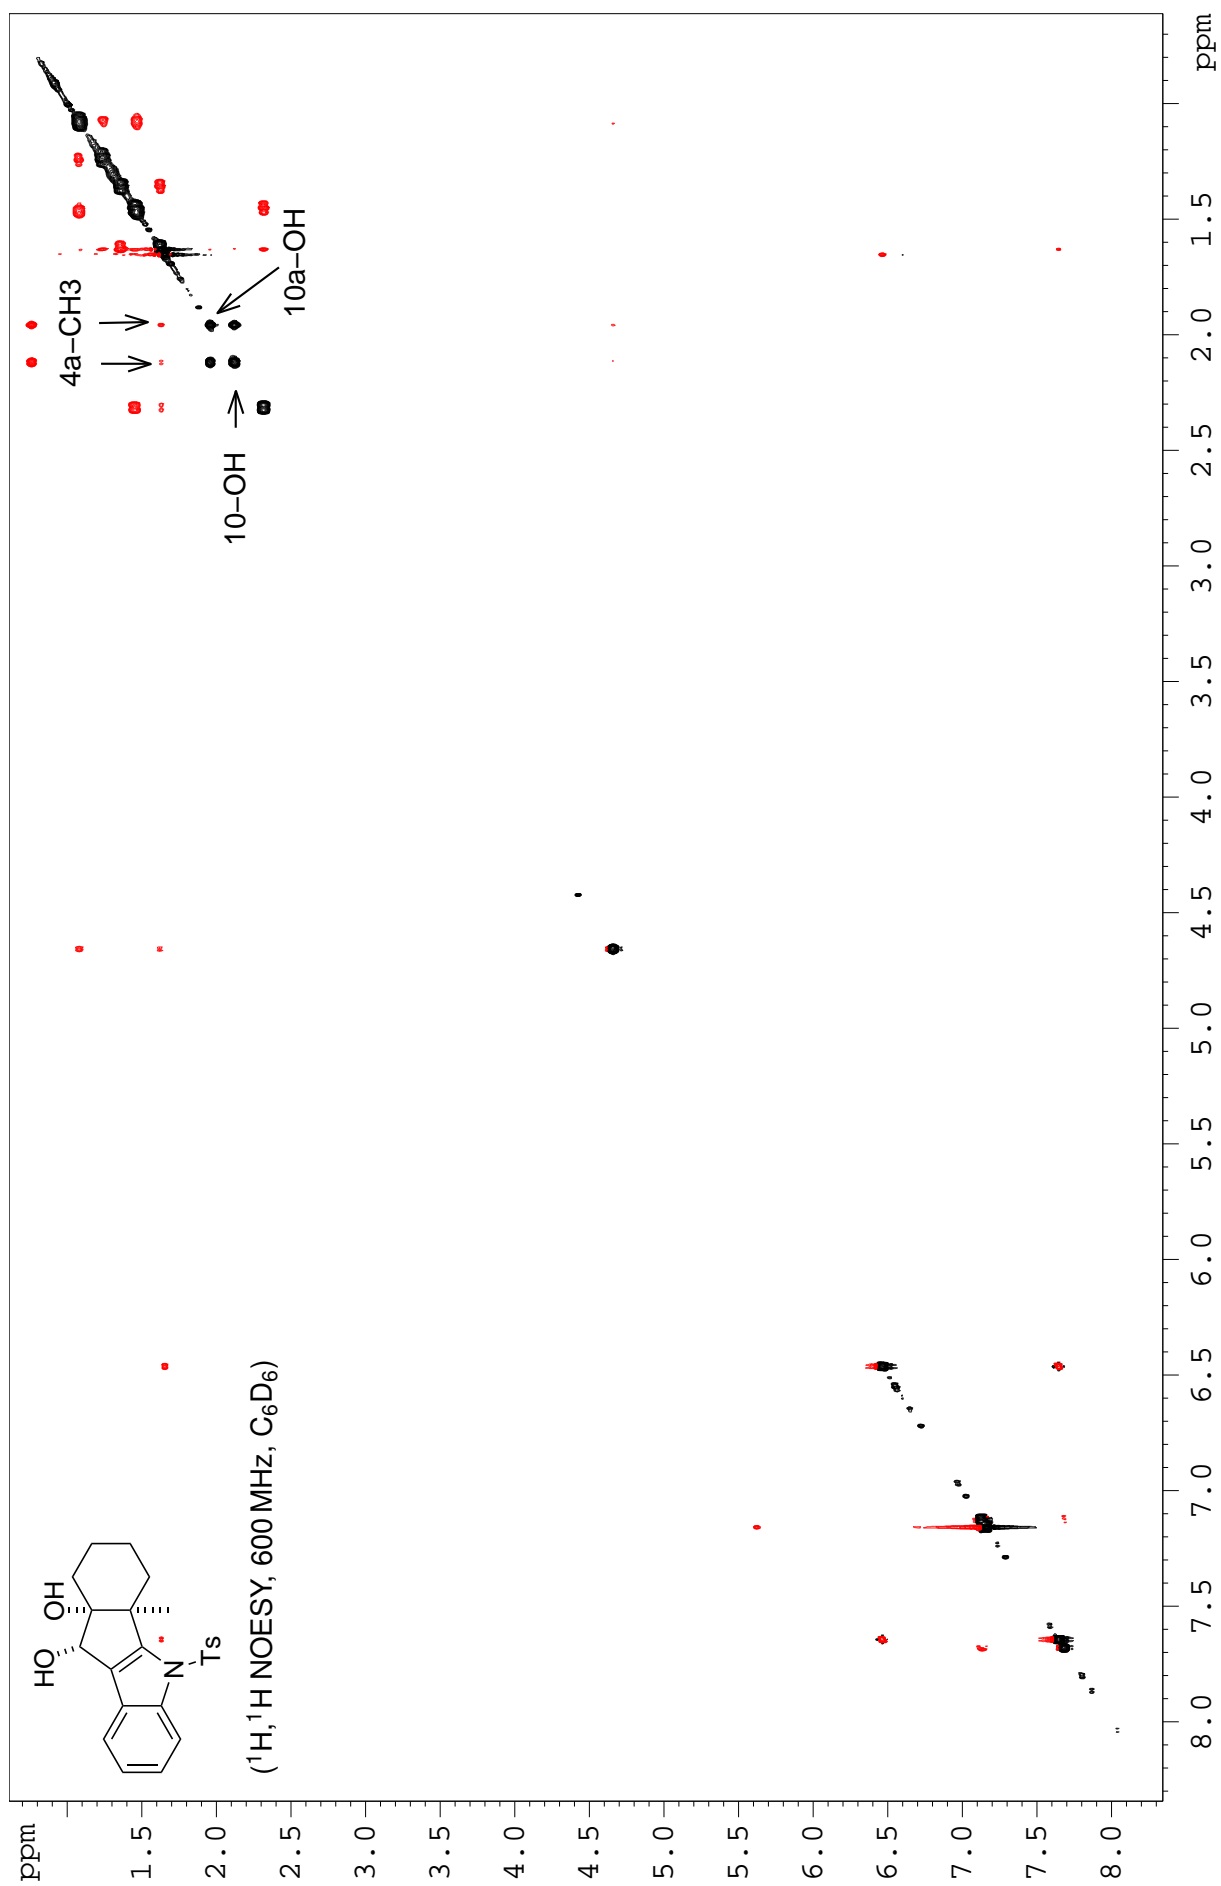

4 NMR spectra of new compounds

**Bromohydrin 10**

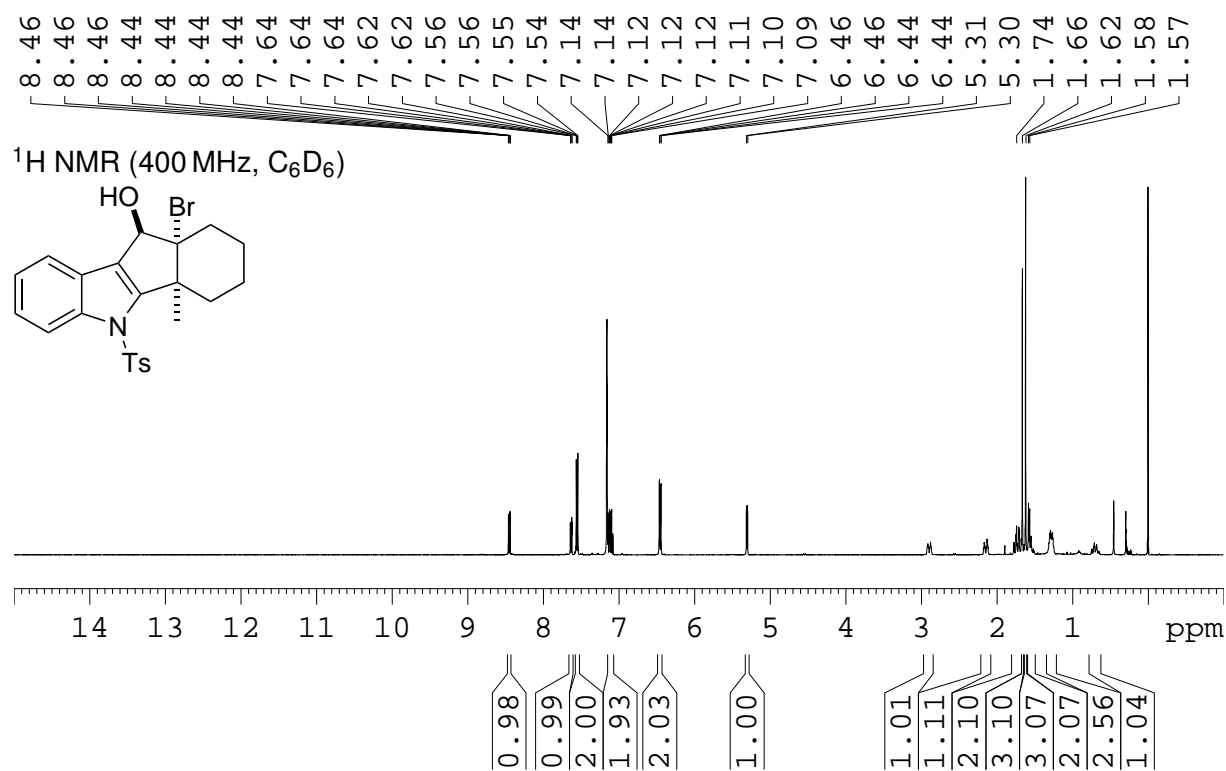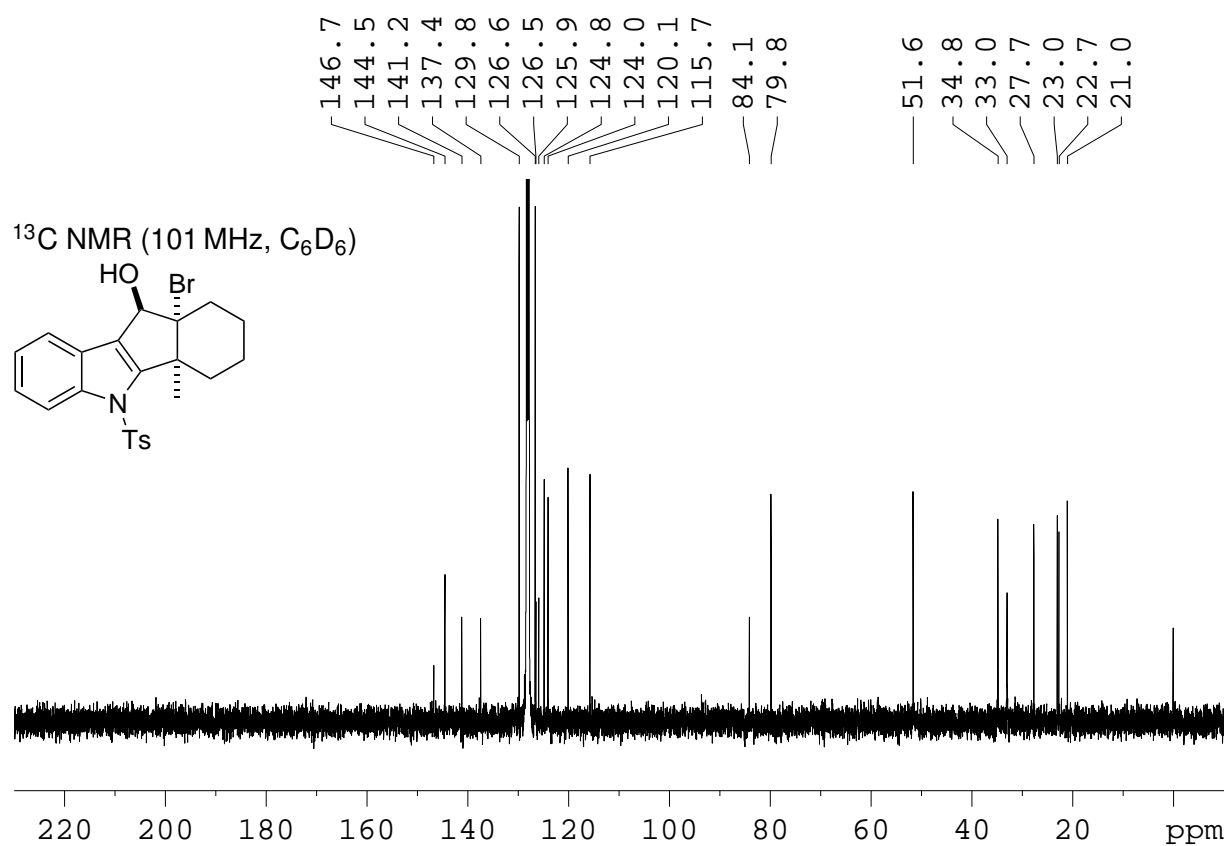

4 NMR spectra of new compounds

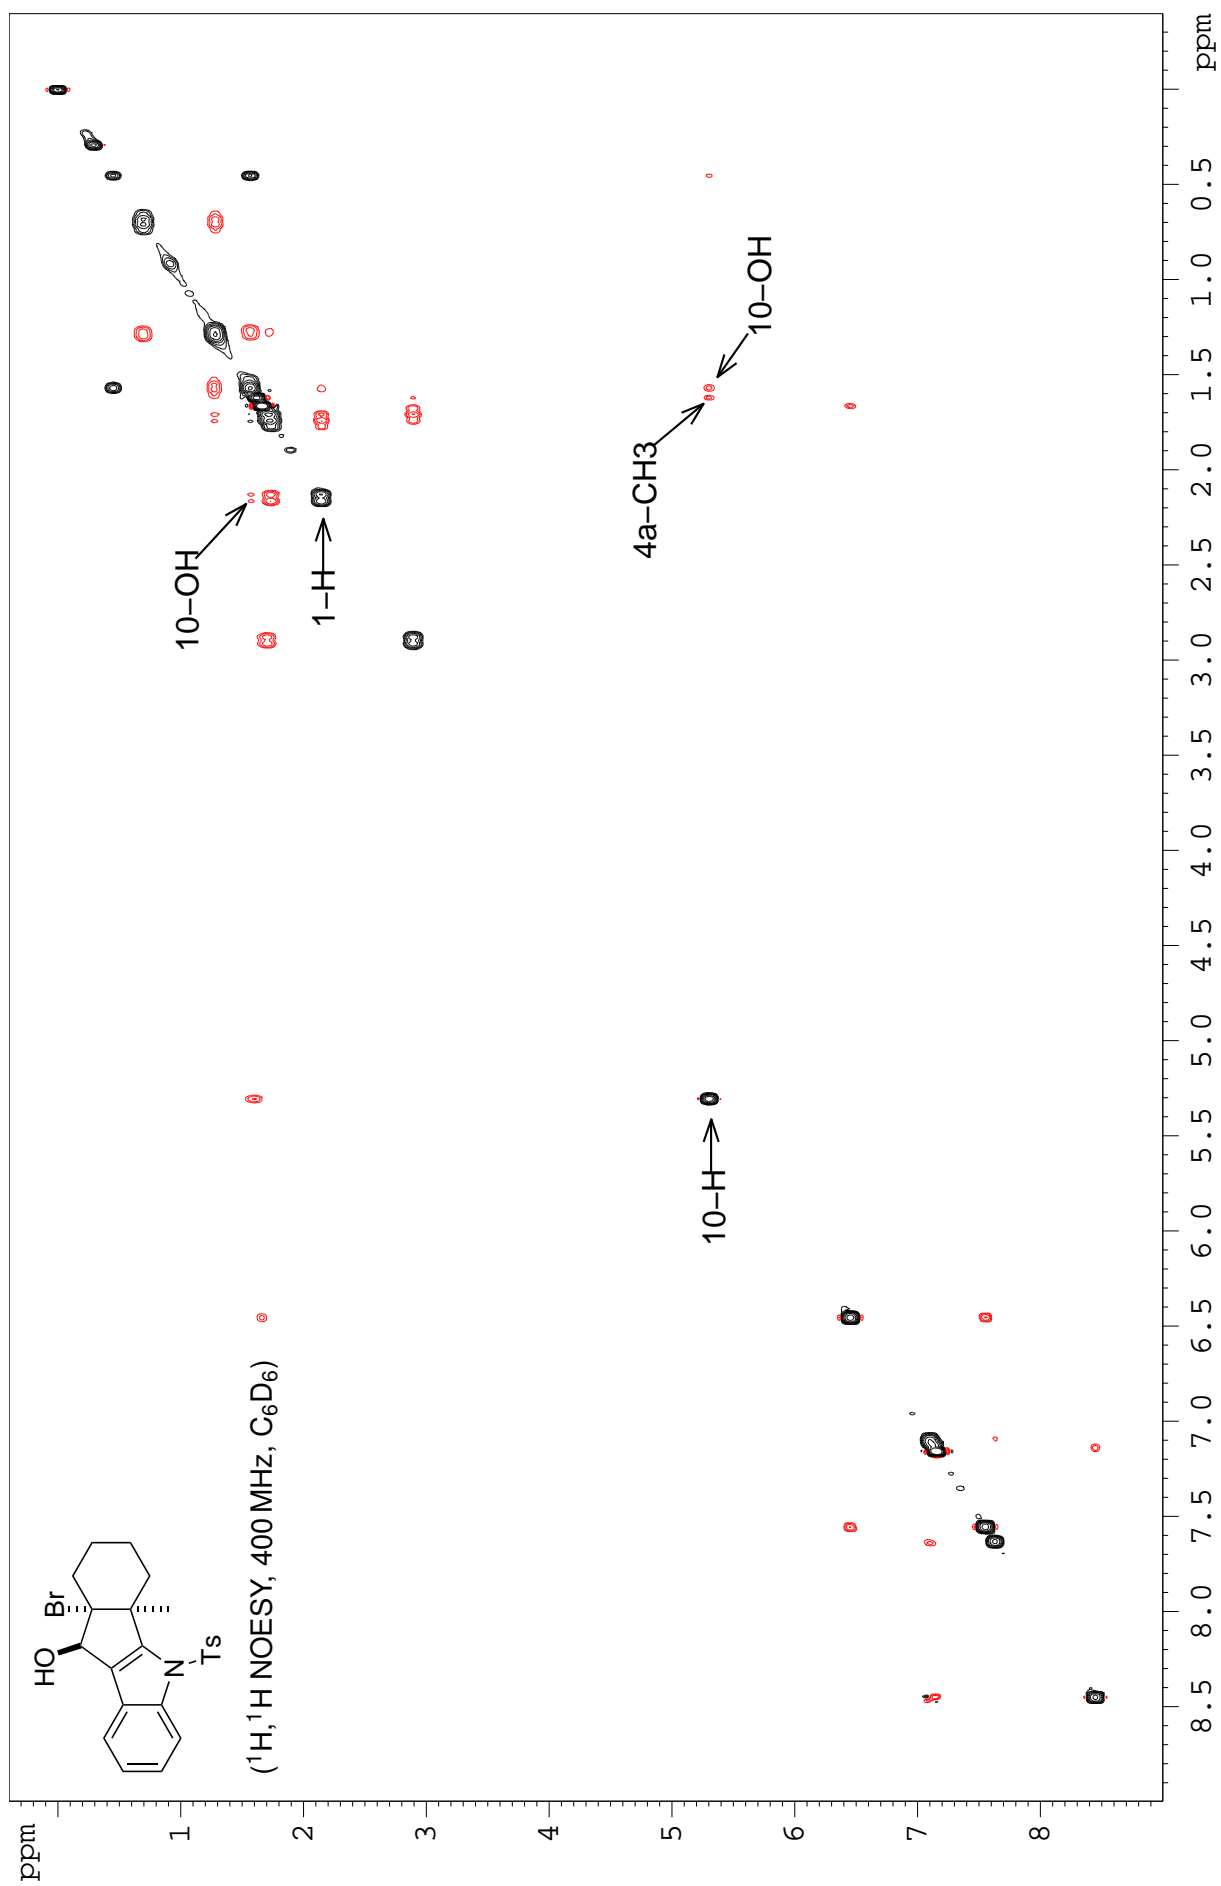

4 NMR spectra of new compounds

**Cyclobutane 11**

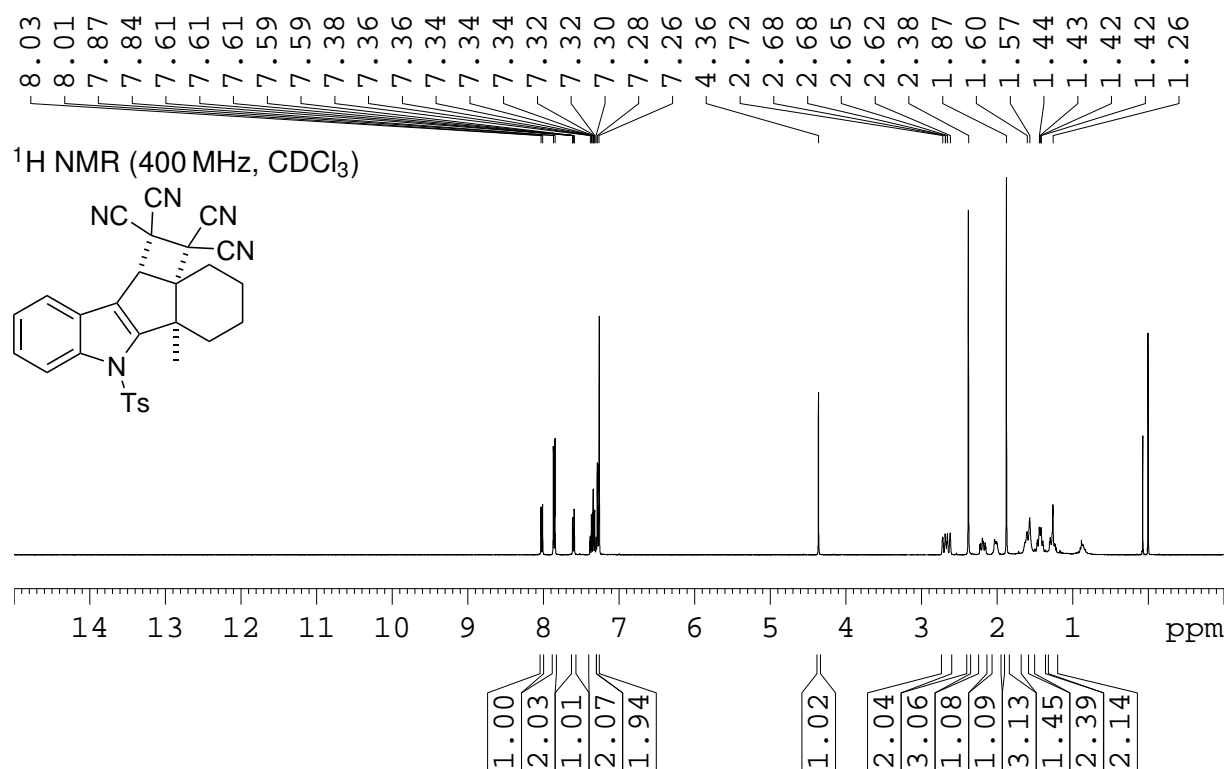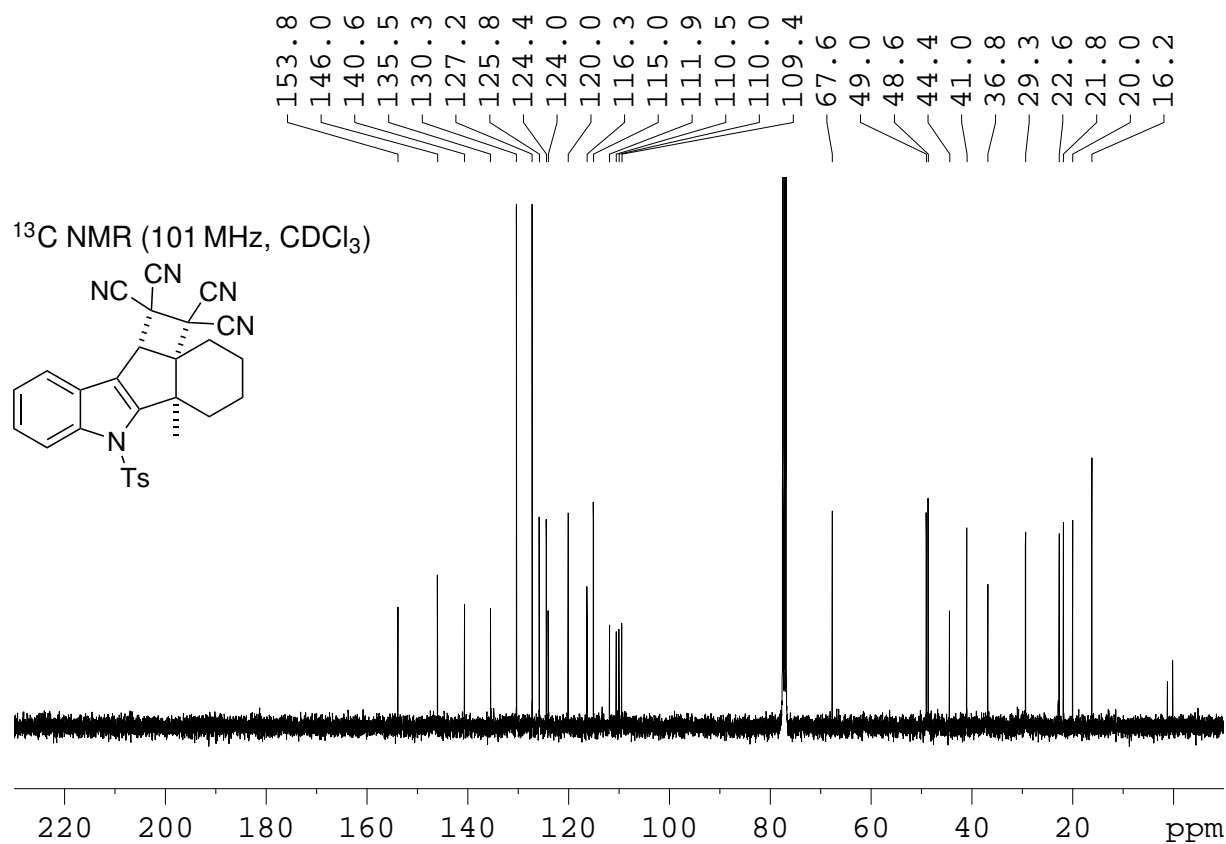

4 NMR spectra of new compounds

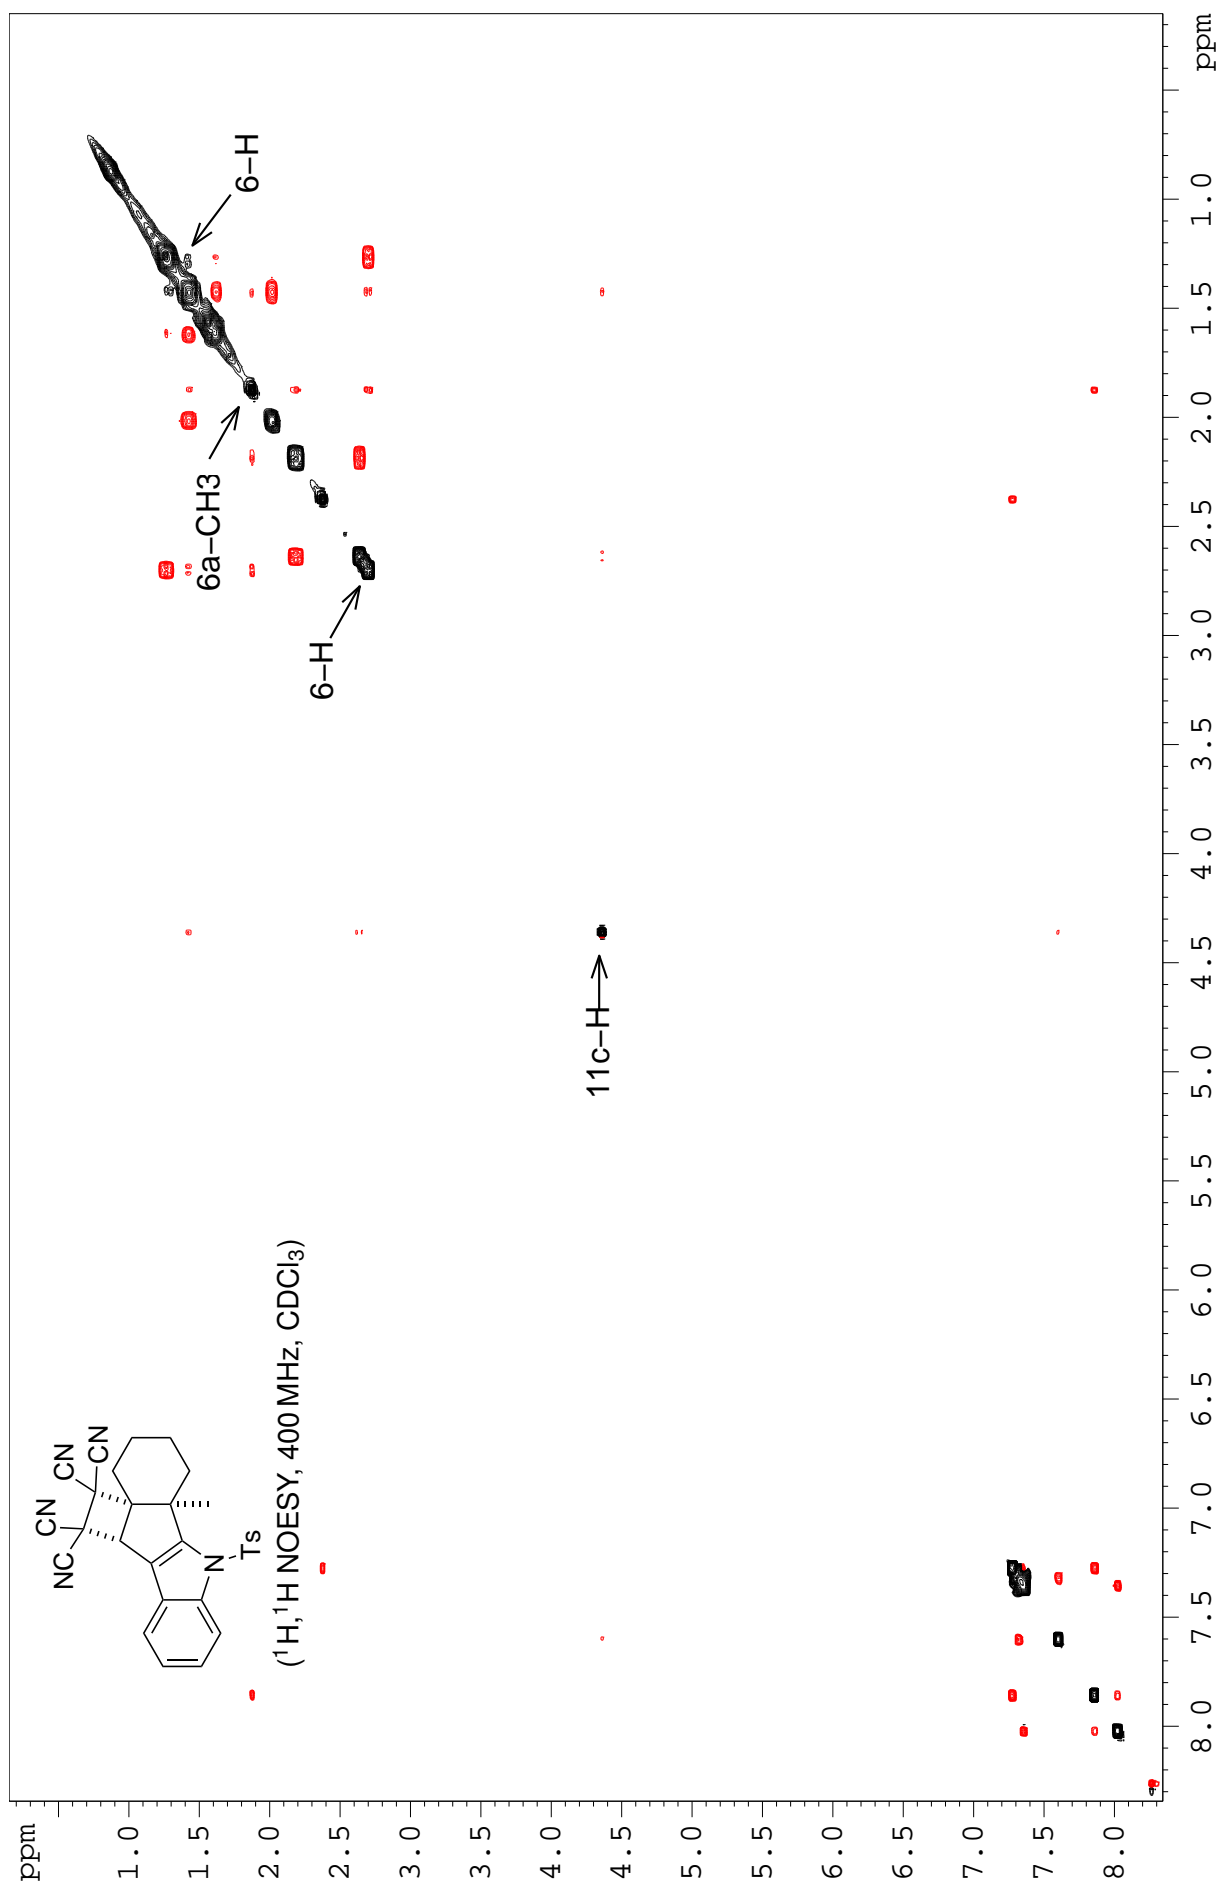

4 NMR spectra of new compounds

**Sulfite 16**

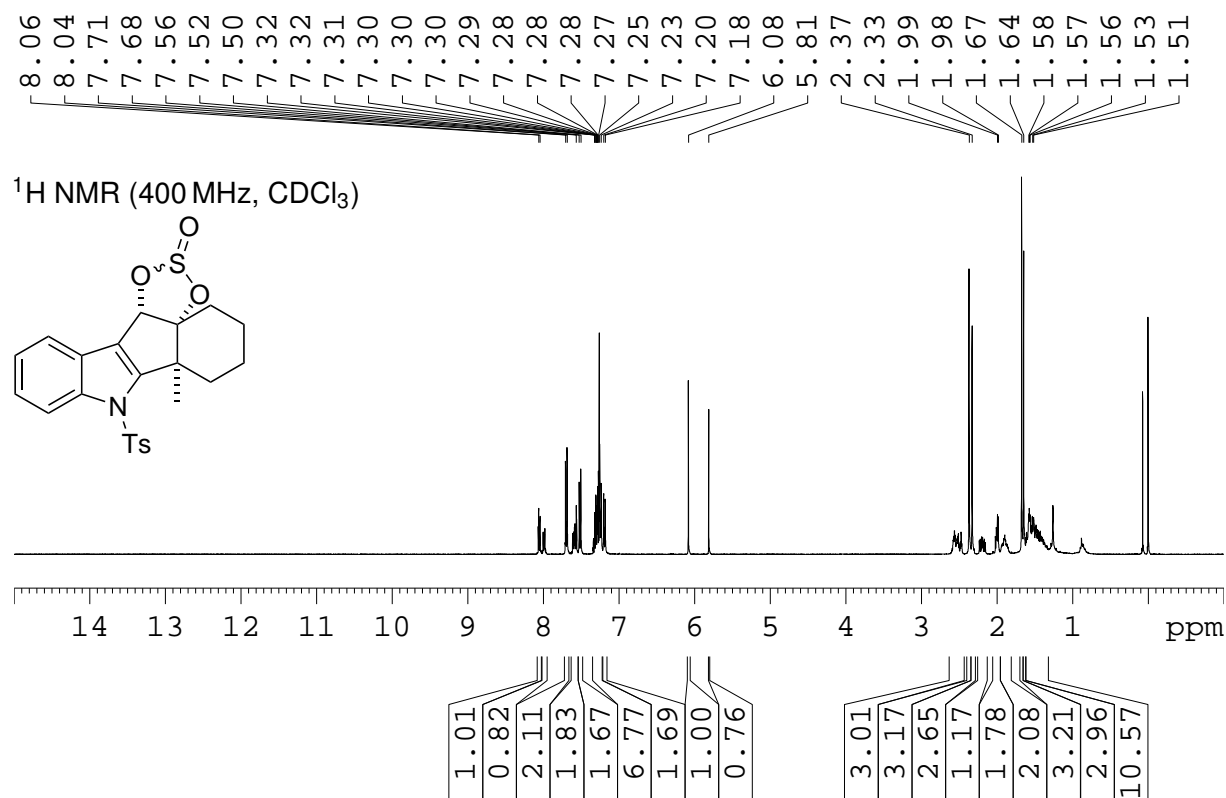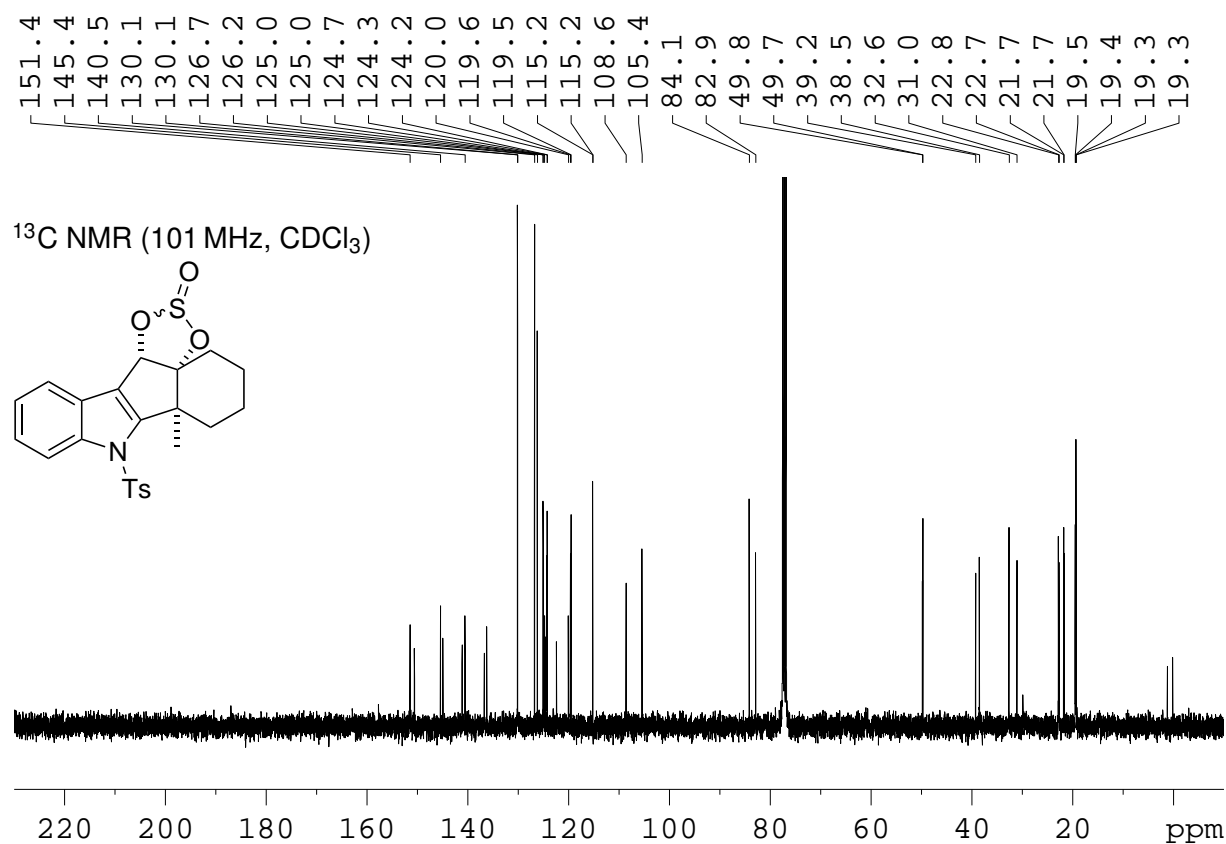

4 NMR spectra of new compounds

**Ketone 17**

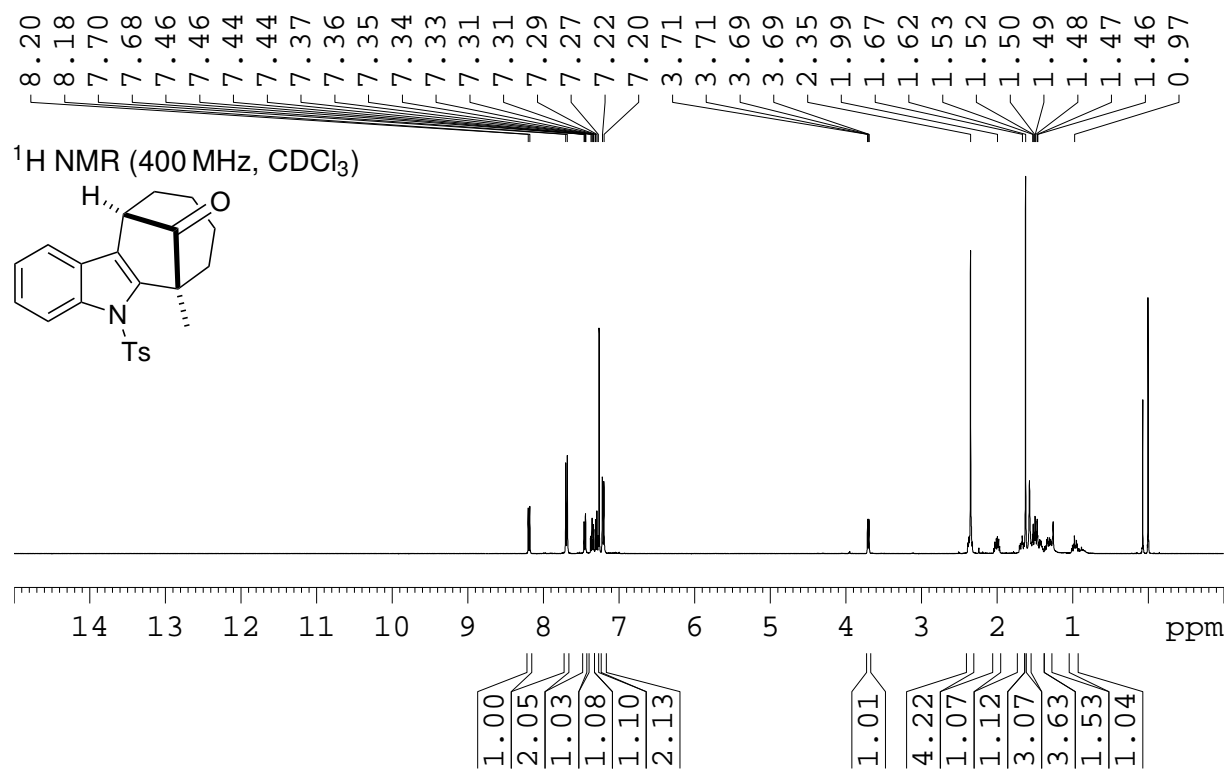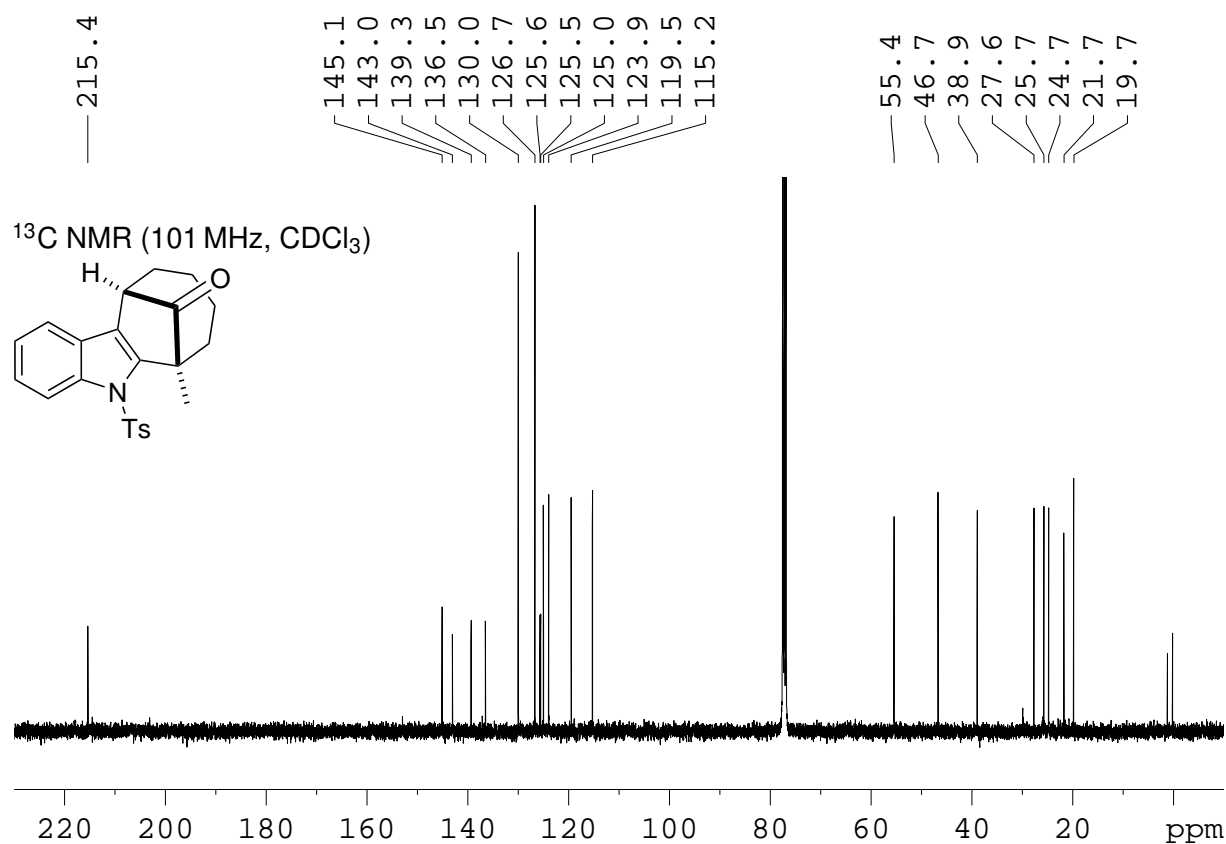



4 NMR spectra of new compounds

**Diol 18**

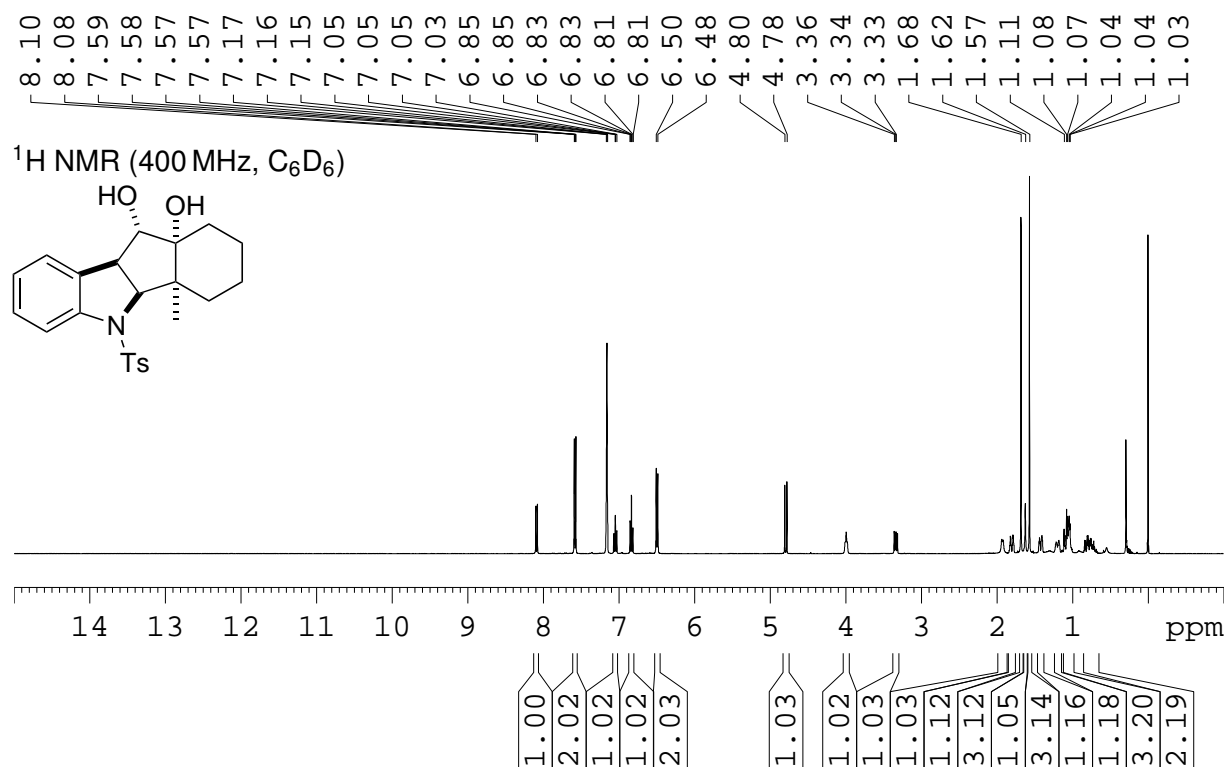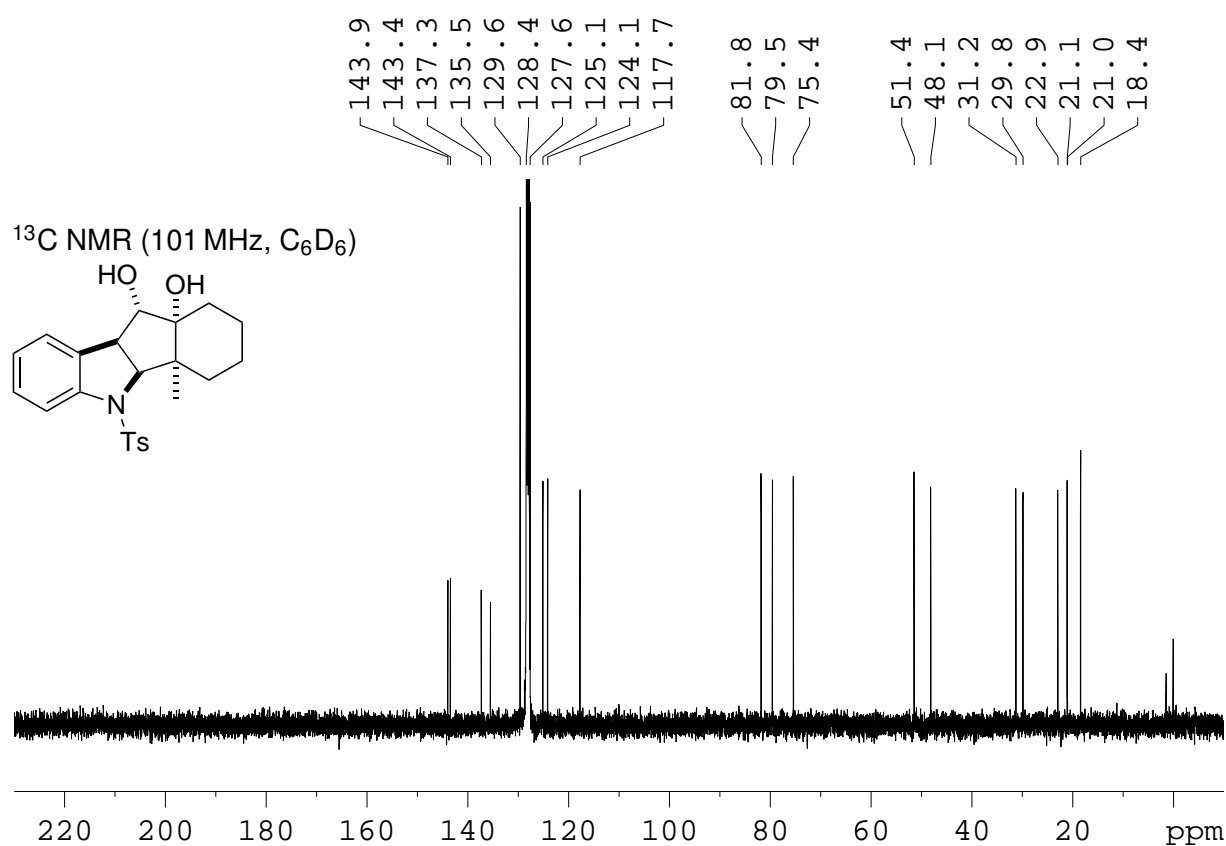

4 NMR spectra of new compounds

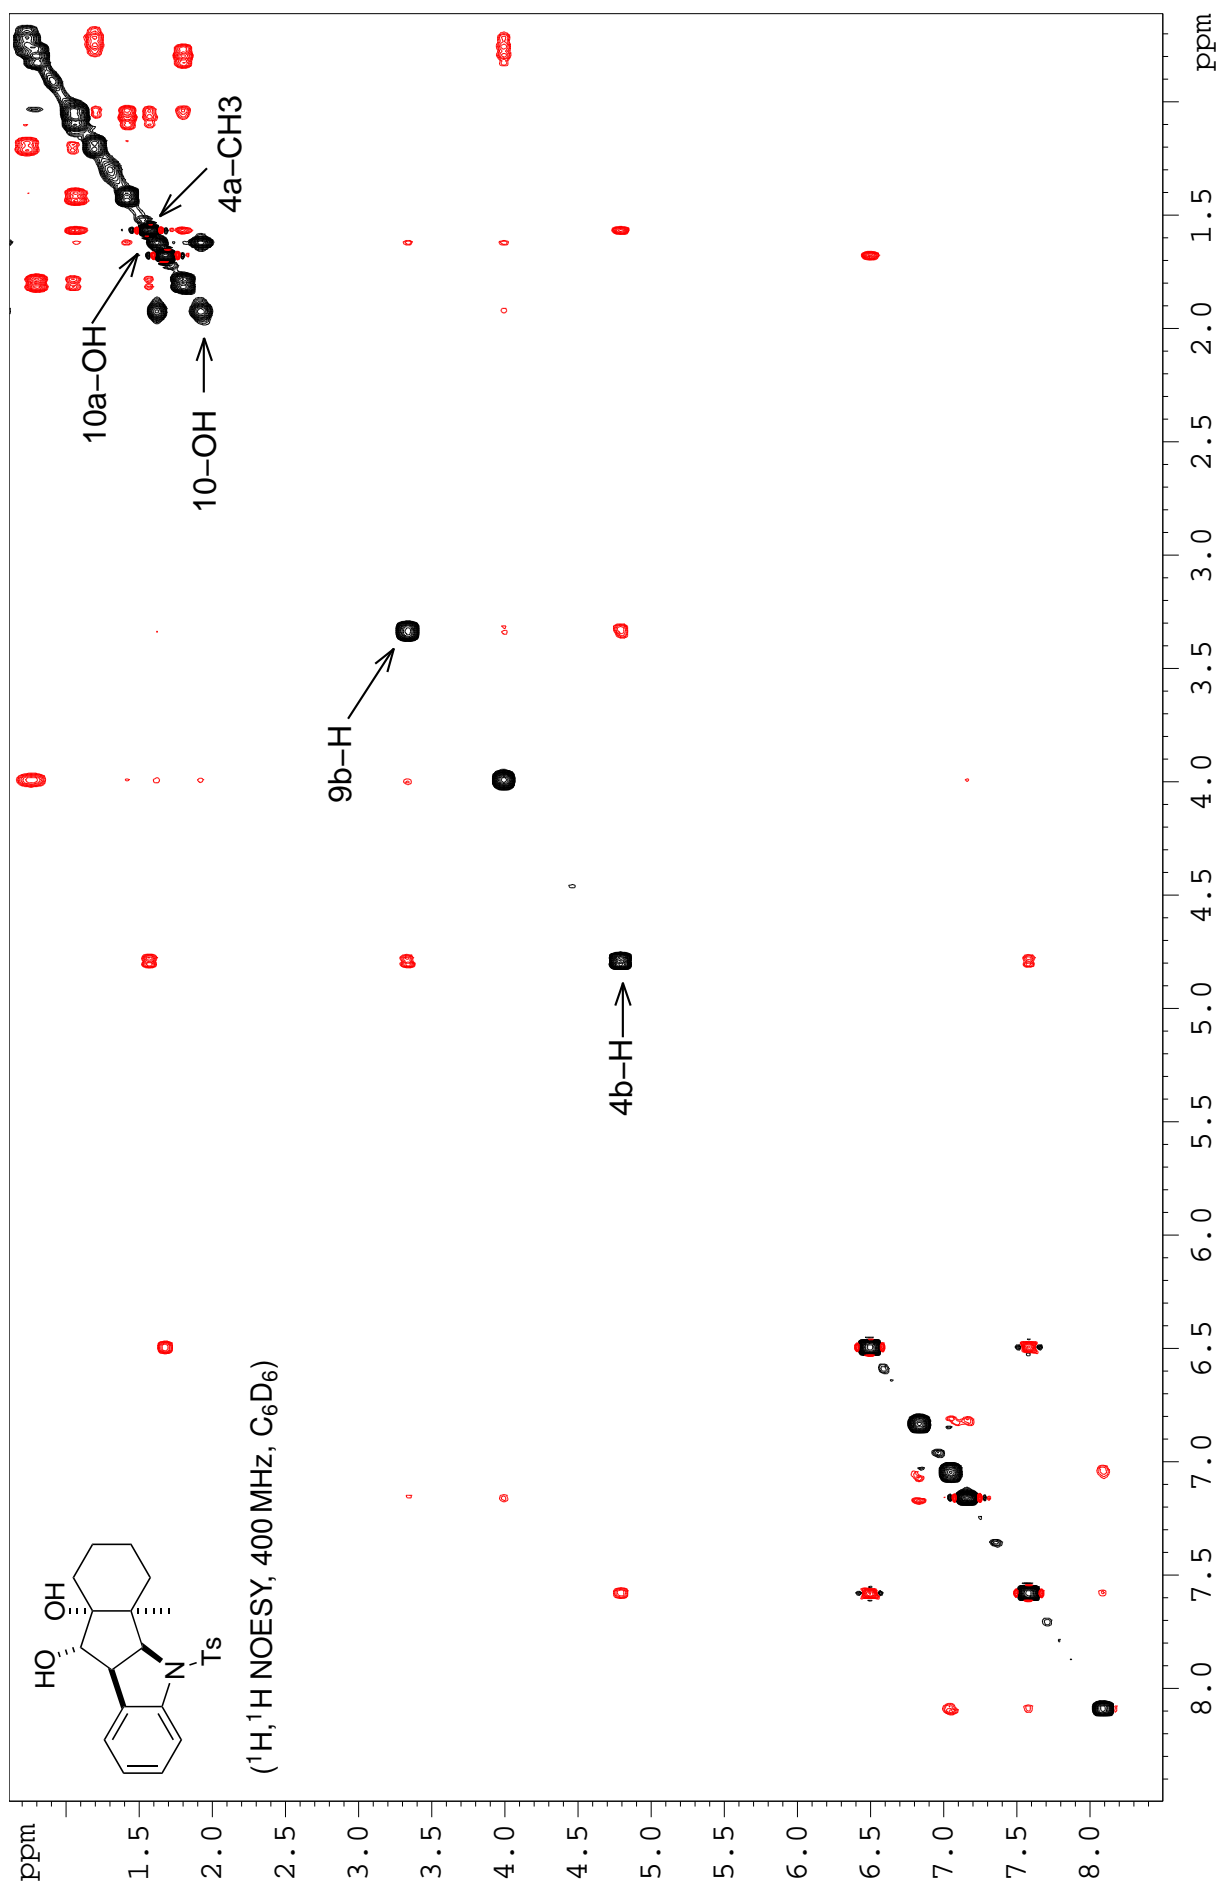

4 NMR spectra of new compounds

**Sulfite 19**

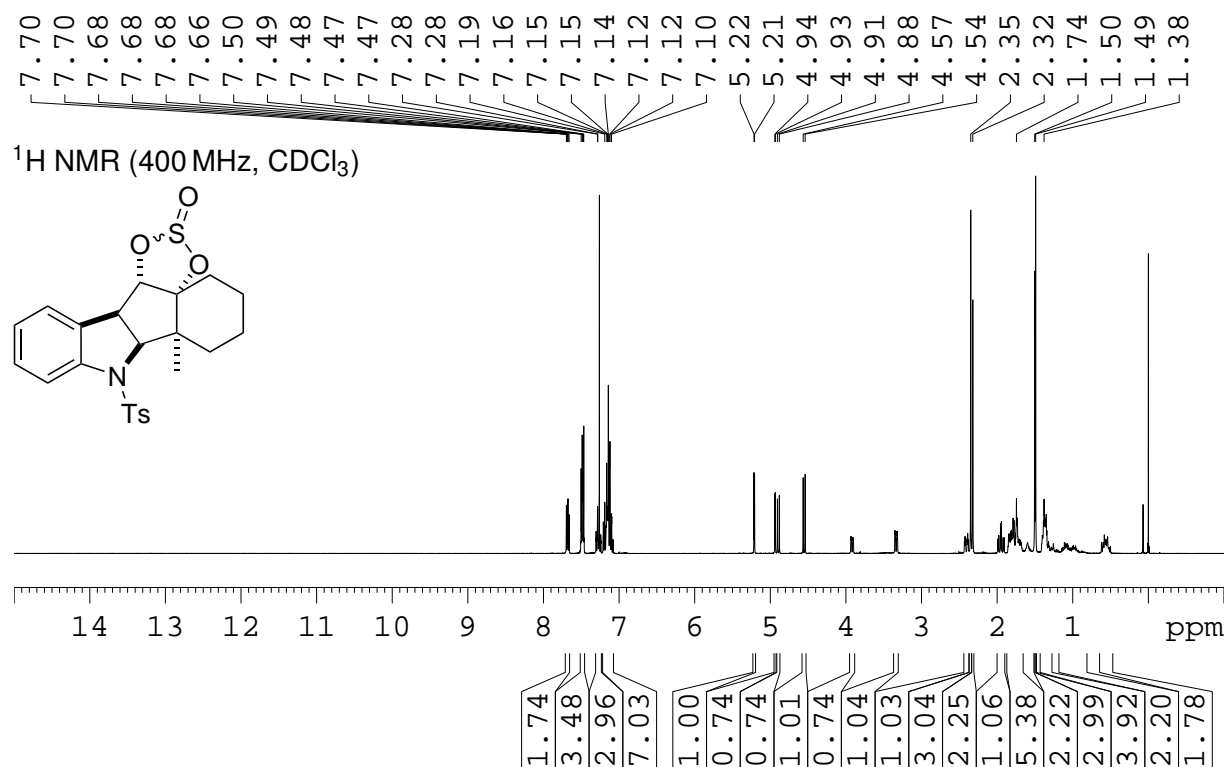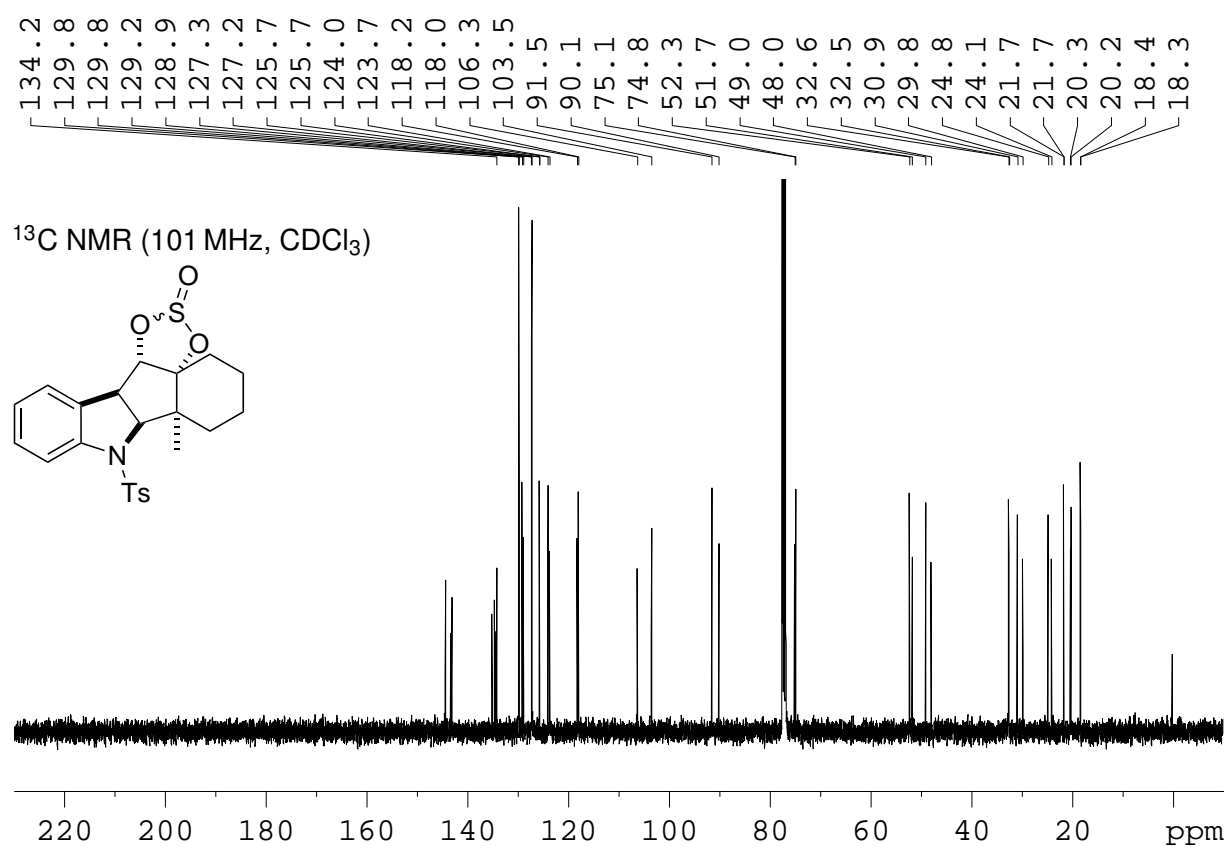

4 NMR spectra of new compounds

***cis*-Hydrindanone 20**

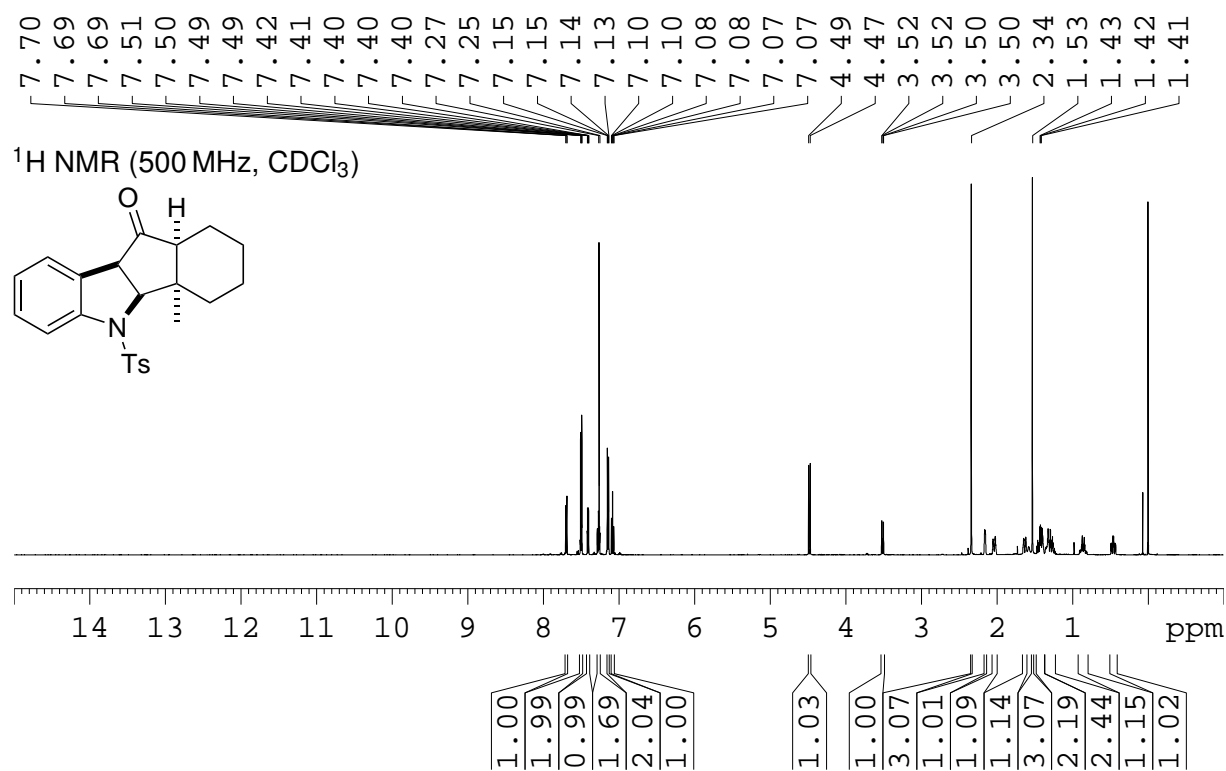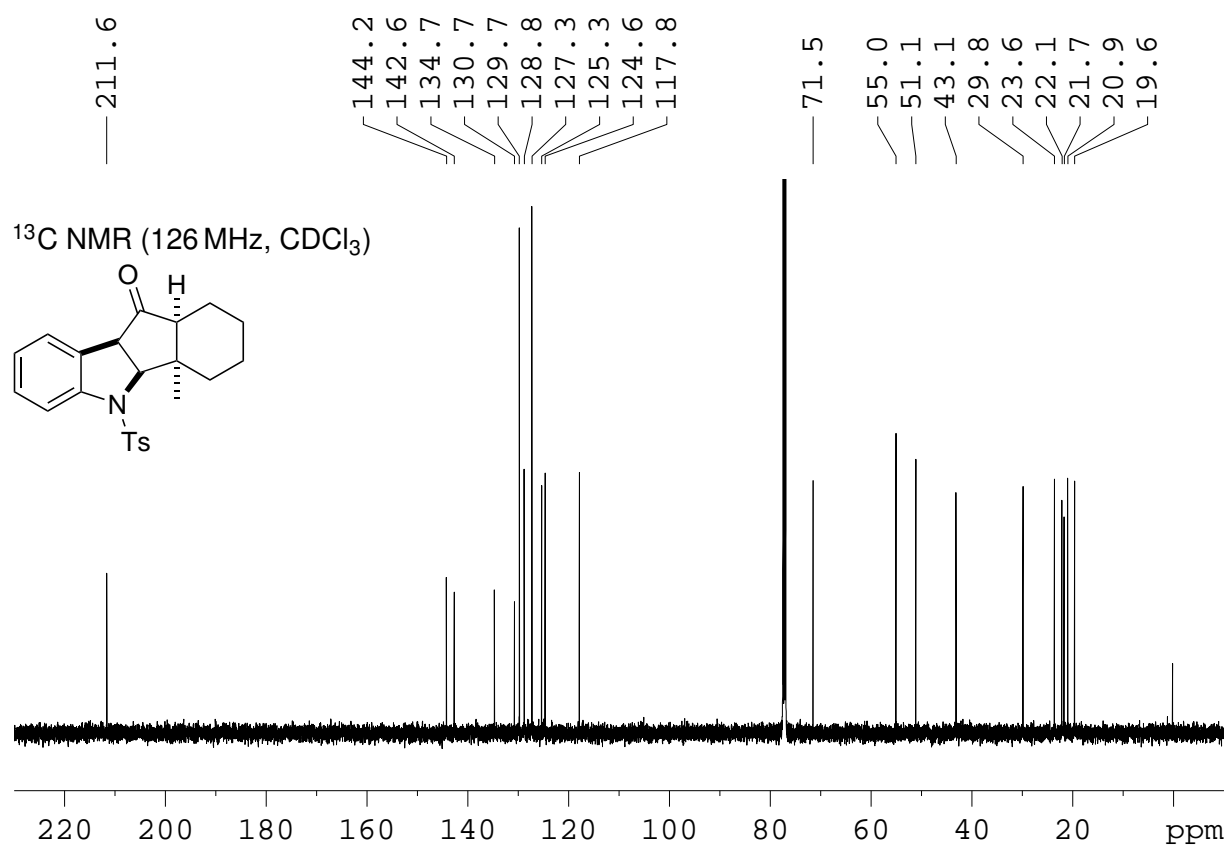

4 NMR spectra of new compounds

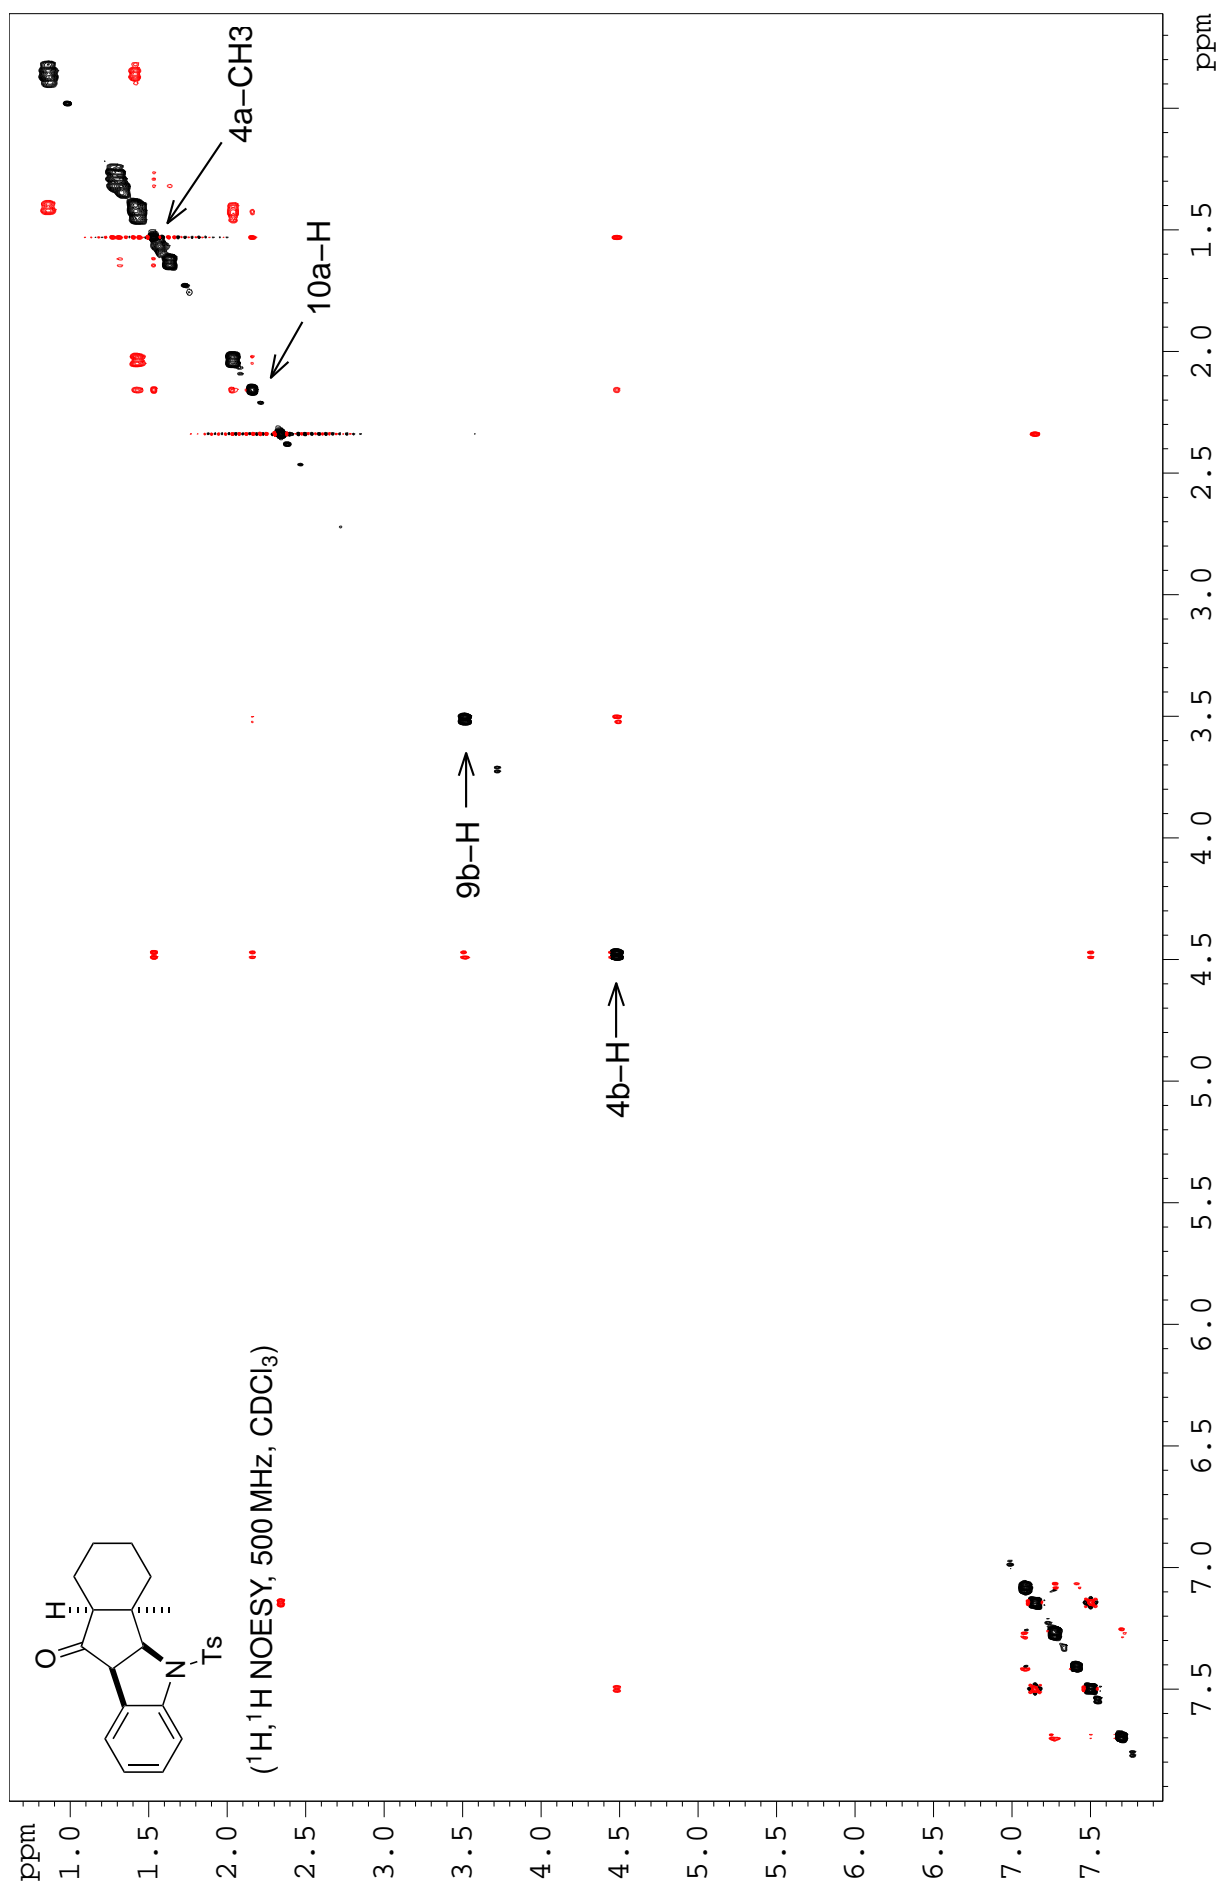

4 NMR spectra of new compounds

***trans*-Hydrindanone 21**

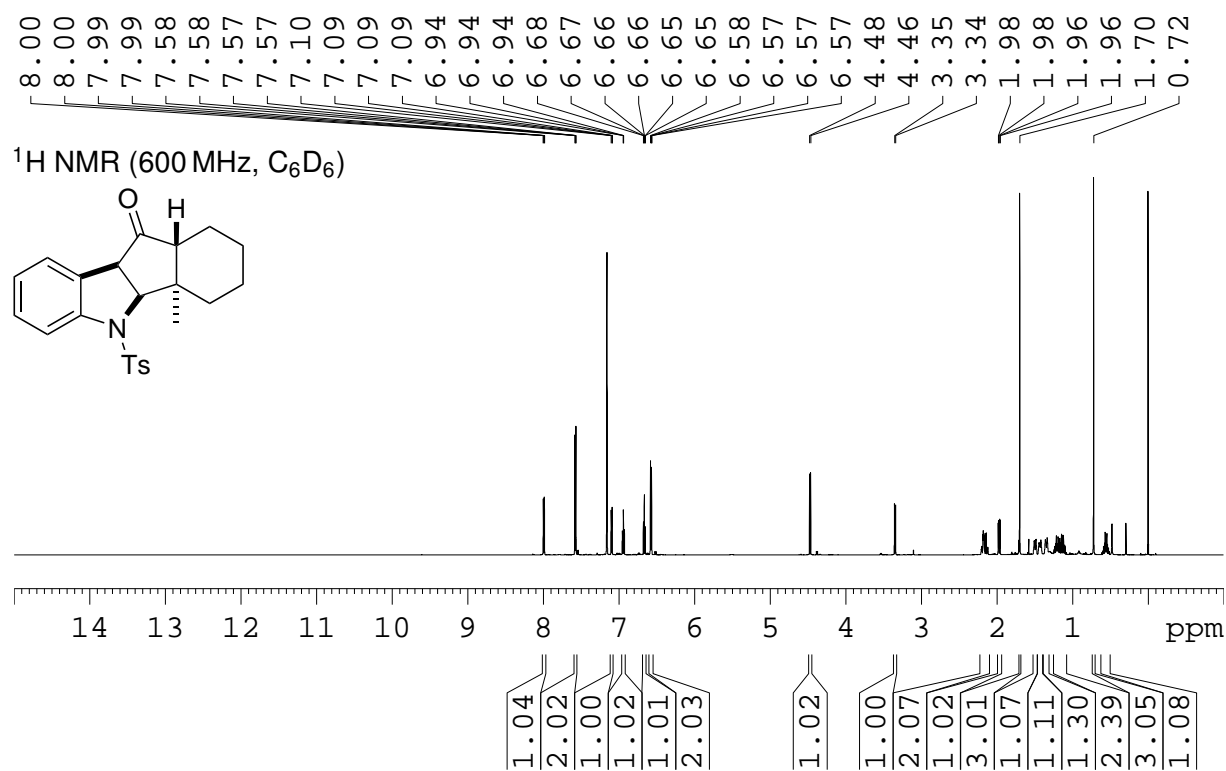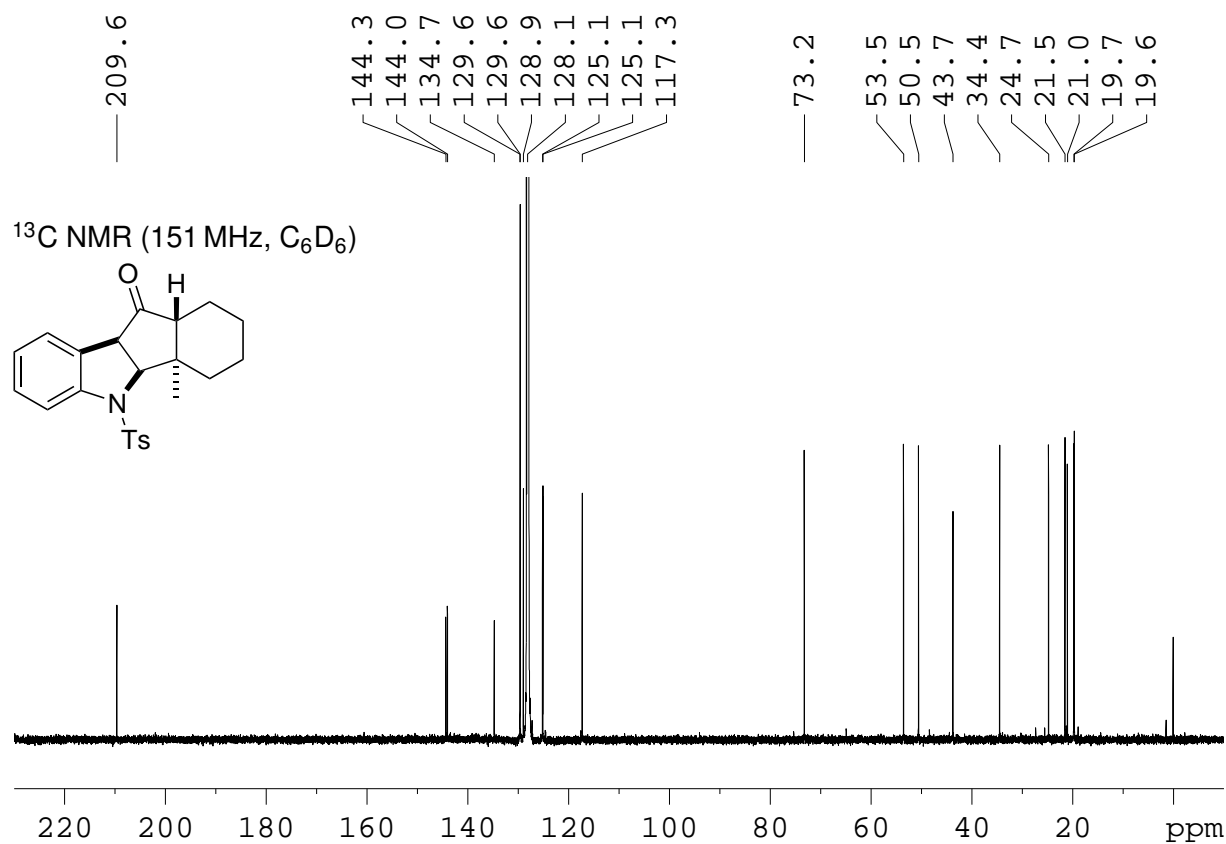

4 NMR spectra of new compounds

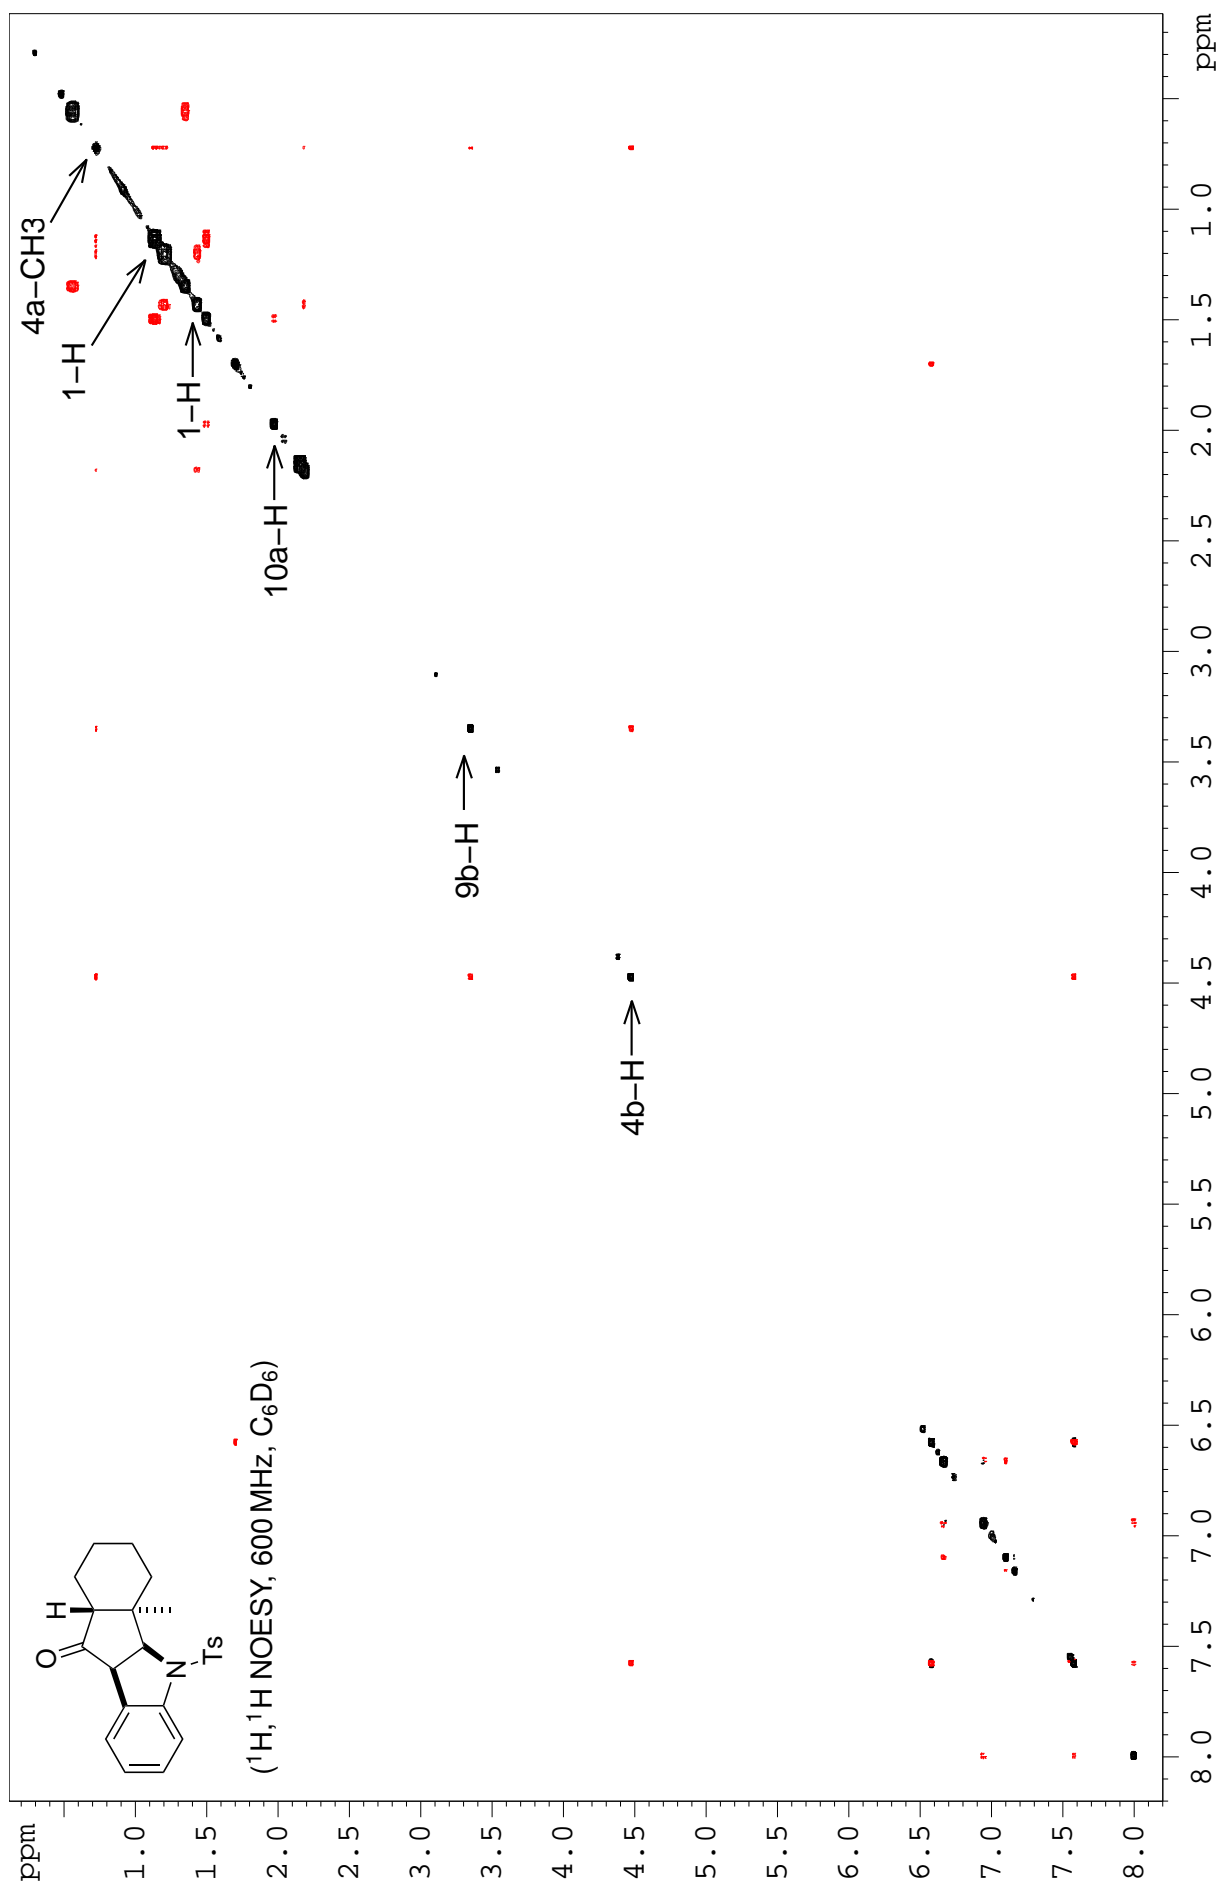

4 NMR spectra of new compounds

**Alcohol S11**

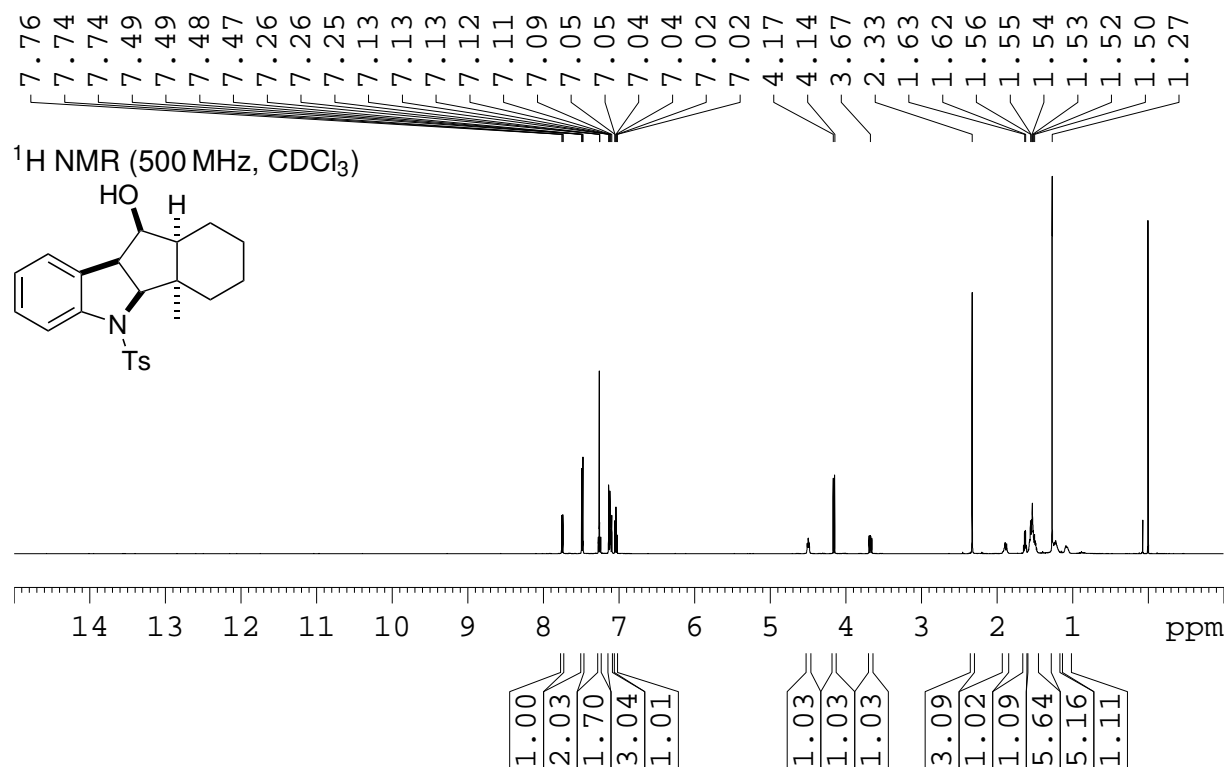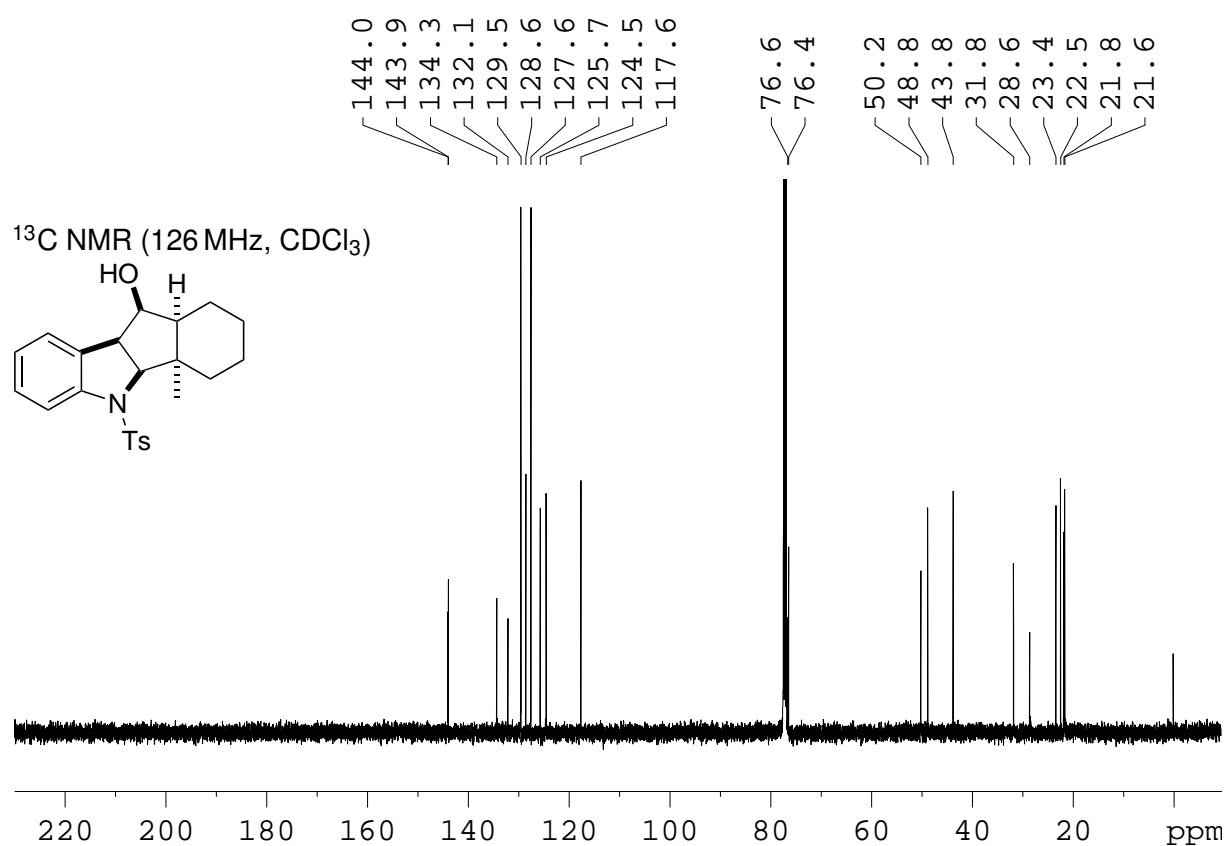



4 NMR spectra of new compounds

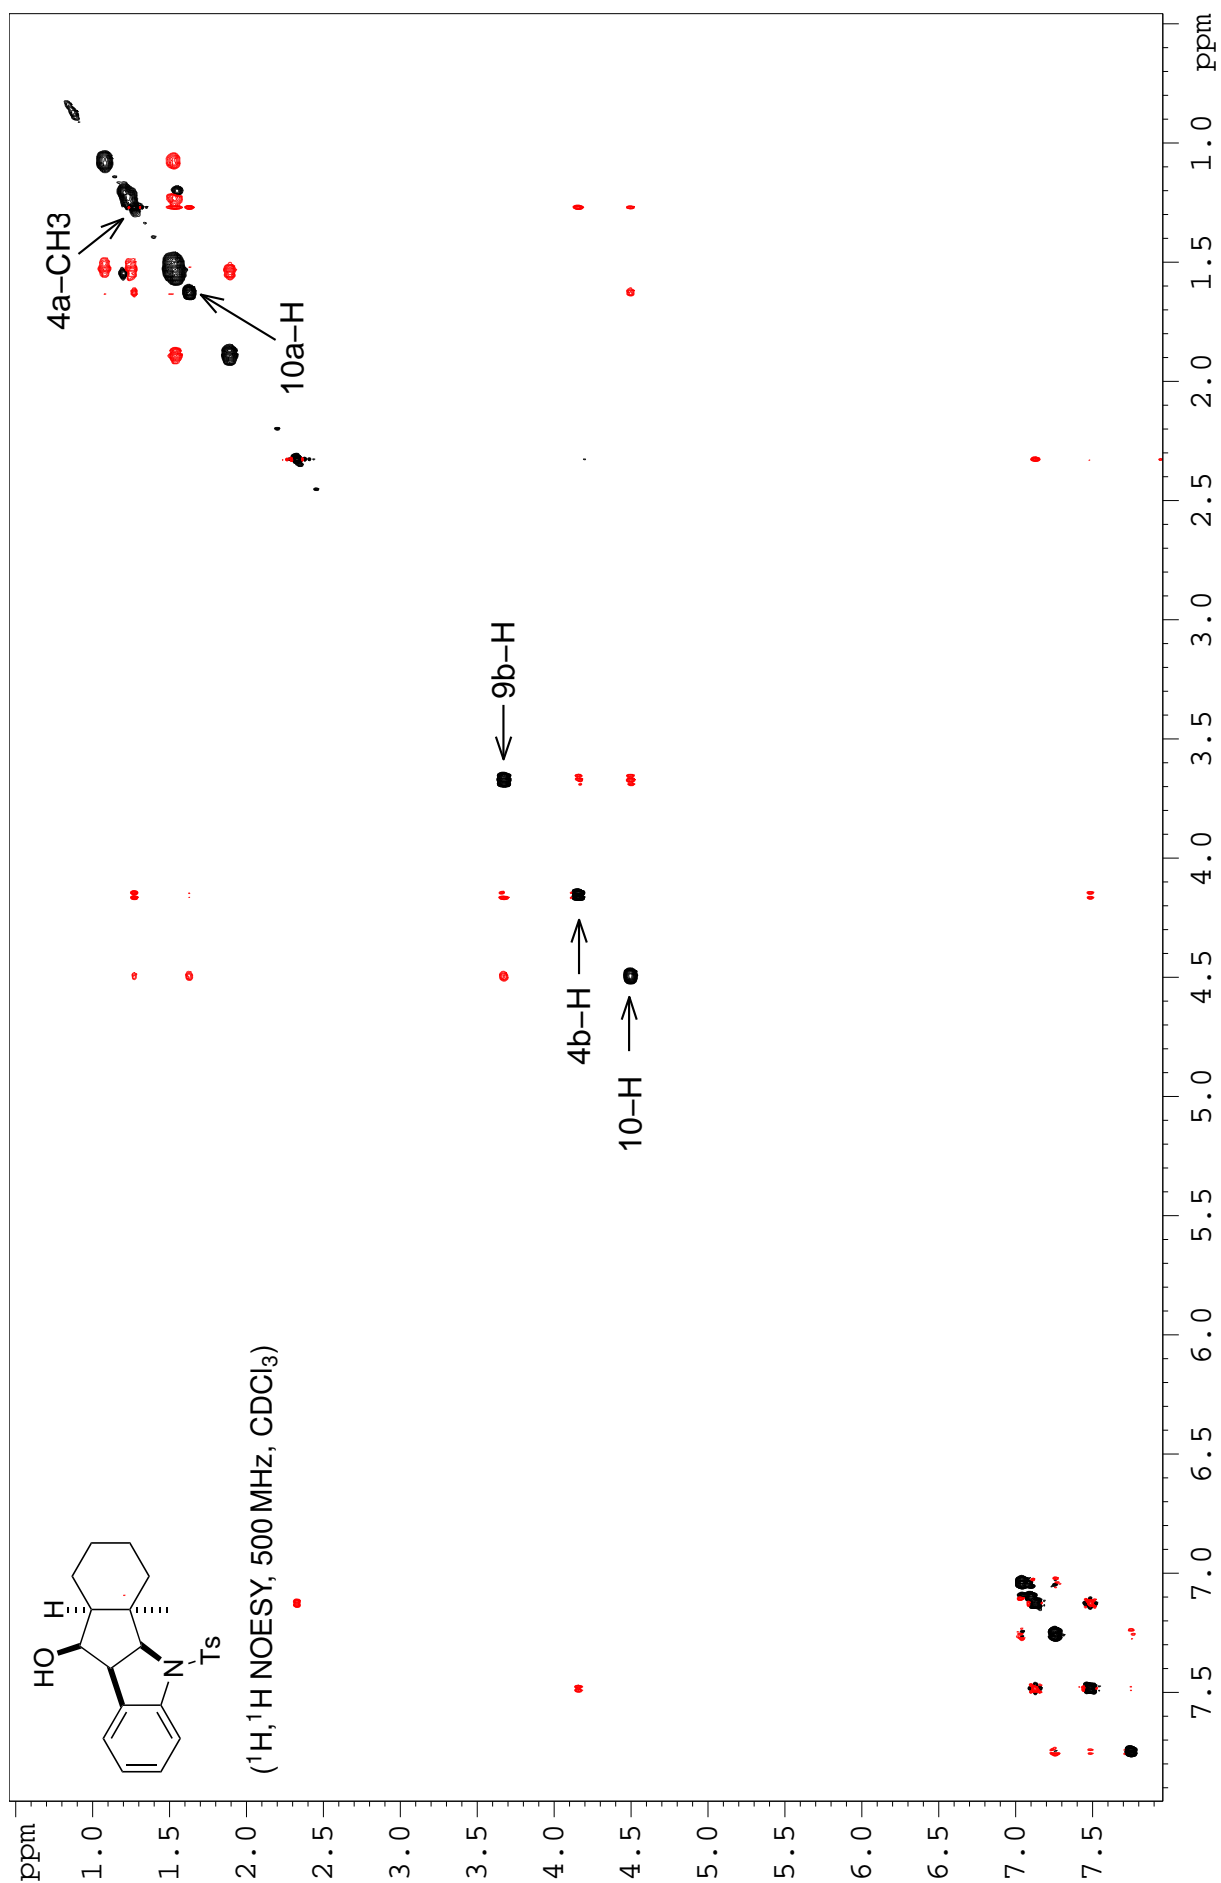

4 NMR spectra of new compounds

**Silyl ether S13**

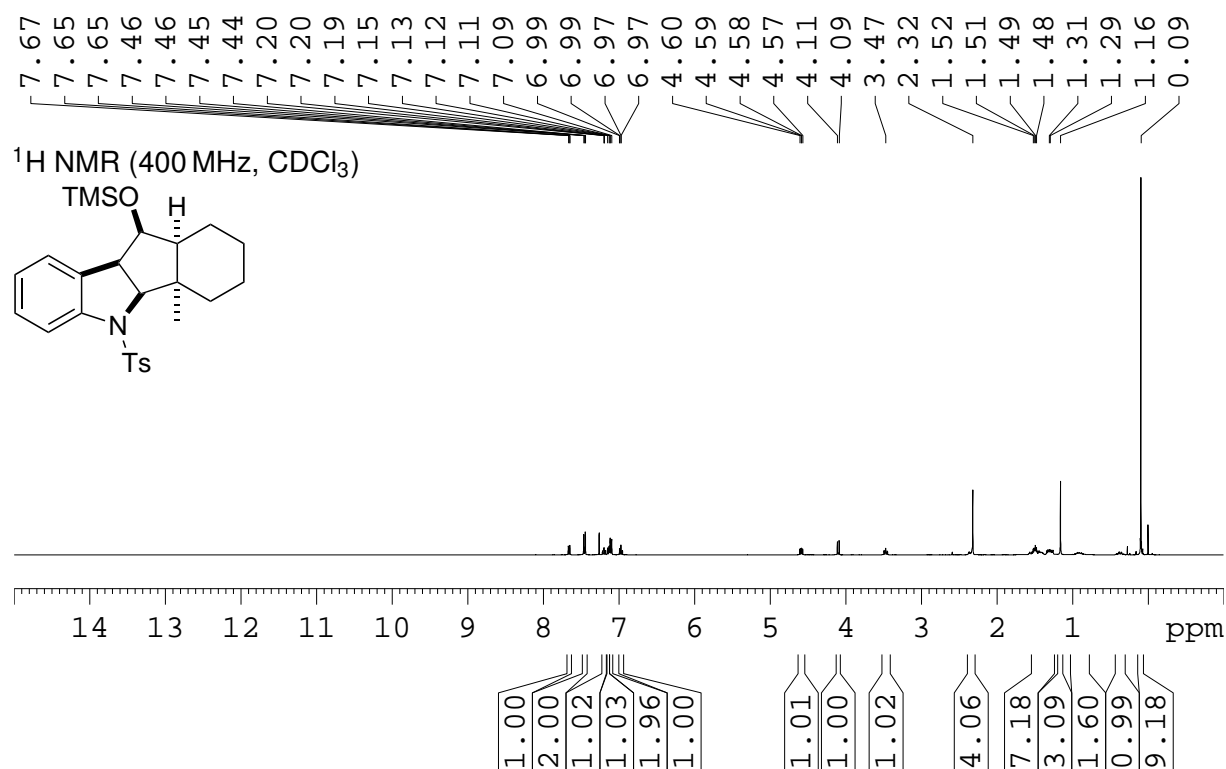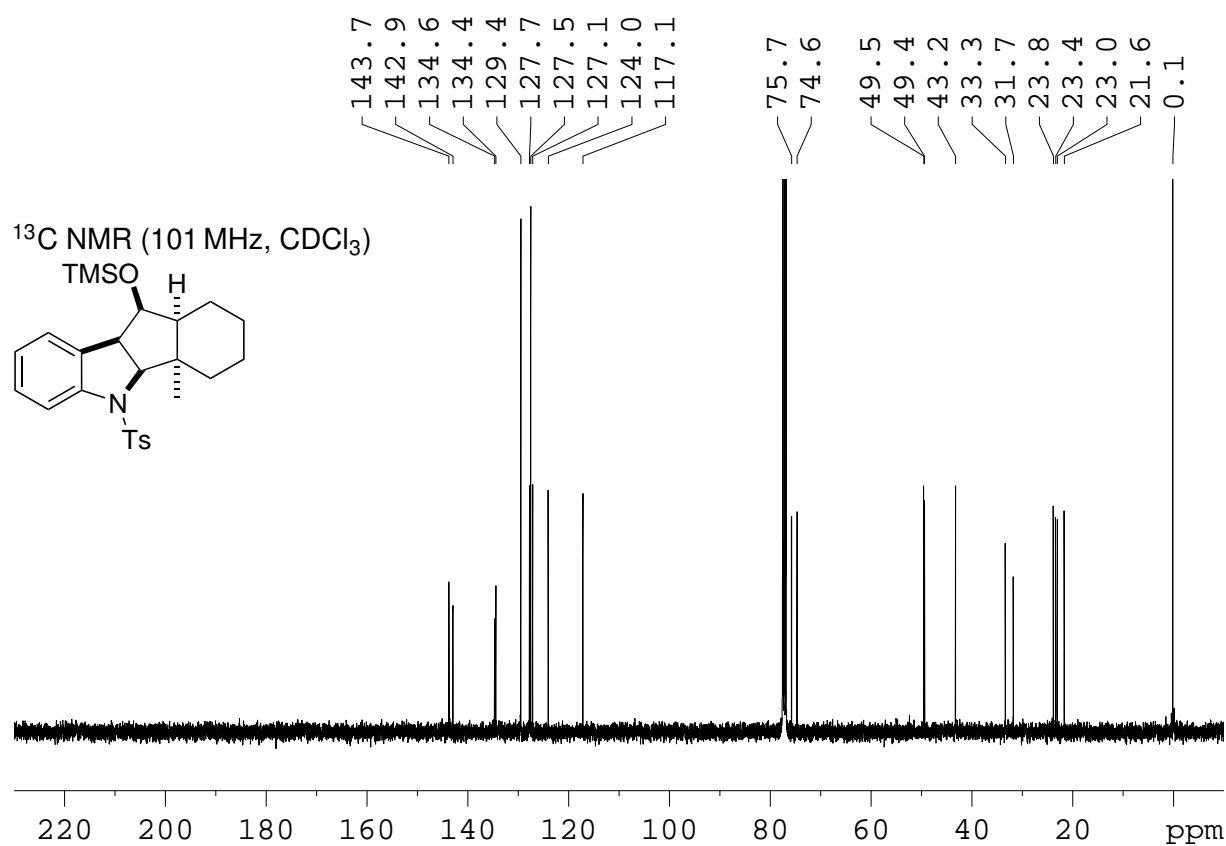

4 NMR spectra of new compounds

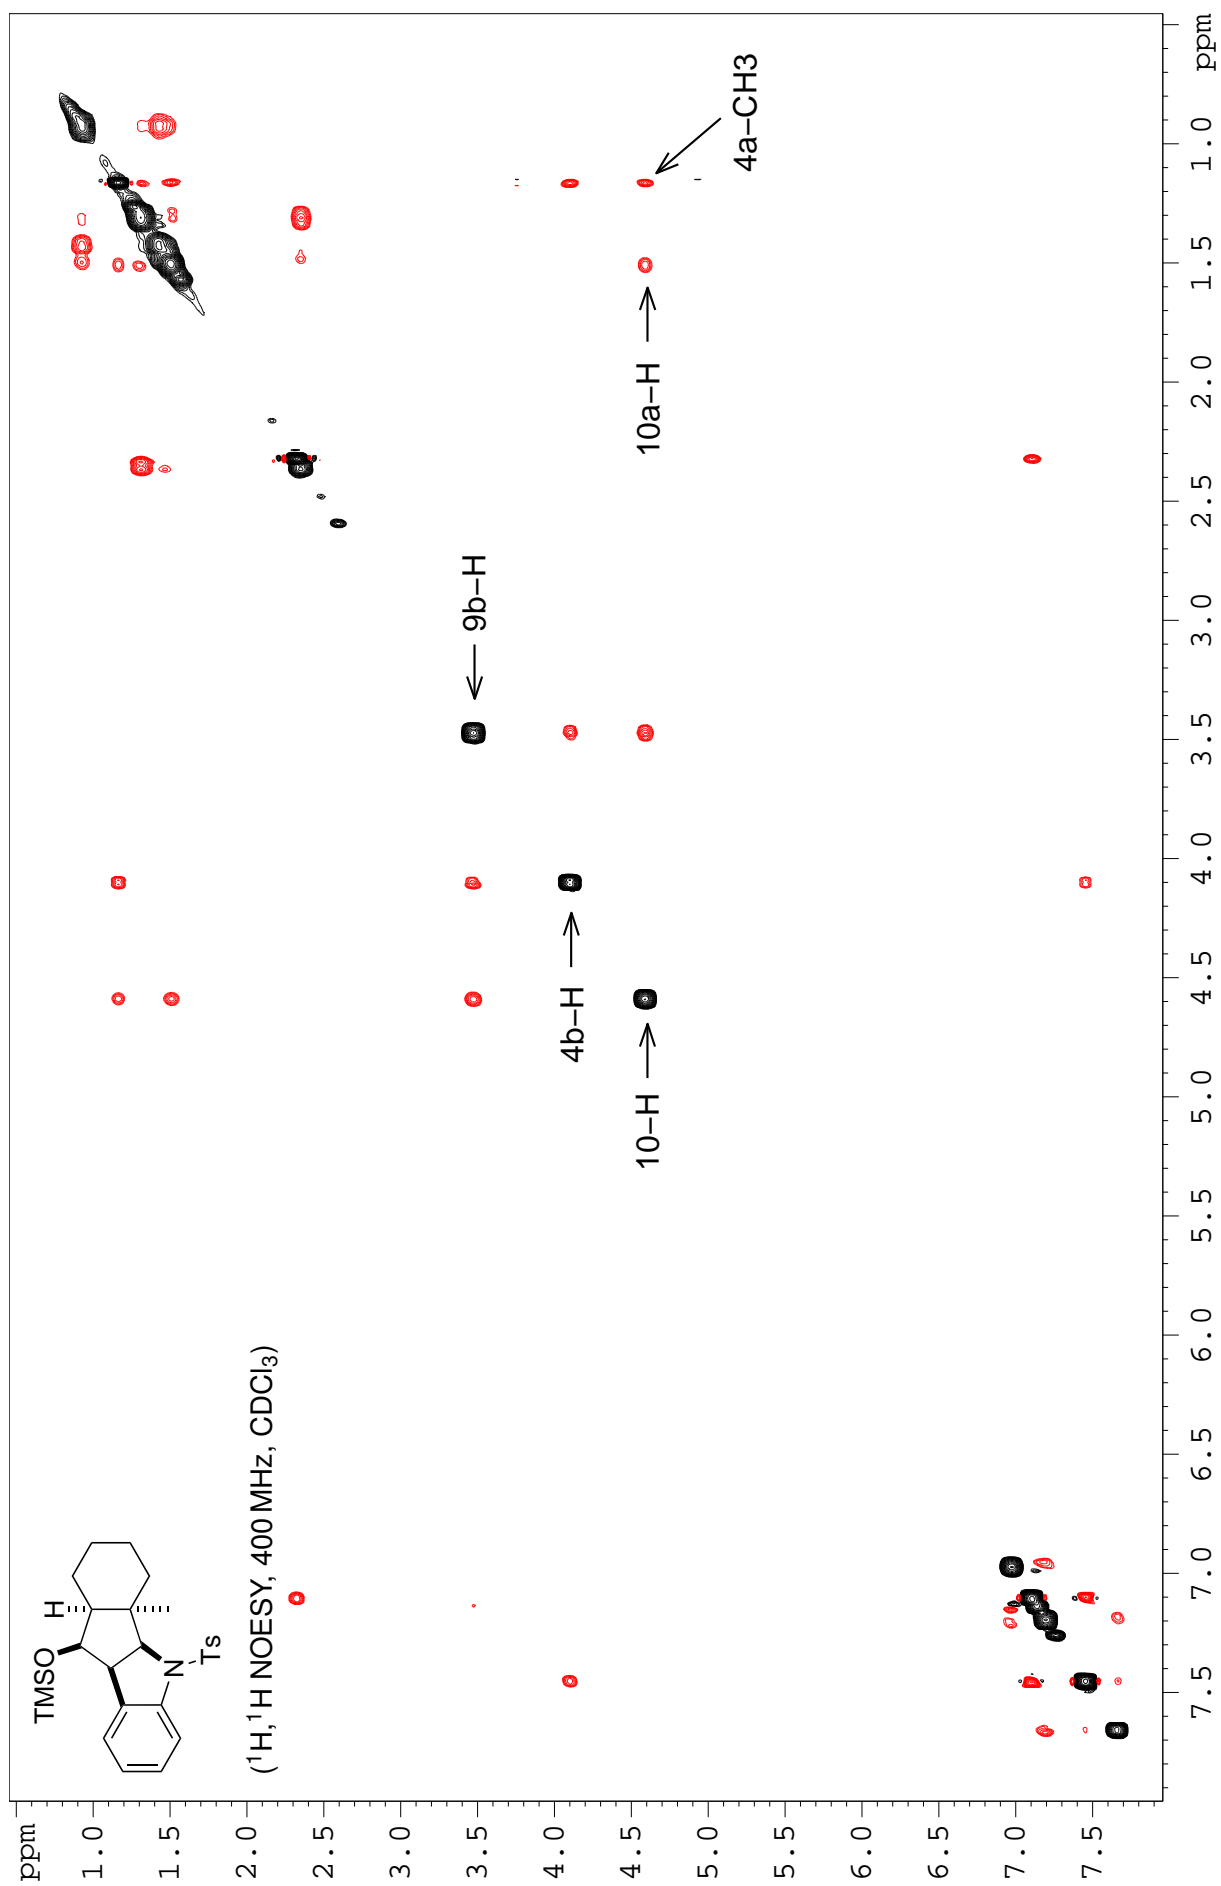

4 NMR spectra of new compounds

**Xanthate S12**

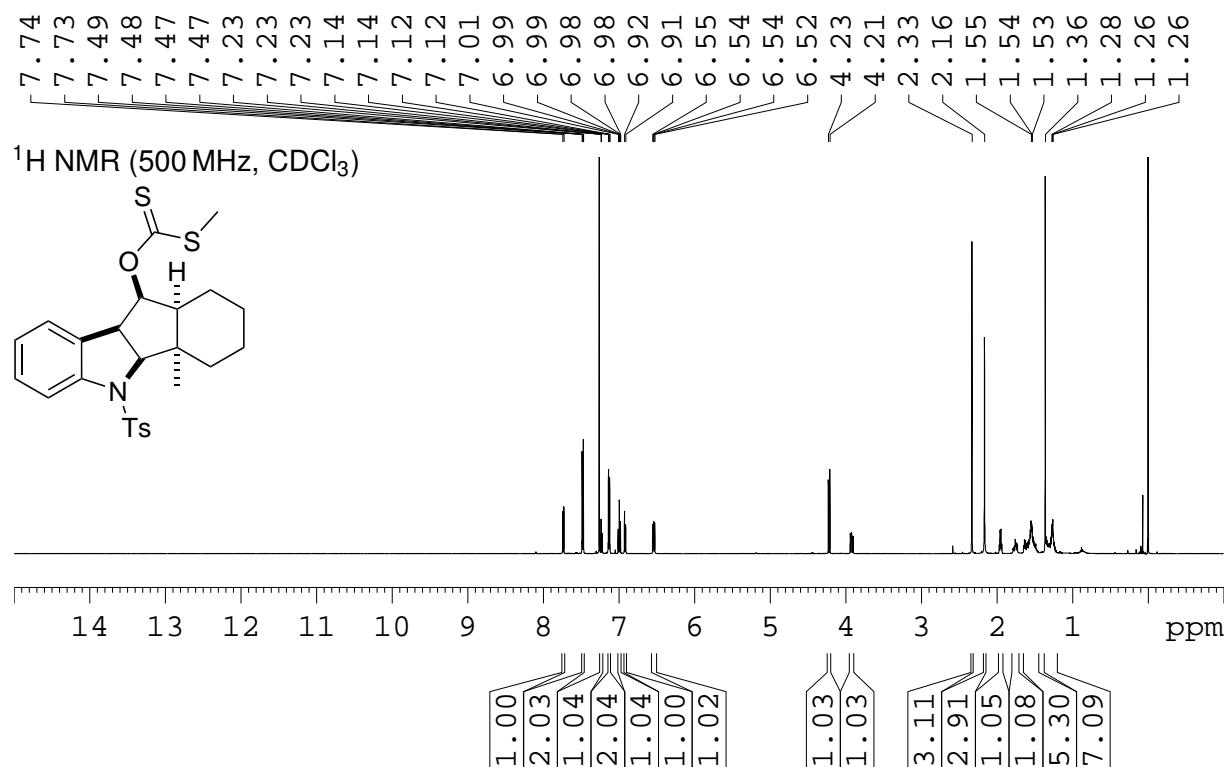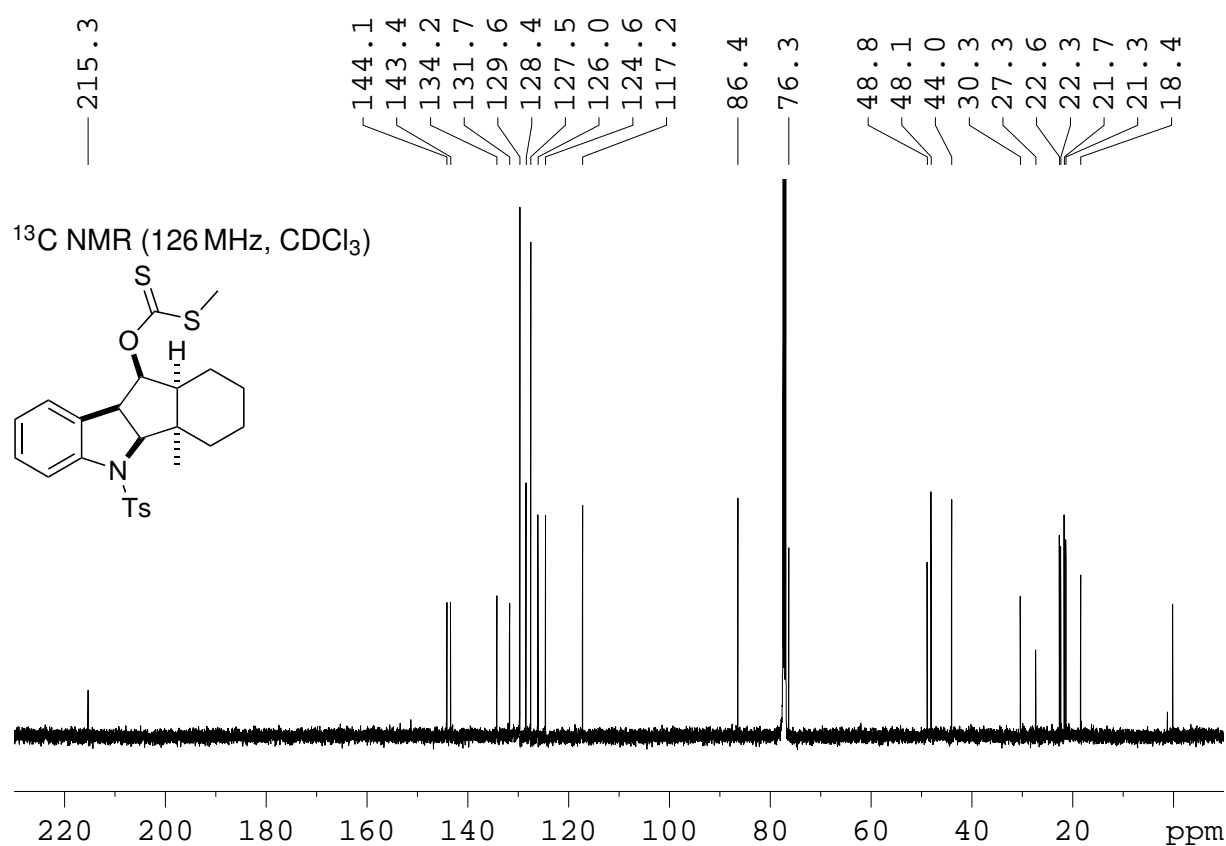

4 NMR spectra of new compounds

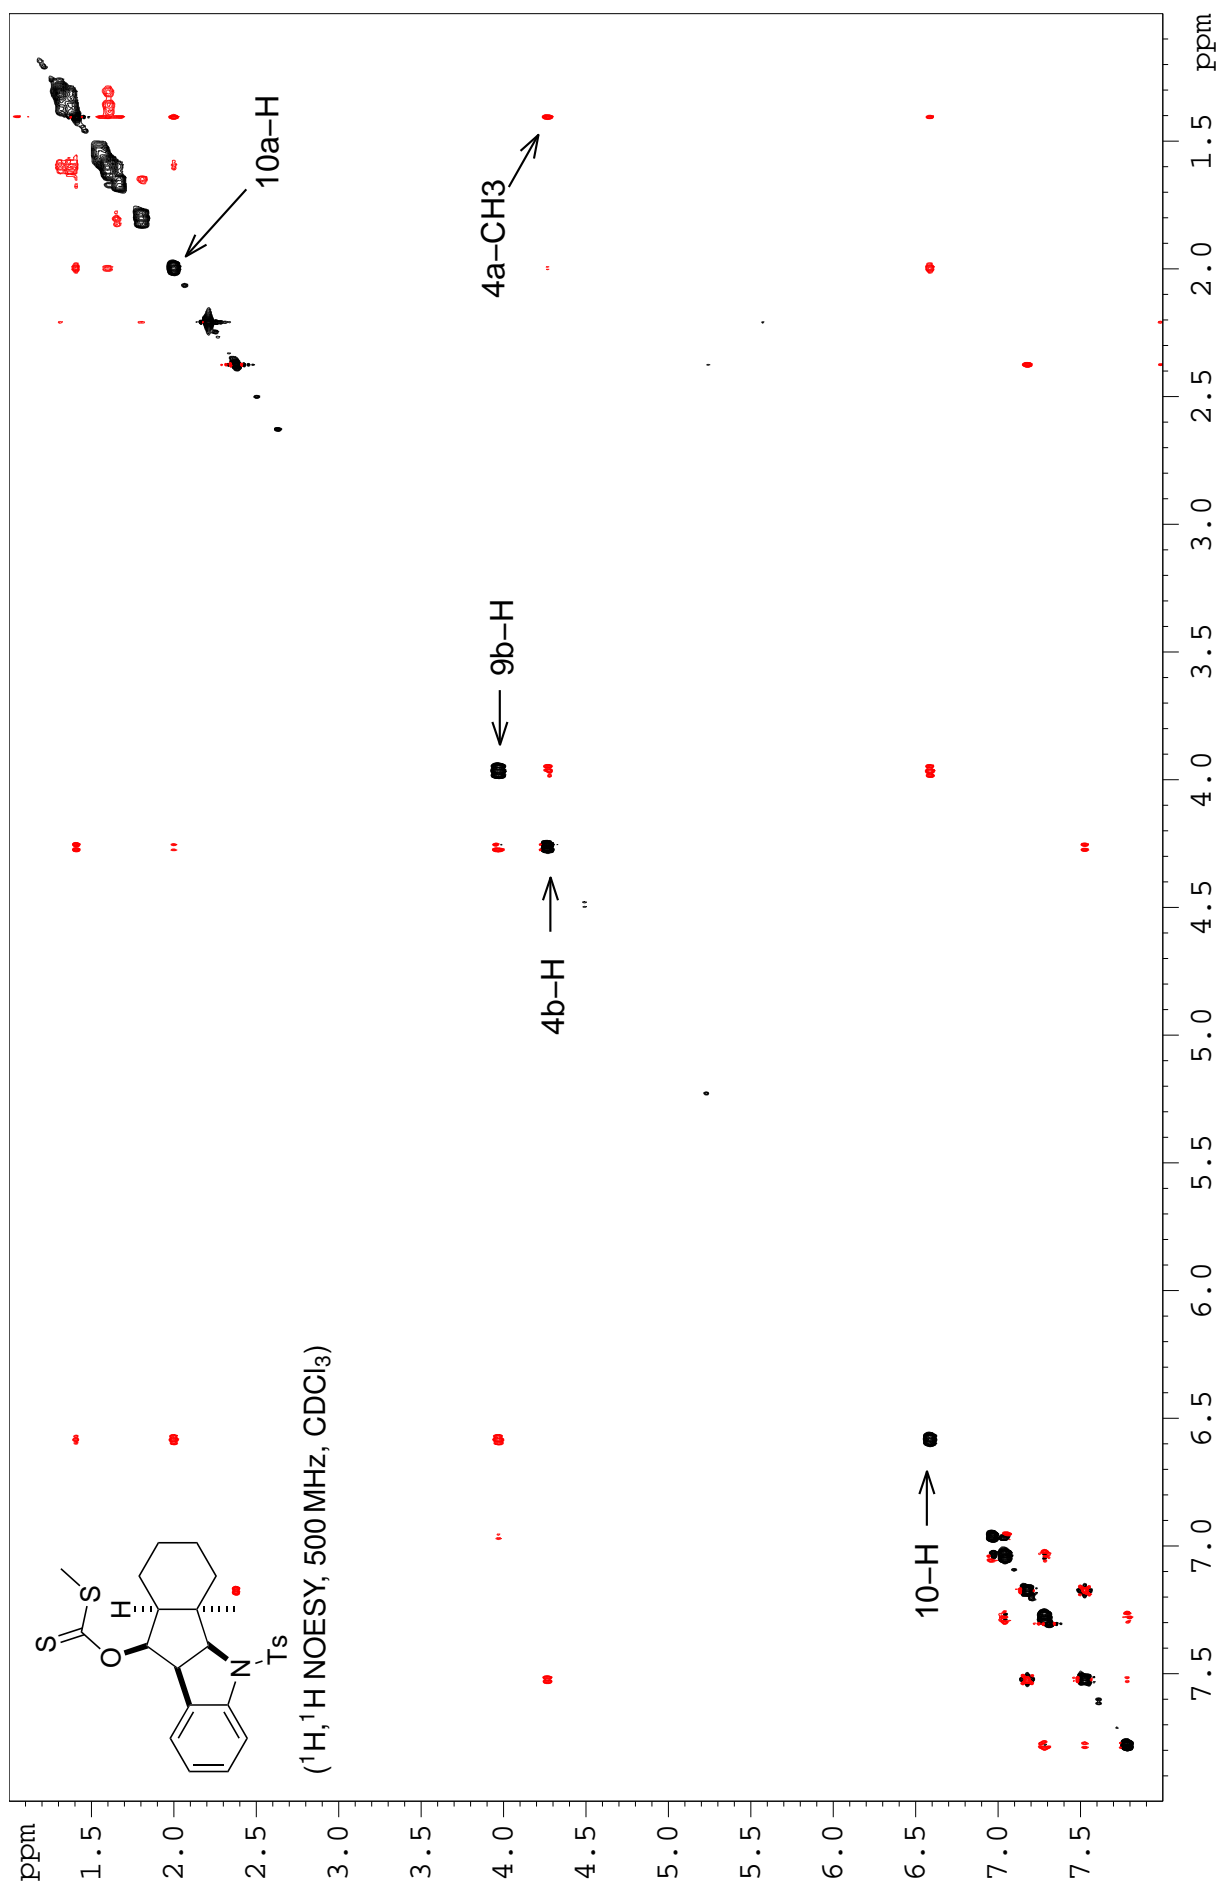

4 NMR spectra of new compounds

***cis*-Hydrindane S14**

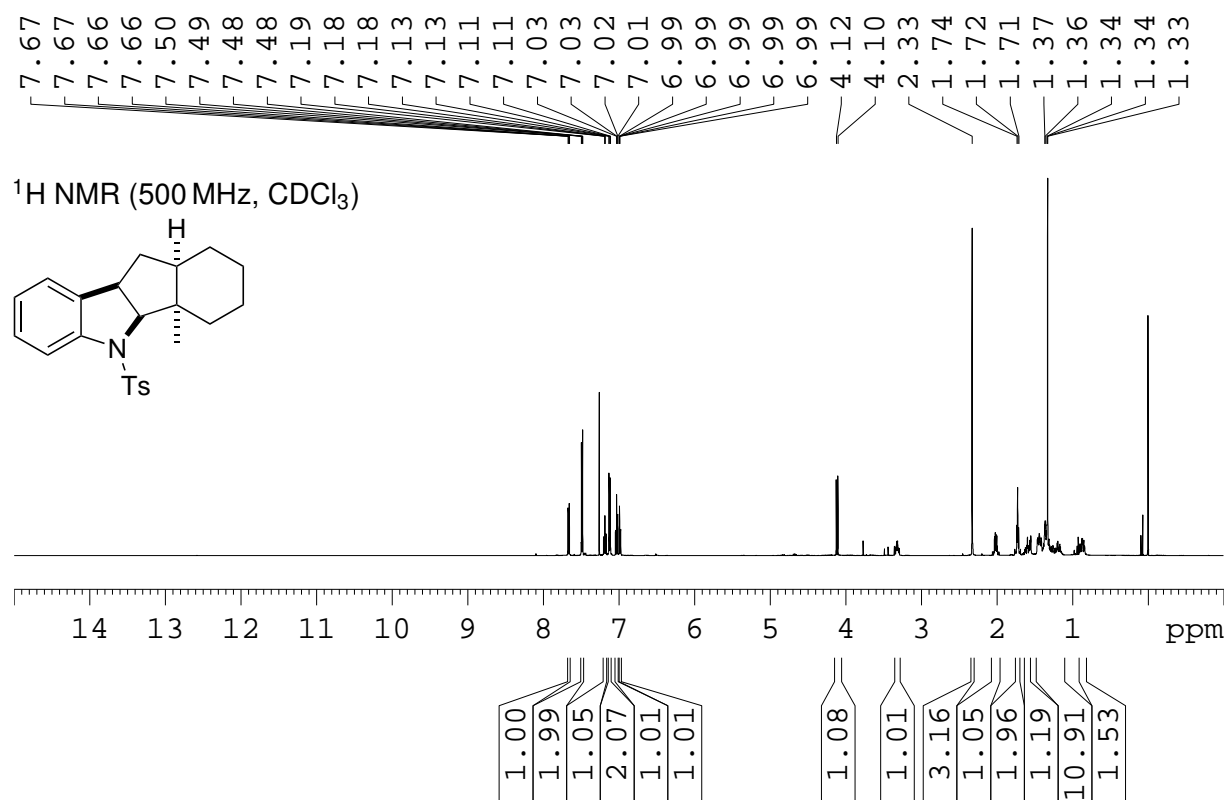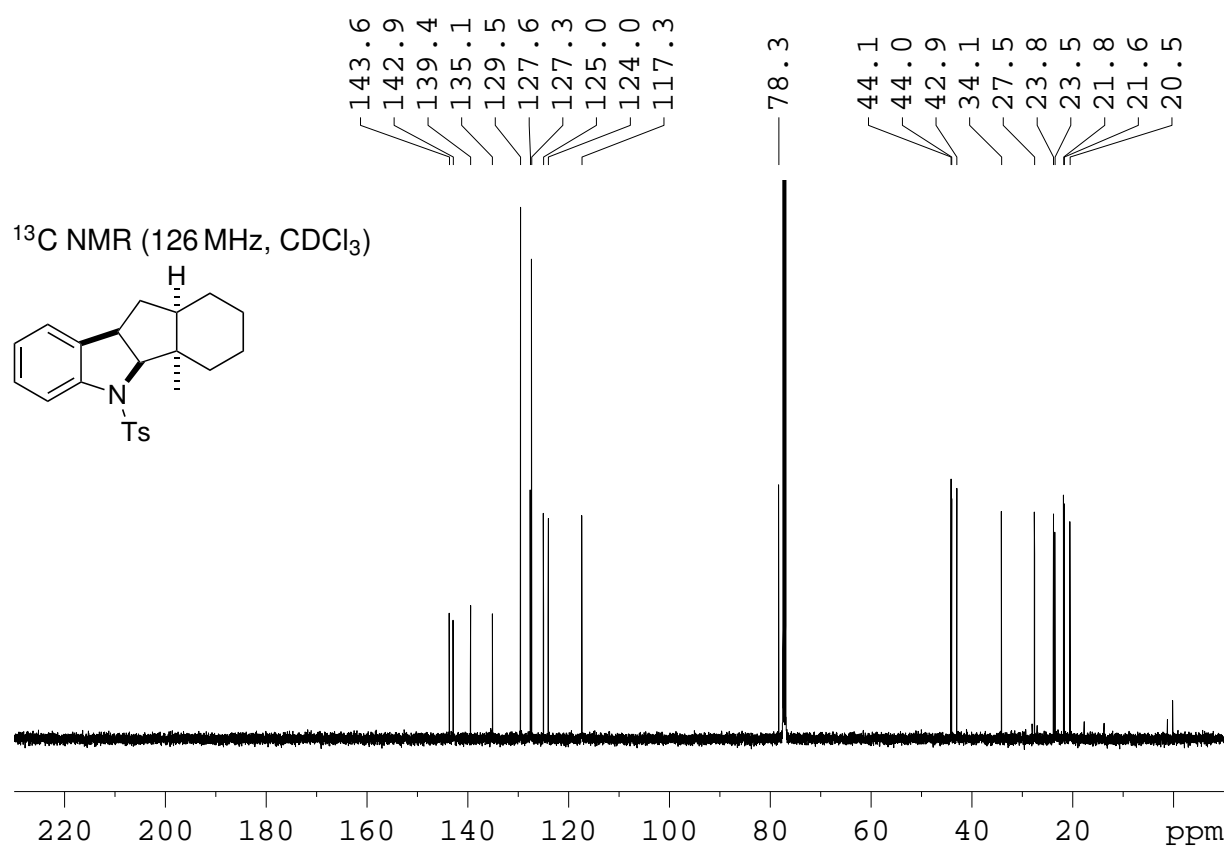

4 NMR spectra of new compounds

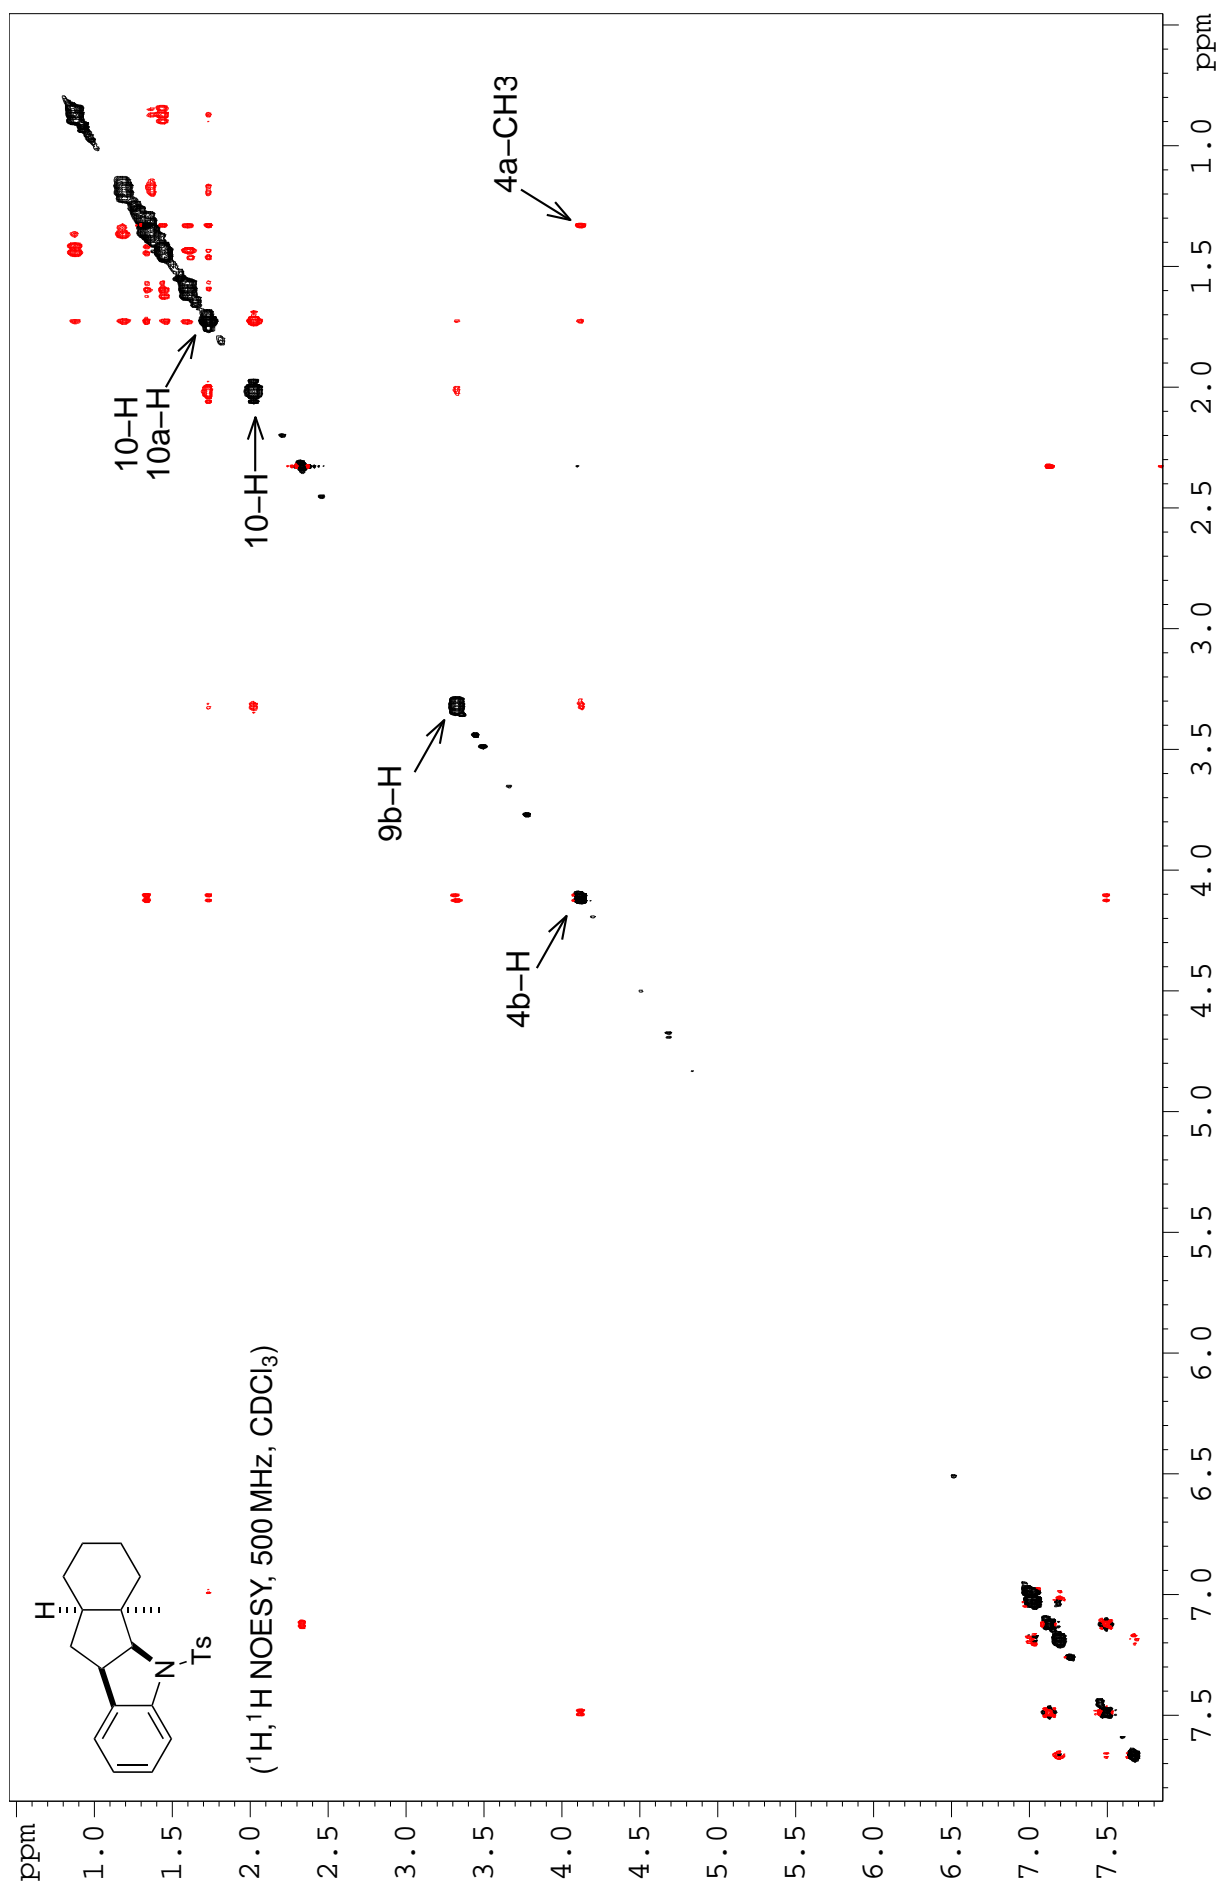

4 NMR spectra of new compounds

**Alcohols S15 and S22**

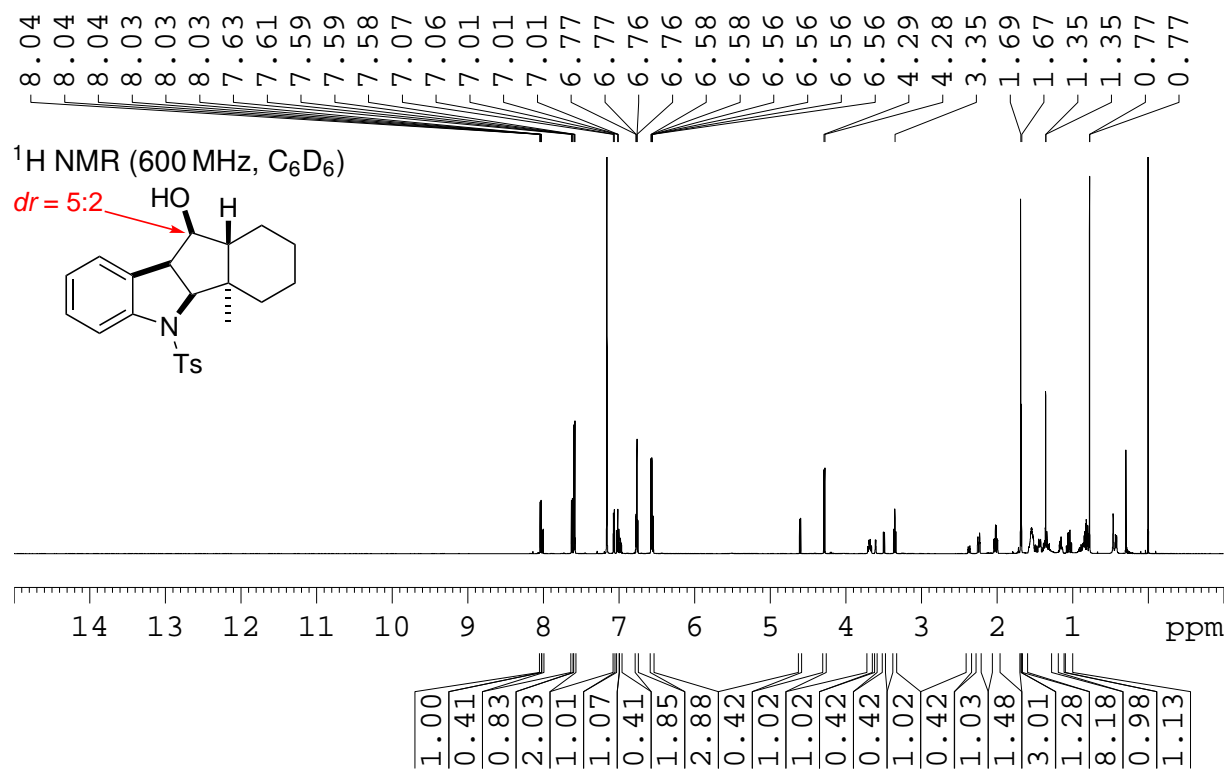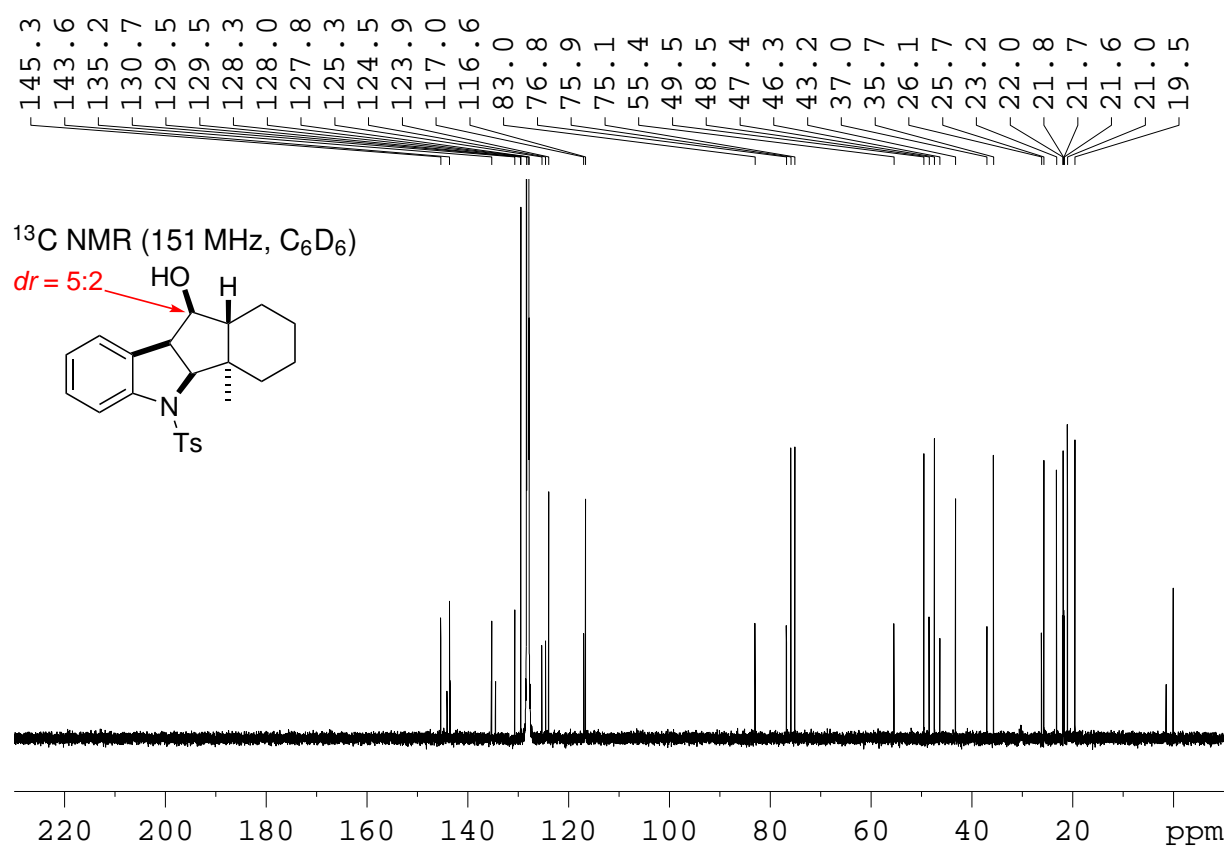



4 NMR spectra of new compounds

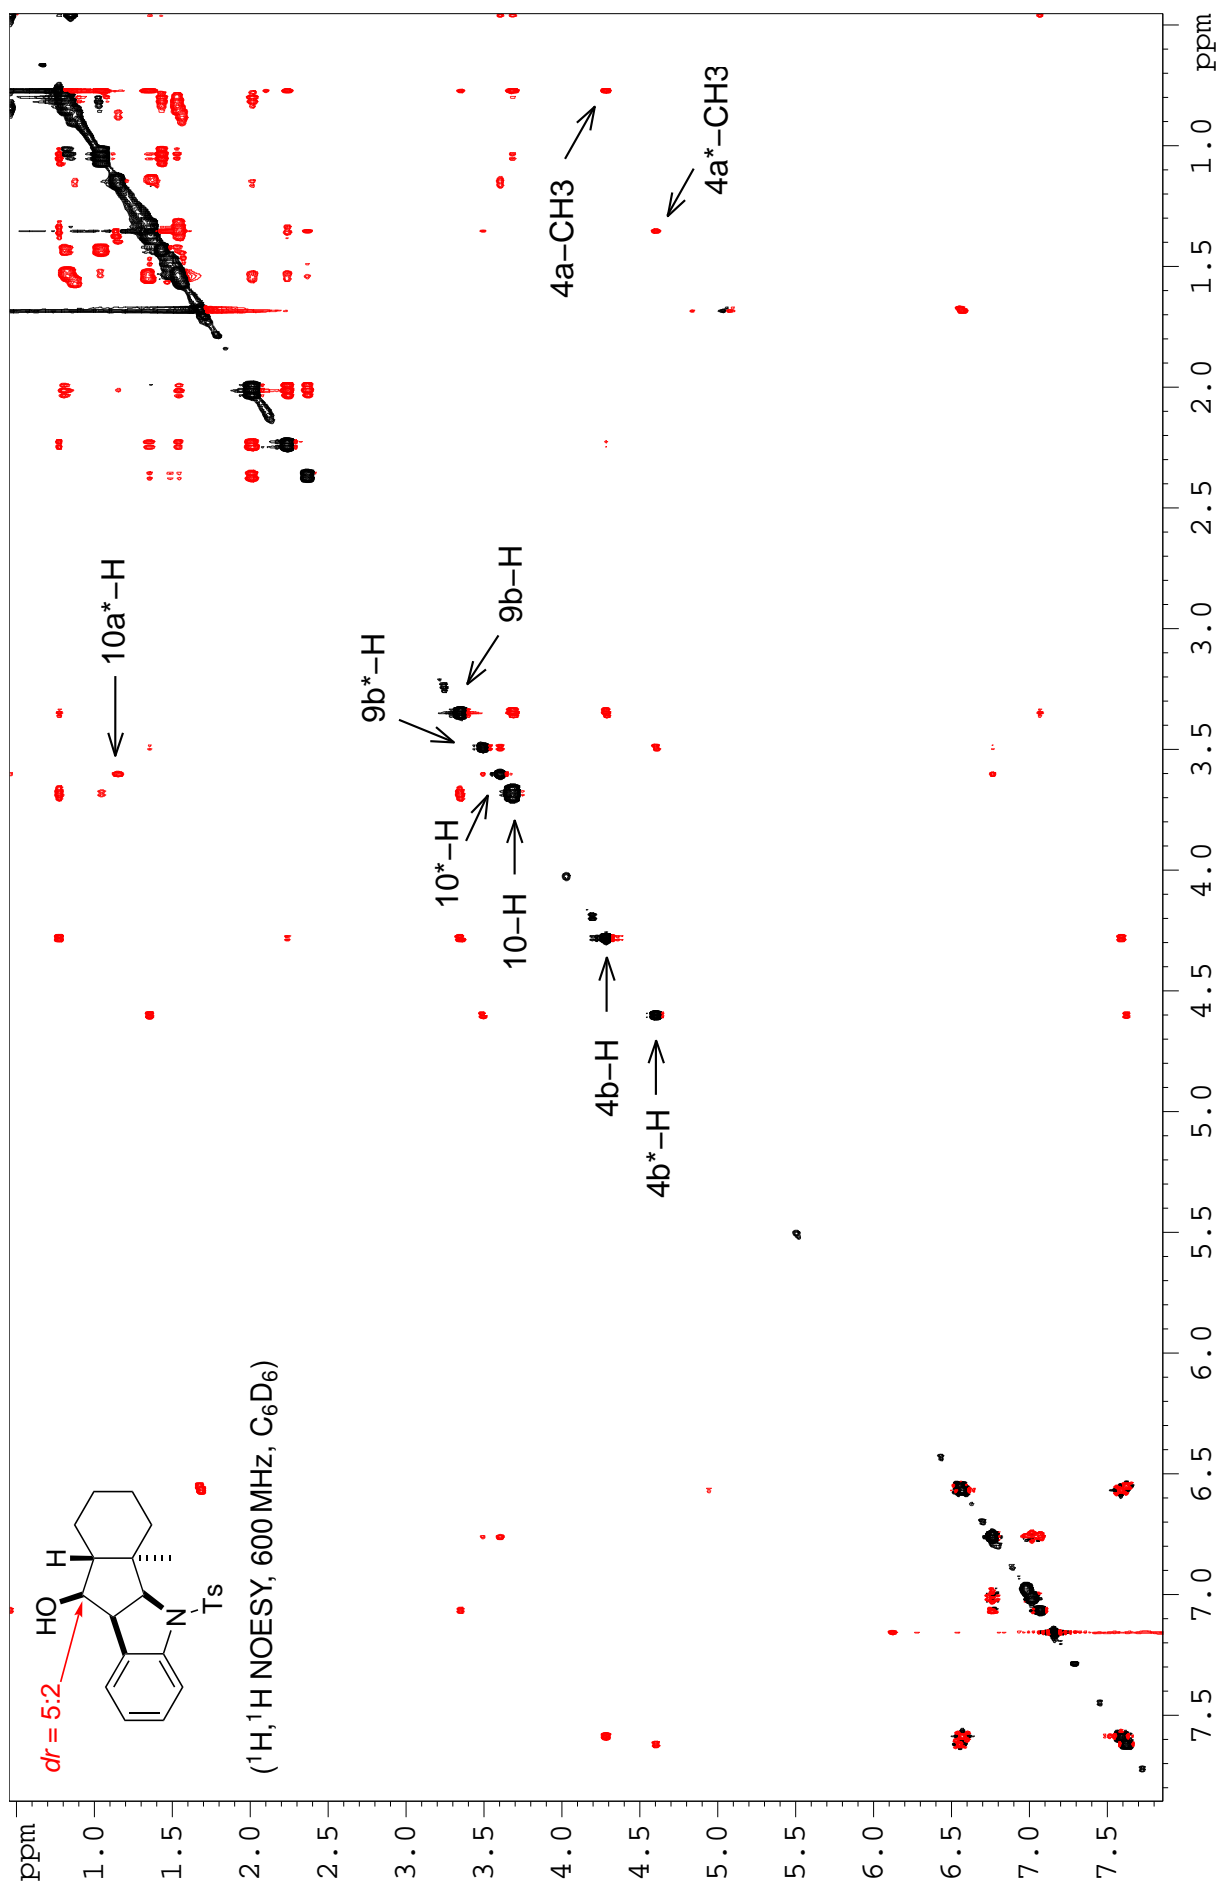

4 NMR spectra of new compounds

**Xanthates S16 and S23**

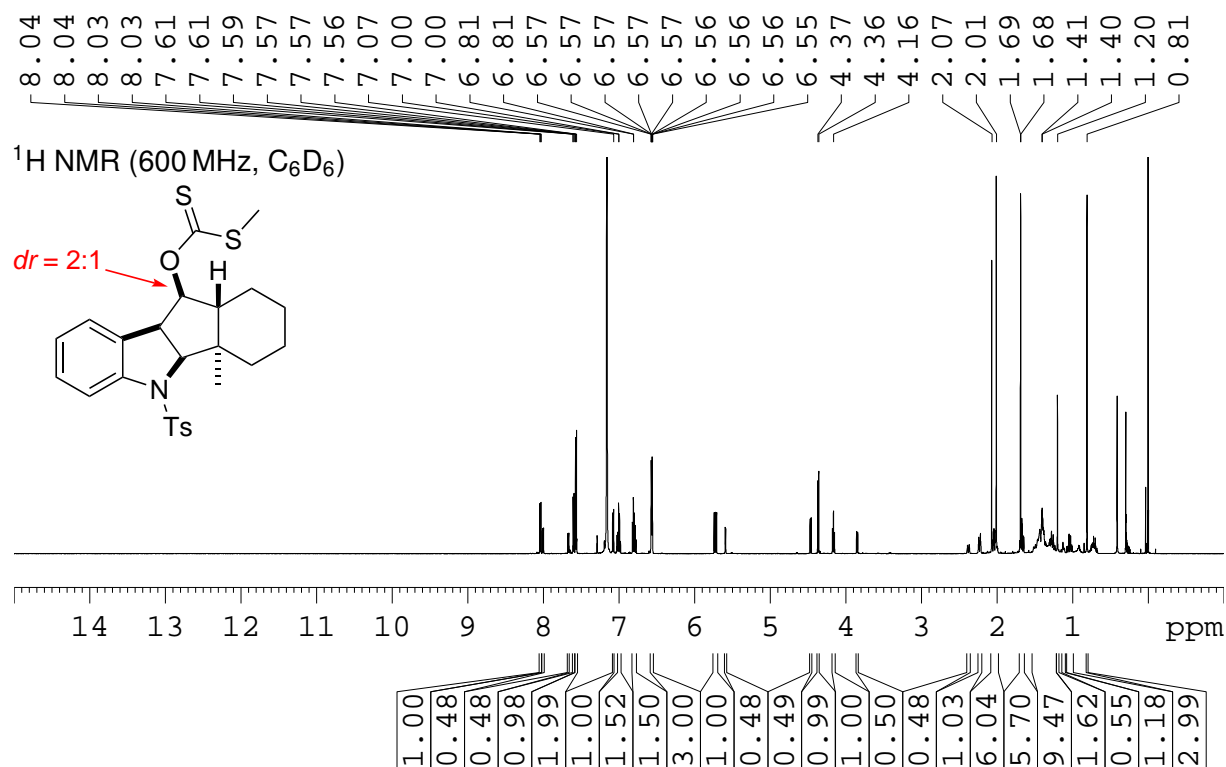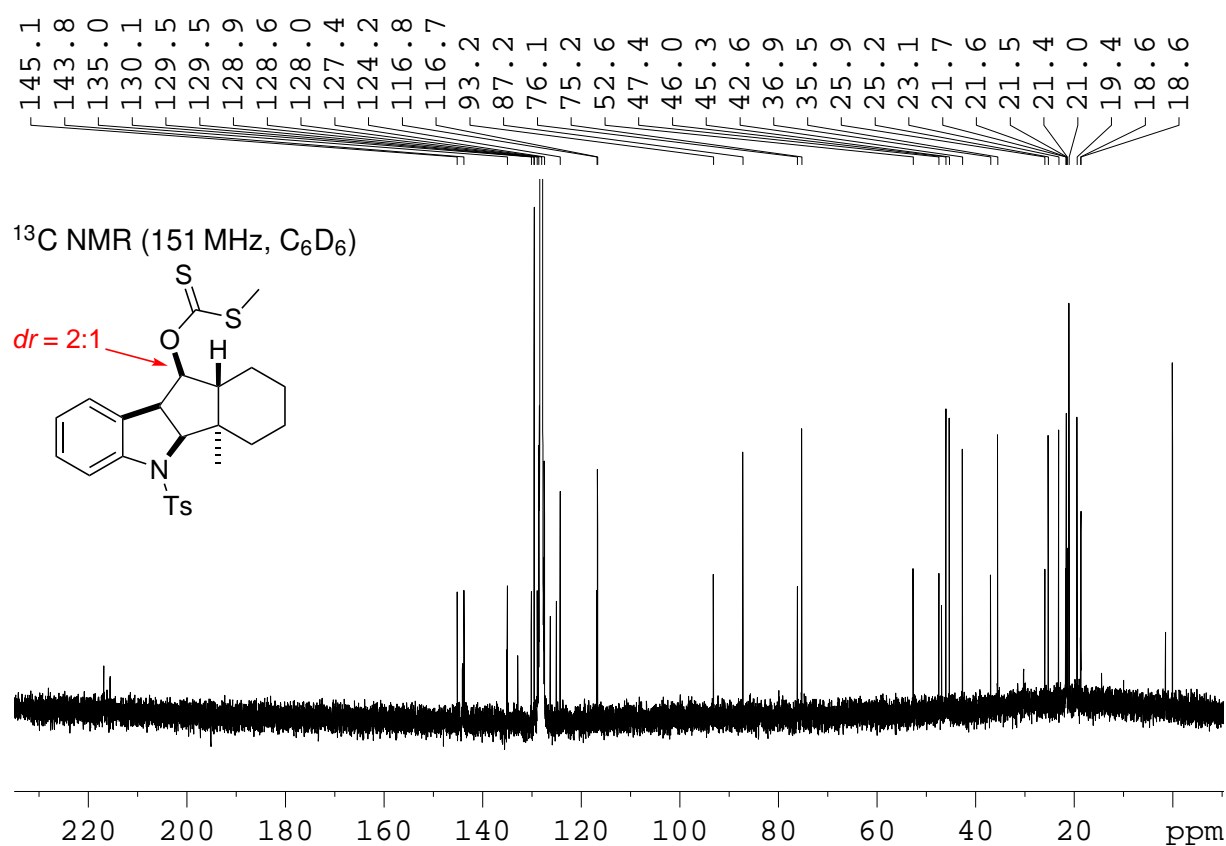

4 NMR spectra of new compounds

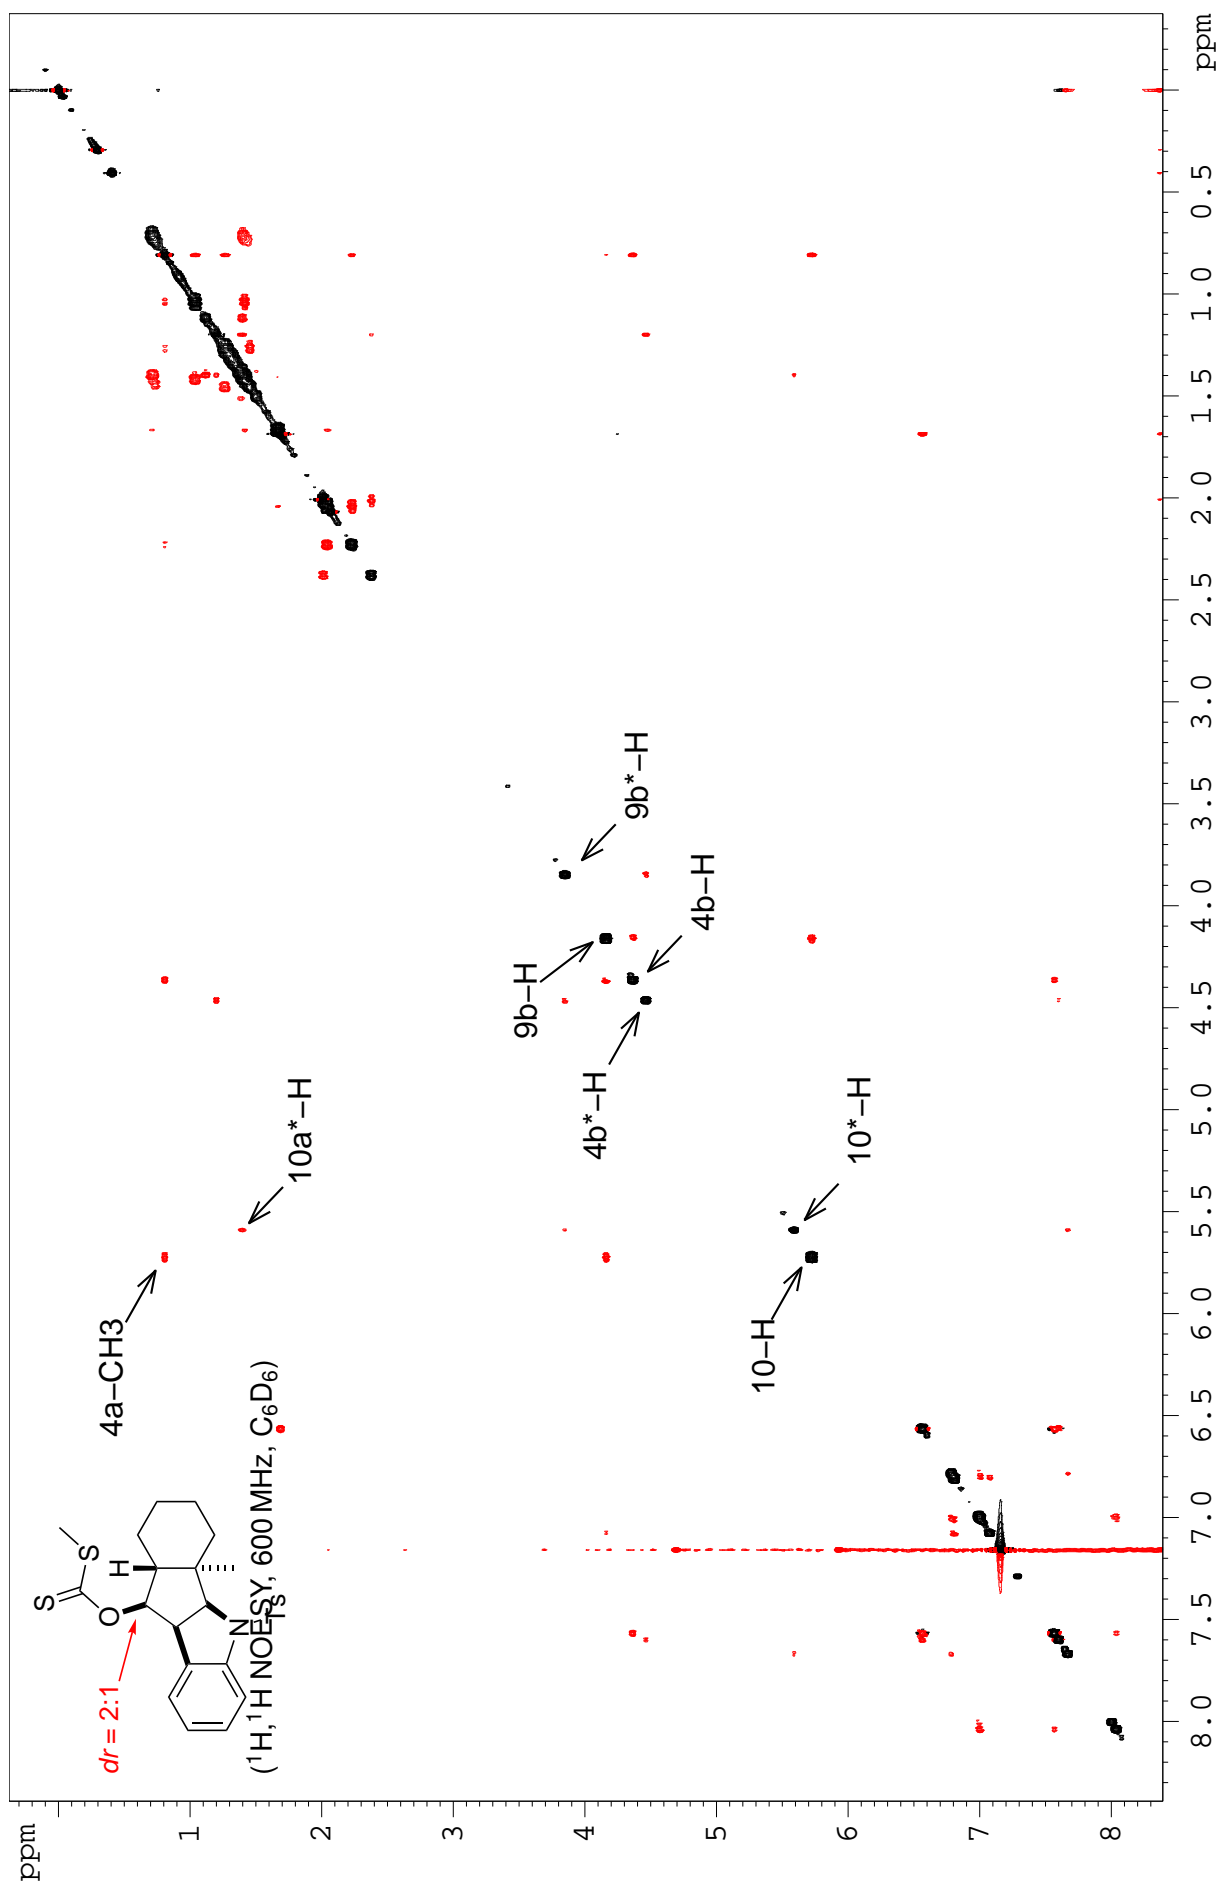

4 NMR spectra of new compounds

**Silyl ether S17**

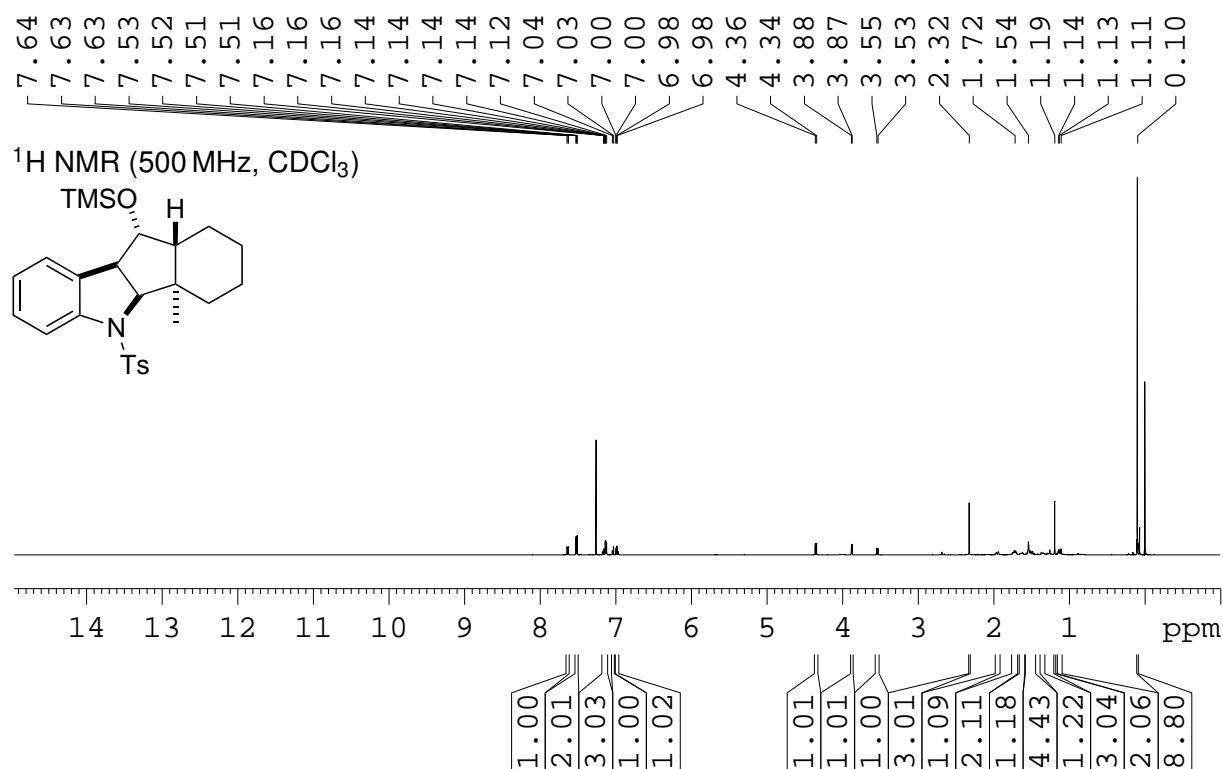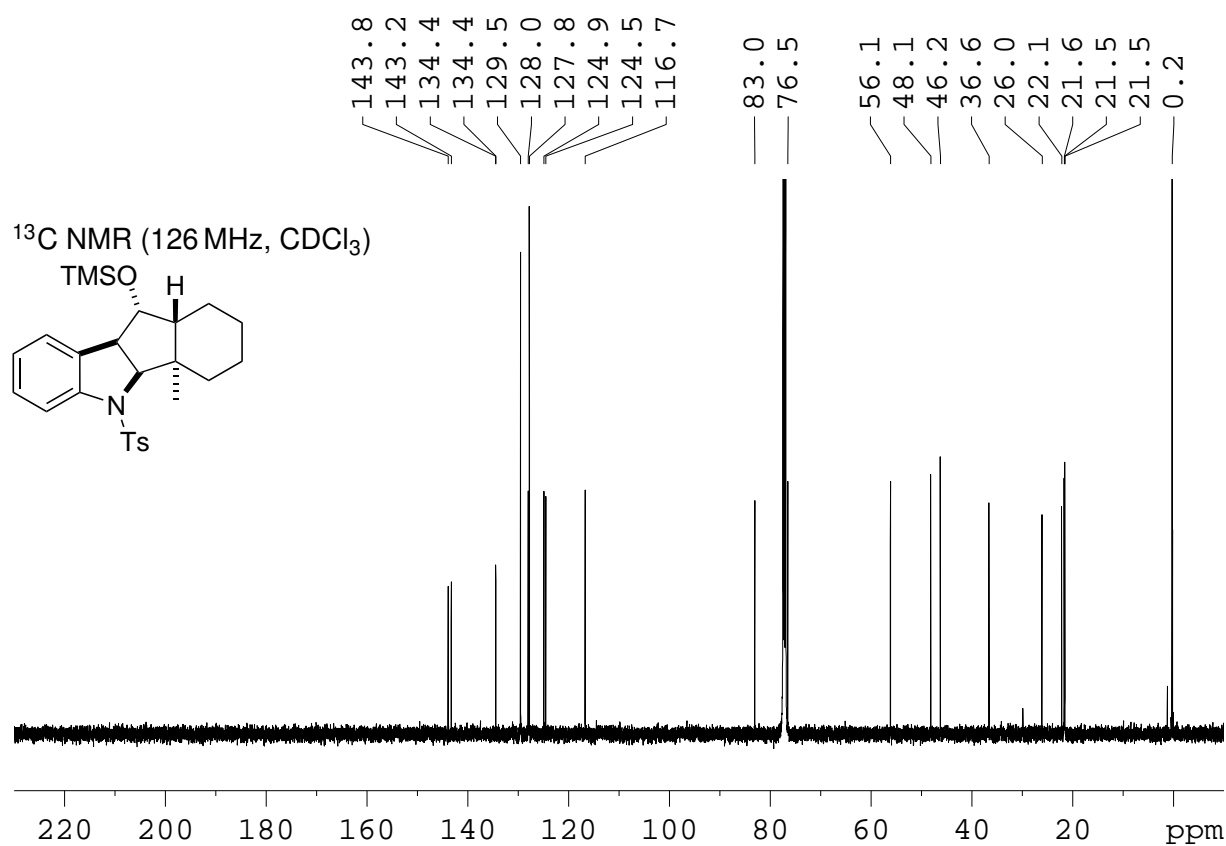

4 NMR spectra of new compounds

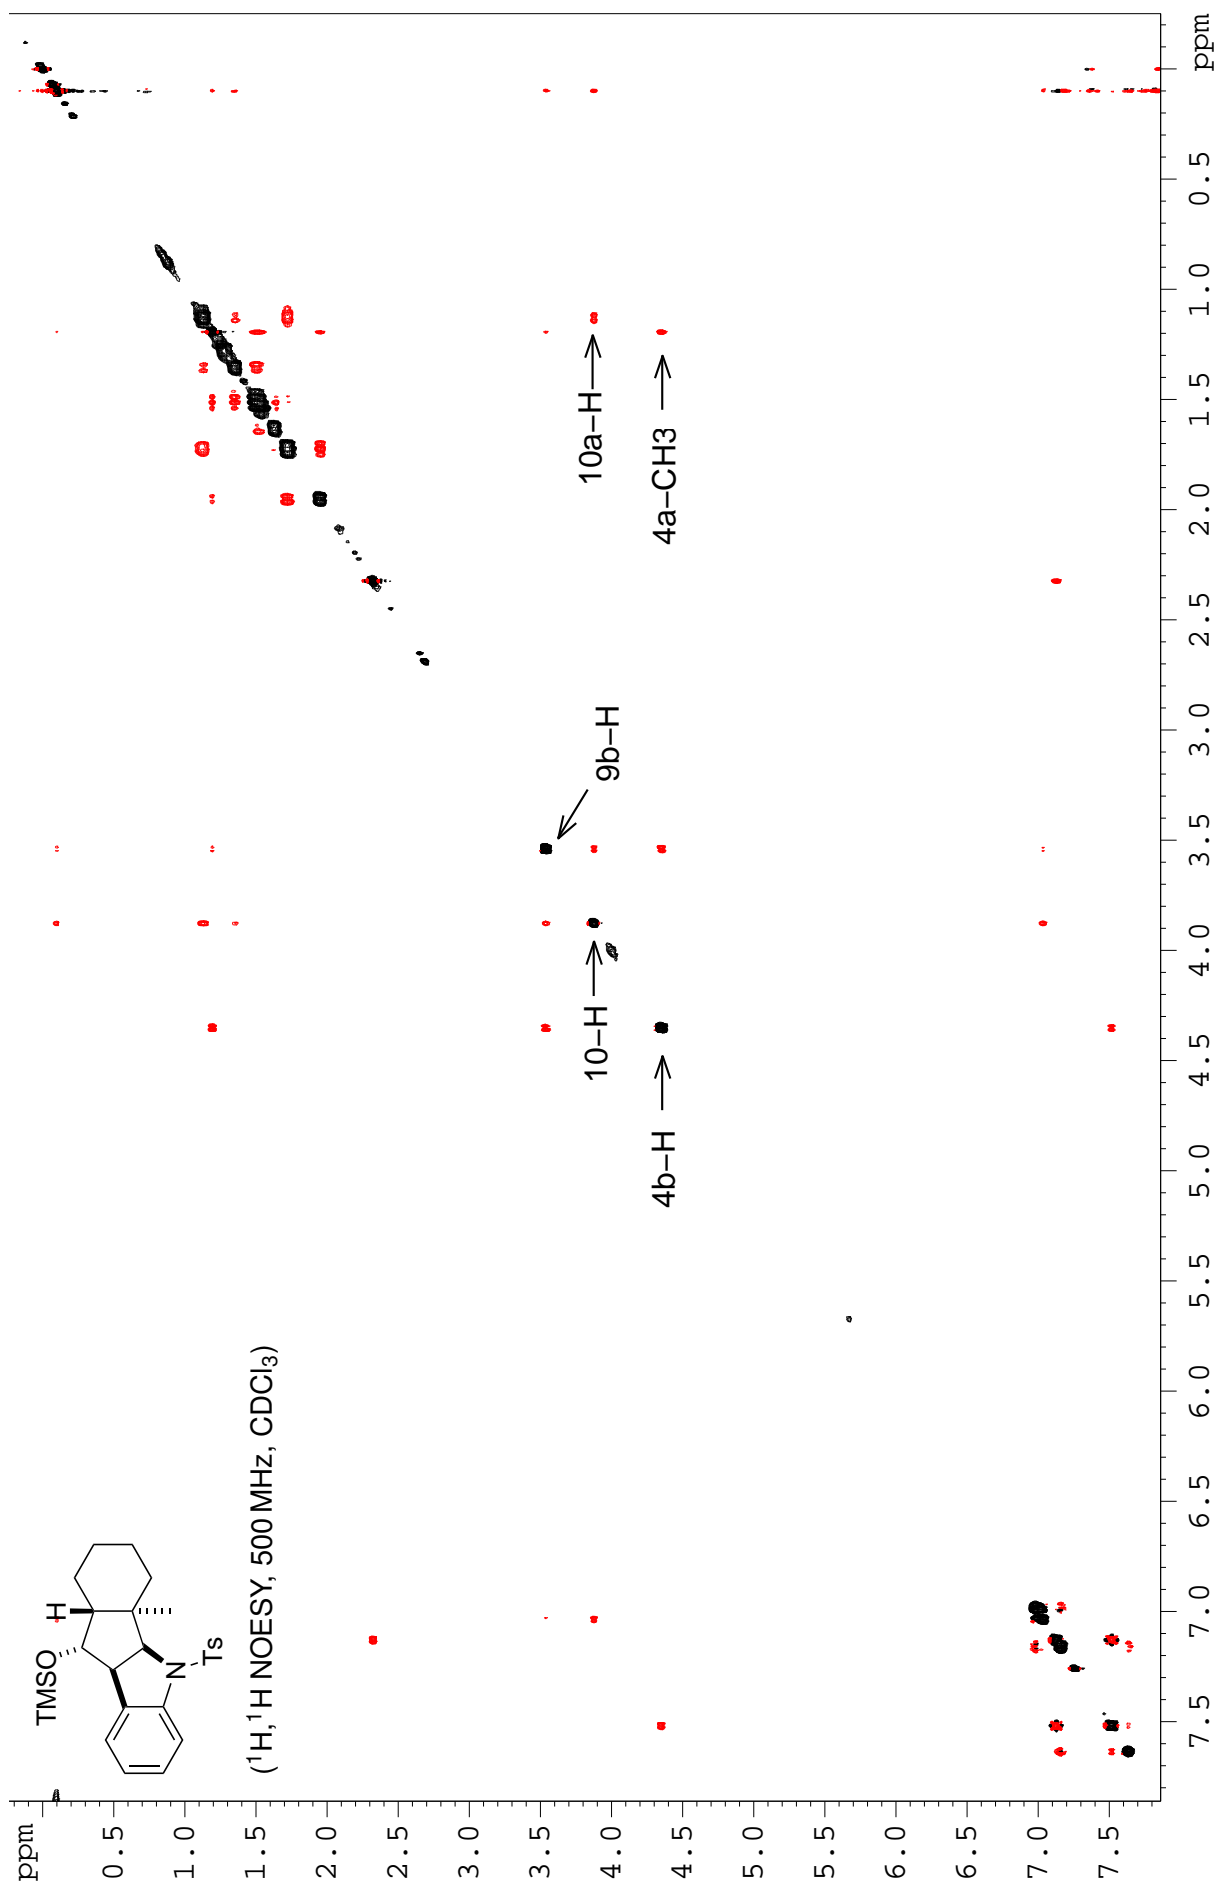

4 NMR spectra of new compounds

**Dithiolane 22**

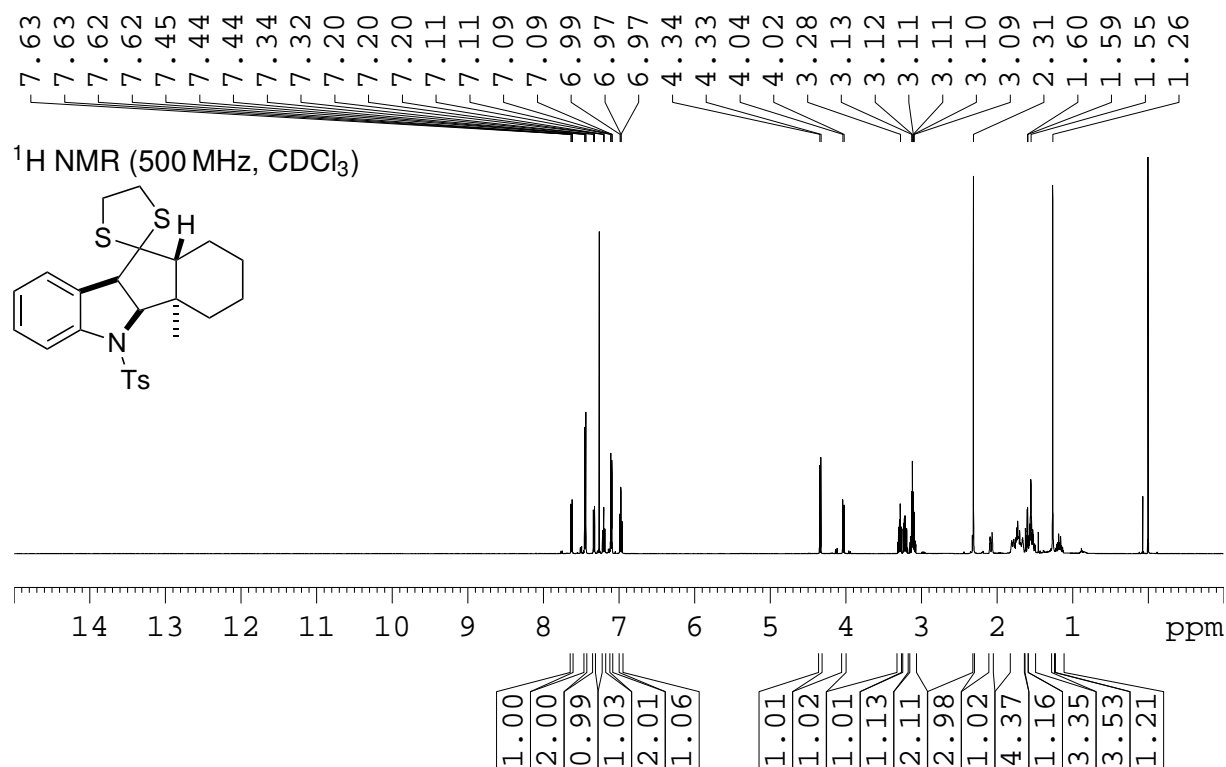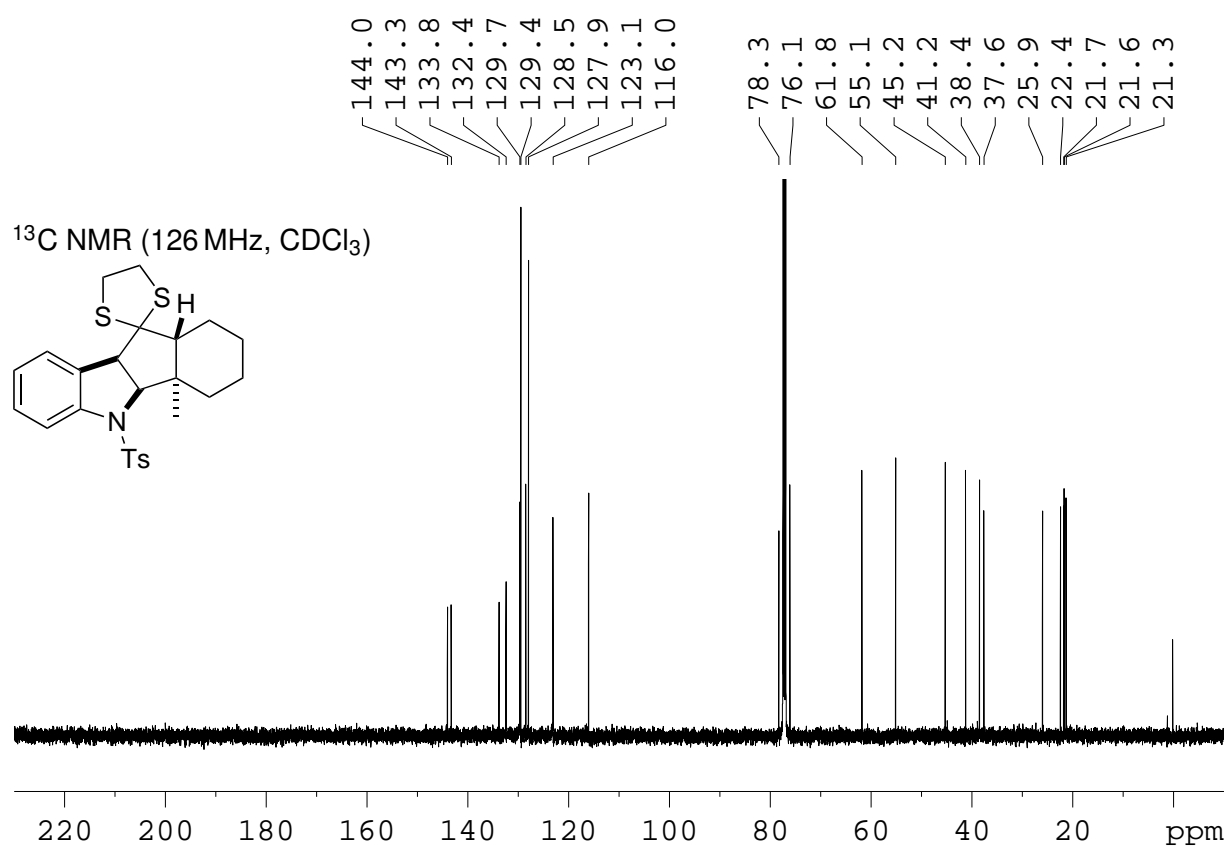

# 4 NMR spectra of new compounds

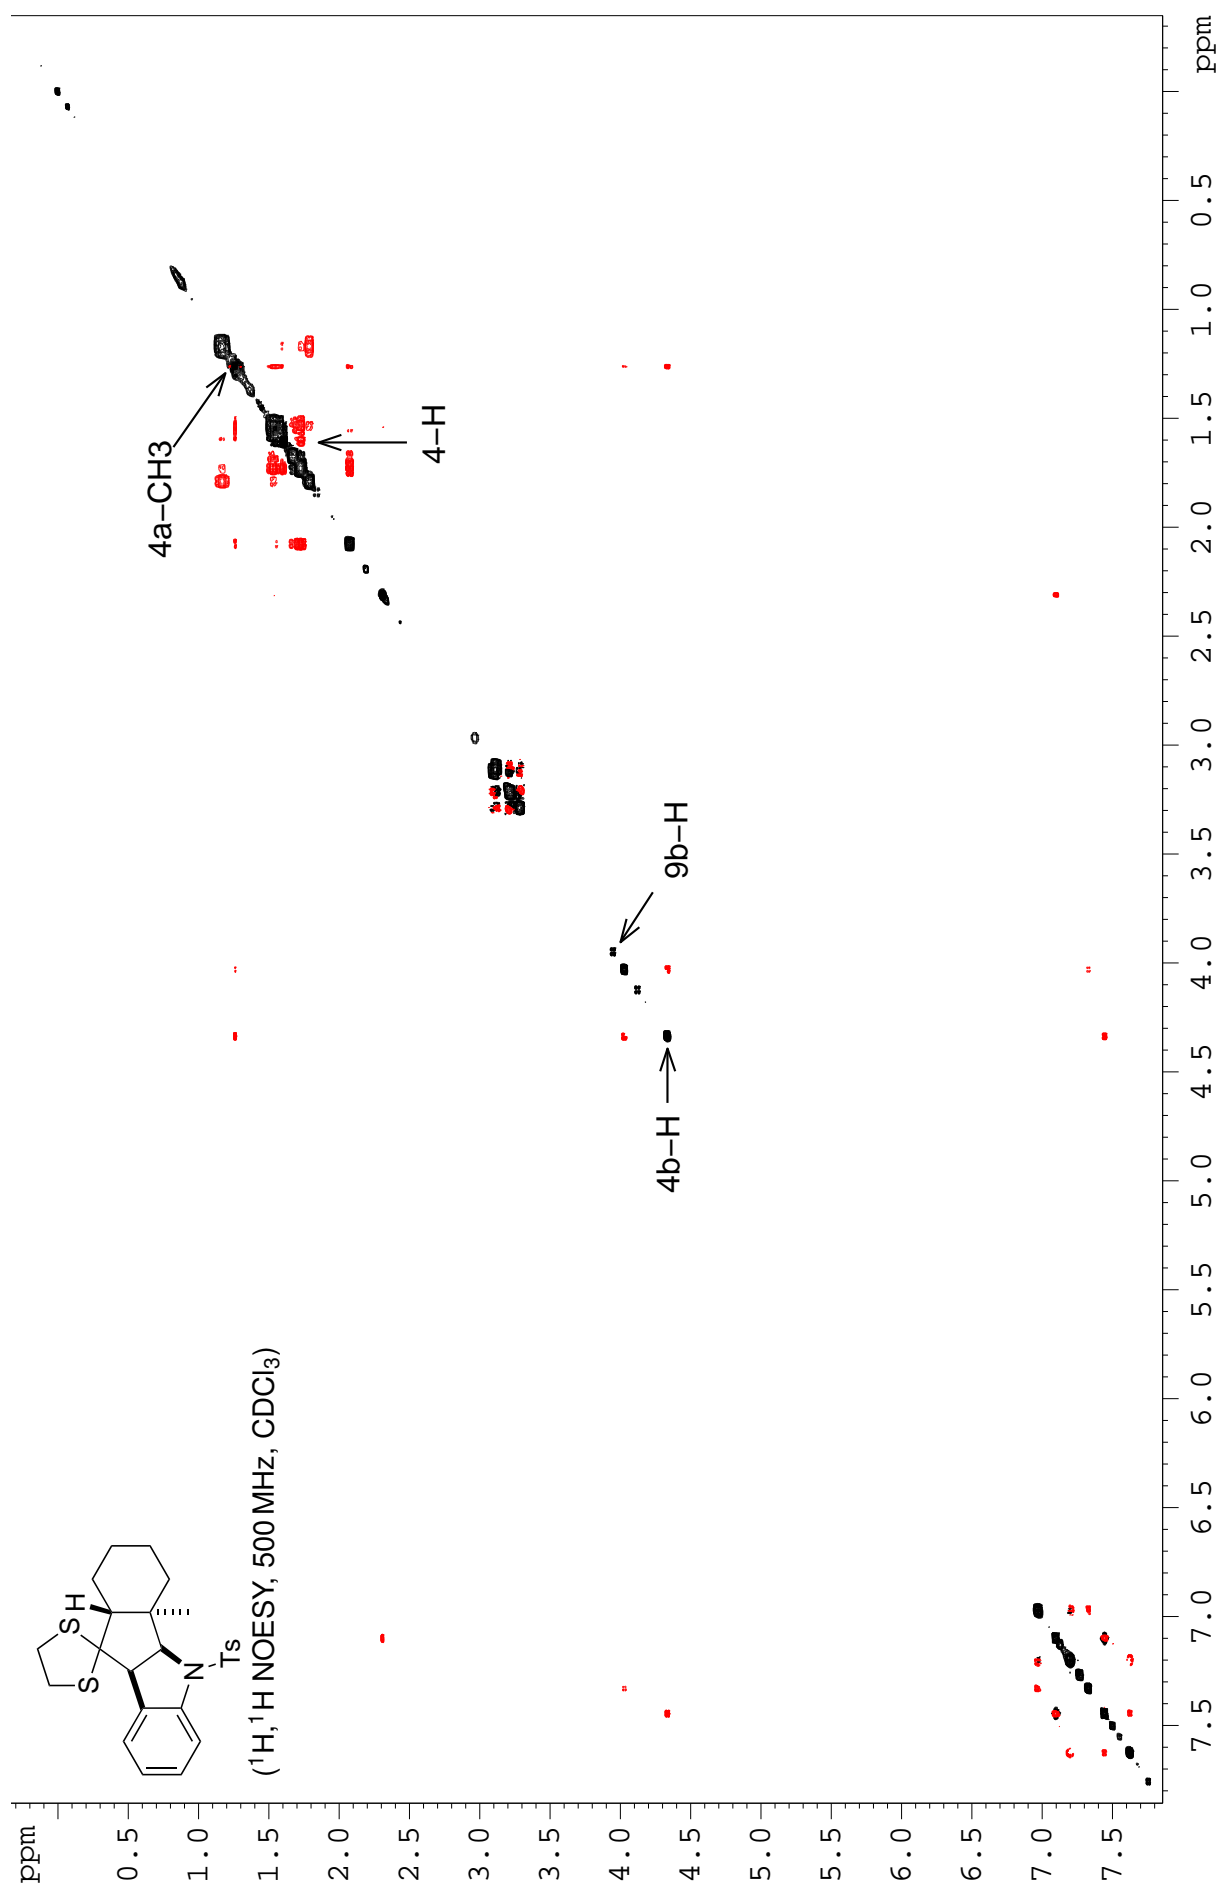

4 NMR spectra of new compounds

***trans*-Hydrindane 23**

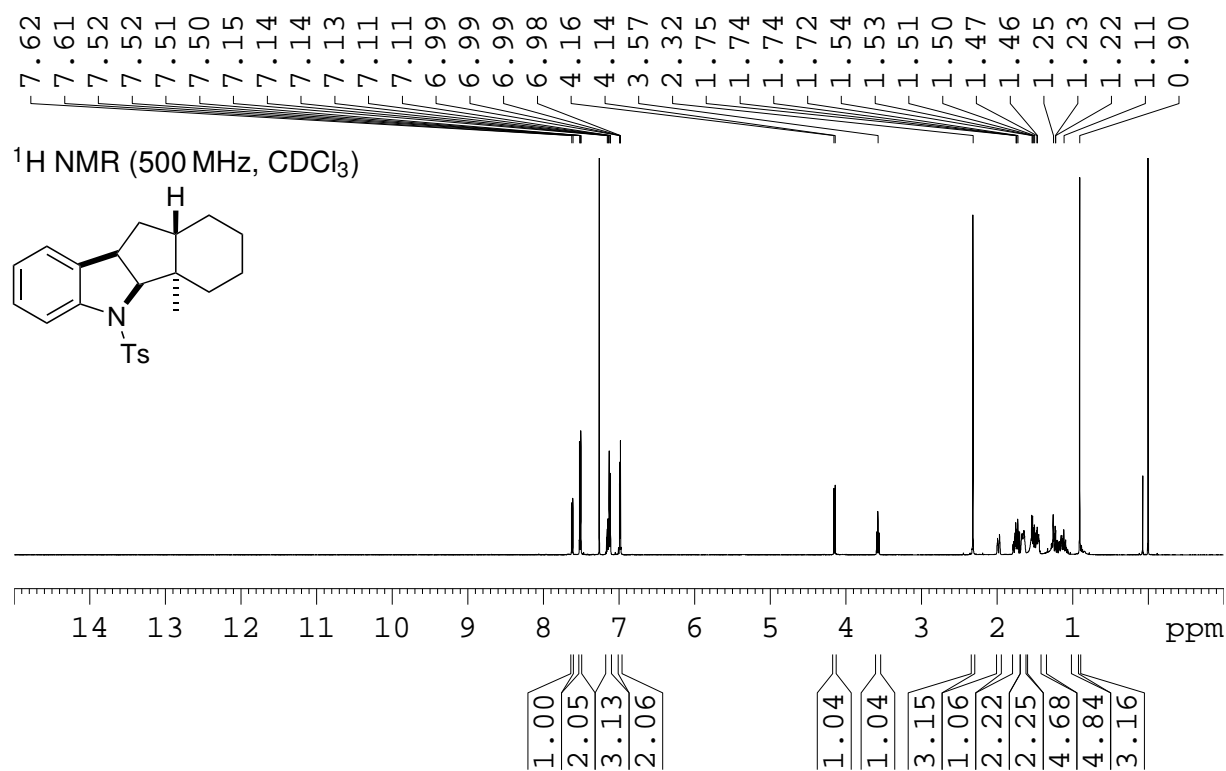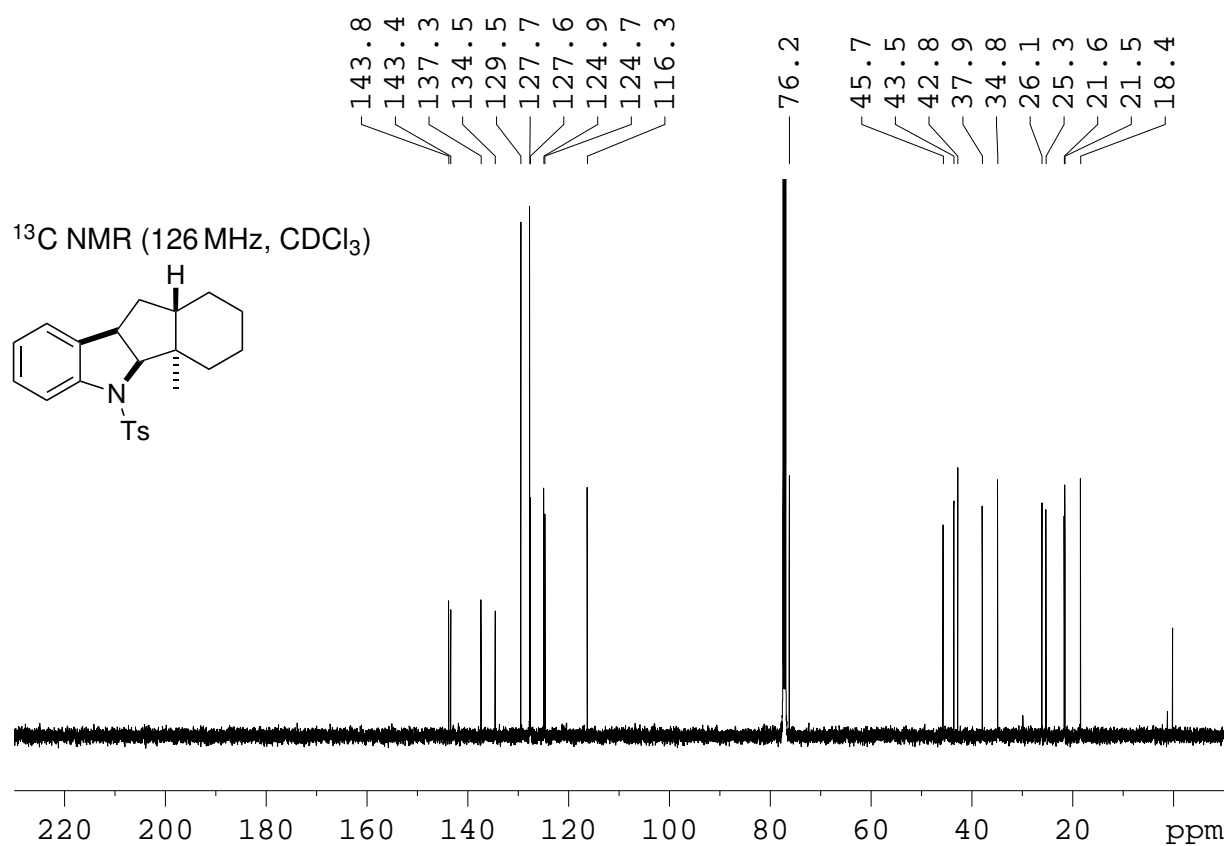



4 NMR spectra of new compounds

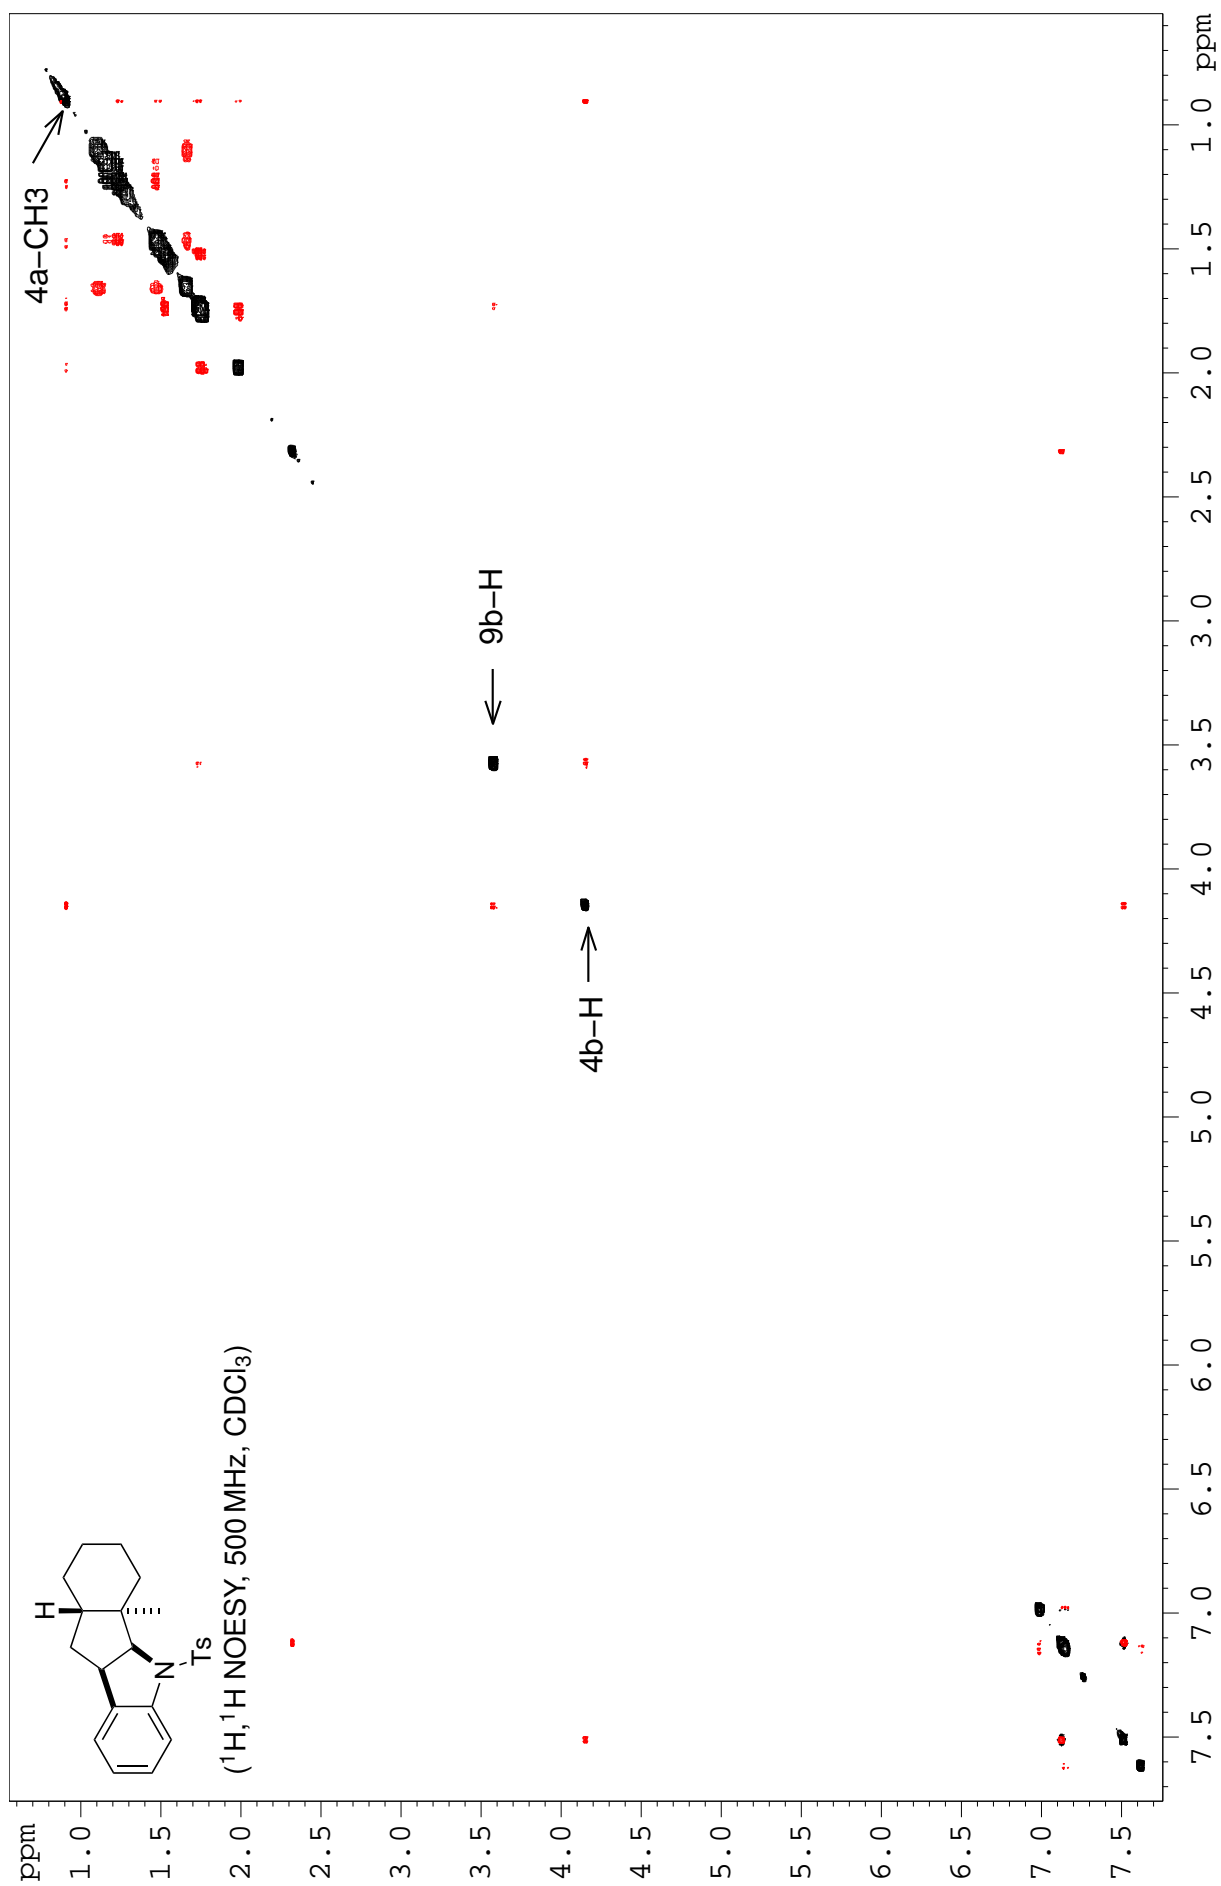

4 NMR spectra of new compounds

***trans*-Hydrindane 24**

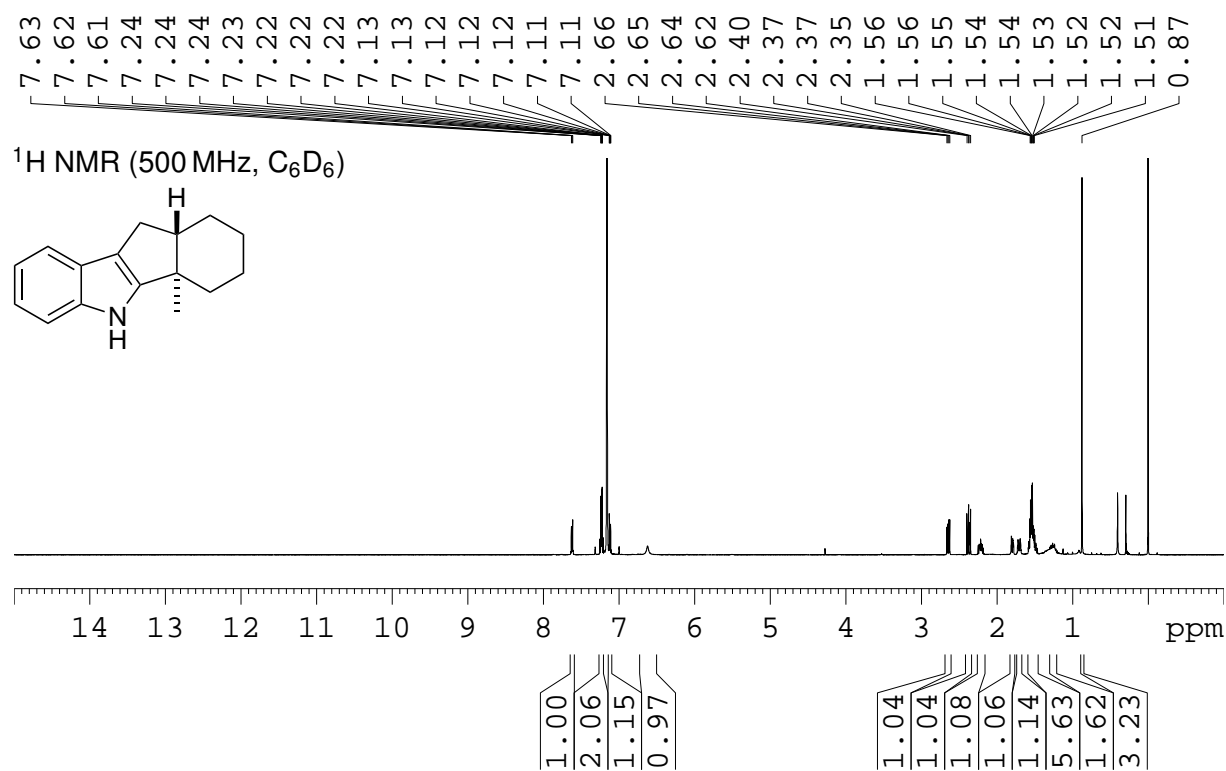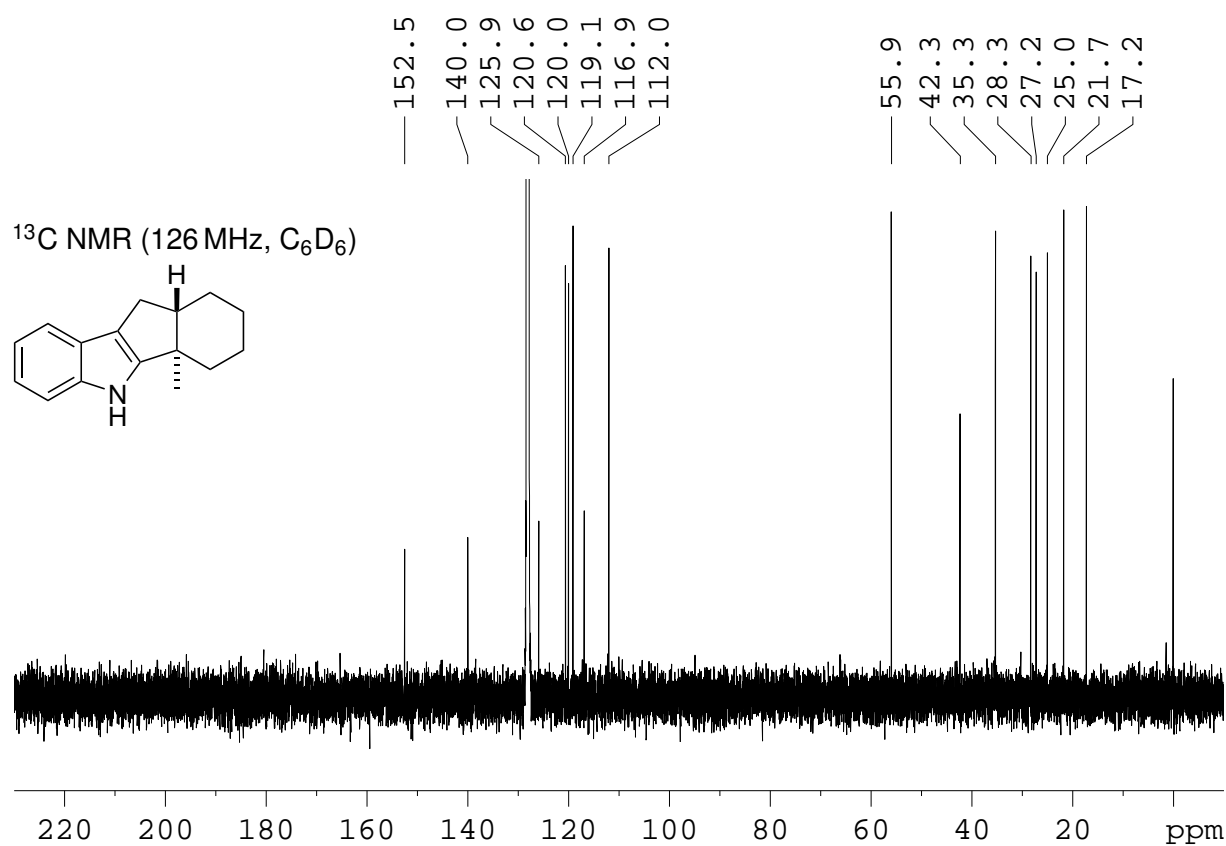

4 NMR spectra of new compounds

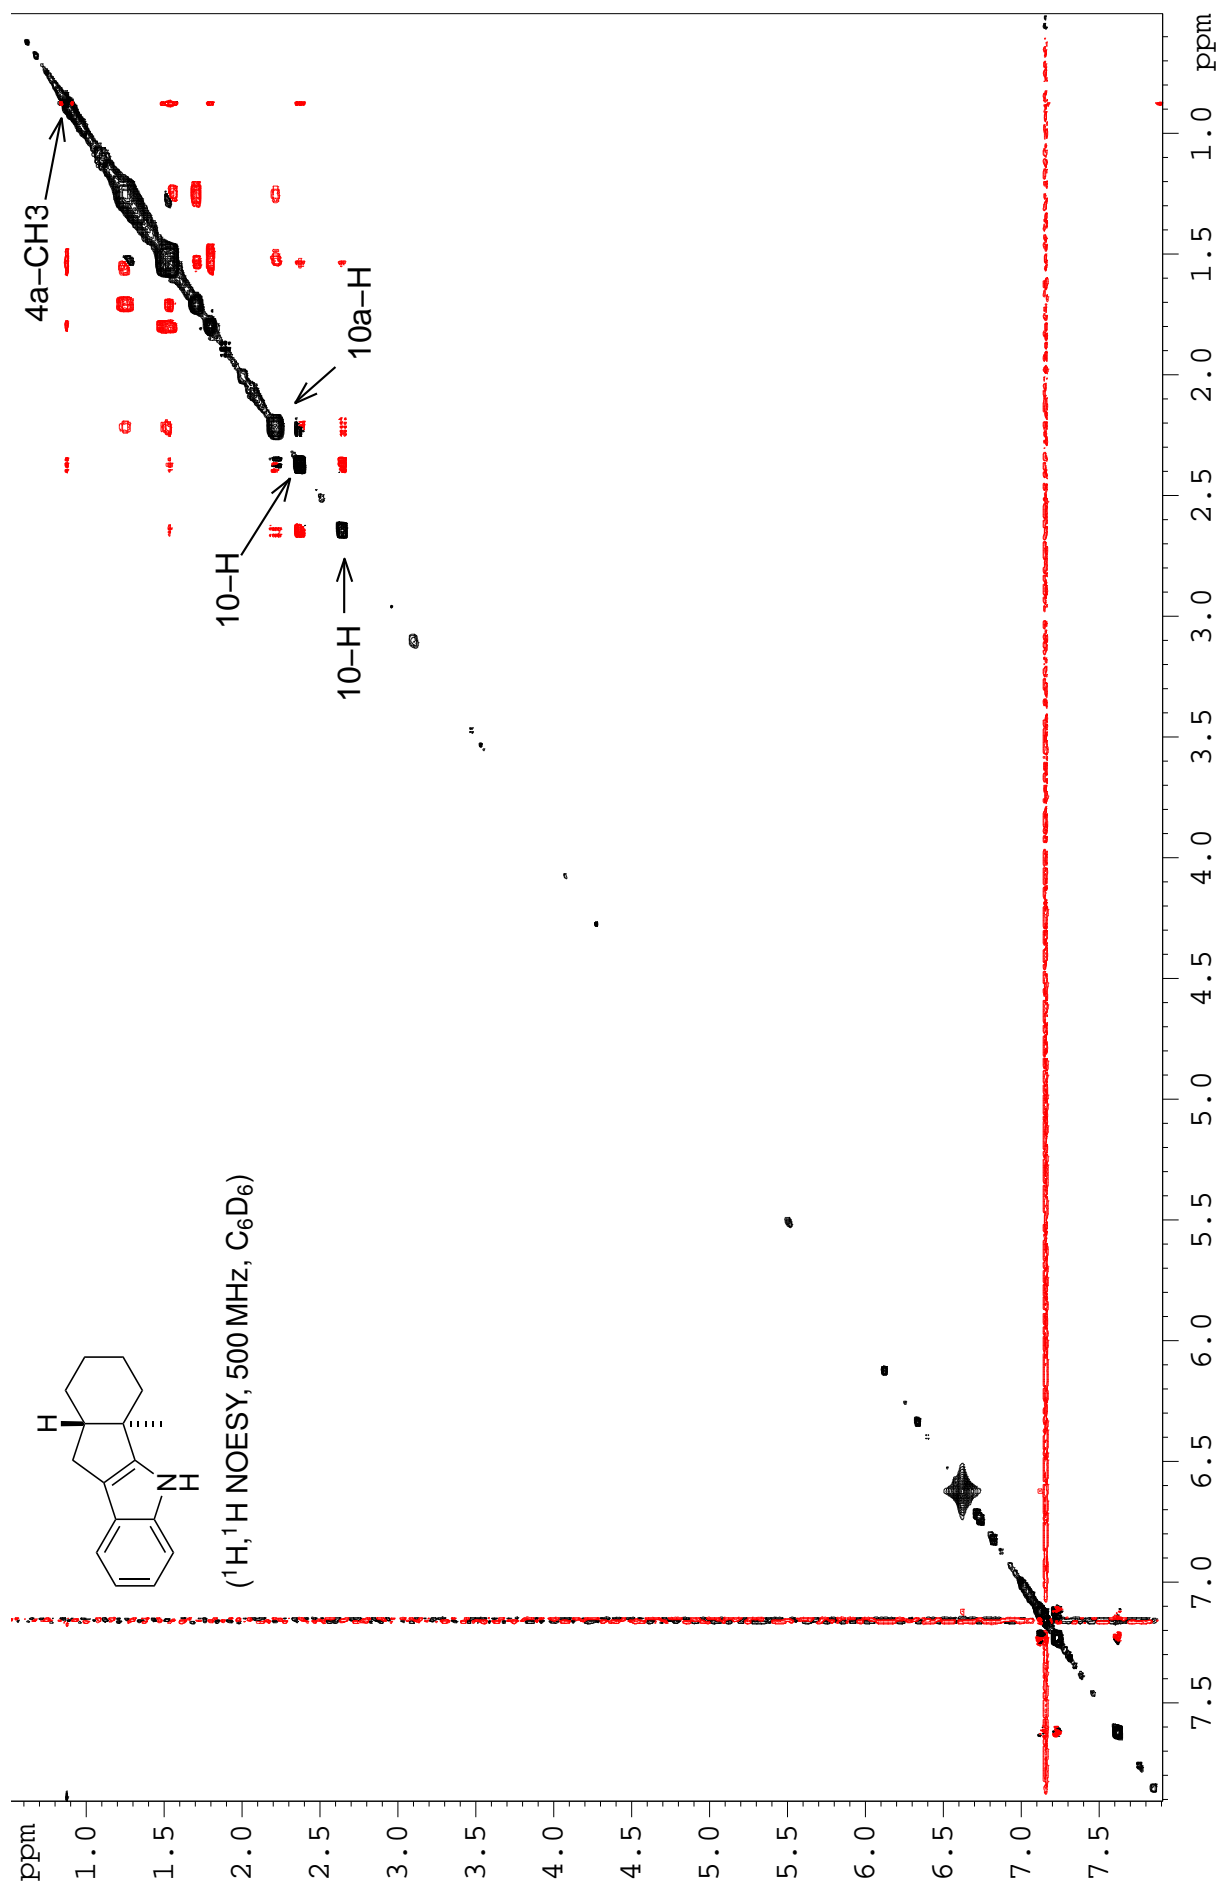

### Crystal Structure Determinations of Compounds **7** and **23**

Crystals for both compounds were obtained by evaporation from a mixture of *t*-butyl methyl ether and *n*-heptane. The selected crystals were mounted in inert oil on Hampton loops and transferred to the cold gas stream of a Rigaku/OD XtaLAB Synergy diffractometer. Mirror-focussed Mo- $K\alpha$  or Cu- $K\alpha$  radiation was employed for the intensity measurements of **7** and **23** respectively. Absorption corrections were implemented on the basis of multi-scans. The structure was refined anisotropically on  $F^2$  using the program SHELXL-2019.<sup>[9]</sup> The hydrogen atoms of the NH groups of **7** were refined freely, but with N-H distances restrained to be approximately equal (command "SADI"); other hydrogen atoms were included using rigid methyl groups or a riding model starting from calculated positions.

*Special features and exceptions:* The structure was refined as a two-component pseudomero-hedral twin (by 180° rotation about the  $\alpha$  axis). The relative volume of the minor twin component refined to 0.0977(9). The size of the integration box (used in the data reduction) was multiplied by 1.5 to enable better measurement of the split reflections, but this may have a systematic effect on the cell constants. The hydrogen atoms of the NH groups were refined freely. In the second independent molecule, the atoms C1' to C4' are disordered over two sets of positions. The occupation factors of the minor disorder component refined to 0.078(5). Appropriate restraints were employed to improve refinement stability, but the dimensions of disordered groups should always be interpreted with caution. CHECKCIF suggests the higher symmetry space group  $Pca2_1$ , but only with an 87% fit. However, the clear deviation of the  $\beta$  angle from 90° rules out this possibility. Compound **23** also crystallizes in a non-centrosymmetric space groups, with three independent molecules. The usual checks did not indicate any higher symmetry. The structure was refined as a two-component inversion twin; the relative volume of the smaller component refined to 0.471(10).

Crystallographic data are summarized in Table S1, and ellipsoid plots are presented as Figures S2 and S3. Figure S4 shows a packing diagram for **7**; the packing of **23** is extremely complex and we do not analyze it here. Complete data have been deposited with the Cambridge Crystallographic Data Centre under the numbers CCDC 2289675-6. Copies of the data can be obtained free of charge from [www.ccdc.cam.ac.uk/data\\_request/cif](http://www.ccdc.cam.ac.uk/data_request/cif).

[9] G. M. Sheldrick, *Acta Crystallogr. Sect. A: Found. Adv.* **2015**, *71*, 3–8.

## 5 X-ray crystallographic data

Table S1. Crystallographic data and structure refinement details for compounds **7** and **23**.

| Compound                                       | <b>7</b>                           | <b>23</b>                                         |
|------------------------------------------------|------------------------------------|---------------------------------------------------|
| Formula                                        | C <sub>16</sub> H <sub>17</sub> NO | C <sub>23</sub> H <sub>27</sub> NO <sub>2</sub> S |
| <i>M<sub>r</sub></i>                           | 239.30                             | 381.51                                            |
| Crystal habit                                  | colourless tablet                  | colourless needle                                 |
| Cryst. size (mm)                               | 0.25 x 0.2 x 0.15                  | 0.15 x 0.03 x 0.02                                |
| Crystal system                                 | monoclinic                         | monoclinic                                        |
| Space group                                    | <i>Pc</i>                          | <i>Ia</i>                                         |
| Temperature (°C)                               | -173                               | -173                                              |
| <i>a</i> (Å)                                   | 6.14568(10)                        | 12.34580(14)                                      |
| <i>b</i> (Å)                                   | 12.1476(2)                         | 27.6089(3)                                        |
| <i>c</i> (Å)                                   | 16.5252(3)                         | 18.0509(2)                                        |
| α (°)                                          | 90                                 | 90                                                |
| β (°)                                          | 90.6799(16)                        | 105.9373(12)                                      |
| γ (°)                                          | 90                                 | 90                                                |
| <i>V</i> (Å <sup>3</sup> )                     | 1233.61                            | 5916.24                                           |
| <i>Z</i>                                       | 4                                  | 12                                                |
| <i>D<sub>x</sub></i> (Mg m <sup>-3</sup> )     | 1.289                              | 1.285                                             |
| λ (Å)                                          | 0.71073                            | 1.54184                                           |
| μ (mm <sup>-1</sup> )                          | 0.08                               | 1.6                                               |
| Transmissions                                  | 0.733 – 1.000                      | 0.635 – 1.000                                     |
| <i>F</i> (000)                                 | 512                                | 2448                                              |
| 2θ <sub>max</sub>                              | 41.1                               | 80.5                                              |
| Refl. measured                                 | 123169                             | 116565                                            |
| Refl. indep.                                   | 16066                              | 12388                                             |
| <i>R</i> <sub>int</sub>                        | 0.040                              | 0.042                                             |
| Parameters                                     | 353                                | 737                                               |
| Restraints                                     | 31                                 | 2                                                 |
| <i>wR</i> ( <i>F</i> <sup>2</sup> , all refl.) | 0.106                              | 0.079                                             |
| <i>R</i> ( <i>F</i> , >4σ( <i>F</i> ))         | 0.038                              | 0.030                                             |
| <i>S</i>                                       | 1.08                               | 1.04                                              |
| Max. Δρ (e Å <sup>-3</sup> )                   | 0.66, -0.30                        | 0.34, -0.33                                       |

## 5 X-ray crystallographic data

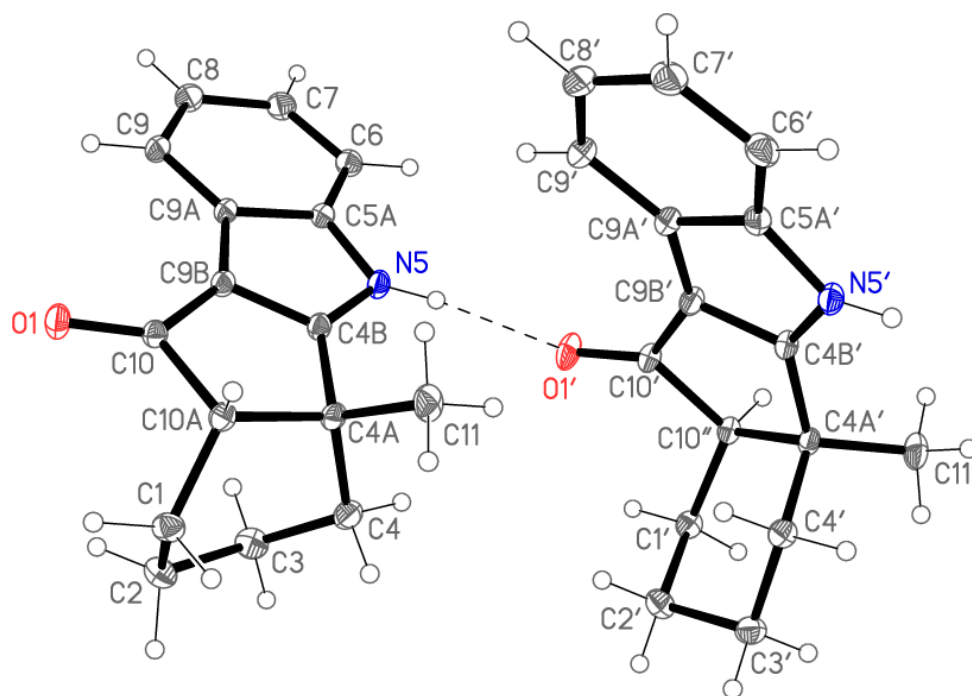

Figure S2. The two independent molecules of compound **7** in the crystal. Ellipsoids correspond to 50% probability levels. Only the major orientation of the slightly disordered atoms C1' – C4' is shown. The dashed line indicates a hydrogen bond.

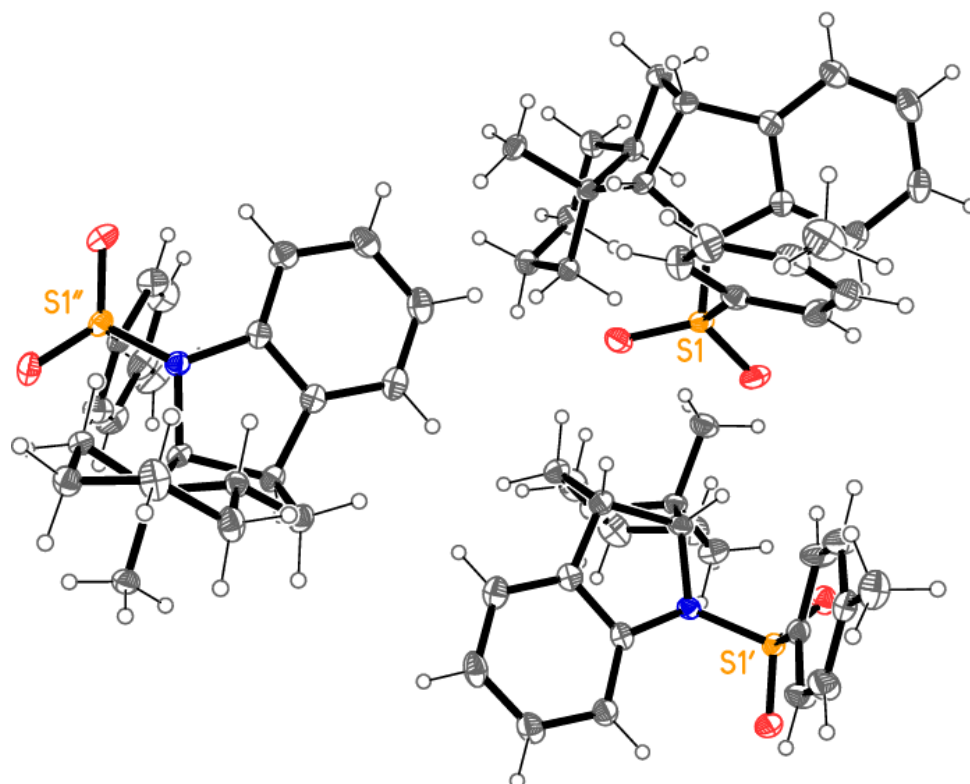

Figure S3. The three independent molecules of compound **23** in the crystal (one of these is shown in more detail in the main paper). Ellipsoids correspond to 50% probability levels. For clarity, only the sulfur atoms are labeled.

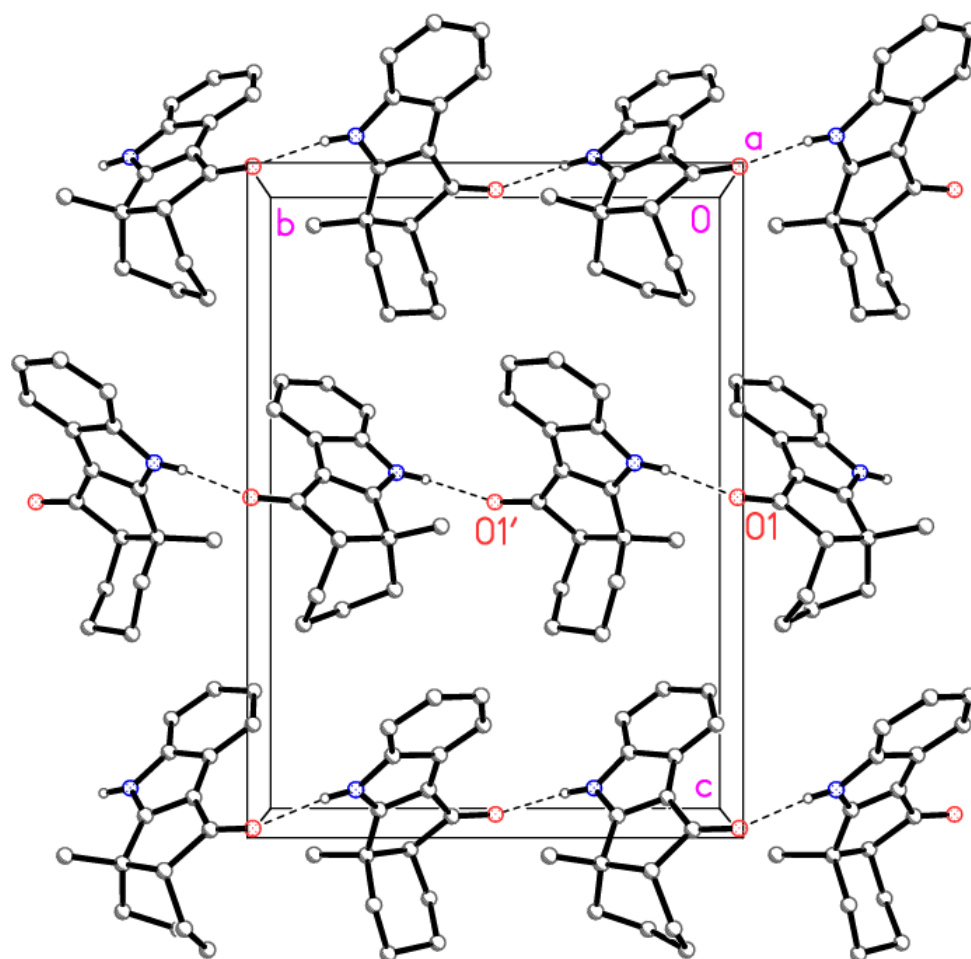

Figure S4. Packing diagram of compound 7, viewed parallel to the *a* axis and showing the formation of simple chains of molecules, in which the two independent molecules alternate, parallel to the *b* axis. The dashed lines indicate hydrogen bonds. Hydrogen atoms not involved in hydrogen bonding are omitted for clarity.
